# Supplementary material for: Mechanistic study of the complex photooxidation of allyl methyl sulfide (AMS): reaction paths and products of addition under different atmospheric conditions
Source: Royal Society of Chemistry journal article supplement (doi:10.1039/d3ea00010a), 2023-01-01
Supplement: d3ea00010a1.pdf [file d3ea00010a1.pdf]

## Supplementary Information

### **Mechanistic Study of the Complex Photooxidation of Allyl Methyl Sulfide (AMS). Reaction Paths and Products of Addition at Different Atmospheric Conditions.**

Alejandro L. Cardona<sup>a</sup>, María B. Blanco<sup>a</sup>, Mariano Teruel<sup>\*a</sup>, Oscar N. Ventura<sup>\*b</sup>.

<sup>a</sup> Instituto de Investigaciones en Fisicoquímica de Córdoba (I.N.F.I.Q.C.), CONICET, Dpto. de Fisicoquímica, Facultad de Ciencias Químicas, Universidad Nacional de Córdoba. Ciudad Universitaria, 5000 Córdoba, Argentina.

<sup>b</sup> Computational Chemistry and Biology Group (CCBG), Detema, Facultad de Química, Universidad de la República, Montevideo, Uruguay.

\* Corresponding authors: Mariano A. Teruel ([mteruel@fcq.unc.edu.ar](mailto:mteruel@fcq.unc.edu.ar)),  
Oscar N. Ventura ([Oscar.N.Ventura@gmail.com](mailto:Oscar.N.Ventura@gmail.com))

# Contents

|            |                                                                                                                                                                             |     |
|------------|-----------------------------------------------------------------------------------------------------------------------------------------------------------------------------|-----|
| <b>I.</b>  | Optimized geometries and vibrational frequencies of species considered in the Allyl Methyl Sulfide oxidation initiated by OH radicals.....                                  | 3   |
|            | Table S1. IUPAC nomenclature and given names for reactants, products and intermediaries optimized in this work.....                                                         | 4   |
| A.         | AMS and simple molecules.....                                                                                                                                               | 6   |
| B.         | Products (P).....                                                                                                                                                           | 12  |
| C.         | Intermediaries ( $_Im$ ).....                                                                                                                                               | 32  |
| 1.         | Addition of OH at C1 and C2.....                                                                                                                                            | 32  |
| 2.         | Reactions of the peroxy radicals (A1O2, A2O2) with NO <sub>2</sub> .....                                                                                                    | 42  |
| 3.         | Intramolecular rearrangement mechanism in RO <sub>2</sub> intermediates (A1O2-A2O2).....                                                                                    | 45  |
| 4.         | MSP decomposition.....                                                                                                                                                      | 59  |
| D.         | Transitions States (TS) and Postreaction Wells (PW).....                                                                                                                    | 75  |
| 1.         | Addition of OH at C1 and C2.....                                                                                                                                            | 75  |
| 2.         | Reactions of the peroxy radicals (A1O2, A2O2) with NO <sub>2</sub> .....                                                                                                    | 102 |
| 3.         | Intramolecular rearrangement mechanism in RO <sub>2</sub> intermediates (A1O2-A2O2).....                                                                                    | 106 |
| 4.         | MSP decomposition.....                                                                                                                                                      | 147 |
| <b>II.</b> | Thermochemistry tables.....                                                                                                                                                 | 164 |
| A.         | Table S2. Calculated relative energies (kcal mol <sup>-1</sup> ) of the gas phase oxidation of AMS initiated by OH radicals in the absence of NO <sub>x</sub> radicals..... | 165 |
| B.         | Table S3. Calculated relative energies (kcal mol <sup>-1</sup> ) for the gas phase decomposition of the A1O2 intermediate: C1 addition.....                                 | 167 |
| C.         | Table S4. Calculated relative energies (kcal mol <sup>-1</sup> ) for the gas phase decomposition of the A2O2 intermediate: C2 addition.....                                 | 168 |
| D.         | Table S5. Calculated relative energies (kcal mol <sup>-1</sup> ) for the gas phase decomposition of the MSP intermediate.....                                               | 169 |

I. Optimized geometries and vibrational frequencies of species considered in the Allyl Methyl Sulfide oxidation initiated by OH radicals.

This section includes the optimized geometries in XYZ format and vibrational frequencies at the M06-2X-GD3/aug-cc-pVTZ level of theory. Calculated energies for all methods used in this work are also included. For each transitions state (TS), a postreaction well (PW) and the intrinsic reaction coordinate (IRC) were determined.

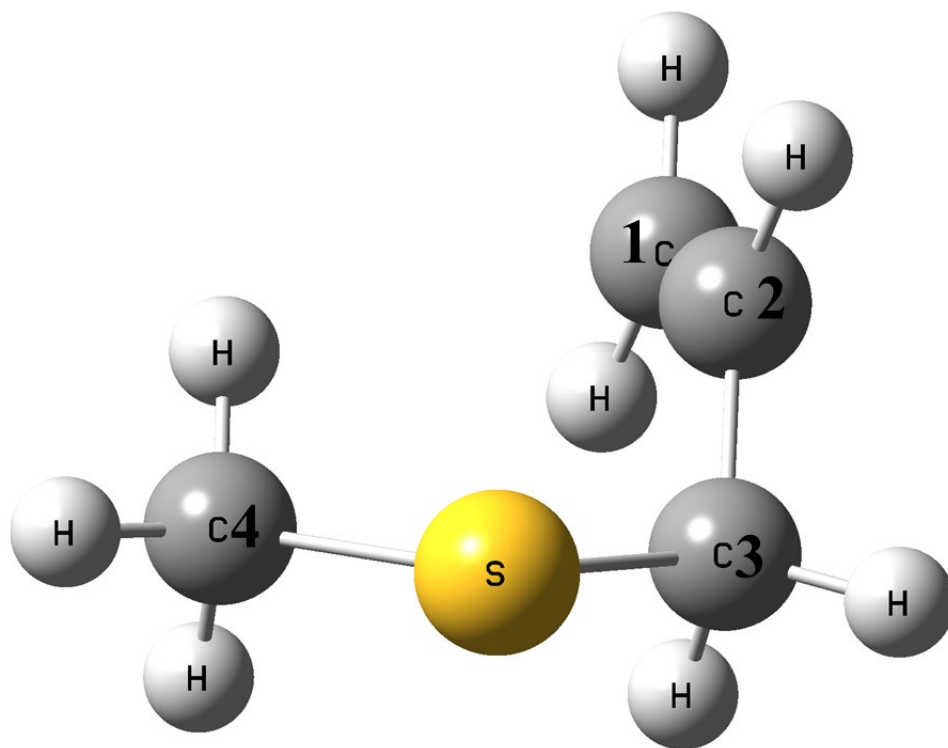

*Figure S 1. Numbering of carbon atoms in the AMS molecule: C1 and C2 are attached by a double bond, C3 is between double bond and sulfur and C4 is the methyl carbon bonded to sulfur.*

Table S1. IUPAC nomenclature and given names for reactants, products and intermediaries optimized in this work.

| IUPAC Nomenclature                                | Given Name |
|---------------------------------------------------|------------|
| allyl methyl sulfide                              | AMS        |
| 1-hydroxy-3-(methylthio)-2-propyl radical         | A1         |
| 2-hydroxy-3-(methylthio)-1-propyl radical         | A2         |
| 2-peroxy-3-(methylthio)-propan-1-ol radical       | A1O2       |
| 1-peroxy-3-(methylthio)-propan-2-ol radical       | A2O2       |
| 2-hydroxy-1-[(methylthio)-methyl]-ethoxyl radical | A1O        |
| 2-hydroxy-3-(methylthio)-propoxyl radical         | A2O        |
| methyl thiomethyl radical                         | Ad_Im1     |
| 1-hydroxy-2-(methylthio)-ethyl radical            | Ad_Im2     |
| 1-hydroxy-2-(methylthio)-ethyldioxyl radical      | Ad_Im2-O2  |
| 1-hydroxy-2-(methylthio)-ethoxyl radical          | Ad_Im2-O   |
| hydroxymethyl radical                             | P3_Im1     |
| hydroxy methylene                                 | P3_Im2     |
| methyl hydroperoxide                              | P3_Im3     |
| methylthio radical                                | MeS        |
| methylthiodioxyl radical                          | MeS-O2     |
| methylthiooxyl radical                            | MeS-O      |
| 2-hydroxyacetaldehyde                             | P1         |
| 1,2-ethenediol                                    | P1'        |
| 2-methyl thio acetaldehyde                        | P2         |
| formaldehyde                                      | P3         |
| formic acid                                       | P4         |
| acetaldehyde                                      | P5         |
| vinyl alcohol                                     | P5'        |
| sulfur dioxide                                    | P6         |
| nitric acid                                       | P7         |
| 2-hydroxy-3-(methylthio)-propanal                 | P8         |
| 2-propen-1-ol                                     | P9         |
| 1-hydroxy-3-(methylthio)-propan-2-one             | P10        |
| (E)-3-(methylthio)-prop-2-en-1-ol                 | P11        |
| thioformaldehyde S-methylide                      | P12        |
| (Z)-2-(methylthio)-ethen-1-ol                     | P13        |
| methanethial                                      | P14        |
| sulfur monoxide                                   | P15        |
| carbon oxide sulfide                              | P16        |
| formic thioanhydride                              | P17        |
| dimethyl disulfide                                | DMDS       |
| 3-hydroxy-2-(methylthiodioxy)-propyl radical      | A1_Im1_1   |

| IUPAC Nomenclature                                      | Given Name |
|---------------------------------------------------------|------------|
| 2-hydroperoxy-3-(methylthio)-propoxyl radical           | A1_Im1_2   |
| 2-hydroperoxy-1-hydroxy-3-(methylthio)-2-propyl radical | A1_Im2_1   |
| 2-hydroperoxy-3-hydroxy-1-(methylthio)-propyl radical   | A1_Im3_1   |
| (2-hydroperoxy-3-hydroxypropylthio)-methyl radical      | A1_Im3_2   |
| 1-hydroperoxy-2-hydroxy-3-(methylthio)-2-propyl radical | A2_Im1_1   |
| 2-hydroperoxy-1-[(methylthio)-methyl]-ethoxyl radical   | A2_Im1_2   |
| 3-hydroperoxy-2-hydroxy-1-(methylthio)-propyl radical   | A2_Im2_1   |
| 1-hydroxy-2-(methylthio)-ethyl radical                  | P2_Im1     |
| methyl thiomethylperoxyl radical                        | MSP        |
| (hydroxymethoxymethylthio)-methyl radical               | MSP-1      |
| (hydroxymethoxymethylthio)-methyl dioxyl radical        | MSP-2      |
| (hydroperoxymethylthio)-hydroxymethoxymethyl radical    | MSP-3      |
| (thio)-carbonylmethyl hydroperoxide                     | MSP-3a     |
| (thio) carbonylmethoxyl radical                         | MSP-3b     |
| (thio)-methyl hydroperoxide                             | P-Im1a     |
| 1,2λ <sup>4</sup> -oxathiiran-2-one                     | P-Im1b     |
| methylenedioxyl radical                                 | P-Im2      |
| 1,2-oxathiirane                                         | P-Im3      |
| carbothioic O-acid                                      | P-Im4      |
| Thiomethyldioxyl radical                                | P-Im5a     |
| 1,2,3-dioxathietane                                     | P-Im5b     |

A. AMS and simple molecules.

| AMS_1                                                                             |             |           |                                |             |             |           |
|-----------------------------------------------------------------------------------|-------------|-----------|--------------------------------|-------------|-------------|-----------|
| 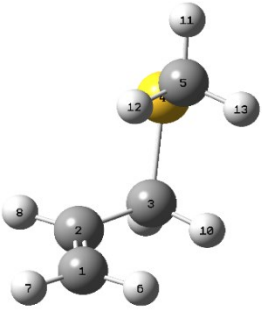 |             |           |                                |             |             |           |
| Method                                                                            | Ee          |           | E+ZPE                          | $\Delta H$  | $\Delta G$  |           |
| M06-2X/GD3/cc-pVTZ                                                                | -555.383676 |           | -555.273468                    | -555.265757 | -555.304243 |           |
| M06-2X/DG3/aug-cc-pVTZ                                                            | -555.386004 |           | -555.275839                    | -555.268135 | -555.306588 |           |
| MN15/cc-pVTZ                                                                      | -555.150612 |           | -555.040974                    | -555.033210 | -555.071805 |           |
| MN15/aug-cc-pVTZ                                                                  | -555.156155 |           | -555.046699                    | -555.038927 | -555.077554 |           |
| SVECV-f12                                                                         | -555.279005 |           | -555.168841                    | -555.161137 | -555.199590 |           |
| Coordinates (xyz)                                                                 |             |           | Vibrations (cm <sup>-1</sup> ) |             |             |           |
| C                                                                                 | -0.001633   | 0.018122  | -0.006185                      | 92.4976     | 999.9976    | 3074.8757 |
| C                                                                                 | 0.002130    | -0.001624 | 1.318673                       | 104.002     | 1042.2559   | 3128.1329 |
| C                                                                                 | 1.240370    | 0.005966  | 2.149407                       | 178.2029    | 1107.1492   | 3149.6425 |
| S                                                                                 | 1.466460    | -1.560450 | 3.053456                       | 258.7735    | 1238.7919   | 3157.601  |
| C                                                                                 | 1.740345    | -2.660918 | 1.648497                       | 313.3585    | 1253.557    | 3168.9723 |
| H                                                                                 | 0.923567    | 0.068897  | -0.568502                      | 418.7191    | 1324.2892   | 3175.3446 |
| H                                                                                 | -0.923362   | -0.009423 | -0.570817                      | 616.293     | 1353.3887   | 3248.3028 |
| H                                                                                 | -0.933508   | -0.064418 | 1.864176                       | 734.6886    | 1443.5981   |           |
| H                                                                                 | 1.190478    | 0.767964  | 2.926660                       | 783.2981    | 1468.6434   |           |
| H                                                                                 | 2.123669    | 0.194381  | 1.538717                       | 865.6934    | 1474.3424   |           |
| H                                                                                 | 1.875738    | -3.661819 | 2.050502                       | 949.8983    | 1489.0076   |           |
| H                                                                                 | 0.882871    | -2.653571 | 0.979381                       | 969.0969    | 1727.761    |           |
| H                                                                                 | 2.637683    | -2.370014 | 1.10493                        | 978.7292    | 3067.8917   |           |

**AMS\_2**

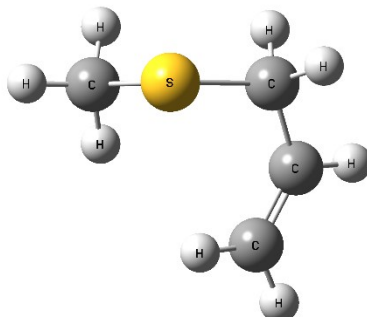

| Method                 | Ee          | E+ZPE       | $\Delta H$                     | $\Delta G$  |           |           |
|------------------------|-------------|-------------|--------------------------------|-------------|-----------|-----------|
| M06-2X/GD3/cc-pVTZ     | -555.381520 | -555.271375 | -555.263743                    | -555.301806 |           |           |
| M06-2X/DG3/aug-cc-pVTZ | -555.383787 | -555.273667 | -555.266050                    | -555.304052 |           |           |
| MN15/cc-pVTZ           | -555.149065 | -555.039346 | -555.031727                    | -555.069683 |           |           |
| MN15/aug-cc-pVTZ       | -555.154629 | -555.045029 | -555.037415                    | -555.075349 |           |           |
| SVECV-f12              | -555.276736 | -555.166616 | -555.158999                    | -555.197001 |           |           |
| Coordinates (xyz)      |             |             | Vibrations (cm <sup>-1</sup> ) |             |           |           |
| C                      | 0.006210    | -0.018046   | 0.008560                       | 113.6376    | 1011.005  | 3071.4004 |
| C                      | 0.005133    | 0.005492    | 1.330995                       | 152.8212    | 1040.2346 | 3100.3191 |
| C                      | 1.209022    | -0.007058   | 2.230692                       | 162.0531    | 1071.4215 | 3151.769  |
| S                      | 2.810864    | -0.313497   | 1.448024                       | 236.8529    | 1215.4846 | 3152.908  |
| C                      | 2.608870    | -2.067841   | 1.060880                       | 290.6119    | 1301.0063 | 3168.334  |
| H                      | 0.931856    | -0.055644   | -0.552008                      | 526.7767    | 1327.5978 | 3169.691  |
| H                      | -0.920533   | 0.010175    | -0.547314                      | 566.621     | 1354.4351 | 3255.3603 |
| H                      | -0.943924   | 0.046797    | 1.857968                       | 717.3662    | 1438.4343 |           |
| H                      | 1.069277    | -0.743013   | 3.025322                       | 755.3842    | 1451.1601 |           |
| H                      | 1.306239    | 0.961088    | 2.72557                        | 879.8988    | 1471.8425 |           |
| H                      | 3.526722    | -2.39661    | 0.579995                       | 935.9621    | 1490.8761 |           |
| H                      | 2.459661    | -2.642204   | 1.973276                       | 976.419     | 1735.1324 |           |
| H                      | 1.771906    | -2.222932   | 0.384196                       | 984.9716    | 3059.5098 |           |

**AMS\_3**

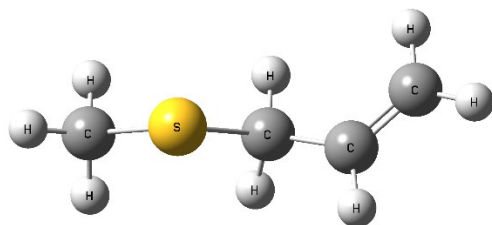

| Method                 | E <sub>e</sub> | E+ZPE       | ΔH                             | ΔG          |           |           |
|------------------------|----------------|-------------|--------------------------------|-------------|-----------|-----------|
| M06-2X/GD3/cc-pVTZ     | -555.380609    | -555.270573 | -555.262707                    | -555.301783 |           |           |
| M06-2X/DG3/aug-cc-pVTZ | -555.383080    | -555.273123 | -555.265252                    | -555.304362 |           |           |
| MN15/cc-pVTZ           | -555.147117    | -555.037669 | -555.029745                    | -555.068977 |           |           |
| MN15/aug-cc-pVTZ       | -555.152929    | -555.043607 | -555.035691                    | -555.074903 |           |           |
| SVECV-f12              | -555.276404    | -555.166446 | -555.158575                    | -555.197685 |           |           |
| Coordinates (xyz)      |                |             | Vibrations (cm <sup>-1</sup> ) |             |           |           |
| C                      | 0.012972       | -0.004374   | 0.013075                       | 64.1303     | 997.7248  | 3067.2611 |
| C                      | 0.005489       | 0.002085    | 1.336795                       | 87.1343     | 1037.1571 | 3114.8844 |
| C                      | 1.237902       | 0.004313    | 2.178981                       | 175.3865    | 1094.7821 | 3145.3977 |
| S                      | 1.342756       | -1.560992   | 3.106936                       | 201.9017    | 1226.116  | 3162.6724 |
| C                      | 2.688987       | -1.118052   | 4.227722                       | 313.5573    | 1255.8714 | 3165.8008 |
| H                      | 0.942465       | -0.003024   | -0.543395                      | 421.5961    | 1325.4516 | 3176.3456 |
| H                      | -0.905847      | -0.011254   | -0.556671                      | 607.7776    | 1351.9965 | 3252.3813 |
| H                      | -0.936890      | -0.013557   | 1.873954                       | 741.5249    | 1448.7566 |           |
| H                      | 1.201644       | 0.814422    | 2.909334                       | 800.2421    | 1473.2901 |           |
| H                      | 2.129073       | 0.122555    | 1.56318                        | 893.0483    | 1484.8283 |           |
| H                      | 2.881008       | -1.981983   | 4.859046                       | 949.0202    | 1488.0099 |           |
| H                      | 3.592457       | -0.879425   | 3.669866                       | 972.8778    | 1734.7719 |           |
| H                      | 2.406754       | -0.274562   | 4.854994                       | 973.9316    | 3060.1302 |           |



| OH                                                                                |            |            |                                |            |
|-----------------------------------------------------------------------------------|------------|------------|--------------------------------|------------|
| 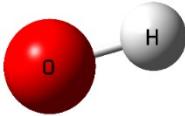 |            |            |                                |            |
| Method                                                                            | Ee         | E+ZPE      | $\Delta H$                     | $\Delta G$ |
| M06-2X/GD3/cc-pVTZ                                                                | -75.730486 | -75.721884 | -75.718580                     | -75.738804 |
| M06-2X/DG3/aug-cc-pVTZ                                                            | -75.733810 | -75.725222 | -75.721918                     | -75.742143 |
| MN15/cc-pVTZ                                                                      | -75.683738 | -75.675135 | -75.671830                     | -75.692061 |
| MN15/aug-cc-pVTZ                                                                  | -75.687249 | -75.678673 | -75.675368                     | -75.695600 |
| SVECV-f12                                                                         | -75.726817 | -75.718229 | -75.714925                     | -75.735150 |
| Coordinates (xyz)                                                                 |            |            | Vibrations (cm <sup>-1</sup> ) |            |
| O                                                                                 | 0.000000   | 0.000000   | 0.106696                       | 3769.6136  |
| H                                                                                 | 0.000000   | 0.000000   | -0.865234                      |            |

| O <sub>2</sub>                                                                      |             |             |                                |             |
|-------------------------------------------------------------------------------------|-------------|-------------|--------------------------------|-------------|
| 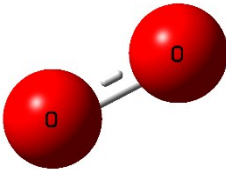 |             |             |                                |             |
| Method                                                                              | Ee          | E+ZPE       | $\Delta H$                     | $\Delta G$  |
| M06-2X/GD3/cc-pVTZ                                                                  | -150.321735 | -150.317729 | -150.314423                    | -150.337669 |
| M06-2X/DG3/aug-cc-pVTZ                                                              | -150.324795 | -150.320798 | -150.317492                    | -150.340738 |
| MN15/cc-pVTZ                                                                        | -150.225415 | -150.221486 | -150.218179                    | -150.241435 |
| MN15/aug-cc-pVTZ                                                                    | -150.228786 | -150.224861 | -150.221554                    | -150.244810 |
| SVECV-f12                                                                           | -150.303405 | -150.299408 | -150.296102                    | -150.319348 |
| Coordinates (xyz)                                                                   |             |             | Vibrations (cm <sup>-1</sup> ) |             |
| O                                                                                   | 0.000000    | 0.000000    | 0.000000                       | 1754.4579   |
| O                                                                                   | 0.000000    | 0.000000    | 1.189850                       |             |

| <b>_OOH</b>                                                                       |           |          |             |                                |             |             |
|-----------------------------------------------------------------------------------|-----------|----------|-------------|--------------------------------|-------------|-------------|
| 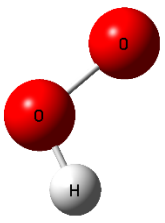 |           |          |             |                                |             |             |
| Method                                                                            |           |          | Ee          | E+ZPE                          | $\Delta H$  | $\Delta G$  |
| M06-2X/GD3/cc-pVTZ                                                                |           |          | -150.904167 | -150.889552                    | -150.885756 | -150.911696 |
| M06-2X/DG3/aug-cc-pVTZ                                                            |           |          | -150.908095 | -150.893517                    | -150.889721 | -150.915660 |
| MN15/cc-pVTZ                                                                      |           |          | -150.814457 | -150.799939                    | -150.796141 | -150.822090 |
| MN15/aug-cc-pVTZ                                                                  |           |          | -150.818537 | -150.804066                    | -150.800268 | -150.826216 |
| SVECV-f12                                                                         |           |          | -150.890724 | -150.876146                    | -150.872350 | -150.898289 |
| Coordinates (xyz)                                                                 |           |          |             | Vibrations (cm <sup>-1</sup> ) |             |             |
| O                                                                                 | 0.017219  | 0.000000 | -0.019469   | 1252.762                       |             |             |
| O                                                                                 | -0.030895 | 0.000000 | 1.287852    | 1459.4343                      |             |             |
| H                                                                                 | 0.894501  | 0.000000 | 1.587493    | 3686.8681                      |             |             |

| <b>NO<sub>2</sub></b>                                                               |           |          |             |                                |             |             |
|-------------------------------------------------------------------------------------|-----------|----------|-------------|--------------------------------|-------------|-------------|
| 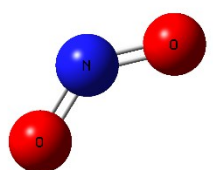 |           |          |             |                                |             |             |
| Method                                                                              |           |          | Ee          | E+ZPE                          | $\Delta H$  | $\Delta G$  |
| M06-2X/GD3/cc-pVTZ                                                                  |           |          | -205.070765 | -205.061555                    | -205.057688 | -205.084869 |
| M06-2X/DG3/aug-cc-pVTZ                                                              |           |          | -205.074636 | -205.065465                    | -205.061598 | -205.089431 |
| MN15/cc-pVTZ                                                                        |           |          | -204.938870 | -204.929761                    | -204.925887 | -204.953748 |
| MN15/aug-cc-pVTZ                                                                    |           |          | -204.943091 | -204.934013                    | -204.930139 | -204.957997 |
| SVECV-f12                                                                           |           |          | -205.051490 | -205.042319                    | -205.038452 | -205.066286 |
| Coordinates (xyz)                                                                   |           |          |             | Vibrations (cm <sup>-1</sup> ) |             |             |
| N                                                                                   | 0.096272  | 0.000000 | 0.055593    | 783.4383                       |             |             |
| O                                                                                   | -0.057361 | 0.000000 | 1.225779    | 1465.8194                      |             |             |
| O                                                                                   | 1.032883  | 0.000000 | -0.662572   | 1776.1539                      |             |             |

**NO<sub>3</sub>**

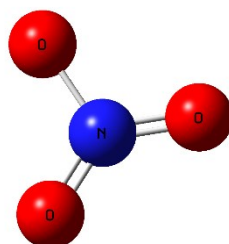

| Method                 | Ee          | E+ZPE       | ΔH          | ΔG                             |           |
|------------------------|-------------|-------------|-------------|--------------------------------|-----------|
| M06-2X/GD3/cc-pVTZ     | -280.208273 | -280.195218 | -280.190763 | -280.221538                    |           |
| M06-2X/DG3/aug-cc-pVTZ | -280.213675 | -280.200605 | -280.196178 | -280.226895                    |           |
| MN15/cc-pVTZ           | -280.035793 | -280.023933 | -280.019361 | -280.050263                    |           |
| MN15/aug-cc-pVTZ       | -280.041539 | -280.029865 | -280.025232 | -280.056256                    |           |
| SVECV-f12              | -280.182839 | -280.169769 | -280.165342 | -280.196059                    |           |
| Coordinates (xyz)      |             |             |             | Vibrations (cm <sup>-1</sup> ) |           |
| N                      | 0.046566    | 0           | 0.027307    | 332.011                        | 1377.8004 |
| O                      | -0.07377    | 0           | 1.214024    | 677.8461                       | 1669.4979 |
| O                      | 1.020022    | 0           | -0.662005   | 816.1297                       |           |
| O                      | -1.098819   | 0           | -0.640526   | 863.8924                       |           |

B. Products (P)

| P1                                                                                |           |           |              |                                |              |              |
|-----------------------------------------------------------------------------------|-----------|-----------|--------------|--------------------------------|--------------|--------------|
| 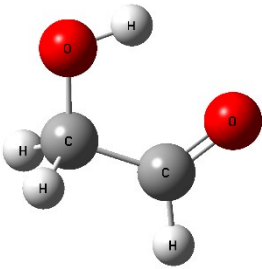 |           |           |              |                                |              |              |
| Method                                                                            |           |           | Ee           | E+ZPE                          | $\Delta H$   | $\Delta G$   |
| M06-2X/GD3/cc-pVTZ                                                                |           |           | -229.040609  | -228.97865                     | -228.973261  | -229.005219  |
| M06-2X/DG3/aug-cc-pVTZ                                                            |           |           | -229.04574   | -228.983824                    | -228.978448  | -229.010378  |
| MN15/cc-pVTZ                                                                      |           |           | -228.883092  | -228.821423                    | -228.816091  | -228.847915  |
| MN15/aug-cc-pVTZ                                                                  |           |           | -228.889409  | -228.827891                    | -228.822549  | -228.85439   |
| SVECV-f12                                                                         |           |           | -229.0184336 | -228.9565176                   | -228.9511416 | -228.9830716 |
| Coordinates (xyz)                                                                 |           |           |              | Vibrations (cm <sup>-1</sup> ) |              |              |
| C                                                                                 | -0.031047 | -0.008823 | -0.043160    | 217.4757                       | 1265.5261    | 3043.7897    |
| H                                                                                 | -0.018764 | 0.028708  | 1.053348     | 301.6945                       | 1306.6404    | 3781.1445    |
| H                                                                                 | 1.013937  | 0.054777  | -0.371594    | 393.1325                       | 1400.9188    |              |
| O                                                                                 | -0.632539 | -1.178372 | -0.500453    | 729.6279                       | 1445.486     |              |
| H                                                                                 | -1.388216 | -0.914981 | -1.042794    | 771.6247                       | 1485.3511    |              |
| C                                                                                 | -0.740007 | 1.221396  | -0.53441     | 885.4352                       | 1853.0833    |              |
| H                                                                                 | -0.324647 | 2.192263  | -0.215268    | 1117.5118                      | 2988.8341    |              |
| O                                                                                 | -1.710678 | 1.155417  | -1.239282    | 1167.0425                      | 3023.7816    |              |

**P1'**

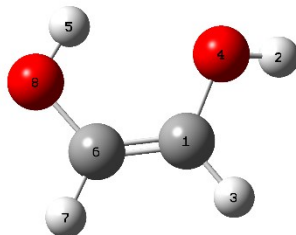

| Method                 | Ee           | E+ZPE        | $\Delta H$                     | $\Delta G$   |           |           |
|------------------------|--------------|--------------|--------------------------------|--------------|-----------|-----------|
| M06-2X/GD3/cc-pVTZ     | -229.030318  | -228.96784   | -228.96228                     | -228.994522  |           |           |
| M06-2X/DG3/aug-cc-pVTZ | -229.036294  | -228.973972  | -228.968326                    | -229.000786  |           |           |
| MN15/cc-pVTZ           | -228.874395  | -228.812268  | -228.806667                    | -228.83899   |           |           |
| MN15/aug-cc-pVTZ       | -228.881557  | -228.819683  | -228.813942                    | -228.846694  |           |           |
| SVECV-f12              | -229.0070739 | -228.9447519 | -228.9391059                   | -228.9715659 |           |           |
| Coordinates (xyz)      |              |              | Vibrations (cm <sup>-1</sup> ) |              |           |           |
| C                      | -0.014246    | 0.025940     | 0.011264                       | 168.0979     | 1133.2435 | 3829.1832 |
| H                      | 0.083879     | -0.096521    | 1.938551                       | 253.2623     | 1196.2215 | 3908.5978 |
| H                      | 1.056872     | 0.034074     | -0.119490                      | 457.8197     | 1276.3663 |           |
| O                      | -0.526592    | -0.33678     | 1.239755                       | 557.7217     | 1366.6035 |           |
| H                      | -2.413673    | 0.042615     | 0.06985                        | 740.5899     | 1432.0207 |           |
| C                      | -0.855625    | 0.287128     | -0.977628                      | 768.9088     | 1789.5954 |           |
| H                      | -0.515209    | 0.526585     | -1.97203                       | 918.363      | 3236.164  |           |
| O                      | -2.206543    | 0.264248     | -0.845654                      | 1056.2917    | 3267.1968 |           |

**P2**

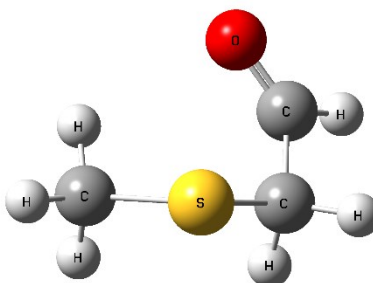

| Method                 | Ee          | E+ZPE       | $\Delta H$                     | $\Delta G$  |           |           |
|------------------------|-------------|-------------|--------------------------------|-------------|-----------|-----------|
| M06-2X/GD3/cc-pVTZ     | -591.313675 | -591.227722 | -591.220331                    | -591.258060 |           |           |
| M06-2X/DG3/aug-cc-pVTZ | -591.317055 | -591.231159 | -591.223756                    | -591.261521 |           |           |
| MN15/cc-pVTZ           | -591.068061 | -590.982535 | -590.975115                    | -591.012894 |           |           |
| MN15/aug-cc-pVTZ       | -591.074322 | -590.988926 | -590.981499                    | -591.019299 |           |           |
| SVECV-f12              | -591.203094 | -591.117198 | -591.109795                    | -591.147561 |           |           |
| Coordinates (xyz)      |             |             | Vibrations (cm <sup>-1</sup> ) |             |           |           |
| C                      | 0.037108    | -0.033394   | -0.023807                      | 107.3317    | 980.8841  | 3047.4089 |
| C                      | 0.101466    | 0.064799    | 1.481388                       | 142.4702    | 1045.9156 | 3075.3981 |
| S                      | 1.730530    | -0.095148   | 2.224941                       | 183.074     | 1222.9174 | 3101.7462 |
| C                      | 2.511300    | 1.391055    | 1.552962                       | 212.0087    | 1291.3647 | 3159.734  |
| H                      | -0.526950   | -0.727346   | 1.894413                       | 279.4299    | 1350.8651 | 3181.3593 |
| H                      | -0.372951   | 1.007938    | 1.771054                       | 630.4509    | 1413.5913 |           |
| H                      | 3.496692    | 1.455458    | 2.007419                       | 677.5848    | 1421.4725 |           |
| H                      | 2.611009    | 1.314387    | 0.474498                       | 732.2782    | 1470.4977 |           |
| H                      | 1.939598    | 2.276616    | 1.825115                       | 776.3466    | 1494.6988 |           |
| H                      | -0.99046    | 0.036426    | -0.43247                       | 941.1035    | 1868.0534 |           |
| O                      | 0.975655    | -0.159569   | -0.755512                      | 961.6016    | 2934.2304 |           |

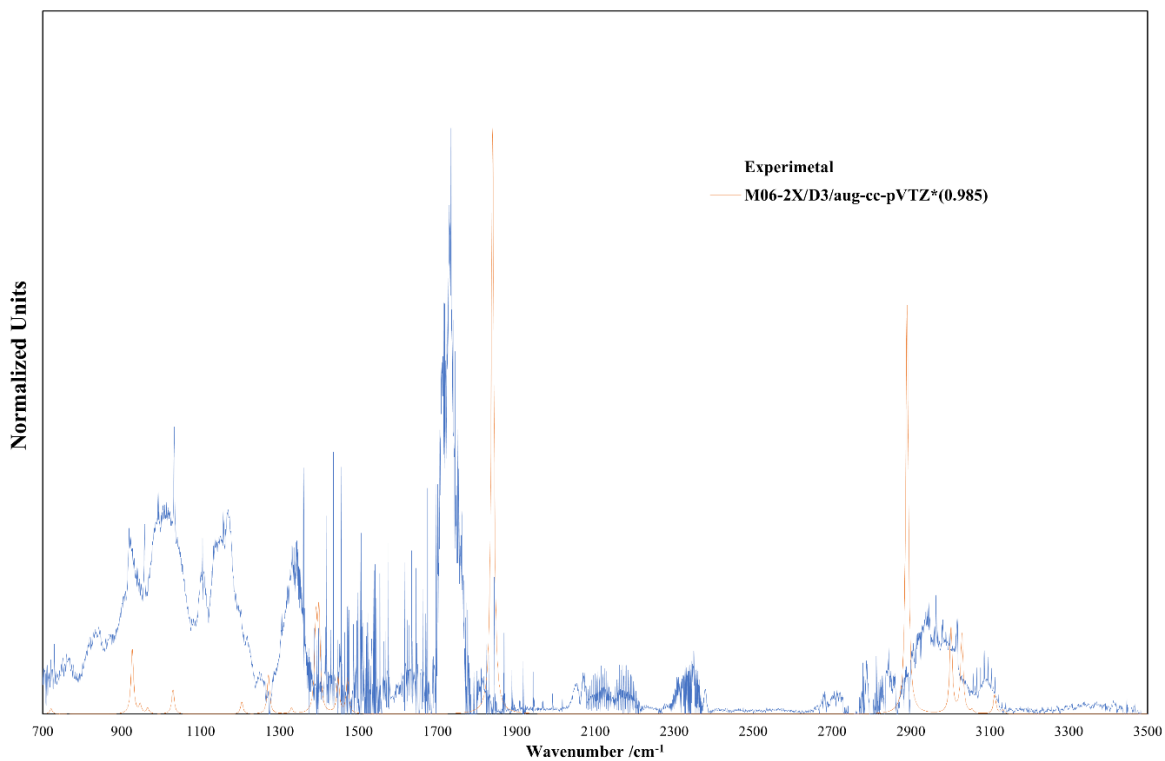

Figure S 2. Comparison between experimental and theoretical IR spectra of 2-methyl thioacetaldehyde (**P2**) calculated at the M06-2X/GD3/aug-cc-pVTZ level of theory (scaled by 0.985).

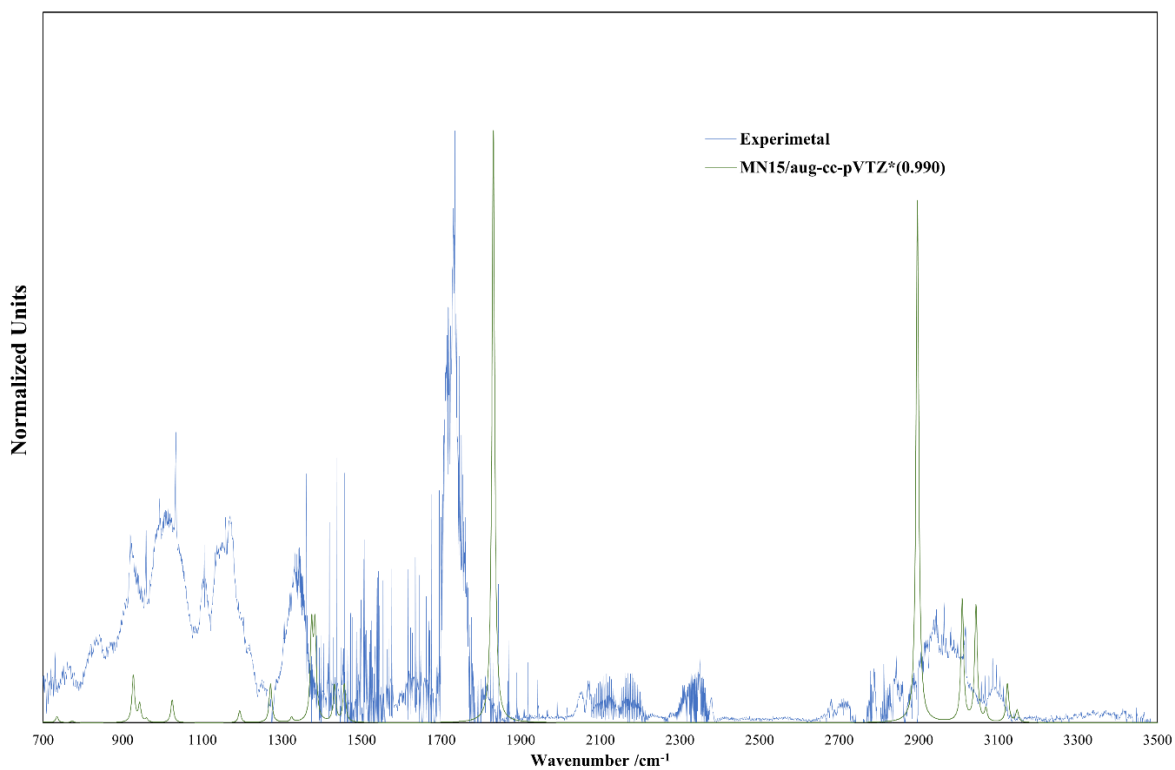

Figure S 3. Comparison between experimental and theoretical IR spectra of 2-methyl thioacetaldehyde (**P2**) calculated at the MN15/aug-cc-pVTZ level of theory (scaled by 0.990).

**P3**

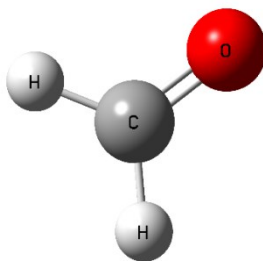

| Method                   | Ee           |           |          | E+ZPE                               | $\Delta H$   | $\Delta G$   |
|--------------------------|--------------|-----------|----------|-------------------------------------|--------------|--------------|
| M06-2X/GD3/cc-pVTZ       | -114.496616  |           |          | -114.469571                         | -114.465762  | -114.491216  |
| M06-2X/DG3/aug-cc-pVTZ   | -114.498971  |           |          | -114.471958                         | -114.468148  | -114.492949  |
| MN15/cc-pVTZ             | -114.417742  |           |          | -114.390864                         | -114.387052  | -114.412514  |
| MN15/aug-cc-pVTZ         | -114.420636  |           |          | -114.393807                         | -114.389994  | -114.414804  |
| SVECV-f12                | -114.4872821 |           |          | -114.4602691                        | -114.4564591 | -114.4812601 |
| <b>Coordinates (xyz)</b> |              |           |          | <b>Vibrations (cm<sup>-1</sup>)</b> |              |              |
| C                        | -0.725883    | -0.088050 | 0.000000 | 1213.5626                           | 2945.4693    |              |
| H                        | -0.203116    | -1.059481 | 0.000000 | 1273.4858                           | 3015.7189    |              |
| H                        | -1.828540    | -0.121380 | 0.000000 | 1539.8781                           |              |              |
| O                        | -0.128035    | 0.947827  | 0.000000 | 1869.1147                           |              |              |



**P4**

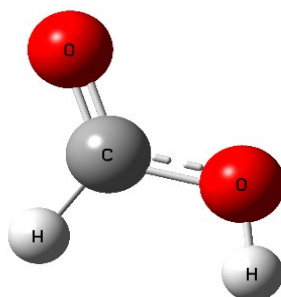

| Method/Base            | Ee           | E+ZPE        | $\Delta H$                     | $\Delta G$   |           |
|------------------------|--------------|--------------|--------------------------------|--------------|-----------|
| M06-2X/GD3/cc-pVTZ     | -189.758341  | -189.724279  | -189.720099                    | -189.748345  |           |
| M06-2X/DG3/aug-cc-pVTZ | -189.762579  | -189.7286    | -189.72442                     | -189.752668  |           |
| MN15/cc-pVTZ           | -189.634074  | -189.600274  | -189.59608                     | -189.624351  |           |
| MN15/aug-cc-pVTZ       | -189.638946  | -189.60524   | -189.601047                    | -189.629316  |           |
| SVECV-f12              | -189.7389772 | -189.7049972 | -189.7008172                   | -189.7290662 |           |
| Coordinates (xyz)      |              |              | Vibrations (cm <sup>-1</sup> ) |              |           |
| C                      | -0.017950    | 0.000000     | -0.009380                      | 519.0422     | 1431.3763 |
| O                      | -0.001516    | 0            | 1.335139                       | 673.8219     | 1911.408  |
| O                      | 0.975801     | 0            | -0.657857                      | 1058.0938    | 3026.8633 |
| H                      | -1.030572    | 0            | -0.440829                      | 1140.6833    | 3865.7675 |
| H                      | -0.898734    | 0.000000     | 1.683251                       | 1288.1358    |           |

**P5**

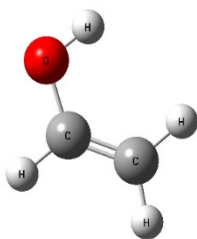

| Method                 |           | Ee           | E+ZPE        | $\Delta H$                     | $\Delta G$   |           |
|------------------------|-----------|--------------|--------------|--------------------------------|--------------|-----------|
| M06-2X/GD3/cc-pVTZ     |           | -153.805133  | -153.747969  | -153.743424                    | -153.772396  |           |
| M06-2X/DG3/aug-cc-pVTZ |           | -153.808177  | -153.751075  | -153.746526                    | -153.775506  |           |
| MN15/cc-pVTZ           |           | -153.693929  | -153.637085  | -153.632508                    | -153.661528  |           |
| MN15/aug-cc-pVTZ       |           | -153.69796   | -153.641201  | -153.636623                    | -153.665648  |           |
| SVECV-f12              |           | -153.8052193 | -153.7492653 | -153.7444353                   | -153.7741903 |           |
| Coordinates (xyz)      |           |              |              | Vibrations (cm <sup>-1</sup> ) |              |           |
| C                      | -0.010778 | 0.038119     | 0.022072     | 458.1265                       | 1329.2061    | 3856.4518 |
| C                      | 0.011703  | -0.088032    | 1.340026     | 496.7739                       | 1354.5662    |           |
| H                      | 0.892951  | 0.149563     | 1.922308     | 723.5819                       | 1449.0658    |           |
| H                      | -0.865732 | -0.435982    | 1.860716     | 864.0791                       | 1732.1096    |           |
| H                      | 1.775246  | 0.66295      | -0.22205     | 967.9914                       | 3177.1252    |           |
| H                      | -0.884684 | -0.195745    | -0.570823    | 1018.643                       | 3218.7795    |           |
| O                      | 1.008178  | 0.461002     | -0.766739    | 1137.1648                      | 3280.6649    |           |

**P5'**

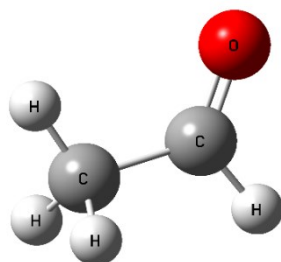

| Method                 | Ee           | E+ZPE        | $\Delta H$                     | $\Delta G$   |           |           |
|------------------------|--------------|--------------|--------------------------------|--------------|-----------|-----------|
| M06-2X/GD3/cc-pVTZ     | -153.818126  | -153.762145  | -153.757316                    | -153.78707   |           |           |
| M06-2X/DG3/aug-cc-pVTZ | -153.820805  | -153.76485   | -153.76002                     | -153.789775  |           |           |
| MN15/cc-pVTZ           | -153.705867  | -153.650214  | -153.645372                    | -153.675133  |           |           |
| MN15/aug-cc-pVTZ       | -153.709414  | -153.653852  | -153.649004                    | -153.678777  |           |           |
| SVECV-f12              | -153.8052193 | -153.7492653 | -153.7444353                   | -153.7741903 |           |           |
| Coordinates (xyz)      |              |              | Vibrations (cm <sup>-1</sup> ) |              |           |           |
| O                      | 0.009342     | 0.016897     | 0.002236                       | 157.7096     | 1430.1129 | 3179.8869 |
| C                      | -0.003091    | -0.000861    | 1.201899                       | 513.5302     | 1464.924  |           |
| C                      | 1.224611     | -0.000044    | 2.061508                       | 775.7494     | 1474.8385 |           |
| H                      | -0.967056    | -0.019408    | 1.74591                        | 900.8864     | 1866.0199 |           |
| H                      | 1.220155     | -0.886443    | 2.69827                        | 1138.3645    | 2944.7846 |           |
| H                      | 2.120622     | 0.018785     | 1.447635                       | 1145.7648    | 3062.972  |           |
| H                      | 1.200954     | 0.866962     | 2.724026                       | 1380.5524    | 3125.2017 |           |

**P6**

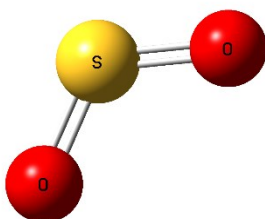

| Method                 | Ee           | E+ZPE        | $\Delta H$                     | $\Delta G$   |
|------------------------|--------------|--------------|--------------------------------|--------------|
| M06-2X/GD3/cc-pVTZ     | -548.614765  | -548.607451  | -548.603456                    | -548.63161   |
| M06-2X/DG3/aug-cc-pVTZ | -548.619472  | -548.612207  | -548.608209                    | -548.636369  |
| MN15/cc-pVTZ           | -548.426317  | -548.418985  | -548.41499                     | -548.443794  |
| MN15/aug-cc-pVTZ       | -548.432575  | -548.425292  | -548.421295                    | -548.44945   |
| SVECV-f12              | -549.0987169 | -549.0914519 | -549.0874539                   | -549.1156129 |
| Coordinates (xyz)      |              |              | Vibrations (cm <sup>-1</sup> ) |              |
| O                      | -0.262602    | 0.000000     | -0.178041                      | 535.2882     |
| S                      | 0.084560     | 0.000000     | 1.215440                       | 1234.4605    |
| O                      | 1.478041     | 0.000000     | 1.562602                       | 1419.2867    |

**P7**

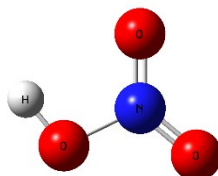

| Method                 | Ee           | E+ZPE        | $\Delta H$   | $\Delta G$                     |           |
|------------------------|--------------|--------------|--------------|--------------------------------|-----------|
| M06-2X/GD3/cc-pVTZ     | -280.891715  | -280.864226  | -280.85985   | -280.889893                    |           |
| M06-2X/DG3/aug-cc-pVTZ | -280.897333  | -280.869981  | -280.865598  | -280.895652                    |           |
| MN15/cc-pVTZ           | -280.715325  | -280.68819   | -280.683777  | -280.713879                    |           |
| MN15/aug-cc-pVTZ       | -280.721435  | -280.69443   | -280.690013  | -280.720122                    |           |
| SVECV-f12              | -280.8641479 | -280.8367959 | -280.8324129 | -280.8624659                   |           |
| Coordinates (xyz)      |              |              |              | Vibrations (cm <sup>-1</sup> ) |           |
| H                      | 0.018848     | 0.016258     | 0.021556     | 506.1591                       | 1358.7488 |
| O                      | -0.005191    | -0.004839    | 2.155606     | 621.5287                       | 1415.7078 |
| N                      | 1.046545     | -0.00338     | 1.575598     | 706.1928                       | 1808.6919 |
| O                      | 2.151719     | -0.012163    | 2.004871     | 825.2425                       | 3781.4187 |
| O                      | 0.972309     | 0.010602     | 0.19838      | 982.6155                       |           |

P8

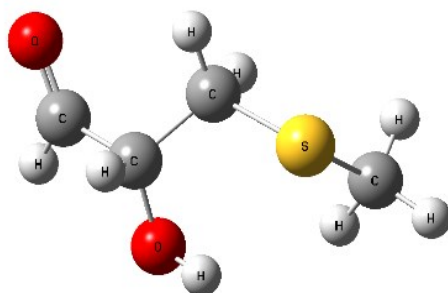

| Method                 | Ee          | E+ZPE       | $\Delta H$                     | $\Delta G$  |          |          |
|------------------------|-------------|-------------|--------------------------------|-------------|----------|----------|
| M06-2X/GD3/cc-pVTZ     | -705.847948 | -705.728288 | -705.718474                    | -705.762901 |          |          |
| M06-2X/DG3/aug-cc-pVTZ | -705.853707 | -705.734216 | -705.724333                    | -705.769158 |          |          |
| MN15/cc-pVTZ           | -705.523128 | -705.404134 | -705.394314                    | -705.438631 |          |          |
| MN15/aug-cc-pVTZ       | -705.532503 | -705.413749 | -705.403863                    | -705.448580 |          |          |
| Coordinates (xyz)      |             |             | Vibrations (cm <sup>-1</sup> ) |             |          |          |
| C                      | -0.031390   | 0.083501    | 0.010452                       | 40.324      | 981.350  | 1866.364 |
| C                      | -0.001786   | -0.023482   | 1.522010                       | 79.572      | 985.351  | 2977.759 |
| C                      | 1.442083    | -0.043186   | 2.020213                       | 80.094      | 1043.211 | 3022.852 |
| S                      | 1.540312    | -0.326705   | 3.812488                       | 159.493     | 1065.937 | 3075.020 |
| C                      | 1.912320    | -2.100710   | 3.827348                       | 186.320     | 1163.213 | 3090.791 |
| H                      | -0.497770   | 0.872296    | 1.915837                       | 246.079     | 1218.946 | 3155.735 |
| H                      | 1.914029    | 0.909292    | 1.790819                       | 290.392     | 1239.443 | 3159.992 |
| H                      | 2.006355    | -0.830632   | 1.520964                       | 411.132     | 1261.773 | 3171.069 |
| H                      | 1.918443    | -2.413662   | 4.868475                       | 430.487     | 1354.200 | 3827.551 |
| H                      | 1.157971    | -2.663985   | 3.283675                       | 458.736     | 1360.333 |          |
| H                      | 2.893644    | -2.281693   | 3.395033                       | 588.044     | 1384.910 |          |
| O                      | -0.719989   | -1.183313   | 1.866558                       | 726.119     | 1425.937 |          |
| H                      | -0.749071   | -1.229085   | 2.828717                       | 761.031     | 1459.701 |          |
| H                      | -0.680569   | -0.654356   | -0.494983                      | 843.825     | 1474.232 |          |
| O                      | 0.600428    | 0.900972    | -0.596880                      | 887.759     | 1495.210 |          |

P9

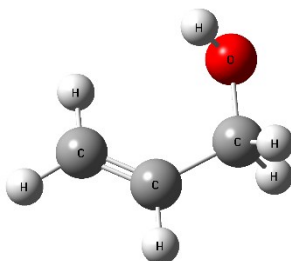

| Method                 | E <sub>e</sub> | E+ZPE       | ΔH          | ΔG                             |           |           |
|------------------------|----------------|-------------|-------------|--------------------------------|-----------|-----------|
| M06-2X/GD3/cc-pVTZ     | -193.104659    | -193.018552 | -193.012844 | -193.045359                    |           |           |
| M06-2X/DG3/aug-cc-pVTZ | -193.108118    | -193.022198 | -193.016446 | -193.049052                    |           |           |
| MN15/cc-pVTZ           | -192.959172    | -192.873646 | -192.867871 | -192.900504                    |           |           |
| MN15/aug-cc-pVTZ       | -192.964295    | -192.878955 | -192.873152 | -192.905845                    |           |           |
| SVECV-f12              | -193.374516    | -193.288596 | -193.282844 | -193.315450                    |           |           |
| Coordinates (xyz)      |                |             |             | Vibrations (cm <sup>-1</sup> ) |           |           |
| C                      | -0.018952      | -0.005166   | 0.001486    | 196.9399                       | 1159.5468 | 3165.8129 |
| C                      | 0.014190       | 0.033897    | 1.499892    | 293.9888                       | 1220.4702 | 3177.4295 |
| C                      | 1.113321       | -0.030676   | 2.233907    | 323.0222                       | 1318.4794 | 3257.8497 |
| H                      | -0.374998      | 0.953441    | -0.381205   | 579.8972                       | 1374.3833 | 3865.4876 |
| H                      | -0.746708      | -0.759295   | -0.320829   | 618.8155                       | 1419.2892 |           |
| H                      | 1.068829       | -0.006218   | 3.313466    | 903.5955                       | 1449.4864 |           |
| H                      | 2.092281       | -0.091564   | 1.776205    | 968.6929                       | 1500.8568 |           |
| O                      | 1.235603       | -0.225512   | -0.60006    | 1000.1051                      | 1736.2174 |           |
| H                      | 1.583412       | -1.06296    | -0.281847   | 1026.8377                      | 3021.5943 |           |
| H                      | -0.955479      | 0.115620    | 1.980735    | 1048.7245                      | 3086.9964 |           |

**P10**

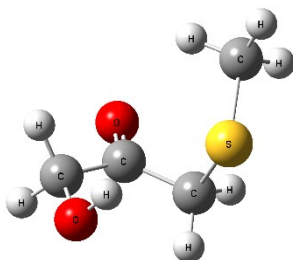

| <b>P10</b>               |           |           |             |                                     |                              |                              |
|--------------------------|-----------|-----------|-------------|-------------------------------------|------------------------------|------------------------------|
|                          |           |           |             |                                     |                              |                              |
| <b>Method</b>            |           |           | <b>Ee</b>   | <b>E+ZPE</b>                        | <b><math>\Delta H</math></b> | <b><math>\Delta G</math></b> |
| M06-2X/GD3/cc-pVTZ       |           |           | -705.857618 | -705.737052                         | -705.727449                  | -705.771067                  |
| M06-2X/DG3/aug-cc-pVTZ   |           |           | -705.863611 | -705.743268                         | -705.733576                  | -705.777576                  |
| MN15/cc-pVTZ             |           |           | -705.532523 | -705.412704                         | -705.403002                  | -705.446903                  |
| MN15/aug-cc-pVTZ         |           |           | -705.542190 | -705.422617                         | -705.412864                  | -705.457165                  |
| <b>Coordinates (xyz)</b> |           |           |             | <b>Vibrations (cm<sup>-1</sup>)</b> |                              |                              |
| C                        | -0.109557 | -0.275938 | 0.344779    | 48.171                              | 954.887                      | 1832.415                     |
| C                        | 0.238689  | 0.654984  | 1.499442    | 96.570                              | 984.921                      | 3056.577                     |
| C                        | 1.593605  | 0.515229  | 2.141096    | 102.519                             | 1022.824                     | 3078.329                     |
| S                        | 1.562118  | -0.998393 | 3.153275    | 149.986                             | 1131.495                     | 3105.585                     |
| C                        | 0.325830  | -0.512904 | 4.381417    | 173.259                             | 1141.660                     | 3115.206                     |
| H                        | -0.308462 | 0.358476  | -0.519843   | 272.197                             | 1205.670                     | 3165.397                     |
| H                        | -1.049494 | -0.773817 | 0.599621    | 304.993                             | 1241.786                     | 3174.264                     |
| H                        | 2.374903  | 0.359341  | 1.400980    | 432.063                             | 1284.918                     | 3175.815                     |
| H                        | 0.206355  | -1.361403 | 5.050193    | 488.722                             | 1361.111                     | 3835.080                     |
| H                        | 0.678808  | 0.346907  | 4.945864    | 513.143                             | 1367.777                     |                              |
| H                        | -0.627097 | -0.279645 | 3.913008    | 574.328                             | 1404.152                     |                              |
| H                        | 1.013626  | -1.815822 | 0.691912    | 709.910                             | 1447.940                     |                              |
| O                        | 0.901522  | -1.179062 | -0.021705   | 754.596                             | 1469.753                     |                              |
| H                        | 1.804764  | 1.381542  | 2.762802    | 799.394                             | 1472.845                     |                              |
| O                        | -0.581951 | 1.436148  | 1.912479    | 889.873                             | 1484.489                     |                              |



**P11**

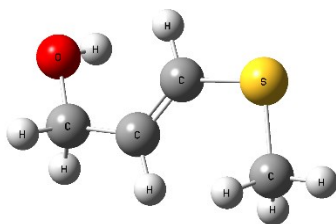

| Method                 | Ee          | E+ZPE       | $\Delta H$                     | $\Delta G$  |          |          |
|------------------------|-------------|-------------|--------------------------------|-------------|----------|----------|
| M06-2X/GD3/cc-pVTZ     | -630.609130 | -630.493248 | -630.484656                    | -630.525303 |          |          |
| M06-2X/DG3/aug-cc-pVTZ | -630.613579 | -630.497805 | -630.489204                    | -630.529845 |          |          |
| MN15/cc-pVTZ           | -630.330770 | -630.215407 | -630.206803                    | -630.247431 |          |          |
| MN15/aug-cc-pVTZ       | -630.339088 | -630.223907 | -630.215297                    | -630.255930 |          |          |
| SVECV-f12              | -631.271887 | -631.156113 | -631.147512                    | -631.188153 |          |          |
| Coordinates (xyz)      |             |             | Vibrations (cm <sup>-1</sup> ) |             |          |          |
| C                      | 0.003759    | -0.003039   | 0.062775                       | 74.944      | 989.221  | 3023.221 |
| C                      | 0.052128    | 0.202073    | 1.551449                       | 173.721     | 994.010  | 3068.971 |
| C                      | 1.137044    | -0.021270   | 2.283926                       | 196.594     | 1001.424 | 3084.255 |
| S                      | 1.342766    | 0.165841    | 4.009300                       | 223.127     | 1148.957 | 3148.978 |
| C                      | -0.288473   | 0.741888    | 4.505299                       | 238.102     | 1209.578 | 3173.577 |
| H                      | -0.066848   | 0.962006    | -0.443037                      | 270.625     | 1257.846 | 3191.484 |
| H                      | -0.904988   | -0.558979   | -0.194390                      | 332.742     | 1320.756 | 3194.241 |
| H                      | 2.050805    | -0.353078   | 1.805140                       | 411.805     | 1351.706 | 3866.322 |
| H                      | -0.252791   | 0.885905    | 5.581710                       | 597.537     | 1378.307 |          |
| H                      | -0.524772   | 1.687831    | 4.021758                       | 741.946     | 1414.176 |          |
| H                      | -1.047245   | -0.0006     | 4.265091                       | 774.193     | 1472.889 |          |
| H                      | 1.210729    | -1.516172   | -0.093648                      | 860.133     | 1489.629 |          |
| O                      | 1.145954    | -0.634673   | -0.470983                      | 958.024     | 1506.934 |          |
| H                      | -0.868183   | 0.554158    | 2.002143                       | 970.799     | 1708.024 |          |

**P12**

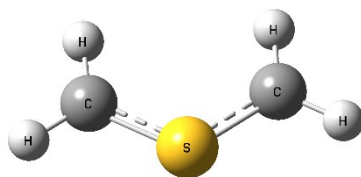

| Method                 | Ee           | E+ZPE        | $\Delta H$                     | $\Delta G$   |           |           |
|------------------------|--------------|--------------|--------------------------------|--------------|-----------|-----------|
| M06-2X/GD3/cc-pVTZ     | -476.706236  | -476.654931  | -476.649857                    | -476.679935  |           |           |
| M06-2X/DG3/aug-cc-pVTZ | -476.708399  | -476.657126  | -476.652055                    | -476.682781  |           |           |
| MN15/cc-pVTZ           | -476.543034  | -476.491855  | -476.486774                    | -476.51751   |           |           |
| MN15/aug-cc-pVTZ       | -476.547606  | -476.496344  | -476.491294                    | -476.52198   |           |           |
| SVECV-f12              | -477.1772726 | -477.1259996 | -477.1209286                   | -477.1516546 |           |           |
| Coordinates (xyz)      |              |              | Vibrations (cm <sup>-1</sup> ) |              |           |           |
| S                      | 0.120133     | -0.069140    | 0.098002                       | 345.2366     | 1040.8635 | 3327.1833 |
| C                      | 0.019391     | -0.082305    | 1.715402                       | 400.0121     | 1122.2984 |           |
| H                      | 0.774574     | -0.518905    | 2.348287                       | 583.4919     | 1405.3464 |           |
| C                      | 1.448014     | -0.765211    | -0.517211                      | 616.1545     | 1434.9717 |           |
| H                      | 2.216983     | -1.208128    | 0.09434                        | 663.5194     | 3202.2083 |           |
| H                      | -0.861657    | 0.379151     | 2.125227                       | 880.8866     | 3202.8382 |           |
| H                      | 1.516306     | -0.757165    | -1.590714                      | 955.8397     | 3325.4666 |           |

**P13**

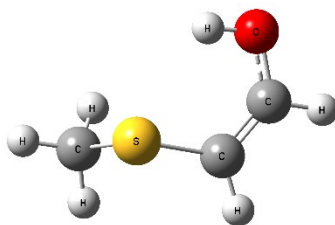

| Method                 |           | Ee          | E+ZPE       | $\Delta H$                     | $\Delta G$  |           |
|------------------------|-----------|-------------|-------------|--------------------------------|-------------|-----------|
| M06-2X/GD3/cc-pVTZ     |           | -591.311195 | -591.223802 | -591.216549                    | -591.254367 |           |
| M06-2X/DG3/aug-cc-pVTZ |           | -591.315059 | -591.227761 | -591.220486                    | -591.258417 |           |
| MN15/cc-pVTZ           |           | -591.067521 | -590.980476 | -590.973207                    | -591.011063 |           |
| MN15/aug-cc-pVTZ       |           | -591.074265 | -590.987307 | -590.980042                    | -591.017853 |           |
| Coordinates (xyz)      |           |             |             | Vibrations (cm <sup>-1</sup> ) |             |           |
| C                      | 0.004686  | 0.001190    | 0.004916    | 45.7897                        | 985.6827    | 3167.1156 |
| C                      | 0.009705  | -0.001317   | 1.337942    | 162.8718                       | 999.2222    | 3171.9015 |
| S                      | 1.529413  | -0.003868   | 2.233812    | 214.4008                       | 1105.2678   | 3206.544  |
| C                      | 1.552703  | 1.707936    | 2.842798    | 243.29                         | 1224.8563   | 3229.6289 |
| H                      | -0.916954 | -0.036776   | -0.561114   | 461.6154                       | 1344.089    | 3722.9315 |
| H                      | -0.922764 | -0.046966   | 1.880301    | 629.4396                       | 1365.0802   |           |
| H                      | 2.462535  | 1.824777    | 3.426944    | 645.1895                       | 1388.47     |           |
| H                      | 1.556539  | 2.407126    | 2.011343    | 725.1229                       | 1471.2874   |           |
| H                      | 0.690382  | 1.887806    | 3.479543    | 757.1914                       | 1486.0065   |           |
| O                      | 1.086555  | 0.044821    | -0.788788   | 817.6441                       | 1699.5159   |           |
| H                      | 1.871011  | 0.070335    | -0.218856   | 971.6809                       | 3077.5344   |           |

**P14**

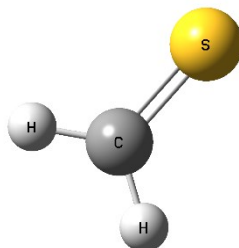

| <b>Method</b>            |           |          |           |                                     | <b>Ee</b>   | <b>E+ZPE</b> | <b>ΔH</b>   | <b>ΔG</b>   |
|--------------------------|-----------|----------|-----------|-------------------------------------|-------------|--------------|-------------|-------------|
| M06-2X/GD3/cc-pVTZ       |           |          |           |                                     | -437.454125 | -437.429159  | -437.425288 | -437.451462 |
| M06-2X/DG3/aug-cc-pVTZ   |           |          |           |                                     | -437.455269 | -437.430309  | -437.426437 | -437.452612 |
| MN15/cc-pVTZ             |           |          |           |                                     | -437.321875 | -437.296904  | -437.293031 | -437.319201 |
| MN15/aug-cc-pVTZ         |           |          |           |                                     | -437.324756 | -437.299773  | -437.2959   | -437.322071 |
| SVECV-f12                |           |          |           |                                     | -437.850338 | -437.825379  | -437.821507 | -437.847682 |
| <b>Coordinates (xyz)</b> |           |          |           | <b>Vibrations (cm<sup>-1</sup>)</b> |             |              |             |             |
| S                        | 0.000000  | 0.000000 | -0.338555 | 1002.9277                           | 3098.983    |              |             |             |
| C                        | 0.000000  | 0.000000 | 1.262464  | 1040.107                            | 3183.7447   |              |             |             |
| H                        | 0.921809  | 0.000000 | 1.838046  | 1128.3775                           |             |              |             |             |
| H                        | -0.921809 | 0.000000 | 1.838046  | 1501.8407                           |             |              |             |             |

| P15                                                                               |              |              |                                |              |
|-----------------------------------------------------------------------------------|--------------|--------------|--------------------------------|--------------|
| 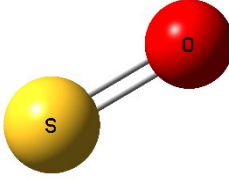 |              |              |                                |              |
| Method                                                                            | Ee           | E+ZPE        | $\Delta H$                     | $\Delta G$   |
| M06-2X/GD3/cc-pVTZ                                                                | -473.359898  | -473.357118  | -473.353798                    | -473.37898   |
| M06-2X/DG3/aug-cc-pVTZ                                                            | -473.362833  | -473.360061  | -473.356741                    | -473.381922  |
| MN15/cc-pVTZ                                                                      | -473.211212  | -473.208419  | -473.205099                    | -473.230272  |
| MN15/aug-cc-pVTZ                                                                  | -473.215875  | -473.213082  | -473.209762                    | -473.234934  |
| SVECV-f12                                                                         | -473.7210453 | -473.7182723 | -473.7149523                   | -473.7401343 |
| Coordinates (xyz)                                                                 |              |              | Vibrations (cm <sup>-1</sup> ) |              |
| O                                                                                 | 0.000000     | 0.000000     | -0.092802                      | 1216.9374    |
| S                                                                                 | 0.000000     | 0.000000     | 1.392802                       |              |

| P16                                                                                 |              |              |                                |              |
|-------------------------------------------------------------------------------------|--------------|--------------|--------------------------------|--------------|
| 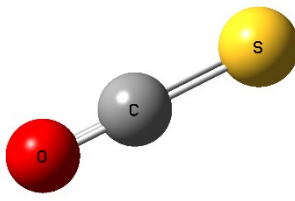 |              |              |                                |              |
| Method                                                                              | Ee           | E+ZPE        | $\Delta H$                     | $\Delta G$   |
| M06-2X/GD3/cc-pVTZ                                                                  | -511.540741  | -511.531338  | -511.527582                    | -511.553822  |
| M06-2X/DG3/aug-cc-pVTZ                                                              | -511.542731  | -511.533341  | -511.529586                    | -511.555823  |
| MN15/cc-pVTZ                                                                        | -511.362279  | -511.352865  | -511.349108                    | -511.375347  |
| MN15/aug-cc-pVTZ                                                                    | -511.365852  | -511.356448  | -511.352692                    | -511.378929  |
| SVECV-f12                                                                           | -511.9970653 | -511.9876753 | -511.9839203                   | -512.0101583 |
| Coordinates (xyz)                                                                   |              |              | Vibrations (cm <sup>-1</sup> ) |              |
| C                                                                                   | 0.000000     | 0.000000     | -0.035976                      | 539.433      |
| S                                                                                   | 0.000000     | 0.000000     | 1.528519                       | 886.0667     |
| O                                                                                   | 0.000000     | 0.000000     | -1.184543                      | 2156.6686    |

| P17                                                                               |           |           |              |                                |              |              |
|-----------------------------------------------------------------------------------|-----------|-----------|--------------|--------------------------------|--------------|--------------|
| 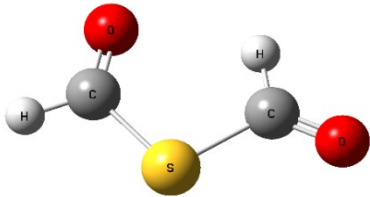 |           |           |              |                                |              |              |
| Method                                                                            |           |           | Ee           | E+ZPE                          | $\Delta H$   | $\Delta G$   |
| M06-2X/GD3/cc-pVTZ                                                                |           |           | -626.032216  | -625.992787                    | -625.98633   | -626.022242  |
| M06-2X/DG3/aug-cc-pVTZ                                                            |           |           | -626.036581  | -625.997206                    | -625.990729  | -626.026703  |
| MN15/cc-pVTZ                                                                      |           |           | -625.775632  | -625.736254                    | -625.729815  | -625.765654  |
| MN15/aug-cc-pVTZ                                                                  |           |           | -625.782443  | -625.743141                    | -625.736683  | -625.772595  |
| SVECV-f12                                                                         |           |           | -625.9100418 | -625.8706678                   | -625.8641908 | -625.9001648 |
| Coordinates (xyz)                                                                 |           |           |              | Vibrations (cm <sup>-1</sup> ) |              |              |
| C                                                                                 | 0.077915  | -0.134725 | 0.093659     | 127.2049                       | 945.432      | 3065.877     |
| S                                                                                 | 0.096421  | 0.750239  | 1.648582     | 152.3736                       | 969.6345     |              |
| C                                                                                 | 1.699531  | 0.202372  | 2.267592     | 194.7619                       | 1346.7254    |              |
| H                                                                                 | -0.849212 | 0.068396  | -0.462587    | 413.6635                       | 1386.4683    |              |
| H                                                                                 | 2.209136  | -0.483264 | 1.579061     | 513.0691                       | 1814.8367    |              |
| O                                                                                 | 0.938933  | -0.853886 | -0.311078    | 725.8905                       | 1844.1277    |              |
| O                                                                                 | 2.121017  | 0.569600  | 3.315787     | 769.9636                       | 3013.4012    |              |

| P17                                                                                 |           |           |             |                                |             |             |
|-------------------------------------------------------------------------------------|-----------|-----------|-------------|--------------------------------|-------------|-------------|
| 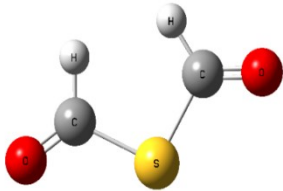 |           |           |             |                                |             |             |
| Method                                                                              |           |           | Ee          | E+ZPE                          | $\Delta H$  | $\Delta G$  |
| M06-2X/GD3/cc-pVTZ                                                                  |           |           | -626.02975  | -625.990427                    | -625.984002 | -626.019059 |
| M06-2X/DG3/aug-cc-pVTZ                                                              |           |           | -626.034711 | -625.995405                    | -625.988984 | -626.024675 |
| MN15/cc-pVTZ                                                                        |           |           | -625.773485 | -625.734281                    | -625.727881 | -625.763501 |
| MN15/aug-cc-pVTZ                                                                    |           |           | -625.780874 | -625.741705                    | -625.735307 | -625.770923 |
| Coordinates (xyz)                                                                   |           |           |             | Vibrations (cm <sup>-1</sup> ) |             |             |
| S                                                                                   | -0.119178 | -0.069814 | -0.097627   | 107.3919                       | 938.218     | 2984.4168   |
| C                                                                                   | -0.035476 | 0.143731  | 1.674861    | 199.8709                       | 941.6918    |             |
| H                                                                                   | 0.889270  | 0.637885  | 2.018062    | 211.2353                       | 1352.4503   |             |
| O                                                                                   | -0.897516 | -0.214528 | 2.410436    | 419.7768                       | 1417.1868   |             |
| C                                                                                   | 1.450464  | 0.673187  | -0.519416   | 484.0183                       | 1820.112    |             |
| H                                                                                   | 2.016349  | 1.039061  | 0.354085    | 691.7716                       | 1864.3959   |             |
| O                                                                                   | 1.843585  | 0.762388  | -1.637487   | 846.3651                       | 2974.4501   |             |

**DMDS**

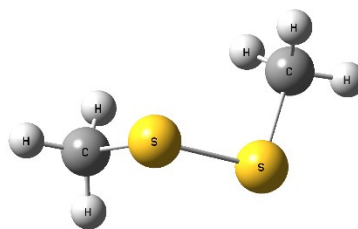

| <b>Method</b>            |           |           |           | <b>Ee</b>                           | <b>E+ZPE</b> | <b>ΔH</b>   | <b>ΔG</b>   |
|--------------------------|-----------|-----------|-----------|-------------------------------------|--------------|-------------|-------------|
| M06-2X/GD3/cc-pVTZ       |           |           |           | -876.198483                         | -876.120592  | -876.113226 | -876.150325 |
| M06-2X/DG3/aug-cc-pVTZ   |           |           |           | -876.20073                          | -876.122874  | -876.115504 | -876.15262  |
| MN15/cc-pVTZ             |           |           |           | -875.930476                         | -875.852828  | -875.845478 | -875.883128 |
| MN15/aug-cc-pVTZ         |           |           |           | -875.936061                         | -875.858528  | -875.851178 | -875.88818  |
| SVECV-f12                |           |           |           | -876.990167                         | -876.912311  | -876.904941 | -876.942056 |
| <b>Coordinates (xyz)</b> |           |           |           | <b>Vibrations (cm<sup>-1</sup>)</b> |              |             |             |
| S                        | 0.438244  | 0.180460  | 1.229979  | 93.617                              | 976.8339     | 3160.2848   |             |
| S                        | 0.283756  | 2.221540  | 1.229979  | 150.7051                            | 977.7661     | 3160.716    |             |
| C                        | 1.661401  | -0.107008 | -0.079014 | 165.742                             | 1338.6807    | 3175.1533   |             |
| C                        | -0.939401 | 2.509008  | -0.079014 | 236.2853                            | 1347.2095    | 3175.2272   |             |
| H                        | 1.819804  | -1.183606 | -0.121396 | 266.3204                            | 1463.1058    |             |             |
| H                        | 1.286068  | 0.238112  | -1.038801 | 527.4481                            | 1468.7437    |             |             |
| H                        | 2.594531  | 0.39209   | 0.165232  | 719.8289                            | 1479.3901    |             |             |
| H                        | -1.097804 | 3.585606  | -0.121396 | 722.2997                            | 1483.4613    |             |             |
| H                        | -0.564068 | 2.163888  | -1.038801 | 967.2223                            | 3073.7864    |             |             |
| H                        | -1.872531 | 2.00991   | 0.165232  | 970.2753                            | 3074.9082    |             |             |

C. Intermediaries (\_Im).

1. Addition of OH at C1 and C2.

| CR_add                                                                            |              |           |          |                                |              |              |
|-----------------------------------------------------------------------------------|--------------|-----------|----------|--------------------------------|--------------|--------------|
| 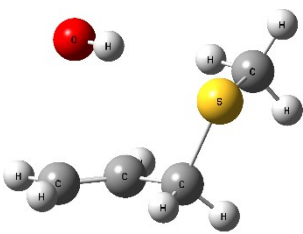 |              |           |          |                                |              |              |
| Method                                                                            | Ee           |           |          | E+ZPE                          | $\Delta H$   | $\Delta G$   |
| M06-2X/GD3/cc-pVTZ                                                                | -631.12471   |           |          | -631.002952                    | -630.992701  | -631.037876  |
| M06-2X/DG3/aug-cc-pVTZ                                                            | -631.129235  |           |          | -631.007704                    | -630.997363  | -631.042985  |
| MN15/cc-pVTZ                                                                      | -630.844751  |           |          | -630.723463                    | -630.713161  | -630.758592  |
| MN15/aug-cc-pVTZ                                                                  | -630.852843  |           |          | -630.731785                    | -630.721441  | -630.767122  |
| SVECV-f12                                                                         | -631.0175668 |           |          | -630.8960358                   | -630.8856948 | -630.9313168 |
| Coordinates (xyz)                                                                 |              |           |          | Vibrations (cm <sup>-1</sup> ) |              |              |
| C                                                                                 | -0.000768    | 0.051670  | 0.009725 | 57.5151                        | 947.9705     | 3068.9031    |
| C                                                                                 | -0.002071    | -0.035024 | 1.338546 | 84.6513                        | 969.306      | 3076.4319    |
| C                                                                                 | 1.239963     | -0.033715 | 2.168333 | 112.3329                       | 970.0492     | 3134.2161    |
| S                                                                                 | 1.70192      | -1.684417 | 2.763181 | 130.3167                       | 981.6448     | 3154.8962    |
| C                                                                                 | 0.229179     | -2.085493 | 3.710922 | 144.5338                       | 1020.2054    | 3170.7512    |
| H                                                                                 | 0.926819     | 0.148813  | -0.54238 | 198.9826                       | 1101.5711    | 3173.8012    |
| H                                                                                 | -0.917017    | 0.021726  | -0.56088 | 248.4827                       | 1221.6912    | 3195.8592    |
| H                                                                                 | -0.943758    | -0.138936 | 1.864721 | 326.979                        | 1250.6536    | 3272.1255    |
| H                                                                                 | 1.137119     | 0.618071  | 3.037321 | 400.6452                       | 1310.6971    | 3659.6078    |
| H                                                                                 | 2.092218     | 0.309867  | 1.582906 | 449.8827                       | 1349.298     |              |
| H                                                                                 | 0.432259     | -3.008587 | 4.248254 | 550.4144                       | 1430.9328    |              |
| H                                                                                 | 0.018159     | -1.299064 | 4.434747 | 615.4864                       | 1452.3627    |              |
| H                                                                                 | -0.625039    | -2.2372   | 3.053538 | 736.8591                       | 1456.3873    |              |
| O                                                                                 | -0.499597    | -2.523169 | 0.405436 | 785.9785                       | 1478.0667    |              |
| H                                                                                 | 0.386474     | -2.550145 | 0.823558 | 851.3457                       | 1697.4493    |              |



**A1**

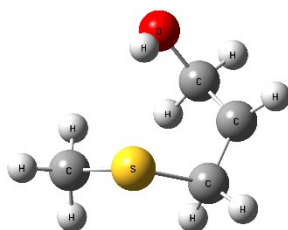

| <b>Method</b>            |           |           |           |          |           |           | <b>Ee</b>   |  |  | <b>E+ZPE</b>                        |  |  | $\Delta H$  |  |  | $\Delta G$  |  |  |
|--------------------------|-----------|-----------|-----------|----------|-----------|-----------|-------------|--|--|-------------------------------------|--|--|-------------|--|--|-------------|--|--|
| M06-2X/GD3/cc-pVTZ       |           |           |           |          |           |           | -631.169438 |  |  | -631.043704                         |  |  | -631.034626 |  |  | -631.076763 |  |  |
| M06-2X/DG3/aug-cc-pVTZ   |           |           |           |          |           |           | -631.174097 |  |  | -631.048493                         |  |  | -631.039378 |  |  | -631.081689 |  |  |
| MN15/cc-pVTZ             |           |           |           |          |           |           | -630.890697 |  |  | -630.76558                          |  |  | -630.756485 |  |  | -630.798609 |  |  |
| MN15/aug-cc-pVTZ         |           |           |           |          |           |           | -630.89901  |  |  | -630.774153                         |  |  | -630.765011 |  |  | -630.807331 |  |  |
| SVECV-f12                |           |           |           |          |           |           | -631.05701  |  |  | -630.931406                         |  |  | -630.922291 |  |  | -630.964603 |  |  |
| <b>Coordinates (xyz)</b> |           |           |           |          |           |           |             |  |  | <b>Vibrations (cm<sup>-1</sup>)</b> |  |  |             |  |  |             |  |  |
| C                        | 0.047799  | -0.104937 | 0.001055  | 87.7476  | 987.3062  | 3026.1644 |             |  |  |                                     |  |  |             |  |  |             |  |  |
| C                        | -0.035159 | 0.217096  | 1.449726  | 113.4153 | 1037.3301 | 3068.625  |             |  |  |                                     |  |  |             |  |  |             |  |  |
| C                        | 1.097252  | -0.062172 | 2.349927  | 123.5006 | 1077.5924 | 3072.4922 |             |  |  |                                     |  |  |             |  |  |             |  |  |
| S                        | 1.420496  | -1.881935 | 2.543012  | 216.0425 | 1159.6271 | 3098.5875 |             |  |  |                                     |  |  |             |  |  |             |  |  |
| C                        | 2.533735  | -2.168226 | 1.142773  | 256.3752 | 1190.7126 | 3148.921  |             |  |  |                                     |  |  |             |  |  |             |  |  |
| H                        | 1.085544  | -0.021993 | -0.341754 | 264.1104 | 1220.1946 | 3156.3684 |             |  |  |                                     |  |  |             |  |  |             |  |  |
| H                        | -0.553107 | 0.587395  | -0.58899  | 367.0467 | 1262.1469 | 3164.3279 |             |  |  |                                     |  |  |             |  |  |             |  |  |
| H                        | -1.019787 | 0.346172  | 1.879661  | 406.1246 | 1325.4238 | 3194.3501 |             |  |  |                                     |  |  |             |  |  |             |  |  |
| H                        | 0.920652  | 0.301978  | 3.358616  | 423.0419 | 1358.7635 | 3816.8718 |             |  |  |                                     |  |  |             |  |  |             |  |  |
| H                        | 2.034152  | 0.363154  | 1.98592   | 593.6488 | 1394.2161 |           |             |  |  |                                     |  |  |             |  |  |             |  |  |
| H                        | 2.880343  | -3.195255 | 1.231188  | 668.5772 | 1438.8624 |           |             |  |  |                                     |  |  |             |  |  |             |  |  |
| H                        | 2.026515  | -2.049174 | 0.187828  | 740.2726 | 1466.6789 |           |             |  |  |                                     |  |  |             |  |  |             |  |  |
| H                        | 3.390761  | -1.500394 | 1.201874  | 844.9944 | 1476.2104 |           |             |  |  |                                     |  |  |             |  |  |             |  |  |
| O                        | -0.460462 | -1.408977 | -0.292044 | 895.8755 | 1489.6693 |           |             |  |  |                                     |  |  |             |  |  |             |  |  |
| H                        | -0.270628 | -1.977748 | 0.462536  | 976.0409 | 1525.4085 |           |             |  |  |                                     |  |  |             |  |  |             |  |  |

**A2**

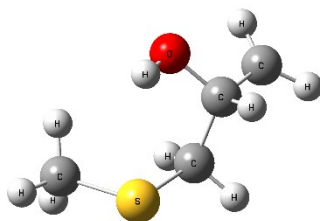

| Method                 | Ee          | E+ZPE       | $\Delta H$                     | $\Delta G$  |           |           |
|------------------------|-------------|-------------|--------------------------------|-------------|-----------|-----------|
| M06-2X/GD3/cc-pVTZ     | -631.167788 | -631.044282 | -631.034703                    | -631.078064 |           |           |
| M06-2X/DG3/aug-cc-pVTZ | -631.172284 | -631.048958 | -631.039298                    | -631.083072 |           |           |
| MN15/cc-pVTZ           | -630.888943 | -630.765771 | -630.756268                    | -630.799363 |           |           |
| MN15/aug-cc-pVTZ       | -630.897068 | -630.774134 | -630.764575                    | -630.80794  |           |           |
| SVECV-f12              | -631.055302 | -630.931977 | -630.922317                    | -630.96609  |           |           |
| Coordinates (xyz)      |             |             | Vibrations (cm <sup>-1</sup> ) |             |           |           |
| C                      | 0.006500    | 0.032736    | -0.007362                      | 62.4062     | 960.9728  | 2984.7663 |
| C                      | -0.000589   | 0.009011    | 1.473127                       | 90.4849     | 982.9228  | 3074.2086 |
| C                      | 1.437707    | -0.028198   | 2.019545                       | 102.2478    | 1027.9736 | 3081.8057 |
| S                      | 1.498793    | -0.215831   | 3.828956                       | 160.232     | 1073.8663 | 3141.3405 |
| C                      | 1.800323    | -1.999342   | 3.945071                       | 220.0767    | 1140.0759 | 3158.7162 |
| H                      | 0.377707    | 0.896979    | -0.534904                      | 282.5542    | 1214.8683 | 3170.8496 |
| H                      | -0.264625   | -0.857216   | -0.552394                      | 328.6943    | 1252.594  | 3183.9059 |
| H                      | -0.471304   | 0.924478    | 1.85819                        | 419.4877    | 1269.7479 | 3297.2628 |
| H                      | 1.951387    | 0.89696     | 1.762786                       | 445.6531    | 1353.1975 | 3823.6089 |
| H                      | 1.983078    | -0.859244   | 1.572313                       | 472.7354    | 1355.999  |           |
| H                      | 1.767667    | -2.259593   | 5.000172                       | 484.627     | 1404.5233 |           |
| H                      | 1.037766    | -2.558193   | 3.40843                        | 724.5414    | 1449.681  |           |
| H                      | 2.783971    | -2.240475   | 3.548613                       | 768.5163    | 1464.8645 |           |
| O                      | -0.736495   | -1.120456   | 1.897635                       | 839.8354    | 1474.0181 |           |
| H                      | -0.764574   | -1.093097   | 2.860673                       | 894.3559    | 1495.5268 |           |

**A10**

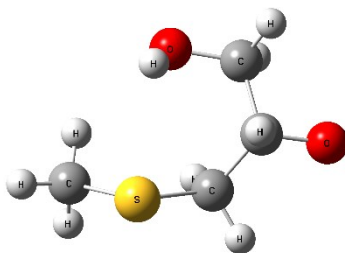

| <b>Method</b>            |          |           |           |         |          |           | <b>Ee</b>                           |          |          | <b>E+ZPE</b> |         |           | <b><math>\Delta H</math></b> |   |          | <b><math>\Delta G</math></b> |        |          |           |           |   |          |           |          |          |           |           |   |          |           |          |          |           |           |   |          |          |           |          |           |           |   |           |           |           |         |           |           |   |           |           |          |          |           |           |   |          |          |          |         |          |           |   |        |          |          |          |           |           |   |        |           |          |          |           |  |   |          |           |          |          |           |  |   |          |           |          |          |           |  |   |          |          |           |          |           |  |   |          |           |          |          |           |  |   |           |          |          |          |           |  |
|--------------------------|----------|-----------|-----------|---------|----------|-----------|-------------------------------------|----------|----------|--------------|---------|-----------|------------------------------|---|----------|------------------------------|--------|----------|-----------|-----------|---|----------|-----------|----------|----------|-----------|-----------|---|----------|-----------|----------|----------|-----------|-----------|---|----------|----------|-----------|----------|-----------|-----------|---|-----------|-----------|-----------|---------|-----------|-----------|---|-----------|-----------|----------|----------|-----------|-----------|---|----------|----------|----------|---------|----------|-----------|---|--------|----------|----------|----------|-----------|-----------|---|--------|-----------|----------|----------|-----------|--|---|----------|-----------|----------|----------|-----------|--|---|----------|-----------|----------|----------|-----------|--|---|----------|----------|-----------|----------|-----------|--|---|----------|-----------|----------|----------|-----------|--|---|-----------|----------|----------|----------|-----------|--|
| M06-2X/GD3/cc-pVTZ       |          |           |           |         |          |           | -706.380428                         |          |          | -706.250143  |         |           | -706.240228                  |   |          | -706.284735                  |        |          |           |           |   |          |           |          |          |           |           |   |          |           |          |          |           |           |   |          |          |           |          |           |           |   |           |           |           |         |           |           |   |           |           |          |          |           |           |   |          |          |          |         |          |           |   |        |          |          |          |           |           |   |        |           |          |          |           |  |   |          |           |          |          |           |  |   |          |           |          |          |           |  |   |          |          |           |          |           |  |   |          |           |          |          |           |  |   |           |          |          |          |           |  |
| M06-2X/DG3/aug-cc-pVTZ   |          |           |           |         |          |           | -706.386279                         |          |          | -706.256052  |         |           | -706.246134                  |   |          | -706.290676                  |        |          |           |           |   |          |           |          |          |           |           |   |          |           |          |          |           |           |   |          |          |           |          |           |           |   |           |           |           |         |           |           |   |           |           |          |          |           |           |   |          |          |          |         |          |           |   |        |          |          |          |           |           |   |        |           |          |          |           |  |   |          |           |          |          |           |  |   |          |           |          |          |           |  |   |          |          |           |          |           |  |   |          |           |          |          |           |  |   |           |          |          |          |           |  |
| MN15/cc-pVTZ             |          |           |           |         |          |           | -706.056221                         |          |          | -705.926485  |         |           | -705.916624                  |   |          | -705.96085                   |        |          |           |           |   |          |           |          |          |           |           |   |          |           |          |          |           |           |   |          |          |           |          |           |           |   |           |           |           |         |           |           |   |           |           |          |          |           |           |   |          |          |          |         |          |           |   |        |          |          |          |           |           |   |        |           |          |          |           |  |   |          |           |          |          |           |  |   |          |           |          |          |           |  |   |          |          |           |          |           |  |   |          |           |          |          |           |  |   |           |          |          |          |           |  |
| MN15/aug-cc-pVTZ         |          |           |           |         |          |           | -706.066087                         |          |          | -705.936481  |         |           | -705.926595                  |   |          | -705.970974                  |        |          |           |           |   |          |           |          |          |           |           |   |          |           |          |          |           |           |   |          |          |           |          |           |           |   |           |           |           |         |           |           |   |           |           |          |          |           |           |   |          |          |          |         |          |           |   |        |          |          |          |           |           |   |        |           |          |          |           |  |   |          |           |          |          |           |  |   |          |           |          |          |           |  |   |          |          |           |          |           |  |   |          |           |          |          |           |  |   |           |          |          |          |           |  |
| SVECV-f12                |          |           |           |         |          |           | -706.166063                         |          |          | -706.035835  |         |           | -706.025917                  |   |          | -706.070459                  |        |          |           |           |   |          |           |          |          |           |           |   |          |           |          |          |           |           |   |          |          |           |          |           |           |   |           |           |           |         |           |           |   |           |           |          |          |           |           |   |          |          |          |         |          |           |   |        |          |          |          |           |           |   |        |           |          |          |           |  |   |          |           |          |          |           |  |   |          |           |          |          |           |  |   |          |          |           |          |           |  |   |          |           |          |          |           |  |   |           |          |          |          |           |  |
| <b>Coordinates (xyz)</b> |          |           |           |         |          |           | <b>Vibrations (cm<sup>-1</sup>)</b> |          |          |              |         |           |                              |   |          |                              |        |          |           |           |   |          |           |          |          |           |           |   |          |           |          |          |           |           |   |          |          |           |          |           |           |   |           |           |           |         |           |           |   |           |           |          |          |           |           |   |          |          |          |         |          |           |   |        |          |          |          |           |           |   |        |           |          |          |           |  |   |          |           |          |          |           |  |   |          |           |          |          |           |  |   |          |          |           |          |           |  |   |          |           |          |          |           |  |   |           |          |          |          |           |  |
| C                        | 0.032194 | -0.010880 | -0.002860 | 70.9721 | 984.2576 | 1518.6574 | C                                   | 0.007305 | 0.002282 | 1.561647     | 97.7455 | 1000.4063 | 2958.2696                    | C | 1.410624 | 0.0041                       | 2.1762 | 132.1558 | 1046.6799 | 3072.6271 | S | 2.090047 | -1.679847 | 2.342373 | 184.7572 | 1098.1912 | 3075.2312 | C | 3.603144 | -1.526824 | 1.360788 | 204.0308 | 1151.8445 | 3091.3893 | H | 0.308454 | 0.984889 | -0.346684 | 269.5969 | 1168.1453 | 3132.2666 | H | -0.976254 | -0.237127 | -0.351721 | 287.969 | 1181.0625 | 3149.8109 | H | -0.541049 | -0.904802 | 1.864442 | 335.9687 | 1255.6297 | 3163.1498 | H | 1.351439 | 0.456741 | 3.163241 | 380.943 | 1271.382 | 3171.1969 | H | 2.0944 | 0.592995 | 1.565844 | 410.3753 | 1343.6118 | 3816.6976 | H | 4.0643 | -2.511215 | 1.337378 | 479.9557 | 1351.8985 |  | H | 3.361551 | -1.209729 | 0.349191 | 727.4647 | 1381.2155 |  | H | 4.289633 | -0.824858 | 1.827428 | 745.7611 | 1421.2609 |  | O | 0.989206 | -0.89767 | -0.513864 | 780.7059 | 1464.6027 |  | H | 0.918943 | -1.743181 | -0.05637 | 873.9148 | 1478.4909 |  | O | -0.728902 | 1.096185 | 1.881967 | 936.3819 | 1496.5404 |  |

**A20**

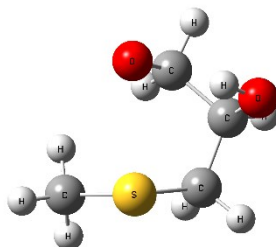

| <b>Method</b>            |           |           |           | <b>Ee</b>                           | <b>E+ZPE</b> | <b>ΔH</b>   | <b>ΔG</b>   |
|--------------------------|-----------|-----------|-----------|-------------------------------------|--------------|-------------|-------------|
| M06-2X/GD3/cc-pVTZ       |           |           |           | -706.388008                         | -706.257243  | -706.247712 | -706.291202 |
| M06-2X/DG3/aug-cc-pVTZ   |           |           |           | -706.393995                         | -706.263378  | -706.253799 | -706.297484 |
| MN15/cc-pVTZ             |           |           |           | -706.066313                         | -705.935708  | -705.926378 | -705.969162 |
| MN15/aug-cc-pVTZ         |           |           |           | -706.076341                         | -705.945989  | -705.936637 | -705.979472 |
| SVECV-f12                |           |           |           | -706.266941                         | -706.136324  | -706.126745 | -706.17043  |
| <b>Coordinates (xyz)</b> |           |           |           | <b>Vibrations (cm<sup>-1</sup>)</b> |              |             |             |
| C                        | -0.029807 | 0.039869  | -0.014940 | 76.4409                             | 975.3534     | 1483.294    |             |
| C                        | 0.010010  | -0.016269 | 1.519772  | 107.1938                            | 985.196      | 2964.023    |             |
| C                        | 1.45883   | -0.011456 | 2.013192  | 137.0928                            | 1014.6713    | 3018.2589   |             |
| S                        | 2.450246  | -1.334574 | 1.270365  | 170.7684                            | 1100.6239    | 3073.733    |             |
| C                        | 3.334148  | -0.425    | -0.019091 | 213.3131                            | 1122.4778    | 3078.1691   |             |
| H                        | 0.551204  | 0.8919    | -0.393449 | 244.3521                            | 1152.2103    | 3089.1237   |             |
| H                        | -1.083354 | 0.180045  | -0.305274 | 317.7894                            | 1200.8568    | 3145.544    |             |
| H                        | 1.456402  | -0.178838 | 3.088671  | 382.1484                            | 1253.6601    | 3164.9964   |             |
| H                        | 1.942038  | 0.94418   | 1.810725  | 440.2895                            | 1280.6687    | 3175.2306   |             |
| H                        | 3.998285  | -1.139282 | -0.4992   | 496.1983                            | 1341.0353    | 3791.2562   |             |
| H                        | 2.645472  | -0.032595 | -0.762138 | 667.7518                            | 1349.5982    |             |             |
| H                        | 3.92789   | 0.372258  | 0.42245   | 746.087                             | 1364.4248    |             |             |
| O                        | 0.350125  | -1.161053 | -0.547415 | 773.2125                            | 1425.9777    |             |             |
| H                        | -0.433291 | -1.876722 | 1.384642  | 844.0344                            | 1445.2675    |             |             |
| H                        | -0.502488 | 0.857034  | 1.929459  | 852.4687                            | 1453.8244    |             |             |
| O                        | -0.678719 | -1.149742 | 1.972514  | 941.4612                            | 1474.1794    |             |             |

### Ad\_Im1

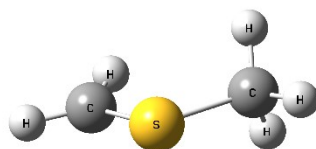

| Method                 |           | Ee          | E+ZPE                          | $\Delta H$  | $\Delta G$  |           |
|------------------------|-----------|-------------|--------------------------------|-------------|-------------|-----------|
| M06-2X/GD3/cc-pVTZ     |           | -477.33585  | -477.274164                    | -477.268013 | -477.302011 |           |
| M06-2X/DG3/aug-cc-pVTZ |           | -477.337743 | -477.276094                    | -477.269919 | -477.304007 |           |
| MN15/cc-pVTZ           |           | -477.170709 | -477.10907                     | -477.102899 | -477.137029 |           |
| MN15/aug-cc-pVTZ       |           | -477.175096 | -477.113361                    | -477.107269 | -477.141164 |           |
| SVECV-f12              |           | -477.240136 | -477.178488                    | -477.172313 | -477.206401 |           |
| Coordinates (xyz)      |           |             | Vibrations (cm <sup>-1</sup> ) |             |             |           |
| C                      | 0.067803  | -0.079664   | 0.099211                       | 120.0078    | 1027.4791   | 3189.2872 |
| S                      | -0.086689 | -0.142757   | 1.79604                        | 179.9037    | 1348.1442   | 3315.0295 |
| C                      | 1.640039  | 0.02227     | 2.293987                       | 299.3286    | 1407.9069   |           |
| H                      | -0.830284 | -0.175969   | -0.48685                       | 344.6281    | 1472.2998   |           |
| H                      | 0.99969   | 0.211092    | -0.35786                       | 732.3431    | 1485.8485   |           |
| H                      | 1.6677    | 0.010814    | 3.380023                       | 858.3843    | 3076.441    |           |
| H                      | 2.220379  | -0.810591   | 1.90475                        | 897.3256    | 3161.0065   |           |
| H                      | 2.042969  | 0.964806    | 1.930698                       | 968.3239    | 3176.8964   |           |

**Ad\_Im2**

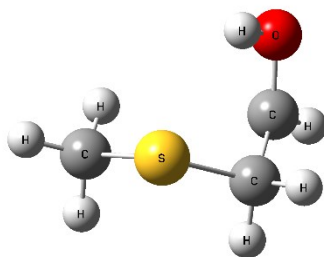

| Method                 | Ee          | E+ZPE       | $\Delta H$                     | $\Delta G$  |           |           |
|------------------------|-------------|-------------|--------------------------------|-------------|-----------|-----------|
| M06-2X/GD3/cc-pVTZ     | -591.871873 | -591.775221 | -591.767303                    | -591.806809 |           |           |
| M06-2X/DG3/aug-cc-pVTZ | -591.876384 | -591.779816 | -591.771891                    | -591.811368 |           |           |
| MN15/cc-pVTZ           | -591.628125 | -591.532102 | -591.524073                    | -591.563639 |           |           |
| MN15/aug-cc-pVTZ       | -591.635563 | -591.539699 | -591.53167                     | -591.571238 |           |           |
| SVECV-f12              | -591.761333 | -591.664766 | -591.656841                    | -591.696317 |           |           |
| Coordinates (xyz)      |             |             | Vibrations (cm <sup>-1</sup> ) |             |           |           |
| C                      | 0.141064    | 0.148604    | -0.026128                      | 76.3648     | 980.2232  | 3072.9577 |
| C                      | 0.129472    | 0.041535    | 1.450134                       | 136.2481    | 1006.9793 | 3117.6064 |
| S                      | 1.818031    | -0.06345    | 2.148099                       | 178.1463    | 1174.4309 | 3155.4642 |
| C                      | 2.463353    | 1.530306    | 1.58785                        | 225.0987    | 1191.6568 | 3171.4298 |
| H                      | -0.349103   | -0.880284   | 1.802636                       | 313.4133    | 1267.6518 | 3236.9572 |
| H                      | -0.399727   | 0.885002    | 1.890761                       | 381.051     | 1350.5114 | 3745.9706 |
| H                      | 3.492623    | 1.596063    | 1.930818                       | 541.3566    | 1352.5918 |           |
| H                      | 2.435614    | 1.595973    | 0.502626                       | 563.7716    | 1442.2513 |           |
| H                      | 1.886836    | 2.344141    | 2.022842                       | 706.1539    | 1455.8754 |           |
| H                      | 1.58022     | -1.073017   | -0.17059                       | 752.0143    | 1470.9821 |           |
| H                      | -0.677796   | 0.586296    | -0.574961                      | 865.8673    | 1485.9019 |           |
| O                      | 0.870595    | -0.741759   | -0.740265                      | 964.0101    | 3005.5657 |           |

**Ad\_Im2\_O**

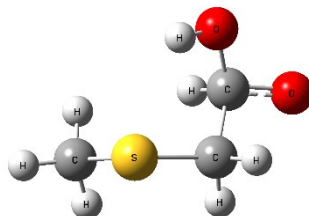

| Method                 | Ee          | E+ZPE       | $\Delta H$                     | $\Delta G$  |           |           |
|------------------------|-------------|-------------|--------------------------------|-------------|-----------|-----------|
| M06-2X/GD3/cc-pVTZ     | -667.087459 | -666.986348 | -666.977826                    | -667.019306 |           |           |
| M06-2X/DG3/aug-cc-pVTZ | -667.093507 | -666.992579 | -666.984022                    | -667.025551 |           |           |
| MN15/cc-pVTZ           | -666.797401 | -666.696711 | -666.688209                    | -666.729463 |           |           |
| MN15/aug-cc-pVTZ       | -666.806643 | -666.706231 | -666.697693                    | -666.7391   |           |           |
| SVECV-f12              | -666.826467 | -666.725539 | -666.716982                    | -666.758511 |           |           |
| Coordinates (xyz)      |             |             | Vibrations (cm <sup>-1</sup> ) |             |           |           |
| C                      | -0.063424   | -0.019677   | -0.055695                      | 51.237      | 970.2075  | 2899.6224 |
| C                      | 0.029055    | 0.001549    | 1.501312                       | 116.6261    | 975.1533  | 3071.4355 |
| S                      | 1.723596    | -0.030422   | 2.108542                       | 192.5299    | 1031.2684 | 3099.1123 |
| C                      | 2.29345     | 1.577623    | 1.510391                       | 227.5595    | 1130.8236 | 3153.2946 |
| H                      | -0.451606   | -0.89937    | 1.878385                       | 275.5703    | 1168.0111 | 3163.3206 |
| H                      | -0.501462   | 0.875544    | 1.871508                       | 335.7525    | 1227.233  | 3171.3083 |
| H                      | 3.293769    | 1.725743    | 1.908838                       | 362.4401    | 1256.0348 | 3792.4424 |
| H                      | 2.340904    | 1.601784    | 0.423508                       | 475.099     | 1302.63   |           |
| H                      | 1.642319    | 2.368823    | 1.876037                       | 573.8562    | 1334.2773 |           |
| H                      | 1.498535    | -1.161444   | -0.084081                      | 714.7797    | 1357.75   |           |
| O                      | 0.707402    | -1.035368   | -0.623073                      | 757.2307    | 1446.1741 |           |
| H                      | 0.271112    | 0.970308    | -0.424176                      | 821.3302    | 1475.1804 |           |
| O                      | -1.356336   | -0.122573   | -0.357988                      | 885.9963    | 1486.8744 |           |

**Ad\_Im2\_O2**

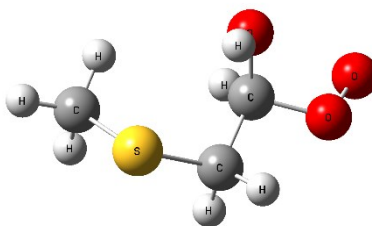

| Method                 | Ee          | E+ZPE       | $\Delta H$                     | $\Delta G$  |           |           |
|------------------------|-------------|-------------|--------------------------------|-------------|-----------|-----------|
| M06-2X/GD3/cc-pVTZ     | -742.248689 | -742.141931 | -742.132208                    | -742.176885 |           |           |
| M06-2X/DG3/aug-cc-pVTZ | -742.255256 | -742.148681 | -742.138911                    | -742.183777 |           |           |
| MN15/cc-pVTZ           | -741.913181 | -741.806878 | -741.797215                    | -741.841722 |           |           |
| MN15/aug-cc-pVTZ       | -741.923219 | -741.817147 | -741.807452                    | -741.85207  |           |           |
| SVECV-f12              | -742.119829 | -742.013254 | -742.003484                    | -742.04835  |           |           |
| Coordinates (xyz)      |             |             | Vibrations (cm <sup>-1</sup> ) |             |           |           |
| C                      | -0.011141   | 0.169072    | -0.022051                      | 54.0229     | 952.5095  | 1490.0263 |
| C                      | 0.022528    | 0.060249    | 1.497873                       | 86.6355     | 969.2466  | 3072.3473 |
| S                      | 1.685668    | -0.024891   | 2.194128                       | 97.1238     | 985.8634  | 3084.897  |
| C                      | 2.367033    | 1.511108    | 1.525085                       | 169.8043    | 1052.4275 | 3119.4532 |
| H                      | -0.471176   | -0.867401   | 1.790159                       | 205.3307    | 1179.6188 | 3140.6628 |
| H                      | -0.536254   | 0.888684    | 1.930127                       | 246.4762    | 1193.3241 | 3156.771  |
| H                      | 3.365915    | 1.619366    | 1.939217                       | 274.8147    | 1265.1933 | 3173.3936 |
| H                      | 2.433317    | 1.462713    | 0.440381                       | 346.3669    | 1289.5139 | 3805.3361 |
| H                      | 1.760983    | 2.360758    | 1.833172                       | 380.9526    | 1335.3786 |           |
| H                      | 1.317182    | -1.227017   | -0.072282                      | 540.1957    | 1355.2988 |           |
| O                      | 0.908491    | -0.604348   | -0.685569                      | 598.9455    | 1392.1528 |           |
| H                      | 0.06243     | 1.193041    | -0.385599                      | 726.6068    | 1450.161  |           |
| O                      | -1.357783   | -0.263425   | -0.371322                      | 794.4541    | 1466.3748 |           |
| O                      | -1.717539   | 0.200939    | -1.529878                      | 852.9885    | 1476.2238 |           |



| P3_Im1                                                                            |             |             |                                |             |           |
|-----------------------------------------------------------------------------------|-------------|-------------|--------------------------------|-------------|-----------|
| 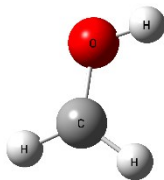 |             |             |                                |             |           |
| Method                                                                            | Ee          | E+ZPE       | $\Delta H$                     | $\Delta G$  |           |
| M06-2X/GD3/cc-pVTZ                                                                | -115.052657 | -115.014983 | -115.010697                    | -115.037962 |           |
| M06-2X/DG3/aug-cc-pVTZ                                                            | -115.056127 | -115.018536 | -115.014232                    | -115.041523 |           |
| MN15/cc-pVTZ                                                                      | -114.975028 | -114.937888 | -114.933374                    | -114.961027 |           |
| MN15/aug-cc-pVTZ                                                                  | -114.979314 | -114.94234  | -114.937753                    | -114.96556  |           |
| SVECV-f12                                                                         | -115.043941 | -115.00635  | -115.002046                    | -115.029337 |           |
| Coordinates (xyz)                                                                 |             |             | Vibrations (cm <sup>-1</sup> ) |             |           |
| C                                                                                 | 0.00545     | 0.002071    | 0.000246                       | 408.8737    | 1494.903  |
| H                                                                                 | -0.001567   | -0.007276   | 1.077017                       | 583.2139    | 3160.8342 |
| H                                                                                 | 0.934522    | 0.006823    | -0.550792                      | 1063.2462   | 3298.4584 |
| O                                                                                 | -1.085765   | -0.583982   | -0.560655                      | 1236.2151   | 3895.9641 |
| H                                                                                 | -0.98958    | -0.616906   | -1.514844                      | 1358.9451   |           |

| P3_Im2                                                                              |              |              |                                |              |           |
|-------------------------------------------------------------------------------------|--------------|--------------|--------------------------------|--------------|-----------|
| 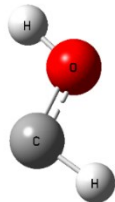 |              |              |                                |              |           |
| Method                                                                              | Ee           | E+ZPE        | $\Delta H$                     | $\Delta G$   |           |
| M06-2X/GD3/cc-pVTZ                                                                  | -114.415051  | -114.387937  | -114.384107                    | -114.409632  |           |
| M06-2X/DG3/aug-cc-pVTZ                                                              | -114.418013  | -114.390928  | -114.387097                    | -114.41262   |           |
| MN15/cc-pVTZ                                                                        | -114.338116  | -114.311186  | -114.307352                    | -114.332887  |           |
| MN15/aug-cc-pVTZ                                                                    | -114.34156   | -114.314662  | -114.310827                    | -114.33636   |           |
| SVECV-f12                                                                           | -114.4040481 | -114.3769631 | -114.3731321                   | -114.3986551 |           |
| Coordinates (xyz)                                                                   |              |              | Vibrations (cm <sup>-1</sup> ) |              |           |
| H                                                                                   | 0.017978     | -0.000140    | -0.000872                      | 1087.5314    | 2911.6041 |
| C                                                                                   | -0.003793    | 0.000104     | 1.857863                       | 1224.728     | 3779.7916 |
| H                                                                                   | 0.812721     | -0.000115    | 2.610072                       | 1376.9712    |           |
| O                                                                                   | 0.649322     | -0.000291    | 0.730513                       | 1508.4146    |           |

2. Reactions of the peroxy radicals (A1O2, A2O2) with NO<sub>2</sub>

| A1O2-NO <sub>2</sub>                                                              |             |           |                                |             |             |           |
|-----------------------------------------------------------------------------------|-------------|-----------|--------------------------------|-------------|-------------|-----------|
| 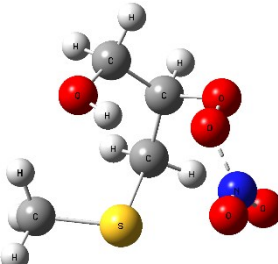 |             |           |                                |             |             |           |
| Method                                                                            | Ee          |           | E+ZPE                          | ΔH          | ΔG          |           |
| M06-2X/GD3/cc-pVTZ                                                                | -986.658867 |           | -986.508045                    | -986.494958 | -986.546692 |           |
| M06-2X/DG3/aug-cc-pVTZ                                                            | -986.668341 |           | -986.517712                    | -986.504603 | -986.556428 |           |
| MN15/cc-pVTZ                                                                      | -986.158012 |           | -986.008433                    | -985.995116 | -986.047489 |           |
| MN15/aug-cc-pVTZ                                                                  | -986.172309 |           | -986.023072                    | -986.009702 | -986.062295 |           |
| Coordinates (xyz)                                                                 |             |           | Vibrations (cm <sup>-1</sup> ) |             |             |           |
| C                                                                                 | 0.118636    | 0.093140  | -0.030252                      | 64.6622     | 813.2374    | 1451.6264 |
| C                                                                                 | -0.038572   | -0.014456 | 1.480555                       | 77.7527     | 833.1851    | 1471.3948 |
| C                                                                                 | 1.205048    | -0.266457 | 2.326571                       | 84.6991     | 855.0344    | 1495.3471 |
| S                                                                                 | 2.164976    | -1.795009 | 2.101015                       | 109.0869    | 870.9558    | 1502.0509 |
| C                                                                                 | 3.419527    | -1.243904 | 0.922915                       | 129.6953    | 958.9188    | 1835.768  |
| H                                                                                 | 0.730143    | 0.973721  | -0.235249                      | 170.3494    | 982.9907    | 3039.5227 |
| H                                                                                 | -0.876917   | 0.274359  | -0.44863                       | 187.8036    | 984.7475    | 3058.2891 |
| H                                                                                 | 0.894912    | -0.264665 | 3.370095                       | 201.1324    | 1022.9367   | 3073.9366 |
| H                                                                                 | 1.886908    | 0.573571  | 2.184721                       | 234.0226    | 1057.7917   | 3079.2847 |
| H                                                                                 | 4.08428     | -2.09045  | 0.767173                       | 264.2365    | 1108.855    | 3100.4049 |
| H                                                                                 | 2.962151    | -0.962761 | -0.020718                      | 314.4912    | 1159.6791   | 3136.2519 |
| H                                                                                 | 3.99212     | -0.420752 | 1.345876                       | 339.2751    | 1245.2327   | 3159.0129 |
| H                                                                                 | 0.343392    | -1.807485 | -0.39979                       | 345.1361    | 1261.1517   | 3182.0442 |
| O                                                                                 | 0.752001    | -0.982742 | -0.677698                      | 425.0134    | 1291.2008   | 3870.2456 |
| H                                                                                 | -0.439763   | 0.951125  | 1.805685                       | 490.9592    | 1342.9107   |           |
| O                                                                                 | -1.150844   | -0.857133 | 1.84233                        | 561.7704    | 1357.3869   |           |
| O                                                                                 | -0.998213   | -2.12784  | 1.29561                        | 662.7342    | 1369.9688   |           |
| N                                                                                 | -0.638411   | -3.079675 | 2.327534                       | 710.0884    | 1395.0433   |           |
| O                                                                                 | -0.51161    | -2.665902 | 3.425816                       | 745.3385    | 1418.1614   |           |
| O                                                                                 | -0.543561   | -4.163688 | 1.863298                       | 779.1409    | 1436.5175   |           |

**A1O2-NO<sub>2</sub>-PW**

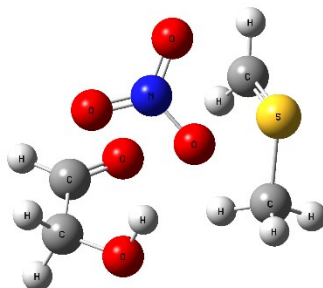

| Method                 |           | Ee          | E+ZPE                          | $\Delta H$  | $\Delta G$  |           |
|------------------------|-----------|-------------|--------------------------------|-------------|-------------|-----------|
| M06-2X/GD3/cc-pVTZ     |           | -986.691867 | -986.545696                    | -986.530853 | -986.586895 |           |
| M06-2X/DG3/aug-cc-pVTZ |           | -986.702874 | -986.556981                    | -986.54206  | -986.598462 |           |
| MN15/cc-pVTZ           |           | -986.190583 | -986.045448                    | -986.030412 | -986.087109 |           |
| MN15/aug-cc-pVTZ       |           | -986.206428 | -986.061634                    | -986.046537 | -986.103513 |           |
| Coordinates (xyz)      |           |             | Vibrations (cm <sup>-1</sup> ) |             |             |           |
| C                      | 0.093472  | 0.010928    | 0.083329                       | 44.9942     | 735.5701    | 1460.5452 |
| C                      | -0.181714 | 0.285933    | 1.534651                       | 71.3202     | 742.1799    | 1466.1513 |
| C                      | 2.858320  | -0.173672   | 4.244091                       | 79.1798     | 776.99      | 1475.6736 |
| S                      | 3.870489  | -0.679014   | 3.121014                       | 92.232      | 871.4538    | 1591.4673 |
| C                      | 3.857332  | 0.605622    | 1.864279                       | 119.9503    | 882.5214    | 1844.6528 |
| H                      | -0.389536 | 0.810118    | -0.489766                      | 125.1507    | 928.461     | 2973.9151 |
| H                      | -0.427797 | -0.920918   | -0.164932                      | 138.2382    | 930.9546    | 3035.617  |
| H                      | 2.765896  | -0.794321   | 5.123913                       | 149.32      | 995.7424    | 3067.8884 |
| H                      | 2.18794   | 0.658652    | 4.08338                        | 174.0439    | 1045.3487   | 3084.4758 |
| H                      | 4.242944  | 0.145357    | 0.959545                       | 187.8305    | 1092.2877   | 3174.2508 |
| H                      | 2.828408  | 0.923294    | 1.712067                       | 203.0951    | 1102.7933   | 3192.447  |
| H                      | 4.506317  | 1.409501    | 2.200788                       | 217.7011    | 1123.553    | 3197.0384 |
| H                      | 1.848724  | -0.773753   | 0.221107                       | 227.5914    | 1182.9439   | 3292.7283 |
| O                      | 1.445196  | -0.017379   | -0.240184                      | 252.8896    | 1263.991    | 3633.899  |
| H                      | -1.247468 | 0.245816    | 1.824687                       | 301.5457    | 1348.1141   |           |
| O                      | 0.663676  | 0.545223    | 2.353359                       | 344.2071    | 1376.797    |           |
| O                      | 2.733272  | -1.867794   | 1.476543                       | 621.7213    | 1400.4132   |           |
| N                      | 1.75938   | -2.462249   | 2.084201                       | 640.6975    | 1414.2832   |           |
| O                      | 1.960709  | -2.918922   | 3.198881                       | 715.9417    | 1449.8274   |           |
| O                      | 0.679736  | -2.514352   | 1.513474                       | 722.5586    | 1454.3759   |           |

**A2O2-NO<sub>2</sub>**

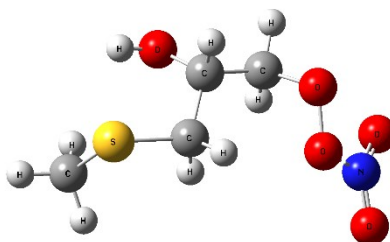

| <b>A2O2-NO<sub>2</sub></b>                                                         |           |                      |              |                                     |             |           |
|------------------------------------------------------------------------------------|-----------|----------------------|--------------|-------------------------------------|-------------|-----------|
| 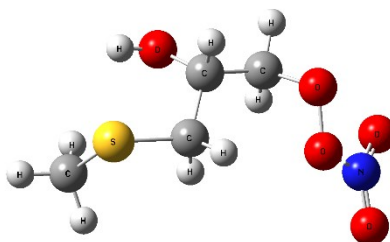 |           |                      |              |                                     |             |           |
| <b>Method</b>                                                                      |           | <b>E<sub>c</sub></b> | <b>E+ZPE</b> | <b>ΔH</b>                           | <b>ΔG</b>   |           |
| M06-2X/GD3/cc-pVTZ                                                                 |           | -986.663129          | -986.512375  | -986.499097                         | -986.552975 |           |
| M06-2X/DG3/aug-cc-pVTZ                                                             |           | -986.67314           | -986.522608  | -986.509294                         | -986.563282 |           |
| MN15/cc-pVTZ                                                                       |           | -986.1633            | -986.013568  | -986.000227                         | -986.054104 |           |
| MN15/aug-cc-pVTZ                                                                   |           | -986.177869          | -986.028501  | -986.015116                         | -986.06913  |           |
| <b>Coordinates (xyz)</b>                                                           |           |                      |              | <b>Vibrations (cm<sup>-1</sup>)</b> |             |           |
| C                                                                                  | 0.142050  | -0.132091            | 0.076305     | 34.7767                             | 790.6216    | 1462.5489 |
| C                                                                                  | 0.043362  | -0.051907            | 1.591059     | 44.5665                             | 846.0566    | 1475.1876 |
| C                                                                                  | 1.402184  | -0.080468            | 2.284291     | 75.586                              | 863.1229    | 1482.2158 |
| S                                                                                  | 1.239529  | -0.249279            | 4.089253     | 90.4621                             | 893.6401    | 1495.5705 |
| C                                                                                  | 1.542957  | -2.027817            | 4.264783     | 95.8157                             | 983.9573    | 1826.7588 |
| H                                                                                  | 0.624596  | -1.05866             | -0.238085    | 122.3319                            | 986.418     | 3032.513  |
| H                                                                                  | -0.462571 | 0.883824             | 1.854213     | 171.6365                            | 1010.2995   | 3076.0094 |
| H                                                                                  | 1.945301  | 0.84128              | 2.087223     | 189.7382                            | 1055.8785   | 3083.9371 |
| H                                                                                  | 2.004199  | -0.913834            | 1.920284     | 229.2387                            | 1082.4509   | 3088.6221 |
| H                                                                                  | 1.396688  | -2.271463            | 5.314163     | 292.5774                            | 1104.1541   | 3149.0876 |
| H                                                                                  | 0.850356  | -2.605516            | 3.657814     | 317.1481                            | 1161.5405   | 3152.0088 |
| H                                                                                  | 2.567126  | -2.262177            | 3.983948     | 413.7136                            | 1225.9494   | 3161.142  |
| O                                                                                  | -0.75526  | -1.15991             | 1.946742     | 427.9919                            | 1254.0193   | 3172.3438 |
| H                                                                                  | -0.88041  | -1.125102            | 2.902346     | 443.0097                            | 1271.5971   | 3813.5348 |
| H                                                                                  | -0.855183 | -0.093483            | -0.358926    | 471.1681                            | 1306.9063   |           |
| O                                                                                  | 0.816653  | 0.991748             | -0.491303    | 568.4068                            | 1357.4327   |           |
| O                                                                                  | 2.187184  | 0.796819             | -0.418815    | 593.4397                            | 1365.4456   |           |
| N                                                                                  | 2.652841  | 0.174399             | -1.641399    | 716.9096                            | 1401.5706   |           |
| O                                                                                  | 3.833626  | 0.075274             | -1.629401    | 730.4767                            | 1411.2844   |           |
| O                                                                                  | 1.835788  | -0.142077            | -2.434962    | 767.3759                            | 1435.5785   |           |

3. Intramolecular rearrangement mechanism in RO<sub>2</sub> intermediates (A1O2-A2O2)

| A1_Im1                                                                            |           |             |             |                                |             |           |
|-----------------------------------------------------------------------------------|-----------|-------------|-------------|--------------------------------|-------------|-----------|
| 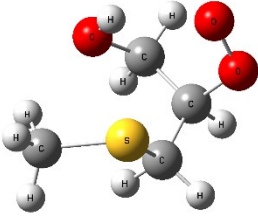 |           |             |             |                                |             |           |
| Method                                                                            |           | Ee          | E+ZPE       | ΔH                             | ΔG          |           |
| M06-2X/GD3/cc-pVTZ                                                                |           | -781.547593 | -781.411338 | -781.400765                    | -781.446998 |           |
| M06-2X/DG3/aug-cc-pVTZ                                                            |           | -781.55404  | -781.417921 | -781.407321                    | -781.453627 |           |
| MN15/cc-pVTZ                                                                      |           | -781.178299 | -781.042763 | -781.032171                    | -781.07828  |           |
| MN15/aug-cc-pVTZ                                                                  |           | -781.188915 | -781.053596 | -781.042966                    | -781.08921  |           |
| SVECV-f12                                                                         |           | -781.4141   | -781.277981 | -781.267381                    | -781.313687 |           |
| Coordinates (xyz)                                                                 |           |             |             | Vibrations (cm <sup>-1</sup> ) |             |           |
| C                                                                                 | 0.054596  | -0.012950   | -0.010353   | 64.7925                        | 938.2931    | 1496.0619 |
| C                                                                                 | 0.021564  | -0.000231   | 1.508299    | 93.9673                        | 981.8735    | 1500.5351 |
| C                                                                                 | 1.366853  | -0.003036   | 2.234704    | 123.4313                       | 983.7647    | 3045.0999 |
| S                                                                                 | 2.287721  | -1.571301   | 2.241042    | 166.5044                       | 1024.2309   | 3072.8755 |
| C                                                                                 | 3.629275  | -1.179658   | 1.092217    | 181.7545                       | 1089.3528   | 3077.4282 |
| H                                                                                 | 0.354934  | 0.983366    | -0.337221   | 211.1167                       | 1152.7383   | 3090.8093 |
| H                                                                                 | -0.965368 | -0.188471   | -0.367429   | 241.4585                       | 1219.9765   | 3109.3225 |
| H                                                                                 | 1.187925  | 0.257883    | 3.275766    | 288.4625                       | 1242.0232   | 3142.291  |
| H                                                                                 | 2.002153  | 0.769593    | 1.802148    | 310.1428                       | 1267.46     | 3159.3685 |
| H                                                                                 | 4.247218  | -2.072331   | 1.028555    | 428.0757                       | 1277.6353   | 3174.3564 |
| H                                                                                 | 3.227466  | -0.940725   | 0.111659    | 484.0718                       | 1343.2854   | 3825.791  |
| H                                                                                 | 4.232959  | -0.360753   | 1.477196    | 508.541                        | 1358.9733   |           |
| H                                                                                 | 0.763772  | -1.785742   | -0.226006   | 668.7668                       | 1398.7832   |           |
| O                                                                                 | 0.963944  | -0.913792   | -0.585904   | 741.3595                       | 1404.0621   |           |
| H                                                                                 | -0.528678 | 0.890116    | 1.82188     | 799.5151                       | 1442.4292   |           |
| O                                                                                 | -0.795208 | -1.075431   | 2.042133    | 826.549                        | 1457.3022   |           |
| O                                                                                 | -0.715089 | -2.167845   | 1.341427    | 860.3876                       | 1474.1059   |           |

**A1\_Im1\_1**

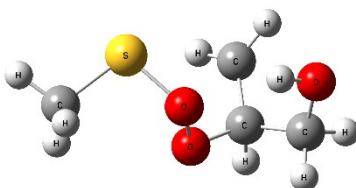

| Method                 |           | Ee          | E+ZPE                          | $\Delta H$  | $\Delta G$  |           |
|------------------------|-----------|-------------|--------------------------------|-------------|-------------|-----------|
| M06-2X/GD3/cc-pVTZ     |           | -781.50707  | -781.375035                    | -781.363661 | -781.411849 |           |
| M06-2X/DG3/aug-cc-pVTZ |           | -781.514271 | -781.38249                     | -781.371034 | -781.419452 |           |
| MN15/cc-pVTZ           |           | -781.13793  | -781.006481                    | -780.995055 | -781.043346 |           |
| MN15/aug-cc-pVTZ       |           | -781.14075  | -781.010186                    | -780.998558 | -781.046694 |           |
| Coordinates (xyz)      |           |             | Vibrations (cm <sup>-1</sup> ) |             |             |           |
| C                      | -0.092108 | 0.296657    | 0.045912                       | 49.9651     | 813.6386    | 1484.8209 |
| C                      | -0.014873 | -0.274084   | 1.457104                       | 76.3515     | 861.4778    | 1497.4549 |
| C                      | 1.272801  | 0.005827    | 2.136295                       | 94.2575     | 941.7931    | 3033.1134 |
| S                      | 1.685598  | -3.208341   | 1.619757                       | 144.9072    | 973.1295    | 3047.583  |
| C                      | 0.706951  | -4.667213   | 1.998357                       | 166.0203    | 977.4171    | 3072.607  |
| H                      | -0.18431  | 1.380819    | 0.118282                       | 167.6569    | 993.513     | 3110.3081 |
| H                      | -0.995591 | -0.093732   | -0.432275                      | 203.7104    | 1020.9739   | 3160.0635 |
| H                      | 1.393382  | -0.241331   | 3.17889                        | 280.1655    | 1130.5002   | 3175.9232 |
| H                      | 2.094087  | 0.441042    | 1.590406                       | 336.5712    | 1166.8592   | 3186.495  |
| H                      | 1.345462  | -5.306688   | 2.607301                       | 350.2052    | 1244.7575   | 3299.1662 |
| H                      | -0.173421 | -4.386417   | 2.570194                       | 430.3489    | 1320.9344   | 3859.4175 |
| H                      | 0.430719  | -5.188121   | 1.085793                       | 464.9032    | 1339.233    |           |
| O                      | 1.053509  | 0.049219    | -0.73662                       | 486.1659    | 1342.6015   |           |
| H                      | 1.189996  | -0.902495   | -0.765423                      | 545.7257    | 1391.7049   |           |
| H                      | -0.854497 | 0.133617    | 2.032895                       | 721.4389    | 1435.8884   |           |
| O                      | -0.36181  | -1.673895   | 1.481063                       | 738.7823    | 1454.3964   |           |
| O                      | 0.600565  | -2.390588   | 0.678019                       | 790.4009    | 1462.0139   |           |

**A1\_Im1\_2**

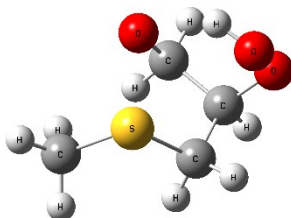

| Method                 |           | Ee          | E+ZPE                          | $\Delta H$  | $\Delta G$  |           |
|------------------------|-----------|-------------|--------------------------------|-------------|-------------|-----------|
| M06-2X/GD3/cc-pVTZ     |           | -781.518973 | -781.383549                    | -781.373402 | -781.418123 |           |
| M06-2X/DG3/aug-cc-pVTZ |           | -781.525919 | -781.390476                    | -781.380366 | -781.424953 |           |
| MN15/cc-pVTZ           |           | -781.153486 | -781.018804                    | -781.008648 | -781.053316 |           |
| MN15/aug-cc-pVTZ       |           | -781.113247 | -780.98078                     | -780.969748 | -781.017539 |           |
| Coordinates (xyz)      |           |             | Vibrations (cm <sup>-1</sup> ) |             |             |           |
| C                      | 0.001265  | -0.006335   | -0.001857                      | 108.9253    | 955.2663    | 1484.4635 |
| C                      | -0.002876 | 0.004697    | 1.526557                       | 130.6075    | 961.1401    | 1501.9991 |
| C                      | 1.439197  | 0.008337    | 2.038425                       | 141.8173    | 971.4408    | 2951.6858 |
| S                      | 2.52659   | -1.017453   | 1.017126                       | 181.3761    | 1008.4754   | 3014.3211 |
| C                      | 3.328005  | 0.218334    | -0.018309                      | 208.6913    | 1030.6771   | 3078.6531 |
| H                      | 0.416484  | 0.947917    | -0.366802                      | 237.8956    | 1111.1325   | 3080.8413 |
| H                      | -1.043496 | -0.061049   | -0.33681                       | 253.0029    | 1146.6874   | 3103.1527 |
| H                      | 1.470971  | -0.397883   | 3.046521                       | 327.0027    | 1175.3246   | 3165.3819 |
| H                      | 1.839196  | 1.02044     | 2.042568                       | 355.0743    | 1236.8727   | 3168.1515 |
| H                      | 4.041021  | -0.313303   | -0.642727                      | 433.0839    | 1261.9528   | 3178.2471 |
| H                      | 2.593502  | 0.708033    | -0.652243                      | 503.4133    | 1315.1017   | 3622.4281 |
| H                      | 3.855851  | 0.94232     | 0.598594                       | 607.6314    | 1342.2957   |           |
| O                      | 0.673766  | -1.110999   | -0.479598                      | 697.726     | 1353.7226   |           |
| H                      | 0.074725  | -2.346831   | 0.929331                       | 748.2079    | 1377.7457   |           |
| H                      | -0.533726 | 0.88326     | 1.901148                       | 819.4509    | 1443.7093   |           |
| O                      | -0.750419 | -1.073646   | 2.052891                       | 837.9543    | 1465.7142   |           |
| O                      | -0.019431 | -2.286277   | 1.898904                       | 885.4496    | 1468.5893   |           |

**A1\_Im2**

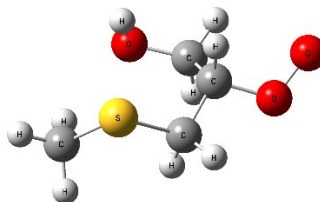

| <b>Method</b>            |           |          |           |         |          |           | <b>Ee</b>                           |           |          | <b>E+ZPE</b> |        |          | <b><math>\Delta H</math></b> |   |          | <b><math>\Delta G</math></b> |          |          |           |           |   |          |           |          |          |           |           |   |          |           |          |         |           |           |   |          |         |           |          |           |           |   |           |          |           |          |           |           |   |           |           |          |          |           |           |   |          |          |          |          |           |           |   |          |          |        |          |           |           |   |          |           |         |          |          |           |   |          |           |           |          |           |  |   |          |           |          |          |           |  |   |          |           |           |          |           |  |   |          |           |           |          |           |  |   |           |          |          |          |           |  |   |          |          |          |          |           |  |
|--------------------------|-----------|----------|-----------|---------|----------|-----------|-------------------------------------|-----------|----------|--------------|--------|----------|------------------------------|---|----------|------------------------------|----------|----------|-----------|-----------|---|----------|-----------|----------|----------|-----------|-----------|---|----------|-----------|----------|---------|-----------|-----------|---|----------|---------|-----------|----------|-----------|-----------|---|-----------|----------|-----------|----------|-----------|-----------|---|-----------|-----------|----------|----------|-----------|-----------|---|----------|----------|----------|----------|-----------|-----------|---|----------|----------|--------|----------|-----------|-----------|---|----------|-----------|---------|----------|----------|-----------|---|----------|-----------|-----------|----------|-----------|--|---|----------|-----------|----------|----------|-----------|--|---|----------|-----------|-----------|----------|-----------|--|---|----------|-----------|-----------|----------|-----------|--|---|-----------|----------|----------|----------|-----------|--|---|----------|----------|----------|----------|-----------|--|
| M06-2X/GD3/cc-pVTZ       |           |          |           |         |          |           | -781.545523                         |           |          | -781.409882  |        |          | -781.398781                  |   |          | -781.446837                  |          |          |           |           |   |          |           |          |          |           |           |   |          |           |          |         |           |           |   |          |         |           |          |           |           |   |           |          |           |          |           |           |   |           |           |          |          |           |           |   |          |          |          |          |           |           |   |          |          |        |          |           |           |   |          |           |         |          |          |           |   |          |           |           |          |           |  |   |          |           |          |          |           |  |   |          |           |           |          |           |  |   |          |           |           |          |           |  |   |           |          |          |          |           |  |   |          |          |          |          |           |  |
| M06-2X/DG3/aug-cc-pVTZ   |           |          |           |         |          |           | -781.552317                         |           |          | -781.416749  |        |          | -781.405662                  |   |          | -781.453816                  |          |          |           |           |   |          |           |          |          |           |           |   |          |           |          |         |           |           |   |          |         |           |          |           |           |   |           |          |           |          |           |           |   |           |           |          |          |           |           |   |          |          |          |          |           |           |   |          |          |        |          |           |           |   |          |           |         |          |          |           |   |          |           |           |          |           |  |   |          |           |          |          |           |  |   |          |           |           |          |           |  |   |          |           |           |          |           |  |   |           |          |          |          |           |  |   |          |          |          |          |           |  |
| MN15/cc-pVTZ             |           |          |           |         |          |           | -781.175816                         |           |          | -781.040875  |        |          | -781.02978                   |   |          | -781.077525                  |          |          |           |           |   |          |           |          |          |           |           |   |          |           |          |         |           |           |   |          |         |           |          |           |           |   |           |          |           |          |           |           |   |           |           |          |          |           |           |   |          |          |          |          |           |           |   |          |          |        |          |           |           |   |          |           |         |          |          |           |   |          |           |           |          |           |  |   |          |           |          |          |           |  |   |          |           |           |          |           |  |   |          |           |           |          |           |  |   |           |          |          |          |           |  |   |          |          |          |          |           |  |
| MN15/aug-cc-pVTZ         |           |          |           |         |          |           | -781.186311                         |           |          | -781.05162   |        |          | -781.040577                  |   |          | -781.088107                  |          |          |           |           |   |          |           |          |          |           |           |   |          |           |          |         |           |           |   |          |         |           |          |           |           |   |           |          |           |          |           |           |   |           |           |          |          |           |           |   |          |          |          |          |           |           |   |          |          |        |          |           |           |   |          |           |         |          |          |           |   |          |           |           |          |           |  |   |          |           |          |          |           |  |   |          |           |           |          |           |  |   |          |           |           |          |           |  |   |           |          |          |          |           |  |   |          |          |          |          |           |  |
| <b>Coordinates (xyz)</b> |           |          |           |         |          |           | <b>Vibrations (cm<sup>-1</sup>)</b> |           |          |              |        |          |                              |   |          |                              |          |          |           |           |   |          |           |          |          |           |           |   |          |           |          |         |           |           |   |          |         |           |          |           |           |   |           |          |           |          |           |           |   |           |           |          |          |           |           |   |          |          |          |          |           |           |   |          |          |        |          |           |           |   |          |           |         |          |          |           |   |          |           |           |          |           |  |   |          |           |          |          |           |  |   |          |           |           |          |           |  |   |          |           |           |          |           |  |   |           |          |          |          |           |  |   |          |          |          |          |           |  |
| C                        | -0.270464 | 0.139268 | -0.008262 | 35.6848 | 984.4445 | 1498.1118 | C                                   | -0.095405 | 0.049170 | 1.502913     | 78.912 | 986.7928 | 1524.2004                    | C | 1.341921 | 0.024134                     | 1.995998 | 103.7003 | 1019.9357 | 3059.8104 | S | 2.078871 | -1.639997 | 1.955411 | 148.0597 | 1052.3738 | 3076.5899 | C | 3.251215 | -1.462275 | 0.588396 | 168.722 | 1132.2585 | 3083.8898 | H | 0.188663 | 1.06568 | -0.356572 | 190.9317 | 1160.5479 | 3090.0996 | H | -1.339978 | 0.184612 | -0.228006 | 249.8516 | 1180.1844 | 3114.0829 | H | -0.656024 | -0.792876 | 1.912982 | 266.7882 | 1261.9322 | 3143.4002 | H | 1.355959 | 0.362331 | 3.030646 | 311.0638 | 1275.8675 | 3163.5787 | H | 1.968089 | 0.698104 | 1.4123 | 316.7874 | 1290.6523 | 3177.0465 | H | 3.728918 | -2.431528 | 0.46583 | 405.1354 | 1324.383 | 3851.4755 | H | 2.728146 | -1.192601 | -0.324548 | 442.3615 | 1351.8021 |  | H | 4.010034 | -0.723824 | 0.835762 | 581.3268 | 1378.6111 |  | O | 0.362579 | -0.912313 | -0.699358 | 726.7641 | 1394.0047 |  | H | 0.141826 | -1.750403 | -0.281532 | 786.8436 | 1431.9429 |  | O | -0.690785 | 1.250226 | 2.061285 | 826.9865 | 1470.6166 |  | O | -1.98797 | 1.209139 | 2.017496 | 913.3443 | 1475.5571 |  |



**A1\_Im2\_1**

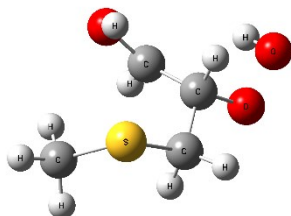

| Method                 |           | Ee          | E+ZPE                          | $\Delta H$  | $\Delta G$  |           |
|------------------------|-----------|-------------|--------------------------------|-------------|-------------|-----------|
| M06-2X/GD3/cc-pVTZ     |           | -781.532934 | -781.399072                    | -781.387675 | -781.435377 |           |
| M06-2X/DG3/aug-cc-pVTZ |           | -781.540568 | -781.407069                    | -781.395546 | -781.44367  |           |
| MN15/cc-pVTZ           |           | -781.165429 | -781.032751                    | -781.021152 | -781.069225 |           |
| MN15/aug-cc-pVTZ       |           | -781.17708  | -781.044911                    | -781.033159 | -781.081668 |           |
| Coordinates (xyz)      |           |             | Vibrations (cm <sup>-1</sup> ) |             |             |           |
| C                      | -0.022737 | -0.019188   | -0.006463                      | 67.6382     | 845.8587    | 1480.0247 |
| C                      | -0.010545 | 0.005223    | 1.482769                       | 83.3762     | 966.8326    | 1488.6314 |
| C                      | 1.378162  | -0.005053   | 2.125053                       | 138.4358    | 985.6329    | 3032.5743 |
| S                      | 2.316769  | -1.500875   | 1.706402                       | 148.1472    | 1017.0091   | 3078.0792 |
| C                      | 3.204103  | -0.94281    | 0.229981                       | 176.4583    | 1042.1141   | 3086.7869 |
| H                      | 0.256068  | 0.852388    | -0.583275                      | 184.2235    | 1085.3873   | 3145.602  |
| H                      | -2.091721 | 1.340509    | 0.792985                       | 248.5905    | 1127.4349   | 3164.0111 |
| H                      | -0.57529  | -0.854112   | 1.863099                       | 262.4954    | 1166.7022   | 3175.3963 |
| H                      | 1.270297  | 0.015369    | 3.208208                       | 274.0852    | 1226.6122   | 3203.6959 |
| H                      | 1.948677  | 0.871413    | 1.819082                       | 315.7515    | 1261.5931   | 3780.1551 |
| H                      | 3.850542  | -1.764444   | -0.069266                      | 341.9889    | 1298.0081   | 3805.6933 |
| H                      | 2.519573  | -0.712367   | -0.581699                      | 386.5332    | 1327.4462   |           |
| H                      | 3.818589  | -0.078379   | 0.470772                       | 455.6607    | 1357.4137   |           |
| O                      | 0.04223   | -1.192241   | -0.680965                      | 552.5143    | 1382.3482   |           |
| H                      | 0.172617  | -1.92034    | -0.060648                      | 577.9527    | 1416.7295   |           |
| O                      | -0.616795 | 1.201374    | 1.9548                         | 724.3753    | 1454.4494   |           |
| O                      | -2.01357  | 1.113138    | 1.730189                       | 784.0244    | 1474.6511   |           |

**A1\_Im3**

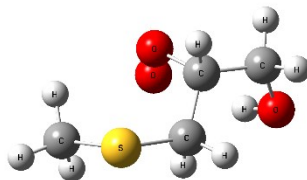

| <b>Method</b>            |          |           |           |         |          |           | <b>Ee</b>                           |          |          | <b>E+ZPE</b> |        |          | <b><math>\Delta</math>H</b> |   |          | <b><math>\Delta</math>G</b> |          |          |          |           |   |          |          |          |          |           |           |   |          |          |          |          |           |           |   |          |          |           |          |           |           |   |           |           |          |          |           |           |   |          |          |         |          |           |           |   |          |           |         |          |           |           |   |          |           |          |          |           |           |   |          |           |          |          |           |           |   |         |           |          |          |           |  |   |          |           |           |          |           |  |   |         |           |           |          |           |  |   |           |          |          |          |         |  |   |           |           |          |          |           |  |   |           |           |          |          |           |  |
|--------------------------|----------|-----------|-----------|---------|----------|-----------|-------------------------------------|----------|----------|--------------|--------|----------|-----------------------------|---|----------|-----------------------------|----------|----------|----------|-----------|---|----------|----------|----------|----------|-----------|-----------|---|----------|----------|----------|----------|-----------|-----------|---|----------|----------|-----------|----------|-----------|-----------|---|-----------|-----------|----------|----------|-----------|-----------|---|----------|----------|---------|----------|-----------|-----------|---|----------|-----------|---------|----------|-----------|-----------|---|----------|-----------|----------|----------|-----------|-----------|---|----------|-----------|----------|----------|-----------|-----------|---|---------|-----------|----------|----------|-----------|--|---|----------|-----------|-----------|----------|-----------|--|---|---------|-----------|-----------|----------|-----------|--|---|-----------|----------|----------|----------|---------|--|---|-----------|-----------|----------|----------|-----------|--|---|-----------|-----------|----------|----------|-----------|--|
| M06-2X/GD3/cc-pVTZ       |          |           |           |         |          |           | -781.55176                          |          |          | -781.415681  |        |          | -781.404915                 |   |          | -781.452349                 |          |          |          |           |   |          |          |          |          |           |           |   |          |          |          |          |           |           |   |          |          |           |          |           |           |   |           |           |          |          |           |           |   |          |          |         |          |           |           |   |          |           |         |          |           |           |   |          |           |          |          |           |           |   |          |           |          |          |           |           |   |         |           |          |          |           |  |   |          |           |           |          |           |  |   |         |           |           |          |           |  |   |           |          |          |          |         |  |   |           |           |          |          |           |  |   |           |           |          |          |           |  |
| M06-2X/DG3/aug-cc-pVTZ   |          |           |           |         |          |           | -781.558488                         |          |          | -781.422483  |        |          | -781.41176                  |   |          | -781.458824                 |          |          |          |           |   |          |          |          |          |           |           |   |          |          |          |          |           |           |   |          |          |           |          |           |           |   |           |           |          |          |           |           |   |          |          |         |          |           |           |   |          |           |         |          |           |           |   |          |           |          |          |           |           |   |          |           |          |          |           |           |   |         |           |          |          |           |  |   |          |           |           |          |           |  |   |         |           |           |          |           |  |   |           |          |          |          |         |  |   |           |           |          |          |           |  |   |           |           |          |          |           |  |
| MN15/cc-pVTZ             |          |           |           |         |          |           | -781.18228                          |          |          | -781.046871  |        |          | -781.036139                 |   |          | -781.083138                 |          |          |          |           |   |          |          |          |          |           |           |   |          |          |          |          |           |           |   |          |          |           |          |           |           |   |           |           |          |          |           |           |   |          |          |         |          |           |           |   |          |           |         |          |           |           |   |          |           |          |          |           |           |   |          |           |          |          |           |           |   |         |           |          |          |           |  |   |          |           |           |          |           |  |   |         |           |           |          |           |  |   |           |          |          |          |         |  |   |           |           |          |          |           |  |   |           |           |          |          |           |  |
| MN15/aug-cc-pVTZ         |          |           |           |         |          |           | -781.193033                         |          |          | -781.057908  |        |          | -781.047131                 |   |          | -781.094289                 |          |          |          |           |   |          |          |          |          |           |           |   |          |          |          |          |           |           |   |          |          |           |          |           |           |   |           |           |          |          |           |           |   |          |          |         |          |           |           |   |          |           |         |          |           |           |   |          |           |          |          |           |           |   |          |           |          |          |           |           |   |         |           |          |          |           |  |   |          |           |           |          |           |  |   |         |           |           |          |           |  |   |           |          |          |          |         |  |   |           |           |          |          |           |  |   |           |           |          |          |           |  |
| <b>Coordinates (xyz)</b> |          |           |           |         |          |           | <b>Vibrations (cm<sup>-1</sup>)</b> |          |          |              |        |          |                             |   |          |                             |          |          |          |           |   |          |          |          |          |           |           |   |          |          |          |          |           |           |   |          |          |           |          |           |           |   |           |           |          |          |           |           |   |          |          |         |          |           |           |   |          |           |         |          |           |           |   |          |           |          |          |           |           |   |          |           |          |          |           |           |   |         |           |          |          |           |  |   |          |           |           |          |           |  |   |         |           |           |          |           |  |   |           |          |          |          |         |  |   |           |           |          |          |           |  |   |           |           |          |          |           |  |
| C                        | 0.003165 | -0.004597 | -0.010149 | 43.7237 | 964.8384 | 1493.5805 | C                                   | 0.005419 | 0.010907 | 1.513880     | 81.353 | 970.6104 | 1499.9069                   | C | 1.396950 | 0.020312                    | 2.117254 | 115.3522 | 981.6556 | 3042.9824 | S | 1.465045 | 0.317381 | 3.900493 | 150.1336 | 1033.6312 | 3076.8474 | C | 1.007962 | -1.31269 | 4.543725 | 189.8119 | 1103.5916 | 3093.2804 | H | 0.264338 | 0.996896 | -0.352768 | 214.3905 | 1149.8432 | 3111.6418 | H | -1.013022 | -0.223942 | -0.35357 | 248.8021 | 1216.5698 | 3118.2765 | H | 1.960854 | 0.829791 | 1.65434 | 278.0848 | 1235.9879 | 3145.7851 | H | 1.910654 | -0.909284 | 1.87754 | 323.0467 | 1251.5266 | 3162.3896 | H | 1.267614 | -1.308699 | 5.599414 | 407.4411 | 1278.6843 | 3179.1173 | H | -0.05361 | -1.509341 | 4.431154 | 466.4143 | 1336.1455 | 3841.6051 | H | 1.58365 | -2.086361 | 4.038943 | 498.1957 | 1361.4223 |  | H | 0.765786 | -1.764855 | -0.237621 | 678.0295 | 1392.6049 |  | O | 0.94427 | -0.881473 | -0.576706 | 725.3761 | 1408.4704 |  | H | -0.577389 | 0.857998 | 1.874898 | 787.2957 | 1434.27 |  | O | -0.753632 | -1.125108 | 2.022488 | 820.7603 | 1441.4524 |  | O | -0.271887 | -2.259696 | 1.616562 | 873.5514 | 1470.8013 |  |

**A1\_Im3\_1**

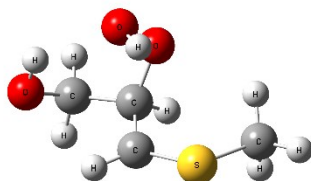

| Method                 |           | Ee          | E+ZPE                          | $\Delta H$  | $\Delta G$  |           |
|------------------------|-----------|-------------|--------------------------------|-------------|-------------|-----------|
| M06-2X/GD3/cc-pVTZ     |           | -781.539964 | -781.404941                    | -781.393933 | -781.440984 |           |
| M06-2X/DG3/aug-cc-pVTZ |           | -781.547205 | -781.412453                    | -781.401378 | -781.448613 |           |
| MN15/cc-pVTZ           |           | -781.172579 | -781.038209                    | -781.027235 | -781.07396  |           |
| MN15/aug-cc-pVTZ       |           | -781.184099 | -781.050043                    | -781.039013 | -781.08591  |           |
| Coordinates (xyz)      |           |             | Vibrations (cm <sup>-1</sup> ) |             |             |           |
| C                      | 0.002059  | 0.000977    | 0.008326                       | 58.1453     | 886.8851    | 1493.0538 |
| C                      | 0.010693  | -0.013433   | 1.532433                       | 95.7649     | 964.1947    | 1499.7321 |
| C                      | 1.388957  | 0.001433    | 2.088694                       | 112.1081    | 969.4666    | 3041.087  |
| S                      | 1.729733  | -0.120747   | 3.764459                       | 170.5933    | 993.8552    | 3051.1376 |
| C                      | 0.249709  | 0.581466    | 4.533166                       | 183.5625    | 999.3453    | 3081.2083 |
| H                      | 0.349838  | 0.976501    | -0.333041                      | 203.8943    | 1055.2961   | 3111.8214 |
| H                      | -1.03278  | -0.131815   | -0.32143                       | 235.5549    | 1141.3278   | 3169.6963 |
| H                      | 2.22509   | -0.218432   | 1.442                          | 300.4464    | 1154.7564   | 3182.9219 |
| H                      | 0.468055  | -2.449488   | 2.456766                       | 335.3735    | 1232.603    | 3225.2051 |
| H                      | 0.412002  | 0.530722    | 5.606253                       | 349.8856    | 1249.495    | 3765.0959 |
| H                      | 0.13601   | 1.621081    | 4.235137                       | 412.6941    | 1337.408    | 3845.6584 |
| H                      | -0.631927 | 0.005802    | 4.26643                        | 457.509     | 1346.4563   |           |
| H                      | 0.62685   | -1.813946   | -0.195729                      | 507.2277    | 1363.9048   |           |
| O                      | 0.854038  | -0.957858   | -0.573325                      | 566.0556    | 1404.9599   |           |
| H                      | -0.579485 | 0.840795    | 1.883098                       | 708.2951    | 1407.6987   |           |
| O                      | -0.781858 | -1.101829   | 2.054351                       | 743.9148    | 1441.4355   |           |
| O                      | -0.157143 | -2.335701   | 1.725863                       | 819.9695    | 1472.8005   |           |

**A1\_Im3\_2**

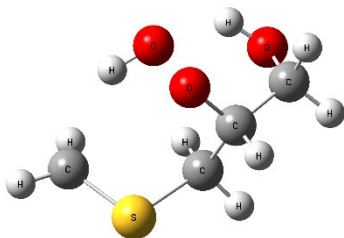

| Method                 |           | Ee          | E+ZPE                          | $\Delta H$  | $\Delta G$  |           |
|------------------------|-----------|-------------|--------------------------------|-------------|-------------|-----------|
| M06-2X/GD3/cc-pVTZ     |           | -781.536429 | -781.40125                     | -781.390711 | -781.436391 |           |
| M06-2X/DG3/aug-cc-pVTZ |           | -781.543537 | -781.408533                    | -781.397959 | -781.443742 |           |
| MN15/cc-pVTZ           |           | -781.168799 | -781.034355                    | -781.023778 | -781.069523 |           |
| MN15/aug-cc-pVTZ       |           | -781.180035 | -781.045897                    | -781.035274 | -781.08114  |           |
| Coordinates (xyz)      |           |             | Vibrations (cm <sup>-1</sup> ) |             |             |           |
| C                      | 0.241314  | -0.078327   | 0.159309                       | 74.6637     | 860.7009    | 1460.4867 |
| C                      | 0.699163  | -0.101949   | 1.615194                       | 109.4678    | 880.8471    | 1501.335  |
| C                      | 2.220903  | -0.068732   | 1.724927                       | 144.752     | 943.9658    | 3048.7651 |
| S                      | 2.818495  | -0.259762   | 3.426336                       | 175.0682    | 973.4428    | 3079.7817 |
| C                      | 3.16558   | -1.929969   | 3.479679                       | 198.8527    | 993.3743    | 3102.1548 |
| H                      | 0.479874  | 0.8955      | -0.270666                      | 263.5212    | 1072.0618   | 3107.644  |
| H                      | -0.846102 | -0.198496   | 0.148718                       | 271.0276    | 1123.0365   | 3150.9717 |
| H                      | 2.579704  | 0.892124    | 1.359465                       | 336.7432    | 1158.1035   | 3159.0596 |
| H                      | 2.671176  | -0.845904   | 1.111858                       | 362.2415    | 1209.8514   | 3278.0452 |
| H                      | 3.446323  | -2.322602   | 4.44455                        | 395.1084    | 1246.596    | 3667.779  |
| H                      | 1.256597  | -2.643545   | 2.483616                       | 466.2821    | 1266.7144   | 3844.9091 |
| H                      | 3.52483   | -2.424762   | 2.58682                        | 503.3845    | 1335.7305   |           |
| O                      | 0.87457   | -1.040641   | -0.652679                      | 525.1549    | 1377.2524   |           |
| H                      | 0.736895  | -1.901563   | -0.244239                      | 621.2206    | 1403.5731   |           |
| H                      | 0.274115  | 0.767457    | 2.123447                       | 679.5862    | 1409.7306   |           |
| O                      | 0.109083  | -1.170185   | 2.340374                       | 777.5869    | 1428.3714   |           |
| O                      | 0.587237  | -2.40594    | 1.819072                       | 829.3448    | 1441.4509   |           |

**A2\_Im1**

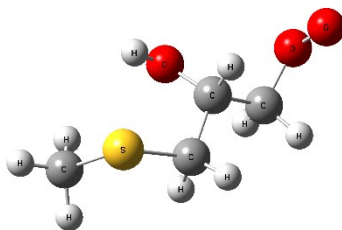

| <b>Method</b>            |           |           |           | <b>Ee</b>                           | <b>E+ZPE</b> | <b>ΔH</b>   | <b>ΔG</b>   |
|--------------------------|-----------|-----------|-----------|-------------------------------------|--------------|-------------|-------------|
| M06-2X/GD3/cc-pVTZ       |           |           |           | -781.55                             | -781.414064  | -781.403241 | -781.450671 |
| M06-2X/DG3/aug-cc-pVTZ   |           |           |           | -781.557104                         | -781.421353  | -781.410475 | -781.458127 |
| MN15/cc-pVTZ             |           |           |           | -781.180561                         | -781.045436  | -781.034567 | -781.082035 |
| MN15/aug-cc-pVTZ         |           |           |           | -781.191576                         | -781.05674   | -781.045829 | -781.093461 |
| <b>Coordinates (xyz)</b> |           |           |           | <b>Vibrations (cm<sup>-1</sup>)</b> |              |             |             |
| C                        | -0.090191 | -0.074416 | 0.073637  | 58.8005                             | 973.4326     | 1474.204    |             |
| C                        | -0.054383 | -0.073681 | 1.585327  | 61.7594                             | 981.8142     | 1495.8862   |             |
| C                        | 1.392866  | -0.022800 | 2.069869  | 103.5057                            | 987.7003     | 3050.0554   |             |
| S                        | 1.531087  | -0.244187 | 3.867824  | 127.2089                            | 1056.6569    | 3073.5482   |             |
| C                        | 1.900622  | -2.016902 | 3.937474  | 153.468                             | 1076.8611    | 3076.7839   |             |
| H                        | 0.541122  | 0.710601  | -0.340135 | 187.7221                            | 1163.6017    | 3095.6265   |             |
| H                        | 0.197849  | -1.051468 | -0.311492 | 264.3764                            | 1213.0913    | 3134.0533   |             |
| H                        | -0.58208  | 0.818682  | 1.937165  | 286.0617                            | 1240.3404    | 3160.6016   |             |
| H                        | 1.832552  | 0.943169  | 1.824559  | 333.0802                            | 1264.3052    | 3160.8918   |             |
| H                        | 1.987866  | -0.801344 | 1.589607  | 420.4043                            | 1282.7607    | 3173.5318   |             |
| H                        | 1.932139  | -2.291085 | 4.989043  | 455.6003                            | 1323.6395    | 3832.1869   |             |
| H                        | 1.131095  | -2.594999 | 3.432774  | 495.3429                            | 1355.9651    |             |             |
| H                        | 2.871275  | -2.215619 | 3.488693  | 590.3132                            | 1363.6384    |             |             |
| O                        | -0.717145 | -1.241611 | 2.015099  | 728.6701                            | 1405.7076    |             |             |
| H                        | -0.803177 | -1.189965 | 2.973303  | 778.749                             | 1436.4388    |             |             |
| O                        | -1.427695 | 0.138805  | -0.415996 | 844.6329                            | 1459.617     |             |             |
| O                        | -1.80396  | 1.366292  | -0.228266 | 912.442                             | 1472.8956    |             |             |

**A2\_Im1\_1**

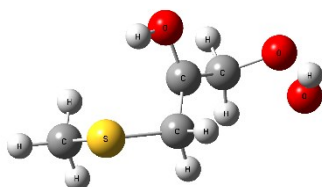

| Method                 | Ee          | E+ZPE       | $\Delta H$                     | $\Delta G$  |           |           |
|------------------------|-------------|-------------|--------------------------------|-------------|-----------|-----------|
| M06-2X/GD3/cc-pVTZ     | -781.541651 | -781.407412 | -781.395872                    | -781.445523 |           |           |
| M06-2X/DG3/aug-cc-pVTZ | -781.549741 | -781.41565  | -781.404083                    | -781.453696 |           |           |
| MN15/cc-pVTZ           | -781.174464 | -781.041017 | -781.02948                     | -781.078784 |           |           |
| MN15/aug-cc-pVTZ       | -781.186533 | -781.053342 | -781.04177                     | -781.091153 |           |           |
| Coordinates (xyz)      |             |             | Vibrations (cm <sup>-1</sup> ) |             |           |           |
| C                      | -0.113928   | -0.363582   | 0.302877                       | 36.5591     | 868.3312  | 1481.2002 |
| C                      | -0.155877   | -0.070007   | 1.747820                       | 51.7393     | 909.4763  | 1486.0198 |
| C                      | 0.989629    | 0.481733    | 2.511549                       | 82.3563     | 978.3066  | 3015.618  |
| S                      | 0.969969    | -0.031307   | 4.265981                       | 108.0526    | 995.0185  | 3067.2242 |
| C                      | 1.08452     | -1.822158   | 4.042863                       | 156.0413    | 1012.0847 | 3072.5751 |
| H                      | 0.885107    | -0.695698   | 0.013929                       | 195.3665    | 1047.8625 | 3119.9702 |
| H                      | -0.849008   | -1.126939   | 0.041698                       | 211.609     | 1141.4434 | 3123.7159 |
| H                      | -0.063109   | 2.460732    | 0.023097                       | 219.4313    | 1189.3217 | 3154.3475 |
| H                      | 0.966331    | 1.576667    | 2.559061                       | 301.882     | 1251.0418 | 3171.9097 |
| H                      | 1.930586    | 0.193543    | 2.045641                       | 347.1116    | 1271.1824 | 3735.5319 |
| H                      | 1.089482    | -2.26847    | 5.033821                       | 387.7254    | 1353.4627 | 3831.7374 |
| H                      | 0.231444    | -2.196205   | 3.480912                       | 463.4714    | 1358.6648 |           |
| H                      | 2.00879     | -2.078412   | 3.528987                       | 559.5822    | 1392.3719 |           |
| O                      | -1.396545   | 0.055404    | 2.277828                       | 640.1766    | 1414.2178 |           |
| H                      | -1.307245   | 0.191757    | 3.232966                       | 710.9744    | 1431.4297 |           |
| O                      | -0.496027   | 0.731       | -0.539776                      | 754.2736    | 1457.6863 |           |
| O                      | 0.475748    | 1.75568     | -0.354598                      | 829.3762    | 1471.6816 |           |

**P2\_Im1**

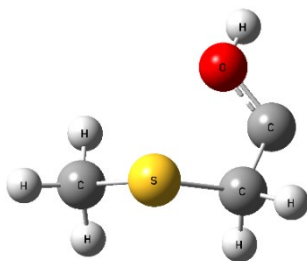

| Method                 |           |           |           | Ee                             | E+ZPE       | $\Delta H$  | $\Delta G$  |
|------------------------|-----------|-----------|-----------|--------------------------------|-------------|-------------|-------------|
| M06-2X/GD3/cc-pVTZ     |           |           |           | -591.235195                    | -591.149517 | -591.141984 | -591.18006  |
| M06-2X/DG3/aug-cc-pVTZ |           |           |           | -591.239233                    | -591.153606 | -591.146067 | -591.184166 |
| MN15/cc-pVTZ           |           |           |           | -590.991987                    | -590.906738 | -590.89918  | -590.937269 |
| MN15/aug-cc-pVTZ       |           |           |           | -590.998764                    | -590.913635 | -590.90606  | -590.944224 |
| Coordinates (xyz)      |           |           |           | Vibrations (cm <sup>-1</sup> ) |             |             |             |
| C                      | -0.029247 | -0.028885 | 0.064096  | 90.1314                        | 973.3393    | 3074.0188   |             |
| C                      | -0.007268 | -0.068110 | 1.558301  | 134.2221                       | 995.4962    | 3095.2009   |             |
| S                      | 1.543040  | 0.004580  | 2.502620  | 179.2651                       | 1165.7046   | 3156.0152   |             |
| C                      | 1.99603   | 1.729782  | 2.201249  | 221.7954                       | 1234.0988   | 3171.2702   |             |
| H                      | -0.509453 | -0.999677 | 1.83287   | 272.4349                       | 1325.8928   | 3811.0729   |             |
| H                      | -0.692529 | 0.719373  | 1.889026  | 591.579                        | 1355.8046   |             |             |
| H                      | 2.86823   | 1.939534  | 2.815339  | 635.2784                       | 1365.4995   |             |             |
| H                      | 2.245226  | 1.892037  | 1.156456  | 728.3058                       | 1412.4799   |             |             |
| H                      | 1.186539  | 2.392425  | 2.502324  | 767.9368                       | 1474.2189   |             |             |
| O                      | 1.181106  | 0.098956  | -0.402428 | 876.5909                       | 1492.4247   |             |             |
| H                      | 1.137483  | 0.113036  | -1.36609  | 934.3116                       | 3051.5754   |             |             |

**A2\_Im1\_2**

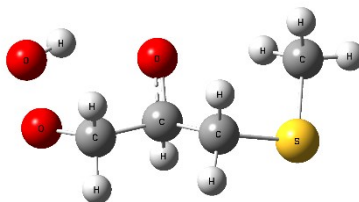

| Method                 | Ee          |           |           | E+ZPE                          | $\Delta H$  | $\Delta G$  |
|------------------------|-------------|-----------|-----------|--------------------------------|-------------|-------------|
| M06-2X/GD3/cc-pVTZ     | -781.518913 |           |           | -781.384892                    | -781.374165 | -781.420962 |
| M06-2X/DG3/aug-cc-pVTZ | -781.525946 |           |           | -781.392052                    | -781.381313 | -781.428137 |
| MN15/cc-pVTZ           | -781.150934 |           |           | -781.017837                    | -781.007064 | -781.054007 |
| MN15/aug-cc-pVTZ       | -781.161967 |           |           | -781.029101                    | -781.018322 | -781.065273 |
| Coordinates (xyz)      |             |           |           | Vibrations (cm <sup>-1</sup> ) |             |             |
| C                      | -0.008452   | 0.015048  | 0.003923  | 62.7667                        | 910.0094    | 1469.292    |
| C                      | 0.006337    | -0.036014 | 1.589599  | 80.8409                        | 961.1252    | 1475.1545   |
| C                      | 1.472418    | -0.025052 | 2.040043  | 101.2277                       | 972.5901    | 2999.8338   |
| S                      | 1.652975    | 0.386727  | 3.786186  | 172.4149                       | 1000.0846   | 3060.0542   |
| C                      | 0.772783    | -1.010465 | 4.511993  | 213.333                        | 1024.2202   | 3072.4685   |
| H                      | 0.446394    | 0.963022  | -0.282556 | 226.1471                       | 1109.0807   | 3079.5708   |
| H                      | 0.552528    | -0.834656 | -0.385406 | 233.0509                       | 1157.8008   | 3133.1484   |
| H                      | -0.522774   | 0.869761  | 1.91765   | 299.913                        | 1176.1652   | 3141.7512   |
| H                      | 2.032572    | 0.738459  | 1.500036  | 354.1925                       | 1242.93     | 3152.7717   |
| H                      | 1.910878    | -1.001697 | 1.832032  | 391.8292                       | 1276.2412   | 3169.5472   |
| H                      | 0.833352    | -0.894477 | 5.591242  | 449.342                        | 1297.0725   | 3669.3288   |
| H                      | -0.273189   | -1.010013 | 4.205286  | 475.2698                       | 1340.5271   |             |
| H                      | 1.235491    | -1.949984 | 4.218641  | 571.7028                       | 1362.0322   |             |
| O                      | -0.649538   | -1.16189  | 1.916085  | 724.6958                       | 1373.0267   |             |
| H                      | -1.985201   | -1.43886  | 0.449471  | 768.9792                       | 1441.7184   |             |
| O                      | -1.303814   | 0.035153  | -0.493522 | 800.5087                       | 1460.3883   |             |
| O                      | -1.802805   | -1.287718 | -0.495361 | 857.0227                       | 1461.5181   |             |



**A2\_Im2**

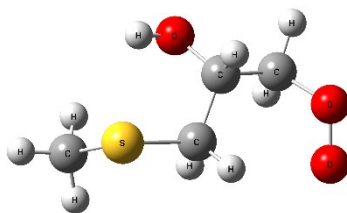

| Method                 |           | Ee          | E+ZPE                          | $\Delta H$  | $\Delta G$  |           |
|------------------------|-----------|-------------|--------------------------------|-------------|-------------|-----------|
| M06-2X/GD3/cc-pVTZ     |           | -781.550274 | -781.414209                    | -781.403419 | -781.450743 |           |
| M06-2X/DG3/aug-cc-pVTZ |           | -781.557253 | -781.421333                    | -781.410509 | -781.457996 |           |
| MN15/cc-pVTZ           |           | -781.180939 | -781.045647                    | -781.034833 | -781.082122 |           |
| MN15/aug-cc-pVTZ       |           | -781.191812 | -781.056835                    | -781.045969 | -781.093473 |           |
| Coordinates (xyz)      |           |             | Vibrations (cm <sup>-1</sup> ) |             |             |           |
| C                      | 0.058222  | -0.014170   | 0.010338                       | 55.7041     | 982.4516    | 1487.6063 |
| C                      | 0.084249  | 0.034279    | 1.530280                       | 82.339      | 985.7615    | 1495.2754 |
| C                      | 1.496834  | -0.072576   | 2.095633                       | 96.0899     | 1003.5785   | 3032.8339 |
| S                      | 1.485595  | -0.272612   | 3.904958                       | 118.0314    | 1061.0853   | 3076.2067 |
| C                      | 1.724934  | -2.065689   | 4.021768                       | 163.8928    | 1083.8377   | 3088.9917 |
| H                      | 0.527713  | -0.92199    | -0.364263                      | 192.8784    | 1159.8759   | 3103.9415 |
| H                      | -0.354073 | 0.984354    | 1.856176                       | 240.0951    | 1214.887    | 3151.8708 |
| H                      | 2.065708  | 0.825263    | 1.863897                       | 292.3751    | 1246.9587   | 3161.053  |
| H                      | 2.020777  | -0.924284   | 1.661675                       | 387.5337    | 1267.3189   | 3170.7203 |
| H                      | 1.659918  | -2.325753   | 5.07539                        | 427.6798    | 1280.4352   | 3171.969  |
| H                      | 0.95771   | -2.600705   | 3.467662                       | 453.9982    | 1319.1143   | 3810.5267 |
| H                      | 2.709387  | -2.336854   | 3.647666                       | 483.5391    | 1355.9135   |           |
| O                      | -0.731986 | -1.045146   | 1.929872                       | 584.0206    | 1363.1984   |           |
| H                      | -0.764545 | -1.03238    | 2.893836                       | 727.8904    | 1405.9288   |           |
| H                      | -0.966941 | 0.062203    | -0.345198                      | 765.053     | 1430.7722   |           |
| O                      | 0.749035  | 1.1171      | -0.545255                      | 845.2893    | 1461.9675   |           |
| O                      | 2.019765  | 0.886076    | -0.692372                      | 897.7028    | 1473.9056   |           |

**A2\_Im2\_1**

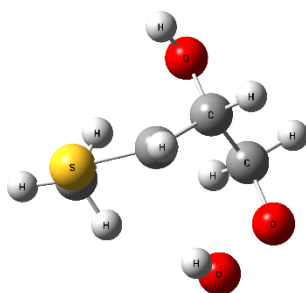

| <b>Method</b>            |          |           |          |         |          |           | <b>Ee</b>                           |           |           | <b>E+ZPE</b> |          |          | <b><math>\Delta H</math></b> |   |          | <b><math>\Delta G</math></b> |          |          |          |          |   |          |           |          |          |          |           |   |        |           |          |          |           |           |   |          |           |           |          |          |           |   |           |          |          |          |           |           |   |          |          |          |          |           |           |   |          |          |          |         |           |           |   |          |           |          |         |          |           |   |          |           |          |          |           |           |   |          |           |          |          |           |  |   |           |           |          |         |           |  |   |           |           |          |          |           |  |   |           |         |           |          |           |  |   |          |          |           |          |           |  |   |          |          |           |          |           |  |
|--------------------------|----------|-----------|----------|---------|----------|-----------|-------------------------------------|-----------|-----------|--------------|----------|----------|------------------------------|---|----------|------------------------------|----------|----------|----------|----------|---|----------|-----------|----------|----------|----------|-----------|---|--------|-----------|----------|----------|-----------|-----------|---|----------|-----------|-----------|----------|----------|-----------|---|-----------|----------|----------|----------|-----------|-----------|---|----------|----------|----------|----------|-----------|-----------|---|----------|----------|----------|---------|-----------|-----------|---|----------|-----------|----------|---------|----------|-----------|---|----------|-----------|----------|----------|-----------|-----------|---|----------|-----------|----------|----------|-----------|--|---|-----------|-----------|----------|---------|-----------|--|---|-----------|-----------|----------|----------|-----------|--|---|-----------|---------|-----------|----------|-----------|--|---|----------|----------|-----------|----------|-----------|--|---|----------|----------|-----------|----------|-----------|--|
| M06-2X/GD3/cc-pVTZ       |          |           |          |         |          |           | -781.535392                         |           |           | -781.400441  |          |          | -781.38944                   |   |          | -781.436105                  |          |          |          |          |   |          |           |          |          |          |           |   |        |           |          |          |           |           |   |          |           |           |          |          |           |   |           |          |          |          |           |           |   |          |          |          |          |           |           |   |          |          |          |         |           |           |   |          |           |          |         |          |           |   |          |           |          |          |           |           |   |          |           |          |          |           |  |   |           |           |          |         |           |  |   |           |           |          |          |           |  |   |           |         |           |          |           |  |   |          |          |           |          |           |  |   |          |          |           |          |           |  |
| M06-2X/DG3/aug-cc-pVTZ   |          |           |          |         |          |           | -781.542809                         |           |           | -781.40802   |          |          | -781.396984                  |   |          | -781.443745                  |          |          |          |          |   |          |           |          |          |          |           |   |        |           |          |          |           |           |   |          |           |           |          |          |           |   |           |          |          |          |           |           |   |          |          |          |          |           |           |   |          |          |          |         |           |           |   |          |           |          |         |          |           |   |          |           |          |          |           |           |   |          |           |          |          |           |  |   |           |           |          |         |           |  |   |           |           |          |          |           |  |   |           |         |           |          |           |  |   |          |          |           |          |           |  |   |          |          |           |          |           |  |
| MN15/cc-pVTZ             |          |           |          |         |          |           | -781.167522                         |           |           | -781.03337   |          |          | -781.022298                  |   |          | -781.069102                  |          |          |          |          |   |          |           |          |          |          |           |   |        |           |          |          |           |           |   |          |           |           |          |          |           |   |           |          |          |          |           |           |   |          |          |          |          |           |           |   |          |          |          |         |           |           |   |          |           |          |         |          |           |   |          |           |          |          |           |           |   |          |           |          |          |           |  |   |           |           |          |         |           |  |   |           |           |          |          |           |  |   |           |         |           |          |           |  |   |          |          |           |          |           |  |   |          |          |           |          |           |  |
| MN15/aug-cc-pVTZ         |          |           |          |         |          |           | -781.179164                         |           |           | -781.045268  |          |          | -781.034177                  |   |          | -781.081022                  |          |          |          |          |   |          |           |          |          |          |           |   |        |           |          |          |           |           |   |          |           |           |          |          |           |   |           |          |          |          |           |           |   |          |          |          |          |           |           |   |          |          |          |         |           |           |   |          |           |          |         |          |           |   |          |           |          |          |           |           |   |          |           |          |          |           |  |   |           |           |          |         |           |  |   |           |           |          |          |           |  |   |           |         |           |          |           |  |   |          |          |           |          |           |  |   |          |          |           |          |           |  |
| <b>Coordinates (xyz)</b> |          |           |          |         |          |           | <b>Vibrations (cm<sup>-1</sup>)</b> |           |           |              |          |          |                              |   |          |                              |          |          |          |          |   |          |           |          |          |          |           |   |        |           |          |          |           |           |   |          |           |           |          |          |           |   |           |          |          |          |           |           |   |          |          |          |          |           |           |   |          |          |          |         |           |           |   |          |           |          |         |          |           |   |          |           |          |          |           |           |   |          |           |          |          |           |  |   |           |           |          |         |           |  |   |           |           |          |          |           |  |   |           |         |           |          |           |  |   |          |          |           |          |           |  |   |          |          |           |          |           |  |
| C                        | 0.002069 | -0.007692 | 0.004280 | 75.1568 | 924.3261 | 1482.7258 | C                                   | -0.004094 | -0.000381 | 1.538488     | 105.6191 | 971.6148 | 1505.6841                    | C | 1.334289 | 0.000590                     | 2.208272 | 123.8129 | 977.1332 | 3034.848 | S | 2.386391 | -1.335607 | 2.420938 | 177.5259 | 993.0504 | 3083.1398 | C | 1.9778 | -2.476791 | 1.078332 | 207.5999 | 1044.2409 | 3092.8345 | H | 0.307346 | -0.976808 | -0.386188 | 229.2422 | 1074.212 | 3151.7232 | H | -0.496787 | 0.928596 | 1.844078 | 253.6865 | 1119.6085 | 3177.2274 | H | 1.583268 | 0.824558 | 2.862739 | 284.3944 | 1147.9823 | 3183.5962 | H | 2.491156 | 0.774926 | 0.267434 | 302.577 | 1253.8478 | 3205.6503 | H | 2.572703 | -3.367894 | 1.260405 | 365.681 | 1285.989 | 3759.2138 | H | 0.920449 | -2.723434 | 1.104044 | 402.5053 | 1323.4266 | 3869.4786 | H | 2.252555 | -2.037759 | 0.122932 | 410.3995 | 1351.7703 |  | O | -0.813204 | -1.120827 | 1.889454 | 487.677 | 1362.1479 |  | H | -0.829848 | -1.197413 | 2.847436 | 584.9147 | 1392.1401 |  | H | -1.008979 | 0.20616 | -0.343742 | 621.9711 | 1407.7772 |  | O | 0.808309 | 1.012672 | -0.540374 | 703.4089 | 1417.5892 |  | O | 2.146316 | 0.540549 | -0.606853 | 767.2993 | 1468.9594 |  |

## 4. MSP decomposition

| MSP                                                                               |             |           |             |                                |             |           |
|-----------------------------------------------------------------------------------|-------------|-----------|-------------|--------------------------------|-------------|-----------|
| 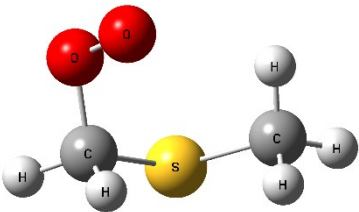 |             |           |             |                                |             |           |
| Method                                                                            | Ee          |           | E+ZPE       | $\Delta H$                     | $\Delta G$  |           |
| M06-2X/GD3/cc-pVTZ                                                                | -627.707413 |           | -627.63398  | -627.626686                    | -627.665201 |           |
| M06-2X/DG3/aug-cc-pVTZ                                                            | -627.712042 |           | -627.638631 | -627.631354                    | -627.669815 |           |
| MN15/cc-pVTZ                                                                      | -627.450945 |           | -627.377787 | -627.370478                    | -627.40904  |           |
| MN15/aug-cc-pVTZ                                                                  | -627.45831  |           | -627.385225 | -627.377927                    | -627.416446 |           |
| SVECV-f12                                                                         | -627.590561 |           | -627.517153 | -627.509872                    | -627.548362 |           |
| Coordinates (xyz)                                                                 |             |           |             | Vibrations (cm <sup>-1</sup> ) |             |           |
| C                                                                                 | -0.006460   | 0.003403  | 0.047089    | 82.7949                        | 981.1007    | 3103.6011 |
| S                                                                                 | -0.013252   | 0.294449  | 1.812126    | 114.0785                       | 1038.5244   | 3167.1805 |
| C                                                                                 | 1.731494    | -0.022063 | 2.167991    | 188.4199                       | 1226.5954   | 3174.7835 |
| H                                                                                 | -0.986736   | 0.273025  | -0.336809   | 256.6521                       | 1306.3094   | 3180.2447 |
| H                                                                                 | 0.787882    | 0.552441  | -0.453322   | 367.233                        | 1334.7441   |           |
| H                                                                                 | 1.872843    | 0.189001  | 3.224949    | 538.2842                       | 1362.8132   |           |
| H                                                                                 | 1.981436    | -1.060391 | 1.967425    | 717.6909                       | 1445.8275   |           |
| H                                                                                 | 2.365550    | 0.635107  | 1.577498    | 766.0617                       | 1469.9585   |           |
| O                                                                                 | 1.426988    | -1.684666 | -0.439986   | 892.6159                       | 1484.3777   |           |
| O                                                                                 | 0.172285    | -1.391153 | -0.273178   | 945.4856                       | 3078.2171   |           |

**MSO**

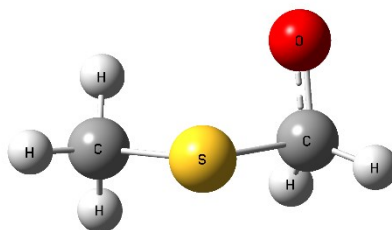

| Method                 |           | Ee          | E+ZPE       | $\Delta H$                     | $\Delta G$  |           |
|------------------------|-----------|-------------|-------------|--------------------------------|-------------|-----------|
| M06-2X/GD3/cc-pVTZ     |           | -552.544637 | -552.476321 | -552.469815                    | -552.505714 |           |
| M06-2X/DG3/aug-cc-pVTZ |           | -552.548542 | -552.480285 | -552.473757                    | -552.509745 |           |
| MN15/cc-pVTZ           |           | -552.33308  | -552.264768 | -552.258337                    | -552.294049 |           |
| MN15/aug-cc-pVTZ       |           | -552.339634 | -552.27144  | -552.264985                    | -552.300804 |           |
| SVECV-f12              |           | -552.437202 | -552.368945 | -552.362417                    | -552.398405 |           |
| Coordinates (xyz)      |           |             |             | Vibrations (cm <sup>-1</sup> ) |             |           |
| C                      | 0.004601  | -0.041188   | -0.077552   | 102.6913                       | 1111.8586   | 3081.9634 |
| S                      | 0.002272  | -0.059553   | 1.769052    | 157.0228                       | 1203.2504   | 3169.8311 |
| C                      | 1.784486  | 0.025295    | 2.051502    | 239.65                         | 1263.6919   | 3183.7282 |
| H                      | -1.015300 | 0.215018    | -0.379699   | 303.3571                       | 1346.9111   |           |
| H                      | 0.729707  | 0.709129    | -0.408660   | 582.3724                       | 1469.7157   |           |
| H                      | 1.936212  | -0.058486   | 3.124715    | 733.0835                       | 1485.7234   |           |
| H                      | 2.272654  | -0.805773   | 1.552040    | 918.1339                       | 1518.0351   |           |
| H                      | 2.180607  | 0.974546    | 1.699225    | 968.8336                       | 3017.7661   |           |
| O                      | 0.364574  | -1.316496   | -0.275672   | 1023.6712                      | 3080.1418   |           |

**MeS**

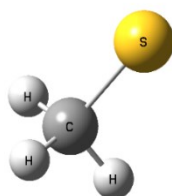

| <b>Method</b>            |           |           |           |                                     | <b>Ee</b>   | <b>E+ZPE</b> | <b>ΔH</b>   | <b>ΔG</b>   |
|--------------------------|-----------|-----------|-----------|-------------------------------------|-------------|--------------|-------------|-------------|
| M06-2X/GD3/cc-pVTZ       |           |           |           |                                     | -438.046809 | -438.012842  | -438.008887 | -438.037052 |
| M06-2X/DG3/aug-cc-pVTZ   |           |           |           |                                     | -438.048284 | -438.012934  | -438.008657 | -438.037291 |
| MN15/cc-pVTZ             |           |           |           |                                     | -437.912357 | -437.876652  | -437.872519 | -437.900902 |
| MN15/aug-cc-pVTZ         |           |           |           |                                     | -437.91537  | -437.879712  | -437.87558  | -437.903959 |
| SVECV-f12                |           |           |           |                                     | -437.949675 | -437.914325  | -437.910048 | -437.938683 |
| <b>Coordinates (xyz)</b> |           |           |           | <b>Vibrations (cm<sup>-1</sup>)</b> |             |              |             |             |
| S                        | -0.689551 | 0.019268  | 0.045929  | 391.1284                            | 1477.5619   |              |             |             |
| C                        | 1.101820  | -0.011108 | -0.018060 | 737.3702                            | 3054.1732   |              |             |             |
| H                        | 1.529315  | 0.907615  | 0.375059  | 868.4326                            | 3129.3659   |              |             |             |
| H                        | 1.504331  | -0.879678 | 0.496533  | 1335.1263                           | 3145.7596   |              |             |             |
| H                        | 1.370421  | -0.086199 | -1.074490 | 1377.8804                           |             |              |             |             |

**MeS-O2**

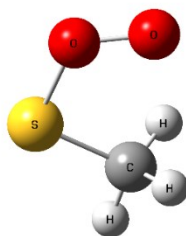

| Method                 | Ee          | E+ZPE       | $\Delta H$                     | $\Delta G$  |           |           |
|------------------------|-------------|-------------|--------------------------------|-------------|-----------|-----------|
| M06-2X/GD3/cc-pVTZ     | -588.383406 | -588.339586 | -588.333331                    | -588.369333 |           |           |
| M06-2X/DG3/aug-cc-pVTZ | -588.388035 | -588.344196 | -588.33797                     | -588.373819 |           |           |
| MN15/cc-pVTZ           | -588.159994 | -588.116288 | -588.110062                    | -588.145795 |           |           |
| MN15/aug-cc-pVTZ       | -588.166847 | -588.123178 | -588.116972                    | -588.152636 |           |           |
| SVECV-f12              | -588.270455 | -588.226615 | -588.220389                    | -588.256238 |           |           |
| Coordinates (xyz)      |             |             | Vibrations (cm <sup>-1</sup> ) |             |           |           |
| S                      | 0.055018    | -0.071107   | -0.018460                      | 46.6159     | 976.301   | 3185.7322 |
| C                      | -0.064094   | 0.058235    | 1.756647                       | 210.5086    | 1249.6989 |           |
| H                      | 0.947991    | -0.153893   | 2.102273                       | 278.2735    | 1342.4521 |           |
| H                      | -0.355808   | 1.060715    | 2.054870                       | 463.8794    | 1442.7693 |           |
| H                      | -0.754733   | -0.678836   | 2.155071                       | 623.7602    | 1476.1118 |           |
| O                      | -2.393982   | 0.523071    | 0.506701                       | 735.9773    | 3076.5429 |           |
| O                      | -1.582718   | 0.279435    | -0.458731                      | 970.571     | 3164.1115 |           |

**MSP\_1**

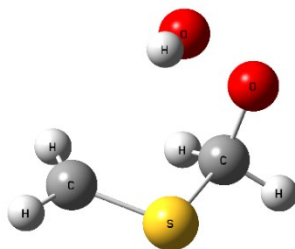

| Method                 | Ee          | E+ZPE       | $\Delta H$  | $\Delta G$                     |           |           |
|------------------------|-------------|-------------|-------------|--------------------------------|-----------|-----------|
| M06-2X/GD3/cc-pVTZ     | -627.690988 | -627.619578 | -627.611829 | -627.650786                    |           |           |
| M06-2X/DG3/aug-cc-pVTZ | -627.696043 | -627.624655 | -627.616915 | -627.655872                    |           |           |
| MN15/cc-pVTZ           | -627.436723 | -627.365551 | -627.357769 | -627.396802                    |           |           |
| MN15/aug-cc-pVTZ       | -627.444711 | -627.373589 | -627.365822 | -627.404809                    |           |           |
| SVECV-f12              | -627.576769 | -627.505381 | -627.497641 | -627.536599                    |           |           |
| Coordinates (xyz)      |             |             |             | Vibrations (cm <sup>-1</sup> ) |           |           |
| C                      | 0.111924    | -0.014533   | 0.113593    | 74.5438                        | 888.293   | 3165.0742 |
| S                      | -0.019967   | -0.237008   | 1.912817    | 164.2856                       | 954.7031  | 3180.1065 |
| C                      | 1.577982    | 0.123867    | 2.420415    | 206.9358                       | 1026.7125 | 3307.6361 |
| H                      | -0.897393   | 0.153902    | -0.255603   | 291.8835                       | 1111.7113 | 3767.4223 |
| H                      | 0.750000    | 0.845856    | -0.088103   | 336.0382                       | 1292.7241 |           |
| H                      | 1.774696    | 0.072548    | 3.478400    | 380.7256                       | 1325.3597 |           |
| H                      | 2.259542    | 0.627029    | 1.753271    | 419.3092                       | 1405.76   |           |
| O                      | 0.568637    | -1.144230   | -0.572519   | 516.0658                       | 1422.3362 |           |
| O                      | 1.955798    | -1.281341   | -0.321186   | 721.4112                       | 1447.5049 |           |
| H                      | 1.969125    | -1.775208   | 0.512248    | 843                            | 3086.1774 |           |

**MSP\_2**

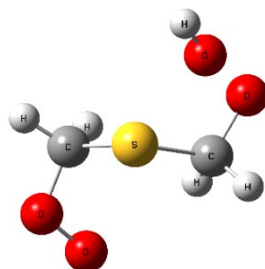

| Method                 |           | Ee          | E+ZPE       | $\Delta H$                     | $\Delta G$  |           |
|------------------------|-----------|-------------|-------------|--------------------------------|-------------|-----------|
| M06-2X/GD3/cc-pVTZ     |           | -778.06207  | -777.979207 | -777.970026                    | -778.013782 |           |
| M06-2X/DG3/aug-cc-pVTZ |           | -778.069772 | -777.987153 | -777.977882                    | -778.021906 |           |
| MN15/cc-pVTZ           |           | -777.716998 | -777.634546 | -777.62536                     | -777.668925 |           |
| MN15/aug-cc-pVTZ       |           | -777.72786  | -777.645621 | -777.636389                    | -777.680114 |           |
| Coordinates (xyz)      |           |             |             | Vibrations (cm <sup>-1</sup> ) |             |           |
| C                      | 0.032905  | -0.167892   | -0.116868   | 51.3786                        | 887.6462    | 1465.782  |
| S                      | -0.037723 | -0.057382   | 1.700420    | 81.2733                        | 930.1649    | 3103.784  |
| C                      | 1.691428  | 0.228599    | 2.090102    | 120.4403                       | 967.7801    | 3112.4698 |
| H                      | -0.873469 | 0.286382    | -0.510870   | 149.5702                       | 1027.6835   | 3172.6324 |
| H                      | 0.913399  | 0.370018    | -0.462848   | 241.3453                       | 1107.0463   | 3187.7678 |
| H                      | 1.883350  | -0.134865   | 3.095681    | 294.4414                       | 1233.644    | 3798.2538 |
| O                      | 0.007825  | -1.481920   | -0.598638   | 318.6051                       | 1280.1671   |           |
| O                      | 1.228815  | -2.101538   | -0.229647   | 363.3503                       | 1287.8852   |           |
| H                      | 0.958615  | -2.614293   | 0.544224    | 512.7354                       | 1325.9448   |           |
| H                      | 2.333837  | -0.257320   | 1.359960    | 550.2797                       | 1352.2983   |           |
| O                      | 2.043454  | 1.626235    | 2.140546    | 728.9115                       | 1412.8812   |           |
| O                      | 2.057208  | 2.157608    | 0.957772    | 747.7096                       | 1451.5098   |           |



**P-Im1a**

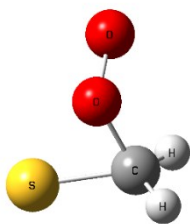

| Method                 |           | Ee          | E+ZPE       | $\Delta H$                     | $\Delta G$  |
|------------------------|-----------|-------------|-------------|--------------------------------|-------------|
| M06-2X/GD3/cc-pVTZ     |           | -587.714161 | -587.67986  | -587.674756                    | -587.706925 |
| M06-2X/DG3/aug-cc-pVTZ |           | -587.719672 | -587.685589 | -587.680433                    | -587.712712 |
| MN15/cc-pVTZ           |           | -587.496779 | -587.462381 | -587.457255                    | -587.489488 |
| MN15/aug-cc-pVTZ       |           | -587.503677 | -587.46936  | -587.464216                    | -587.496486 |
| SVECV-f12              |           | -588.254721 | -588.220638 | -588.215482                    | -588.247761 |
| Coordinates (xyz)      |           |             |             | Vibrations (cm <sup>-1</sup> ) |             |
| S                      | 0.013924  | 0.015161    | -0.012749   | 189.3155                       | 1010.8314   |
| C                      | -0.001527 | -0.000468   | 1.759197    | 405.7408                       | 1173.4439   |
| H                      | 0.959471  | 0.002716    | 2.259262    | 499.3085                       | 1225.4342   |
| H                      | -0.830783 | 0.474289    | 2.266574    | 719.9511                       | 1471.917    |
| O                      | -0.364340 | -1.327213   | 1.355301    | 934.8262                       | 3139.2266   |
| O                      | -1.624207 | -1.643748   | 1.611225    | 942.0582                       | 3248.721    |

**P-Im1b**

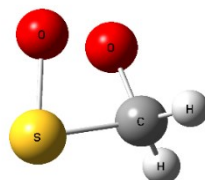

| Method                 |           | Ee          | E+ZPE       | $\Delta H$                     | $\Delta G$  |
|------------------------|-----------|-------------|-------------|--------------------------------|-------------|
| M06-2X/GD3/cc-pVTZ     |           | -587.714161 | -587.67986  | -587.674756                    | -587.706925 |
| M06-2X/DG3/aug-cc-pVTZ |           | -587.719672 | -587.685589 | -587.680433                    | -587.712712 |
| MN15/cc-pVTZ           |           | -587.496779 | -587.462381 | -587.457255                    | -587.489488 |
| MN15/aug-cc-pVTZ       |           | -587.503677 | -587.46936  | -587.464216                    | -587.496486 |
| SVECV-f12              |           | -588.307089 | -588.271493 | -588.266703                    | -588.298186 |
| Coordinates (xyz)      |           |             |             | Vibrations (cm <sup>-1</sup> ) |             |
| S                      | 0.013924  | 0.015161    | -0.012749   | 189.3155                       | 1010.8314   |
| C                      | -0.001527 | -0.000468   | 1.759197    | 405.7408                       | 1173.4439   |
| H                      | 0.959471  | 0.002716    | 2.259262    | 499.3085                       | 1225.4342   |
| H                      | -0.830783 | 0.474289    | 2.266574    | 719.9511                       | 1471.917    |
| O                      | -0.364340 | -1.327213   | 1.355301    | 934.8262                       | 3139.2266   |
| O                      | -1.624207 | -1.643748   | 1.611225    | 942.0582                       | 3248.721    |

**P-Im2**

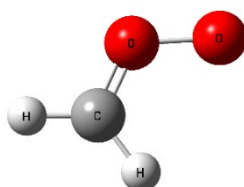

| <b>Method</b>            |           |           |           |                                     | <b>Ee</b>   | <b>E+ZPE</b> | <b><math>\Delta H</math></b> | <b><math>\Delta G</math></b> |
|--------------------------|-----------|-----------|-----------|-------------------------------------|-------------|--------------|------------------------------|------------------------------|
| M06-2X/GD3/cc-pVTZ       |           |           |           |                                     | -189.570184 | -189.538406  | -189.534217                  | -189.562444                  |
| M06-2X/DG3/aug-cc-pVTZ   |           |           |           |                                     | -189.57547  | -189.543684  | -189.539493                  | -189.567728                  |
| MN15/cc-pVTZ             |           |           |           |                                     | -189.450699 | -189.419141  | -189.414924                  | -189.443194                  |
| MN15/aug-cc-pVTZ         |           |           |           |                                     | -189.456507 | -189.424976  | -189.420758                  | -189.449035                  |
| SVECV-f12                |           |           |           |                                     | -189.777862 | -189.746076  | -189.741885                  | -189.77012                   |
| <b>Coordinates (xyz)</b> |           |           |           | <b>Vibrations (cm<sup>-1</sup>)</b> |             |              |                              |                              |
| C                        | 0.002171  | 0.003752  | 0.001295  | 538.8687                            | 1434.5589   |              |                              |                              |
| H                        | -0.003865 | 0.002602  | 1.082487  | 699.6491                            | 1630.2589   |              |                              |                              |
| H                        | 0.888508  | -0.003339 | -0.622944 | 929.327                             | 3141.3197   |              |                              |                              |
| O                        | -1.109927 | 0.014179  | -0.544771 | 1024.2081                           | 3292.0899   |              |                              |                              |
| O                        | -1.168475 | 0.016208  | -1.886825 | 1262.2725                           |             |              |                              |                              |

**P-Im3**

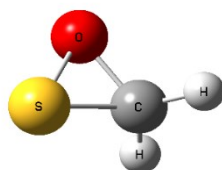

| <b>Method</b>            |           |           |           |                                     | <b>Ee</b>   | <b>E+ZPE</b> | <b>ΔH</b>   | <b>ΔG</b>   |
|--------------------------|-----------|-----------|-----------|-------------------------------------|-------------|--------------|-------------|-------------|
| M06-2X/GD3/cc-pVTZ       |           |           |           |                                     | -512.653516 | -512.622247  | -512.618146 | -512.6473   |
| M06-2X/DG3/aug-cc-pVTZ   |           |           |           |                                     | -512.656913 | -512.625665  | -512.621562 | -512.650717 |
| MN15/cc-pVTZ             |           |           |           |                                     | -512.47346  | -512.442285  | -512.438178 | -512.467328 |
| MN15/aug-cc-pVTZ         |           |           |           |                                     | -512.478941 | -512.447775  | -512.443669 | -512.472817 |
| SVECV-f12                |           |           |           |                                     | -513.11389  | -513.082643  | -513.07854  | -513.107695 |
| <b>Coordinates (xyz)</b> |           |           |           | <b>Vibrations (cm<sup>-1</sup>)</b> |             |              |             |             |
| C                        | 0.003538  | 0.000873  | 0.009718  | 679.2236                            | 1196.3841   |              |             |             |
| S                        | -0.004658 | -0.000703 | 1.779845  | 762.8491                            | 1510.8389   |              |             |             |
| H                        | 0.974562  | -0.004291 | -0.470636 | 912.3574                            | 3128.3703   |              |             |             |
| H                        | -0.797324 | -0.541345 | -0.478400 | 1144.8072                           | 3231.5297   |              |             |             |
| O                        | -0.362693 | 1.201979  | 0.602059  | 1149.8063                           |             |              |             |             |

**MSP\_3**

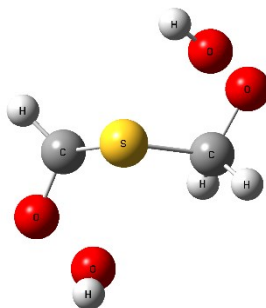

| Method                 | Ee          | E+ZPE       | $\Delta H$                     | $\Delta G$  |           |           |
|------------------------|-------------|-------------|--------------------------------|-------------|-----------|-----------|
| M06-2X/GD3/cc-pVTZ     | -778.04673  | -777.965967 | -777.95602                     | -778.001295 |           |           |
| M06-2X/DG3/aug-cc-pVTZ | -778.054706 | -777.974054 | -777.964057                    | -778.009469 |           |           |
| MN15/cc-pVTZ           | -777.703775 | -777.623674 | -777.613584                    | -777.659064 |           |           |
| MN15/aug-cc-pVTZ       | -777.714792 | -777.634942 | -777.62478                     | -777.670554 |           |           |
| Coordinates (xyz)      |             |             | Vibrations (cm <sup>-1</sup> ) |             |           |           |
| C                      | 0.178160    | -0.257344   | -0.264354                      | 44.1817     | 703.0836  | 1452.9249 |
| S                      | 0.134920    | 0.196631    | 1.417601                       | 76.8175     | 803.1386  | 3103.4971 |
| C                      | 1.890204    | -0.037610   | 1.917583                       | 133.5252    | 927.701   | 3178.9855 |
| H                      | -0.214797   | 0.416704    | -1.012260                      | 146.2654    | 973.0123  | 3218.1587 |
| H                      | 2.013245    | 2.166147    | 0.523191                       | 184.5527    | 1004.7228 | 3779.5881 |
| H                      | 1.887908    | -0.425580   | 2.934198                       | 254.333     | 1116.9842 | 3798.7309 |
| O                      | -0.007315   | -1.537946   | -0.667501                      | 294.4993    | 1159.1261 |           |
| O                      | 0.776390    | -2.431111   | 0.114491                       | 319.7678    | 1291.7143 |           |
| H                      | 0.123392    | -2.755609   | 0.750018                       | 365.3574    | 1313.8524 |           |
| H                      | 2.346719    | -0.735953   | 1.220219                       | 461.7816    | 1342.8787 |           |
| O                      | 2.598606    | 1.161682    | 1.991252                       | 518.1929    | 1418.8235 |           |
| O                      | 2.805645    | 1.630363    | 0.671532                       | 594.0617    | 1421.9128 |           |

**P-Im4**

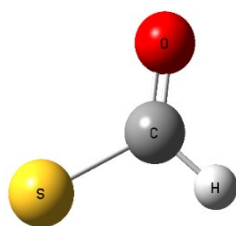

| <b>Method</b>            |           |          |           |                                     | <b>Ee</b>   | <b>E+ZPE</b> | <b><math>\Delta H</math></b> | <b><math>\Delta G</math></b> |
|--------------------------|-----------|----------|-----------|-------------------------------------|-------------|--------------|------------------------------|------------------------------|
| M06-2X/GD3/cc-pVTZ       |           |          |           |                                     | -512.063348 | -512.044925  | -512.040593                  | -512.07079                   |
| M06-2X/DG3/aug-cc-pVTZ   |           |          |           |                                     | -512.066588 | -512.048151  | -512.043831                  | -512.074004                  |
| MN15/cc-pVTZ             |           |          |           |                                     | -511.883843 | -511.865574  | -511.861205                  | -511.891473                  |
| MN15/aug-cc-pVTZ         |           |          |           |                                     | -511.888711 | -511.870459  | -511.866092                  | -511.896357                  |
| SVECV-f12                |           |          |           |                                     | -512.528179 | -512.509742  | -512.505422                  | -512.535595                  |
| <b>Coordinates (xyz)</b> |           |          |           | <b>Vibrations (cm<sup>-1</sup>)</b> |             |              |                              |                              |
| C                        | -0.054337 | 0.000000 | -0.112590 | 342.7914                            | 1791.1023   |              |                              |                              |
| S                        | 0.016073  | 0.000000 | 1.647978  | 687.7133                            | 2971.4708   |              |                              |                              |
| H                        | 0.952412  | 0.000000 | -0.565132 | 944.5961                            |             |              |                              |                              |
| O                        | -1.066466 | 0.000000 | -0.746409 | 1355.1824                           |             |              |                              |                              |

**MSP\_3a**

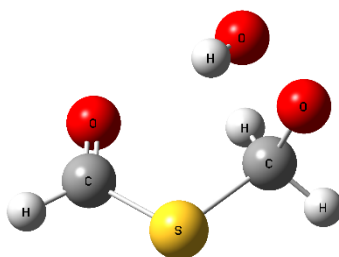

| Method                 |           | Ee          | E+ZPE                          | $\Delta H$  | $\Delta G$  |           |
|------------------------|-----------|-------------|--------------------------------|-------------|-------------|-----------|
| M06-2X/GD3/cc-pVTZ     |           | -702.372949 | -702.305648                    | -702.297636 | -702.337515 |           |
| M06-2X/DG3/aug-cc-pVTZ |           | -702.379135 | -702.311909                    | -702.303898 | -702.343752 |           |
| MN15/cc-pVTZ           |           | -702.072243 | -702.005212                    | -701.997216 | -702.036907 |           |
| MN15/aug-cc-pVTZ       |           | -702.081273 | -702.014391                    | -702.006372 | -702.046131 |           |
| SVECV-f12              |           | -702.245511 | -702.178285                    | -702.170274 | -702.210128 |           |
| Coordinates (xyz)      |           |             | Vibrations (cm <sup>-1</sup> ) |             |             |           |
| C                      | -0.010563 | -0.032539   | -0.011391                      | 60.9612     | 921.2026    | 3007.548  |
| S                      | -0.001495 | 0.041207    | 1.765975                       | 129.2401    | 957.3743    | 3102.6277 |
| C                      | 1.794453  | 0.012698    | 2.085619                       | 205.914     | 1011.0878   | 3177.7967 |
| H                      | -1.041068 | 0.019908    | -0.394865                      | 216.0932    | 1120.3068   | 3796.0466 |
| H                      | 1.453594  | 2.617997    | 1.571957                       | 250.1938    | 1295.4577   |           |
| H                      | 1.979822  | -0.684720   | 2.898243                       | 359.0488    | 1325.9905   |           |
| O                      | 0.945114  | -0.139849   | -0.717280                      | 510.3977    | 1379.1956   |           |
| H                      | 2.281822  | -0.299655   | 1.163257                       | 525.5226    | 1417.1545   |           |
| O                      | 2.280046  | 1.241106    | 2.538019                       | 717.5254    | 1452.1644   |           |
| O                      | 2.284066  | 2.139710    | 1.443326                       | 752.3057    | 1817.8341   |           |

**MSP\_3b**

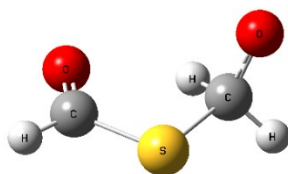

| Method                 |           |           |           | Ee                             | E+ZPE       | $\Delta H$  | $\Delta G$  |
|------------------------|-----------|-----------|-----------|--------------------------------|-------------|-------------|-------------|
| M06-2X/GD3/cc-pVTZ     |           |           |           | -626.564044                    | -626.514965 | -626.508297 | -626.546149 |
| M06-2X/DG3/aug-cc-pVTZ |           |           |           | -626.568958                    | -626.520073 | -626.513374 | -626.551213 |
| MN15/cc-pVTZ           |           |           |           | -626.307663                    | -626.258677 | -626.252098 | -626.289171 |
| MN15/aug-cc-pVTZ       |           |           |           | -626.315196                    | -626.266322 | -626.259725 | -626.296869 |
| Coordinates (xyz)      |           |           |           | Vibrations (cm <sup>-1</sup> ) |             |             |             |
| C                      | -0.093482 | -0.089313 | 0.059234  | 29.5348                        | 954.4281    | 3018.6005   |             |
| S                      | 0.053326  | 0.619378  | 1.676231  | 211.8002                       | 1097.6731   | 3055.7683   |             |
| C                      | 1.752956  | 0.052510  | 2.073830  | 246.9573                       | 1113.7968   |             |             |
| H                      | -1.063292 | 0.156842  | -0.397293 | 388.7837                       | 1251.9976   |             |             |
| H                      | 1.761589  | -0.320254 | 3.102919  | 518.391                        | 1357.2935   |             |             |
| O                      | 0.733220  | -0.760342 | -0.485754 | 618.8929                       | 1377.533    |             |             |
| H                      | 1.950292  | -0.800284 | 1.401970  | 698.3722                       | 1801.8644   |             |             |
| O                      | 2.726839  | 0.953031  | 1.859080  | 760.9455                       | 2955.3337   |             |             |



**P-Im5a**

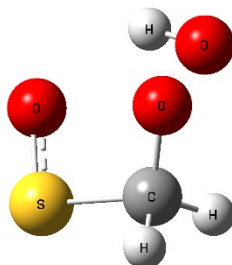

| Method                 | Ee          | E+ZPE       | $\Delta H$                     | $\Delta G$  |           |           |
|------------------------|-------------|-------------|--------------------------------|-------------|-----------|-----------|
| M06-2X/GD3/cc-pVTZ     | -663.625253 | -663.574697 | -663.568059                    | -663.605174 |           |           |
| M06-2X/DG3/aug-cc-pVTZ | -663.632265 | -663.581859 | -663.575189                    | -663.612372 |           |           |
| MN15/cc-pVTZ           | -663.355977 | -663.305702 | -663.299064                    | -663.336047 |           |           |
| MN15/aug-cc-pVTZ       | -663.365558 | -663.315403 | -663.308753                    | -663.345724 |           |           |
| SVECV-f12              | -664.236001 | -664.185596 | -664.178926                    | -664.216109 |           |           |
| Coordinates (xyz)      |             |             | Vibrations (cm <sup>-1</sup> ) |             |           |           |
| C                      | -0.001482   | 0.003149    | 0.006387                       | 61.2032     | 974.8488  | 3143.9258 |
| S                      | 0.011085    | 0.003705    | 1.852309                       | 196.2984    | 1090.0406 | 3716.9222 |
| H                      | 1.039862    | -0.012893   | -0.316389                      | 264.6977    | 1140.1742 |           |
| H                      | -0.535527   | -0.879825   | -0.345495                      | 398.4231    | 1268.378  |           |
| O                      | -0.581711   | 1.167767    | -0.478579                      | 496.2636    | 1305.1817 |           |
| O                      | -1.991679   | 0.990768    | -0.480240                      | 534.9375    | 1442.0163 |           |
| H                      | -2.206872   | 1.156855    | 0.452551                       | 650.1647    | 1466.5549 |           |
| O                      | -1.320160   | 0.612172    | 2.217338                       | 902.1617    | 3073.2963 |           |

**P-Im5b**

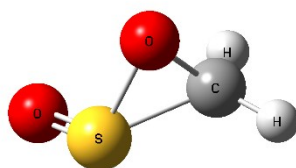

| Method                 |           | Ee          | E+ZPE       | $\Delta H$                     | $\Delta G$  |
|------------------------|-----------|-------------|-------------|--------------------------------|-------------|
| M06-2X/GD3/cc-pVTZ     |           | -587.873353 | -587.838017 | -587.833194                    | -587.864547 |
| M06-2X/DG3/aug-cc-pVTZ |           | -587.879231 | -587.843957 | -587.839127                    | -587.870493 |
| MN15/cc-pVTZ           |           | -587.650283 | -587.614974 | -587.610147                    | -587.641496 |
| MN15/aug-cc-pVTZ       |           | -587.658351 | -587.623081 | -587.618252                    | -587.649605 |
| SVECV-f12              |           | -588.415849 | -588.380575 | -588.375745                    | -588.407111 |
| Coordinates (xyz)      |           |             |             | Vibrations (cm <sup>-1</sup> ) |             |
| C                      | 0.090414  | -0.107221   | -0.048333   | 358.3521                       | 1139.518    |
| S                      | -0.143285 | 0.644808    | 1.540317    | 398.7369                       | 1153.6842   |
| H                      | 1.085374  | -0.235818   | -0.456410   | 651.7173                       | 1239.4589   |
| H                      | -0.658329 | -0.854019   | -0.285301   | 690.3225                       | 1485.2531   |
| O                      | -0.388234 | 1.227904    | -0.007829   | 899.1318                       | 3125.9071   |
| O                      | -1.386652 | 0.200347    | 2.163174    | 1104.2341                      | 3237.2798   |

D. Transitions States (TS) and Postreaction Wells (PW).

1. Addition of OH at C1 and C2.

| TS1-0_PRC-->A1         |             |           |           |                                |             |             |
|------------------------|-------------|-----------|-----------|--------------------------------|-------------|-------------|
|                        |             |           |           |                                |             |             |
| Method                 | Ee          |           |           | E+ZPE                          | $\Delta H$  | $\Delta G$  |
| M06-2X/GD3/cc-pVTZ     | -631.120548 |           |           | -630.998125                    | -630.988927 | -631.031607 |
| M06-2X/DG3/aug-cc-pVTZ | -631.125475 |           |           | -631.003261                    | -630.993976 | -631.037044 |
| MN15/cc-pVTZ           | -630.844336 |           |           | -630.722517                    | -630.713267 | -630.755963 |
| MN15/aug-cc-pVTZ       | -630.852689 |           |           | -630.731241                    | -630.721897 | -630.764938 |
| SVECV-f12              | -631.013807 |           |           | -630.8915928                   | -630.882308 | -630.925376 |
| Coordinates (xyz)      |             |           |           | Vibrations (cm <sup>-1</sup> ) |             |             |
| C                      | -0.008006   | 0.063288  | -0.009739 | <b>437.3872i</b>               | 951.0969    | 3068.1432   |
| C                      | -0.006343   | -0.05208  | 1.330755  | 60.9597                        | 979.8318    | 3081.4933   |
| C                      | 1.230379    | -0.051659 | 2.162033  | 100.1155                       | 983.401     | 3137.3804   |
| S                      | 1.902332    | -1.7287   | 2.469849  | 144.166                        | 991.3619    | 3152.5363   |
| C                      | 0.44224     | -2.513766 | 3.192334  | 170.4438                       | 1003.4141   | 3169.811    |
| H                      | 0.904306    | 0.277605  | -0.550686 | 205.8889                       | 1108.2694   | 3178.7634   |
| H                      | -0.930472   | 0.107577  | -0.566709 | 261.2082                       | 1235.4482   | 3189.4186   |
| H                      | -0.945309   | -0.224548 | 1.842907  | 364.7342                       | 1253.7794   | 3277.2074   |
| H                      | 1.054724    | 0.419747  | 3.128402  | 411.5482                       | 1315.6363   | 3720.5355   |
| H                      | 2.039341    | 0.476581  | 1.659838  | 435.1902                       | 1355.8423   |             |
| H                      | 0.74848     | -3.505316 | 3.515701  | 645.9031                       | 1442.6332   |             |
| H                      | 0.095388    | -1.950509 | 4.056912  | 736.1198                       | 1472.1147   |             |
| H                      | -0.350286   | -2.606145 | 2.452583  | 770.0242                       | 1478.5002   |             |
| O                      | 0.022599    | -2.041416 | -0.342273 | 806.8137                       | 1493.8323   |             |
| H                      | 0.811344    | -2.224081 | 0.197036  | 860.6312                       | 1631.8542   |             |

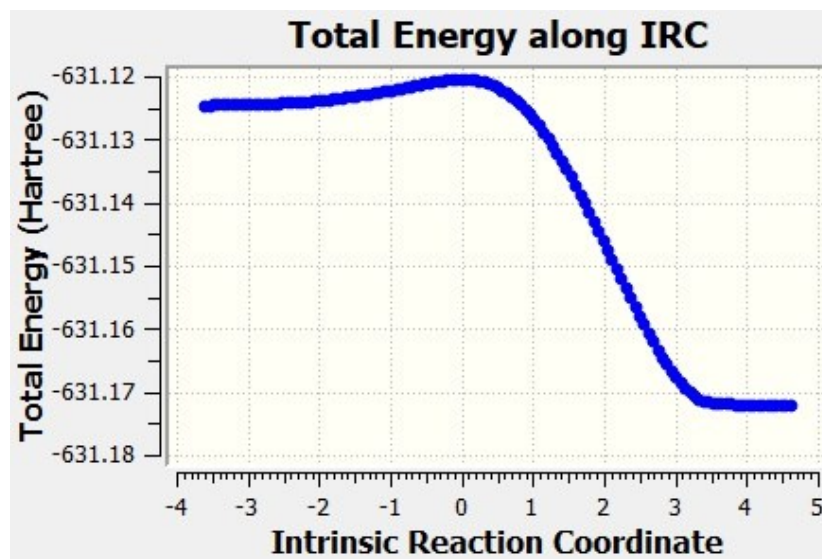

| Rx Coord | Energy      | Rx Coord | Energy            | Rx Coord | Energy      |
|----------|-------------|----------|-------------------|----------|-------------|
| -3.59552 | -631.124659 | -0.83469 | -631.1219625      | 1.92623  | -631.144597 |
| -3.53132 | -631.12465  | -0.77049 | -631.1218158      | 1.99044  | -631.146099 |
| -3.46713 | -631.12464  | -0.70628 | -631.1216688      | 2.05465  | -631.14761  |
| -3.40293 | -631.124629 | -0.64207 | -631.1215227      | 2.11886  | -631.149125 |
| -3.33873 | -631.124618 | -0.57786 | -631.1213792      | 2.18307  | -631.150641 |
| -3.27453 | -631.124606 | -0.51365 | -631.1212397      | 2.24727  | -631.15215  |
| -3.21033 | -631.124593 | -0.44944 | -631.1211059      | 2.31148  | -631.15365  |
| -3.14614 | -631.124579 | -0.38524 | -631.1209796      | 2.37569  | -631.155133 |
| -3.08194 | -631.124564 | -0.32103 | -631.1208635      | 2.4399   | -631.156595 |
| -3.01774 | -631.124547 | -0.25682 | -631.1207603      | 2.50411  | -631.15803  |
| -2.95355 | -631.124529 | -0.19262 | -631.1206734      | 2.56832  | -631.159432 |
| -2.88935 | -631.12451  | -0.12842 | -631.1206065      | 2.63253  | -631.160795 |
| -2.82515 | -631.124488 | -0.06422 | -631.1205635      | 2.69674  | -631.162113 |
| -2.76095 | -631.124463 | <b>0</b> | <b>-631.12055</b> | 2.76095  | -631.163379 |
| -2.69674 | -631.124436 | 0.06422  | -631.1205647      | 2.82516  | -631.164587 |
| -2.63254 | -631.124406 | 0.12842  | -631.1206164      | 2.88937  | -631.165729 |
| -2.56833 | -631.124373 | 0.19262  | -631.1207072      | 2.95358  | -631.166798 |
| -2.50413 | -631.124338 | 0.25682  | -631.1208409      | 3.01779  | -631.167786 |
| -2.43992 | -631.124299 | 0.32103  | -631.1210218      | 3.082    | -631.168685 |
| -2.37571 | -631.124256 | 0.38523  | -631.1212538      | 3.14621  | -631.169487 |
| -2.31151 | -631.124211 | 0.44944  | -631.121541       | 3.21042  | -631.170182 |
| -2.2473  | -631.124162 | 0.51365  | -631.1218867      | 3.27463  | -631.170762 |
| -2.18309 | -631.124109 | 0.57785  | -631.1222939      | 3.33882  | -631.171218 |
| -2.11888 | -631.124053 | 0.64206  | -631.1227648      | 3.40297  | -631.171544 |
| -2.05467 | -631.123994 | 0.70627  | -631.1233014      | 3.46674  | -631.17174  |
| -1.99046 | -631.12393  | 0.77048  | -631.1239047      | 3.52876  | -631.171839 |

|          |             |         |              |         |             |
|----------|-------------|---------|--------------|---------|-------------|
| -1.92625 | -631.123862 | 0.83468 | -631.1245753 | 3.59249 | -631.171901 |
| -1.86204 | -631.123789 | 0.89889 | -631.1253131 | 3.65647 | -631.17195  |
| -1.79784 | -631.123711 | 0.9631  | -631.1261176 | 3.72043 | -631.17199  |
| -1.73363 | -631.123628 | 1.02731 | -631.1269876 | 3.78447 | -631.172025 |
| -1.66942 | -631.12354  | 1.09152 | -631.1279215 | 3.84859 | -631.172055 |
| -1.60521 | -631.123446 | 1.15572 | -631.1289175 | 3.91276 | -631.172083 |
| -1.541   | -631.123348 | 1.21993 | -631.1299731 | 3.97696 | -631.172109 |
| -1.47679 | -631.123244 | 1.28414 | -631.1310857 | 4.04115 | -631.172134 |
| -1.41258 | -631.123135 | 1.34835 | -631.1322524 | 4.10536 | -631.172157 |
| -1.34837 | -631.123022 | 1.41256 | -631.1334701 | 4.16956 | -631.172178 |
| -1.28416 | -631.122905 | 1.47677 | -631.1347353 | 4.23376 | -631.172197 |
| -1.21995 | -631.122783 | 1.54098 | -631.1360444 | 4.29796 | -631.172215 |
| -1.15574 | -631.122656 | 1.60519 | -631.1373936 | 4.36217 | -631.172231 |
| -1.09153 | -631.122525 | 1.66939 | -631.138779  | 4.42637 | -631.172246 |
| -1.02732 | -631.122389 | 1.7336  | -631.1401964 | 4.49058 | -631.172259 |
| -0.96311 | -631.12225  | 1.79781 | -631.1416415 | 4.55478 | -631.172271 |
| -0.8989  | -631.122108 | 1.86202 | -631.1431101 | 4.61899 | -631.172281 |

TS1-0\_PRC-->A2

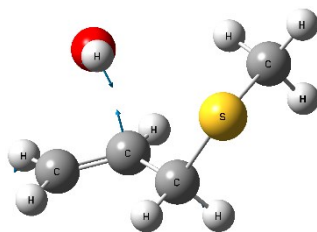

| Method                 | Ee          | E+ZPE        | ΔH                             | ΔG              |           |           |
|------------------------|-------------|--------------|--------------------------------|-----------------|-----------|-----------|
| M06-2X/GD3/cc-pVTZ     | -631.116072 | -630.993859  | -630.984684                    | -631.027076     |           |           |
| M06-2X/DG3/aug-cc-pVTZ | -631.120886 | -630.998882  | -630.989634                    | -631.032217     |           |           |
| MN15/cc-pVTZ           | -630.840204 | -630.718587  | -630.709401                    | -630.751725     |           |           |
| MN15/aug-cc-pVTZ       | -630.848569 | -630.727226  | -630.71799                     | -630.760421     |           |           |
| SVECV-f12              | -631.009218 | -630.8872138 | -630.877966                    | -630.920549     |           |           |
| Coordinates (xyz)      |             |              | Vibrations (cm <sup>-1</sup> ) |                 |           |           |
| C                      | 0.004062    | 0.00652      | 1.537424                       | <b>432.601i</b> | 928.9024  | 3063.759  |
| C                      | 1.959801    | -0.005094    | 1.961348                       | 67.0133         | 945.2913  | 3069.792  |
| S                      | 2.827538    | -1.373287    | 1.394174                       | 126.5364        | 978.2729  | 3126.8251 |
| C                      | 3.234426    | -0.907083    | -0.303387                      | 184.0057        | 989.4728  | 3155.1488 |
| H                      | 0.787902    | 0.588009     | -0.416629                      | 205.0168        | 1024.1629 | 3169.1222 |
| H                      | -0.967982   | 0.442847     | -0.293176                      | 224.1817        | 1114.9658 | 3171.1037 |
| H                      | 1.846808    | -0.014678    | 3.037712                       | 243.5329        | 1241.4038 | 3213.1799 |
| H                      | 2.240907    | 0.950829     | 1.529886                       | 303.693         | 1272.9909 | 3273.0256 |
| H                      | 4.044277    | -1.559358    | -0.619332                      | 390.7919        | 1299.983  | 3775.7798 |
| H                      | 2.367221    | -1.062149    | -0.939079                      | 417.1123        | 1347.586  |           |
| H                      | 3.573015    | 0.126104     | -0.333261                      | 591.7634        | 1443.2935 |           |
| O                      | 0.08187     | -1.328951    | -0.457089                      | 723.479         | 1467.9076 |           |
| H                      | -0.222138   | -1.887293    | 0.274934                       | 773.1853        | 1472.6673 |           |
| H                      | -0.09472    | 1.009061     | 1.987551                       | 795.2476        | 1496.9423 |           |
| O                      | -0.454182   | -0.987449    | 2.131938                       | 852.3666        | 1614.2811 |           |

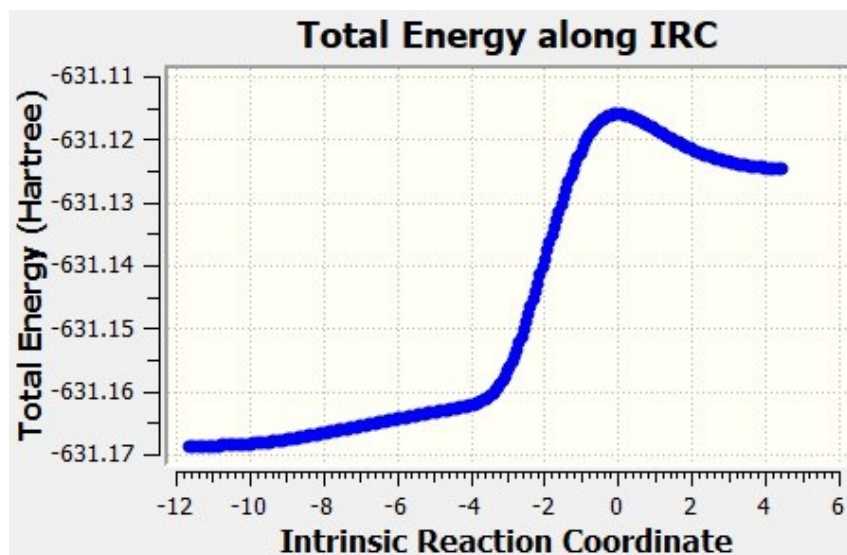

| Rx Coord  | Energy      | Rx Coord | Energy       | Rx Coord | Energy            |
|-----------|-------------|----------|--------------|----------|-------------------|
| -11.6581  | -631.168809 | -6.24272 | -631.1647281 | -0.82824 | -631.119933       |
| -11.59439 | -631.168799 | -6.17901 | -631.1646552 | -0.76453 | -631.119306       |
| -11.53067 | -631.168789 | -6.1153  | -631.1645824 | -0.70081 | -631.118737       |
| -11.46696 | -631.168779 | -6.05158 | -631.16451   | -0.6371  | -631.118227       |
| -11.40325 | -631.168768 | -5.98787 | -631.1644378 | -0.57339 | -631.117777       |
| -11.33953 | -631.168757 | -5.92416 | -631.164366  | -0.50968 | -631.117385       |
| -11.27582 | -631.168746 | -5.86044 | -631.1642945 | -0.44597 | -631.117049       |
| -11.21211 | -631.168734 | -5.79673 | -631.1642235 | -0.38226 | -631.116769       |
| -11.14839 | -631.168721 | -5.73302 | -631.1641527 | -0.31855 | -631.116541       |
| -11.08468 | -631.168709 | -5.66931 | -631.1640823 | -0.25484 | -631.116362       |
| -11.02097 | -631.168695 | -5.6056  | -631.1640121 | -0.19113 | -631.11623        |
| -10.95726 | -631.168681 | -5.54188 | -631.1639424 | -0.12742 | -631.11614        |
| -10.89354 | -631.168667 | -5.47817 | -631.1638731 | -0.06372 | -631.116088       |
| -10.82983 | -631.168652 | -5.41446 | -631.1638046 | <b>0</b> | <b>-631.11607</b> |
| -10.76612 | -631.168637 | -5.35075 | -631.1637369 | 0.06372  | -631.116087       |
| -10.70241 | -631.16862  | -5.28704 | -631.16367   | 0.12742  | -631.116131       |
| -10.6387  | -631.168603 | -5.22332 | -631.1636041 | 0.19113  | -631.1162         |
| -10.57499 | -631.168586 | -5.15961 | -631.1635391 | 0.25484  | -631.116292       |
| -10.51128 | -631.168568 | -5.0959  | -631.1634748 | 0.31855  | -631.116405       |
| -10.44757 | -631.168549 | -5.03219 | -631.1634113 | 0.38226  | -631.116536       |
| -10.38386 | -631.168529 | -4.96848 | -631.1633482 | 0.44597  | -631.116684       |
| -10.32015 | -631.168508 | -4.90477 | -631.1632856 | 0.50968  | -631.116847       |
| -10.25645 | -631.168486 | -4.84106 | -631.1632232 | 0.57339  | -631.117022       |
| -10.19274 | -631.168464 | -4.77735 | -631.163161  | 0.6371   | -631.117207       |
| -10.12903 | -631.16844  | -4.71365 | -631.1630988 | 0.70081  | -631.117402       |
| -10.06532 | -631.168415 | -4.64994 | -631.1630365 | 0.76452  | -631.117604       |

|           |             |          |              |         |             |
|-----------|-------------|----------|--------------|---------|-------------|
| -10.00162 | -631.168388 | -4.58624 | -631.162974  | 0.82824 | -631.117811 |
| -9.93791  | -631.168361 | -4.52254 | -631.162911  | 0.89195 | -631.118023 |
| -9.87421  | -631.168332 | -4.45884 | -631.162847  | 0.95566 | -631.118239 |
| -9.81051  | -631.168301 | -4.39514 | -631.1627819 | 1.01937 | -631.118457 |
| -9.74681  | -631.168268 | -4.33146 | -631.1627151 | 1.08308 | -631.118677 |
| -9.6831   | -631.168233 | -4.26778 | -631.1626458 | 1.1468  | -631.118896 |
| -9.6194   | -631.168197 | -4.20411 | -631.1625733 | 1.21051 | -631.119116 |
| -9.55569  | -631.168158 | -4.14045 | -631.1624963 | 1.27422 | -631.119333 |
| -9.49198  | -631.168117 | -4.07679 | -631.1624132 | 1.33793 | -631.11955  |
| -9.42827  | -631.168073 | -4.01315 | -631.1623219 | 1.40165 | -631.119763 |
| -9.36457  | -631.168028 | -3.94951 | -631.1622198 | 1.46536 | -631.119974 |
| -9.30086  | -631.16798  | -3.88587 | -631.162104  | 1.52907 | -631.120181 |
| -9.23715  | -631.16793  | -3.82222 | -631.1619712 | 1.59278 | -631.120384 |
| -9.17344  | -631.167877 | -3.75856 | -631.1618184 | 1.6565  | -631.120584 |
| -9.10973  | -631.167823 | -3.69489 | -631.1616421 | 1.72021 | -631.12078  |
| -9.04602  | -631.167766 | -3.63122 | -631.1614393 | 1.78392 | -631.120971 |
| -8.98231  | -631.167708 | -3.56755 | -631.1612063 | 1.84764 | -631.121158 |
| -8.9186   | -631.167649 | -3.50389 | -631.1609392 | 1.91135 | -631.121339 |
| -8.85489  | -631.167588 | -3.44023 | -631.1606328 | 1.97506 | -631.121516 |
| -8.79118  | -631.167525 | -3.37657 | -631.1602813 | 2.03878 | -631.121688 |
| -8.72747  | -631.167461 | -3.31291 | -631.1598782 | 2.10249 | -631.121854 |
| -8.66375  | -631.167396 | -3.24924 | -631.1594172 | 2.1662  | -631.122015 |
| -8.60004  | -631.167331 | -3.18555 | -631.1588935 | 2.22992 | -631.122171 |
| -8.53633  | -631.167264 | -3.12186 | -631.1583037 | 2.29363 | -631.122321 |
| -8.47262  | -631.167197 | -3.05816 | -631.1576463 | 2.35734 | -631.122466 |
| -8.40891  | -631.167129 | -2.99446 | -631.1569216 | 2.42106 | -631.122605 |
| -8.3452   | -631.167061 | -2.93076 | -631.1561309 | 2.48477 | -631.122739 |
| -8.28149  | -631.166993 | -2.86705 | -631.155277  | 2.54848 | -631.122868 |
| -8.21778  | -631.166924 | -2.80334 | -631.1543631 | 2.6122  | -631.122992 |
| -8.15407  | -631.166855 | -2.73963 | -631.1533931 | 2.67591 | -631.12311  |
| -8.09036  | -631.166786 | -2.67591 | -631.1523713 | 2.73962 | -631.123224 |
| -8.02665  | -631.166717 | -2.6122  | -631.151302  | 2.80334 | -631.123333 |
| -7.96294  | -631.166648 | -2.54849 | -631.1501898 | 2.86705 | -631.123437 |
| -7.89923  | -631.166578 | -2.48478 | -631.1490393 | 2.93076 | -631.123536 |
| -7.83552  | -631.166509 | -2.42106 | -631.1478551 | 2.99448 | -631.123631 |
| -7.77181  | -631.16644  | -2.35735 | -631.1466419 | 3.05819 | -631.123721 |
| -7.7081   | -631.16637  | -2.29364 | -631.1454042 | 3.1219  | -631.123806 |
| -7.64438  | -631.166301 | -2.22992 | -631.1441468 | 3.18562 | -631.123887 |
| -7.58067  | -631.166231 | -2.16621 | -631.1428742 | 3.24933 | -631.123963 |
| -7.51696  | -631.166161 | -2.1025  | -631.141591  | 3.31305 | -631.124035 |
| -7.45325  | -631.166091 | -2.03878 | -631.1403016 | 3.37676 | -631.124103 |
| -7.38954  | -631.166021 | -1.97507 | -631.1390105 | 3.44048 | -631.124167 |



|          |             |          |              |         |             |
|----------|-------------|----------|--------------|---------|-------------|
| -7.32583 | -631.16595  | -1.91136 | -631.137722  | 3.50419 | -631.124226 |
| -7.26211 | -631.16588  | -1.84765 | -631.1364403 | 3.56791 | -631.124282 |
| -7.1984  | -631.165809 | -1.78393 | -631.1351696 | 3.63162 | -631.124334 |
| -7.13469 | -631.165738 | -1.72022 | -631.1339141 | 3.69533 | -631.124381 |
| -7.07098 | -631.165666 | -1.65651 | -631.1326778 | 3.75905 | -631.124425 |
| -7.00727 | -631.165595 | -1.59279 | -631.1314645 | 3.82276 | -631.124466 |
| -6.94355 | -631.165523 | -1.52908 | -631.1302781 | 3.88648 | -631.124503 |
| -6.87984 | -631.165451 | -1.46537 | -631.1291223 | 3.95019 | -631.124536 |
| -6.81613 | -631.165379 | -1.40165 | -631.1280005 | 4.01391 | -631.124566 |
| -6.75242 | -631.165307 | -1.33794 | -631.1269162 | 4.07762 | -631.124593 |
| -6.6887  | -631.165235 | -1.27423 | -631.1258726 | 4.14133 | -631.124617 |
| -6.62499 | -631.165163 | -1.21051 | -631.1248727 | 4.20505 | -631.124637 |
| -6.56128 | -631.165091 | -1.1468  | -631.1239192 | 4.26876 | -631.124655 |
| -6.49757 | -631.165019 | -1.08309 | -631.123015  | 4.33247 | -631.12467  |
| -6.43386 | -631.164946 | -1.01938 | -631.1221622 | 4.39618 | -631.124682 |
| -6.37014 | -631.164874 | -0.95566 | -631.1213632 | 4.45988 | -631.124691 |
| -6.30643 | -631.164801 | -0.89195 | -631.1206198 |         |             |

TS1-1\_A1O-->Pw1

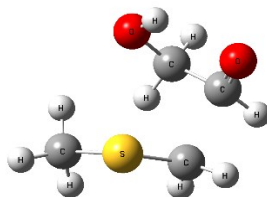

| Method                 | Ee          | E+ZPE       | $\Delta H$                     | $\Delta G$       |           |           |
|------------------------|-------------|-------------|--------------------------------|------------------|-----------|-----------|
| M06-2X/GD3/cc-pVTZ     | -706.372631 | -706.244149 | -706.234636                    | -706.278099      |           |           |
| M06-2X/DG3/aug-cc-pVTZ | -706.378811 | -706.250456 | -706.240916                    | -706.28446       |           |           |
| MN15/cc-pVTZ           | -706.047984 | -705.9201   | -705.910625                    | -705.953903      |           |           |
| MN15/aug-cc-pVTZ       | -706.057957 | -705.930311 | -705.920801                    | -705.964181      |           |           |
| SVECV-f12              | -706.249713 | -706.121358 | -706.111818                    | -706.155362      |           |           |
| Coordinates (xyz)      |             |             | Vibrations (cm <sup>-1</sup> ) |                  |           |           |
| C                      | -0.01634    | -0.013824   | 0.010754                       | <b>322.8753i</b> | 925.2187  | 1559.9129 |
| C                      | 0.004062    | 0.00652     | 1.537424                       | 82.8225          | 959.4282  | 2951.0094 |
| C                      | 1.959801    | -0.005094   | 1.961348                       | 123.5189         | 980.9239  | 3004.9018 |
| S                      | 2.827538    | -1.373287   | 1.394174                       | 159.2951         | 987.005   | 3081.8199 |
| C                      | 3.234426    | -0.907083   | -0.303387                      | 180.9035         | 1063.7081 | 3087.5014 |
| H                      | 0.787902    | 0.588009    | -0.416629                      | 219.399          | 1100.8333 | 3117.331  |
| H                      | -0.967982   | 0.442847    | -0.293176                      | 231.8654         | 1147.9583 | 3172.0119 |
| H                      | 1.846808    | -0.014678   | 3.037712                       | 307.6595         | 1239.4514 | 3187.0818 |
| H                      | 2.240907    | 0.950829    | 1.529886                       | 344.3953         | 1314.8658 | 3233.5655 |
| H                      | 4.044277    | -1.559358   | -0.619332                      | 420.6083         | 1342.4689 | 3734.0615 |
| H                      | 2.367221    | -1.062149   | -0.939079                      | 515.0442         | 1351.1529 |           |
| H                      | 3.573015    | 0.126104    | -0.333261                      | 690.2412         | 1416.4478 |           |
| O                      | 0.08187     | -1.328951   | -0.457089                      | 733.9934         | 1442.4889 |           |
| H                      | -0.222138   | -1.887293   | 0.274934                       | 747.1656         | 1464.8531 |           |
| H                      | -0.09472    | 1.009061    | 1.987551                       | 829.9593         | 1496.4564 |           |
| O                      | -0.454182   | -0.987449   | 2.131938                       | 874.8602         | 1517.1814 |           |

Pw1

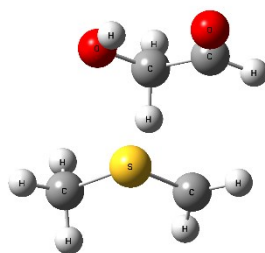

| Method                 | Ee          | E+ZPE       | $\Delta H$                     | $\Delta G$  |           |           |
|------------------------|-------------|-------------|--------------------------------|-------------|-----------|-----------|
| M06-2X/GD3/cc-pVTZ     | -706.386081 | -706.260459 | -706.248621                    | -706.298413 |           |           |
| M06-2X/DG3/aug-cc-pVTZ | -706.39189  | -706.26655  | -706.254614                    | -706.304656 |           |           |
| MN15/cc-pVTZ           | -706.063029 | -705.938084 | -705.926141                    | -705.976128 |           |           |
| MN15/aug-cc-pVTZ       | -706.072604 | -705.948029 | -705.935983                    | -705.986417 |           |           |
| SVECV-f12              | -706.264316 | -706.138976 | -706.12704                     | -706.177082 |           |           |
| Coordinates (xyz)      |             |             | Vibrations (cm <sup>-1</sup> ) |             |           |           |
| C                      | -0.000363   | -0.03769    | 0.00394                        | 48.3174     | 863.1452  | 1852.2459 |
| C                      | 0.030074    | 0.009788    | 1.506851                       | 62.3161     | 883.3843  | 2985.9158 |
| C                      | 3.179305    | 0.001772    | 1.257552                       | 81.6434     | 905.012   | 3022.6141 |
| S                      | 3.170824    | -1.635417   | 0.782822                       | 88.7179     | 972.9873  | 3045.5843 |
| C                      | 3.272013    | -1.476618   | -1.012838                      | 117.9991    | 1031.074  | 3078.0541 |
| H                      | 0.876549    | 0.514919    | -0.356541                      | 130.9481    | 1111.341  | 3167.5887 |
| H                      | -0.888508   | 0.51137     | -0.331571                      | 168.2226    | 1162.2006 | 3169.3689 |
| H                      | 3.111382    | 0.197626    | 2.315798                       | 234.7451    | 1265.0983 | 3176.3956 |
| H                      | 3.574066    | 0.755467    | 0.592675                       | 284.7295    | 1311.4958 | 3292.0151 |
| H                      | 3.42507     | -2.474785   | -1.414018                      | 288.0327    | 1348.4013 | 3762.941  |
| H                      | 2.338366    | -1.075757   | -1.399934                      | 316.0943    | 1397.0623 |           |
| H                      | 4.115366    | -0.844718   | -1.28119                       | 370.1264    | 1407.8051 |           |
| O                      | -0.019869   | -1.345427   | -0.479998                      | 503.479     | 1444.463  |           |
| H                      | 0.092912    | -1.92697    | 0.285569                       | 727.1641    | 1470.4837 |           |
| H                      | 0.09086     | 1.012998    | 1.961922                       | 731.4057    | 1475.7971 |           |
| O                      | -0.017311   | -0.985434   | 2.177535                       | 772.4884    | 1489.1552 |           |

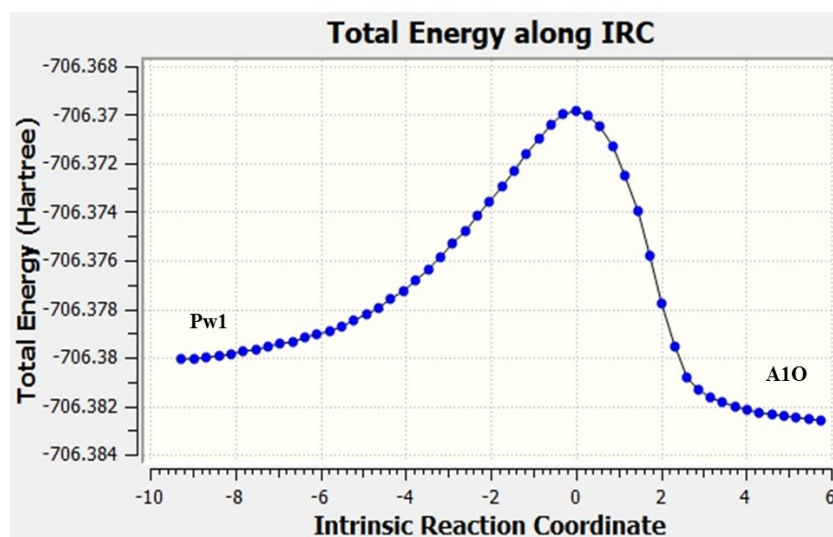

| Rx Coord | Energy      | Rx Coord | Energy      | Rx Coord | Energy           |
|----------|-------------|----------|-------------|----------|------------------|
| -6.95196 | -706.386009 | -3.47893 | -706.382837 | <b>0</b> | <b>-706.3726</b> |
| -6.66306 | -706.385963 | -3.18901 | -706.382112 | 0.28992  | -706.372812      |
| -6.37486 | -706.3859   | -2.89907 | -706.381294 | 0.5797   | -706.373379      |
| -6.08585 | -706.385814 | -2.60915 | -706.380391 | 0.86958  | -706.374362      |
| -5.79673 | -706.385705 | -2.31921 | -706.379408 | 1.15937  | -706.37575       |
| -5.50749 | -706.38556  | -2.02929 | -706.378362 | 1.44925  | -706.377419      |
| -5.21791 | -706.385373 | -1.73936 | -706.37726  | 1.73892  | -706.379054      |
| -4.92829 | -706.385136 | -1.44947 | -706.376131 | 2.02621  | -706.380141      |
| -4.63848 | -706.384834 | -1.15955 | -706.375029 | 2.2954   | -706.380535      |
| -4.34864 | -706.384462 | -0.86967 | -706.374052 | 2.58147  | -706.380749      |
| -4.05875 | -706.384011 | -0.57975 | -706.373287 | 2.86548  | -706.380855      |
| -3.76885 | -706.383471 | -0.28991 | -706.372801 | 3.15039  | -706.380902      |

**TS\_P1**

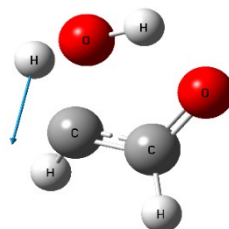

| Method                 | Ee          | E+ZPE       | $\Delta H$                     | $\Delta G$        |           |           |
|------------------------|-------------|-------------|--------------------------------|-------------------|-----------|-----------|
| M06-2X/GD3/cc-pVTZ     | -228.930282 | -228.874149 | -228.869097                    | -228.900335       |           |           |
| M06-2X/DG3/aug-cc-pVTZ | -228.935276 | -228.879224 | -228.874158                    | -228.905424       |           |           |
| MN15/cc-pVTZ           | -228.776634 | -228.720568 | -228.715585                    | -228.746671       |           |           |
| MN15/aug-cc-pVTZ       | -228.782753 | -228.726774 | -228.72179                     | -228.752877       |           |           |
| SVECV-f12              | -228.906497 | -228.850445 | -228.845379                    | -228.876645       |           |           |
| Coordinates (xyz)      |             |             | Vibrations (cm <sup>-1</sup> ) |                   |           |           |
| C                      | -0.011872   | -0.013671   | -0.014986                      | <b>1663.5052i</b> | 1089.6402 | 3175.8854 |
| H                      | 0.001838    | -0.001555   | 1.319941                       | 278.287           | 1165.9798 | 3274.2473 |
| H                      | 0.903104    | 0.004488    | -0.581971                      | 446.3785          | 1301.3211 |           |
| O                      | 0.030972    | -1.107912   | 1.08898                        | 526.047           | 1369.8605 |           |
| H                      | -0.920605   | -1.410486   | 1.009326                       | 721.5501          | 1415.108  |           |
| C                      | -1.312789   | -0.079231   | -0.564813                      | 757.0429          | 1691.1072 |           |
| H                      | -1.537055   | 0.552896    | -1.43227                       | 864.2118          | 2468.5877 |           |
| O                      | -2.17472    | -0.800181   | -0.053724                      | 1000.2628         | 3058.376  |           |

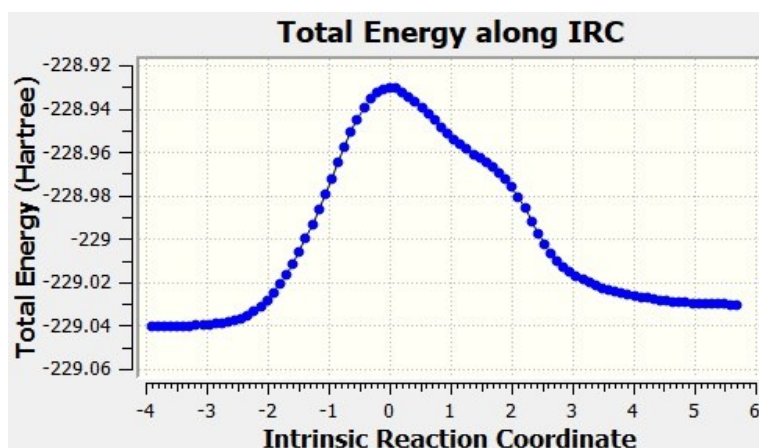

| Rx Coord | Energy      | Rx Coord | Energy           | Rx Coord | Energy      |
|----------|-------------|----------|------------------|----------|-------------|
| -3.90658 | -229.040612 | -0.63422 | -228.951046      | 2.64059  | -229.006975 |
| -3.8015  | -229.0406   | -0.52851 | -228.944942      | 2.74576  | -229.010278 |
| -3.69609 | -229.040566 | -0.42281 | -228.93974       | 2.85119  | -229.012966 |
| -3.5906  | -229.040508 | -0.3171  | -228.935622      | 2.95672  | -229.015215 |
| -3.48505 | -229.040424 | -0.2114  | -228.932655      | 3.06227  | -229.017133 |
| -3.37943 | -229.040308 | -0.10571 | -228.93087       | 3.16783  | -229.018785 |
| -3.27378 | -229.040158 | <b>0</b> | <b>-228.9303</b> | 3.27342  | -229.020219 |
| -3.16811 | -229.039969 | 0.1057   | -228.930825      | 3.37903  | -229.021469 |
| -3.06245 | -229.039737 | 0.21134  | -228.932281      | 3.48464  | -229.022562 |
| -2.95679 | -229.039458 | 0.31703  | -228.934371      | 3.59026  | -229.023521 |
| -2.85117 | -229.039126 | 0.42271  | -228.936856      | 3.69588  | -229.024367 |
| -2.74565 | -229.03873  | 0.52841  | -228.939598      | 3.80153  | -229.025116 |
| -2.64046 | -229.038249 | 0.63411  | -228.942491      | 3.90718  | -229.025785 |
| -2.53565 | -229.037613 | 0.73981  | -228.945456      | 4.01285  | -229.026385 |
| -2.43056 | -229.0367   | 0.8455   | -228.948409      | 4.11853  | -229.026926 |
| -2.32515 | -229.035387 | 0.95119  | -228.951274      | 4.22423  | -229.027412 |
| -2.21958 | -229.0336   | 1.05686  | -228.953989      | 4.32992  | -229.027849 |
| -2.11396 | -229.031295 | 1.16251  | -228.956519      | 4.43562  | -229.028243 |
| -2.0083  | -229.028449 | 1.26812  | -228.958845      | 4.54133  | -229.028596 |
| -1.90263 | -229.025046 | 1.3737   | -228.960993      | 4.64703  | -229.02891  |
| -1.79695 | -229.021086 | 1.47922  | -228.963008      | 4.75273  | -229.029187 |
| -1.69127 | -229.016571 | 1.5847   | -228.964997      | 4.85843  | -229.029427 |
| -1.58557 | -229.011517 | 1.6902   | -228.967097      | 4.96414  | -229.029636 |
| -1.47988 | -229.005948 | 1.79572  | -228.969511      | 5.06983  | -229.029813 |
| -1.37418 | -228.999899 | 1.9013   | -228.972472      | 5.17553  | -229.029963 |
| -1.26847 | -228.993419 | 2.00692  | -228.976213      | 5.28121  | -229.030082 |
| -1.16277 | -228.98658  | 2.11259  | -228.980813      | 5.38691  | -229.030177 |
| -1.05706 | -228.979468 | 2.21829  | -228.986138      | 5.49256  | -229.030245 |
| -0.95135 | -228.972199 | 2.32398  | -228.991866      | 5.59827  | -229.030291 |
| -0.84564 | -228.964913 | 2.42966  | -228.997567      | 5.70371  | -229.03031  |
| -0.73993 | -228.957789 | 2.53526  | -229.002733      |          |             |

TS1-2\_A1O-->Pw2

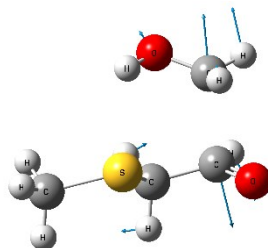

| Method                 |           |           |           | Ee                             | E+ZPE       | $\Delta H$  | $\Delta G$  |
|------------------------|-----------|-----------|-----------|--------------------------------|-------------|-------------|-------------|
| M06-2X/GD3/cc-pVTZ     |           |           |           | -706.36984                     | -706.241894 | -706.231985 | -706.276937 |
| M06-2X/DG3/aug-cc-pVTZ |           |           |           | -706.376107                    | -706.248245 | -706.238326 | -706.28327  |
| MN15/cc-pVTZ           |           |           |           | -706.045564                    | -705.918058 | -705.908214 | -705.95285  |
| MN15/aug-cc-pVTZ       |           |           |           | -706.05559                     | -705.928254 | -705.918395 | -705.963061 |
| SVECV-f12              |           |           |           | -706.246767                    | -706.118905 | -706.108986 | -706.15393  |
| Coordinates (xyz)      |           |           |           | Vibrations (cm <sup>-1</sup> ) |             |             |             |
| C                      | -0.029012 | -0.031711 | -0.027313 | <b>316.9004i</b>               | 943.4709    | 1595.9688   |             |
| C                      | 0.012476  | 0.027186  | 2.087292  | 46.5785                        | 962.8376    | 2951.976    |             |
| C                      | 1.517942  | -0.012251 | 2.300446  | 112.9263                       | 981.1808    | 3062.7666   |             |
| S                      | 2.243464  | -1.552764 | 1.67127   | 137.6114                       | 998.0255    | 3070.1181   |             |
| C                      | 3.980998  | -1.159199 | 1.984076  | 164.4956                       | 1047.5459   | 3120.041    |             |
| H                      | -0.879776 | 0.610464  | -0.207558 | 191.1766                       | 1120.1856   | 3132.258    |             |
| H                      | -0.184267 | -1.103023 | -0.068496 | 224.685                        | 1157.8971   | 3150.1425   |             |
| H                      | 1.700553  | 0.054919  | 3.375174  | 254.7087                       | 1248.2223   | 3169.0324   |             |
| H                      | 1.987813  | 0.839596  | 1.809146  | 335.5911                       | 1280.2895   | 3259.9009   |             |
| H                      | 4.570888  | -1.998242 | 1.624253  | 363.0424                       | 1357.0096   | 3704.404    |             |
| H                      | 4.281288  | -0.256421 | 1.455785  | 544.5354                       | 1374.3275   |             |             |
| H                      | 4.152315  | -1.036561 | 3.051338  | 623.5569                       | 1411.7323   |             |             |
| O                      | 1.114832  | 0.449149  | -0.545098 | 722.2037                       | 1457.9646   |             |             |
| H                      | 1.805306  | -0.219518 | -0.410385 | 750.1214                       | 1475.1354   |             |             |
| H                      | -0.396568 | 1.052697  | 2.091343  | 757.5662                       | 1489.078    |             |             |
| O                      | -0.711121 | -0.932441 | 2.365269  | 869.0533                       | 1505.5689   |             |             |

Pw2

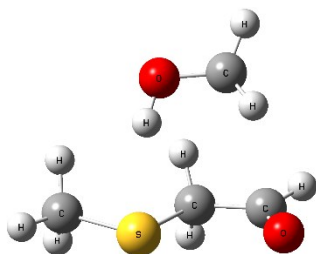

| Method                 | Ee          | E+ZPE       | $\Delta H$                     | $\Delta G$  |           |           |
|------------------------|-------------|-------------|--------------------------------|-------------|-----------|-----------|
| M06-2X/GD3/cc-pVTZ     | -706.380149 | -706.254175 | -706.242415                    | -706.291834 |           |           |
| M06-2X/DG3/aug-cc-pVTZ | -706.386257 | -706.260395 | -706.248605                    | -706.298237 |           |           |
| MN15/cc-pVTZ           | -706.056307 | -705.931004 | -705.91918                     | -705.968778 |           |           |
| MN15/aug-cc-pVTZ       | -706.066109 | -705.941024 | -705.929168                    | -705.978905 |           |           |
| Coordinates (xyz)      |             |             | Vibrations (cm <sup>-1</sup> ) |             |           |           |
| C                      | -0.047129   | 0.014027    | 0.029548                       | 44.9487     | 800.846   | 1855.6458 |
| C                      | 0.011205    | 0.005261    | 3.198729                       | 61.9505     | 958.3122  | 2970.263  |
| C                      | 1.494824    | -0.004816   | 2.955979                       | 100.1813    | 978.7246  | 3051.7241 |
| S                      | 2.091055    | -1.674431   | 2.601277                       | 112.3173    | 999.4632  | 3069.1929 |
| C                      | 3.793702    | -1.21964    | 2.186338                       | 137.1662    | 1009.8738 | 3097.3757 |
| H                      | -0.399146   | 0.792242    | -0.628401                      | 170.5665    | 1100.4177 | 3150.2267 |
| H                      | -0.734137   | -0.697605   | 0.466302                       | 174.5233    | 1199.5461 | 3150.8623 |
| H                      | 1.991461    | 0.401522    | 3.841592                       | 183.8967    | 1241.7741 | 3170.3955 |
| H                      | 1.708989    | 0.660611    | 2.115699                       | 221.2589    | 1296.805  | 3284.337  |
| H                      | 4.314331    | -2.136723   | 1.923429                       | 256.0087    | 1357.9581 | 3689.0035 |
| H                      | 3.812095    | -0.538635   | 1.337082                       | 260.0285    | 1407.6356 |           |
| H                      | 4.287512    | -0.763509   | 3.041518                       | 615.0828    | 1413.3175 |           |
| O                      | 1.225466    | -0.383699   | -0.214748                      | 634.6959    | 1438.8514 |           |
| H                      | 1.443646    | -1.118922   | 0.379113                       | 672.2301    | 1475.9703 |           |
| H                      | -0.426054   | 1.01302     | 3.318453                       | 707.9371    | 1488.3984 |           |
| O                      | -0.668318   | -0.979423   | 3.274819                       | 741.7853    | 1495.5792 |           |



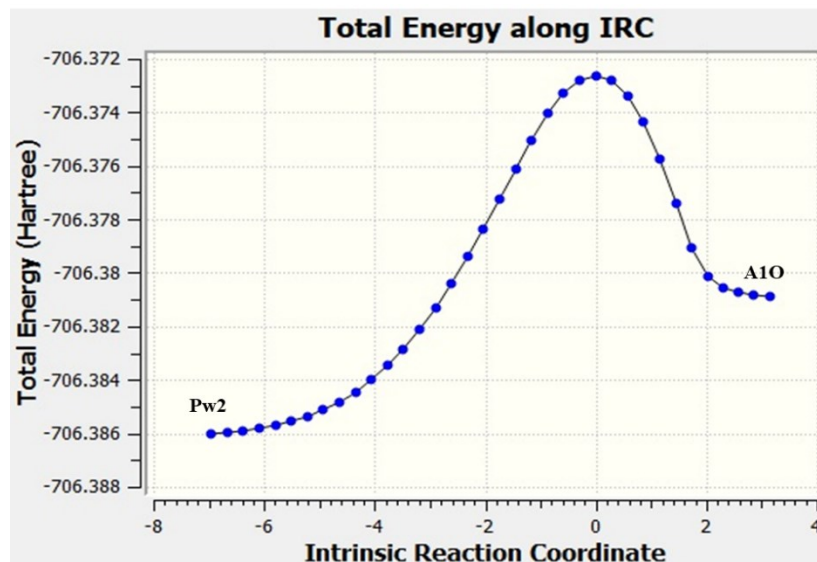

| Rx Coord | Energy      | Rx Coord | Energy           | Rx Coord | Energy      |
|----------|-------------|----------|------------------|----------|-------------|
| -9.25657 | -706.380081 | -4.05046 | -706.377242      | 1.15726  | -706.37248  |
| -8.96723 | -706.380039 | -3.76117 | -706.376826      | 1.4466   | -706.373975 |
| -8.67785 | -706.379984 | -3.47185 | -706.376365      | 1.7359   | -706.375782 |
| -8.3885  | -706.379922 | -3.18252 | -706.375865      | 2.02524  | -706.377758 |
| -8.09914 | -706.379848 | -2.89317 | -706.375331      | 2.31444  | -706.379579 |
| -7.80981 | -706.379766 | -2.60383 | -706.374768      | 2.60232  | -706.380822 |
| -7.52047 | -706.379672 | -2.31448 | -706.374178      | 2.87595  | -706.381343 |
| -7.23119 | -706.379571 | -2.02515 | -706.373566      | 3.16124  | -706.381638 |
| -6.94194 | -706.379459 | -1.7358  | -706.372934      | 3.44988  | -706.381867 |
| -6.65275 | -706.379338 | -1.44647 | -706.372286      | 3.73872  | -706.382051 |
| -6.36361 | -706.379204 | -1.15713 | -706.371632      | 4.02713  | -706.382189 |
| -6.07456 | -706.379057 | -0.86786 | -706.370997      | 4.31439  | -706.382292 |
| -5.78553 | -706.378889 | -0.57857 | -706.370423      | 4.60187  | -706.382372 |
| -5.4965  | -706.378699 | -0.28936 | -706.369999      | 4.89039  | -706.38244  |
| -5.20737 | -706.378479 | <b>0</b> | <b>-706.3698</b> | 5.1795   | -706.382499 |
| -4.91818 | -706.378227 | 0.28938  | -706.370007      | 5.4688   | -706.382552 |
| -4.62895 | -706.377939 | 0.57865  | -706.370505      | 5.75811  | -706.382595 |
| -4.33972 | -706.377613 | 0.86799  | -706.371331      |          |             |

TS1-3\_A1<-->A2

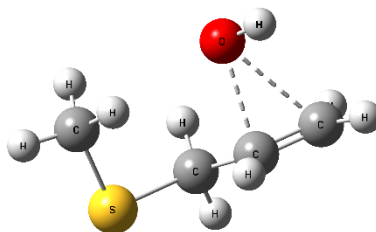

| Method                 | Ee          | E+ZPE       | $\Delta H$                     | $\Delta G$       |           |           |
|------------------------|-------------|-------------|--------------------------------|------------------|-----------|-----------|
| M06-2X/GD3/cc-pVTZ     | -631.115841 | -630.994818 | -630.985009                    | -631.029875      |           |           |
| M06-2X/DG3/aug-cc-pVTZ | -631.120908 | -630.999956 | -630.99015                     | -631.034844      |           |           |
| MN15/cc-pVTZ           | -630.839313 | -630.718699 | -630.708983                    | -630.752966      |           |           |
| MN15/aug-cc-pVTZ       | -630.848067 | -630.727598 | -630.717881                    | -630.761767      |           |           |
| SVECV-f12              | -631.011037 | -630.890085 | -630.880279                    | -630.924973      |           |           |
| Coordinates (xyz)      |             |             | Vibrations (cm <sup>-1</sup> ) |                  |           |           |
| C                      | -0.091764   | 0.094728    | 0.085393                       | <b>278.5832i</b> | 935.4022  | 3074.7312 |
| C                      | 0.015293    | -0.08556    | 1.414864                       | 33.0072          | 946.1079  | 3080.5674 |
| C                      | 1.333489    | -0.05609    | 2.136581                       | 87.712           | 977.9305  | 3122.6585 |
| S                      | 1.246291    | -0.348009   | 3.918729                       | 124.2013         | 998.6393  | 3164.9051 |
| C                      | 0.828481    | -2.107249   | 3.948516                       | 182.6422         | 1023.9013 | 3165.8234 |
| H                      | 0.787184    | 0.156439    | -0.542791                      | 185.6846         | 1131.8883 | 3178.6986 |
| H                      | -1.057674   | 0.158942    | -0.396408                      | 228.4949         | 1211.2437 | 3190.2104 |
| H                      | -0.876654   | -0.105151   | 2.029792                       | 266.0534         | 1264.505  | 3259.9602 |
| H                      | 1.772856    | 0.937786    | 2.042391                       | 314.0578         | 1310.2287 | 3801.804  |
| H                      | 2.019706    | -0.767872   | 1.677803                       | 411.6978         | 1360.1578 |           |
| H                      | 0.836428    | -2.405578   | 4.994189                       | 555.2532         | 1433.1315 |           |
| H                      | -0.151916   | -2.286039   | 3.518412                       | 694.6032         | 1448.1934 |           |
| H                      | 1.571447    | -2.680831   | 3.399094                       | 721.89           | 1466.1472 |           |
| O                      | 0.053244    | -2.207019   | 0.949369                       | 776.5143         | 1479.6069 |           |
| H                      | -0.766944   | -2.324941   | 0.447782                       | 850.3733         | 1633.277  |           |

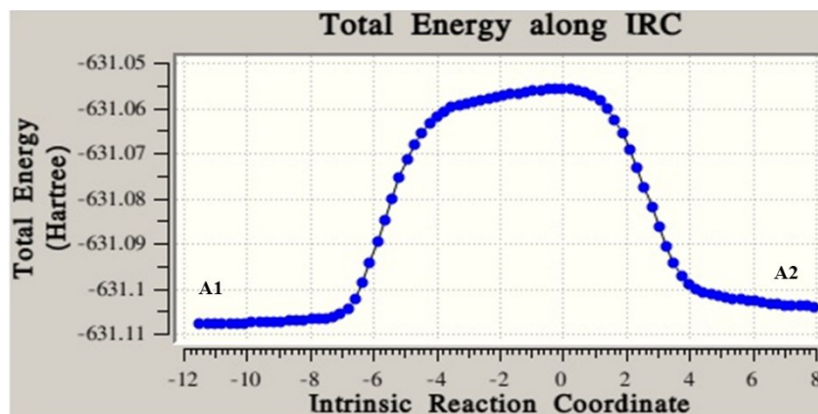

| Rx Coord  | Energy      | Rx Coord | Energy           | Rx Coord | Energy      |
|-----------|-------------|----------|------------------|----------|-------------|
| -11.48097 | -631.107987 | -4.92841 | -631.071629      | 1.64303  | -631.062582 |
| -11.24619 | -631.107953 | -4.69361 | -631.068233      | 1.87784  | -631.065584 |
| -11.01141 | -631.107914 | -4.45881 | -631.065501      | 2.11265  | -631.069165 |
| -10.77661 | -631.107869 | -4.22403 | -631.063417      | 2.34746  | -631.073225 |
| -10.54182 | -631.107819 | -3.98929 | -631.061877      | 2.58227  | -631.077597 |
| -10.30703 | -631.107763 | -3.7546  | -631.060785      | 2.81708  | -631.082099 |
| -10.07224 | -631.107702 | -3.51996 | -631.059989      | 3.05189  | -631.08653  |
| -9.83745  | -631.107635 | -3.28544 | -631.059394      | 3.28668  | -631.090668 |
| -9.60268  | -631.107564 | -3.05091 | -631.058939      | 3.52142  | -631.094275 |
| -9.3679   | -631.107487 | -2.81632 | -631.058554      | 3.75595  | -631.0971   |
| -9.13314  | -631.107405 | -2.58163 | -631.058213      | 3.9891   | -631.098982 |
| -8.89837  | -631.107316 | -2.34698 | -631.057891      | 4.21916  | -631.100078 |
| -8.66364  | -631.107224 | -2.11234 | -631.057596      | 4.45249  | -631.10082  |
| -8.42893  | -631.107125 | -1.87763 | -631.057315      | 4.68665  | -631.101365 |
| -8.19439  | -631.107021 | -1.64289 | -631.057049      | 4.9206   | -631.101772 |
| -7.96044  | -631.106908 | -1.40816 | -631.056794      | 5.15397  | -631.102065 |
| -7.72869  | -631.106774 | -1.17345 | -631.056553      | 5.38694  | -631.102279 |
| -7.49779  | -631.106568 | -0.93873 | -631.056326      | 5.61998  | -631.102479 |
| -7.26429  | -631.10624  | -0.70404 | -631.05612       | 5.85406  | -631.102672 |
| -7.03228  | -631.10573  | -0.46927 | -631.055955      | 6.08824  | -631.102881 |
| -6.80638  | -631.104647 | -0.23468 | -631.055838      | 6.32244  | -631.103101 |
| -6.57204  | -631.102262 | <b>0</b> | <b>-631.0558</b> | 6.5567   | -631.103329 |
| -6.33727  | -631.098754 | 0.23453  | -631.055852      | 6.79065  | -631.103546 |
| -6.10247  | -631.094484 | 0.46918  | -631.056066      | 7.02489  | -631.103732 |
| -5.86766  | -631.089777 | 0.70392  | -631.056514      | 7.24874  | -631.103863 |
| -5.63284  | -631.08491  | 0.93867  | -631.057277      | 7.47961  | -631.103944 |
| -5.39803  | -631.080125 | 1.17344  | -631.058481      | 7.70422  | -631.103987 |
| -5.16322  | -631.075636 | 1.40823  | -631.060226      | 7.93825  | -631.104017 |

TS1-4\_A1O<-->A2O

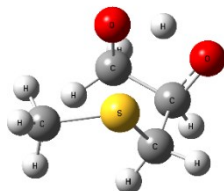

| Method                 |           |           |           | Ee                             | E+ZPE       | $\Delta H$  | $\Delta G$  |
|------------------------|-----------|-----------|-----------|--------------------------------|-------------|-------------|-------------|
| M06-2X/GD3/cc-pVTZ     |           |           |           | -706.35277                     | -706.226772 | -706.218015 | -706.259817 |
| M06-2X/DG3/aug-cc-pVTZ |           |           |           | -706.358956                    | -706.232993 | -706.224207 | -706.26615  |
| MN15/cc-pVTZ           |           |           |           | -706.033975                    | -705.908156 | -705.899465 | -705.940995 |
| MN15/aug-cc-pVTZ       |           |           |           | -706.044011                    | -705.918387 | -705.909678 | -705.951275 |
| SVECV-f12              |           |           |           | -706.231886                    | -706.105923 | -706.097137 | -706.13908  |
| Coordinates (xyz)      |           |           |           | Vibrations (cm <sup>-1</sup> ) |             |             |             |
| C                      | -0.008725 | -0.011435 | -0.002784 | <b>i1987.6492</b>              | 947.9591    | 1501.7801   |             |
| C                      | -0.008285 | 0.009031  | 1.566384  | 98.4452                        | 964.5608    | 2037.9832   |             |
| C                      | 1.5501    | -0.003021 | 1.984837  | 117.699                        | 997.3712    | 2978.0151   |             |
| S                      | 2.443909  | -1.337957 | 1.250352  | 138.5394                       | 1089.3478   | 3037.5914   |             |
| C                      | 3.191287  | -0.601392 | -0.21878  | 200.8762                       | 1121.6237   | 3081.4324   |             |
| H                      | 0.769884  | 0.58611   | -0.481432 | 261.0047                       | 1147.0946   | 3085.0079   |             |
| H                      | -0.992669 | 0.37942   | -0.301392 | 319.7174                       | 1184.3867   | 3096.3672   |             |
| H                      | 1.553161  | -0.165502 | 3.059932  | 387.3026                       | 1221.6415   | 3169.1962   |             |
| H                      | 2.005167  | 0.95439   | 1.739507  | 520.1951                       | 1249.2154   | 3174.8186   |             |
| H                      | 4.074142  | -1.191918 | -0.449229 | 668.3462                       | 1267.3662   | 3176.7496   |             |
| H                      | 2.493461  | -0.654058 | -1.050144 | 702.5509                       | 1292.8642   |             |             |
| H                      | 3.487126  | 0.425252  | -0.018823 | 719.6969                       | 1344.7749   |             |             |
| O                      | 0.100478  | -1.352451 | -0.26534  | 770.5969                       | 1353.7921   |             |             |
| H                      | -0.339164 | -1.65162  | 0.773109  | 781.6003                       | 1433.9666   |             |             |
| H                      | -0.433624 | 0.909563  | 2.022574  | 841.8241                       | 1464.419    |             |             |
| O                      | -0.60571  | -1.127859 | 1.912343  | 866.8984                       | 1476.8087   |             |             |

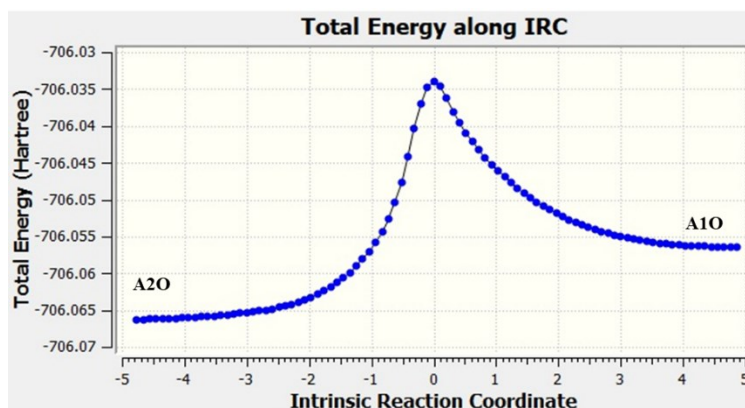

| Rx Coord | Energy      | Rx Coord | Energy      | Rx Coord | Energy      |
|----------|-------------|----------|-------------|----------|-------------|
| -4.76199 | -706.066286 | -1.44801 | -706.060637 | 1.8627   | -706.051397 |
| -4.65846 | -706.06627  | -1.34443 | -706.059889 | 1.96629  | -706.051871 |
| -4.55489 | -706.066248 | -1.24087 | -706.05905  | 2.06988  | -706.052312 |
| -4.45134 | -706.066223 | -1.13734 | -706.058104 | 2.17348  | -706.05272  |
| -4.34775 | -706.066192 | -1.03385 | -706.057031 | 2.27707  | -706.053099 |
| -4.24418 | -706.066157 | -0.93042 | -706.055798 | 2.38066  | -706.05345  |
| -4.1406  | -706.066117 | -0.82704 | -706.05435  | 2.48425  | -706.053774 |
| -4.03702 | -706.066073 | -0.72369 | -706.052614 | 2.58784  | -706.054072 |
| -3.93342 | -706.066023 | -0.62054 | -706.050451 | 2.69143  | -706.054346 |
| -3.82984 | -706.065969 | -0.51759 | -706.047699 | 2.79503  | -706.054598 |
| -3.72625 | -706.06591  | -0.41424 | -706.044184 | 2.89862  | -706.054827 |
| -3.62266 | -706.065846 | -0.31071 | -706.04037  | 3.00221  | -706.055037 |
| -3.51908 | -706.065778 | -0.20714 | -706.036984 | 3.10579  | -706.055226 |
| -3.41551 | -706.065704 | -0.10359 | -706.034713 | 3.20938  | -706.055397 |
| -3.31194 | -706.065625 | 0        | -706.034    | 3.31296  | -706.05555  |
| -3.20839 | -706.065541 | 0.1035   | -706.03466  | 3.41654  | -706.055687 |
| -3.10484 | -706.065449 | 0.20684  | -706.036257 | 3.52012  | -706.055808 |
| -3.00131 | -706.065349 | 0.31006  | -706.038049 | 3.62368  | -706.055914 |
| -2.89779 | -706.065239 | 0.41305  | -706.0396   | 3.72724  | -706.056007 |
| -2.79427 | -706.065117 | 0.51635  | -706.040973 | 3.83078  | -706.056087 |
| -2.69076 | -706.064981 | 0.61977  | -706.042178 | 3.93431  | -706.056156 |
| -2.58724 | -706.064826 | 0.72328  | -706.043281 | 4.03782  | -706.056216 |
| -2.48371 | -706.064649 | 0.82683  | -706.0443   | 4.14133  | -706.056267 |
| -2.38018 | -706.064446 | 0.9304   | -706.045249 | 4.24485  | -706.056311 |
| -2.27663 | -706.064212 | 1.03398  | -706.046133 | 4.34839  | -706.056349 |
| -2.17307 | -706.063943 | 1.13756  | -706.046959 | 4.45195  | -706.056381 |
| -2.0695  | -706.063634 | 1.24115  | -706.047731 | 4.55553  | -706.056409 |
| -1.96593 | -706.06328  | 1.34474  | -706.048452 | 4.65912  | -706.056431 |
| -1.86235 | -706.062875 | 1.44833  | -706.049126 | 4.76271  | -706.05645  |
| -1.75876 | -706.062414 | 1.55192  | -706.049754 | 4.86631  | -706.056463 |
| -1.65518 | -706.061891 | 1.65551  | -706.050341 |          |             |
| -1.55159 | -706.061301 | 1.75911  | -706.050888 |          |             |

TS1-5\_A2O-->P3+Ad\_Im2

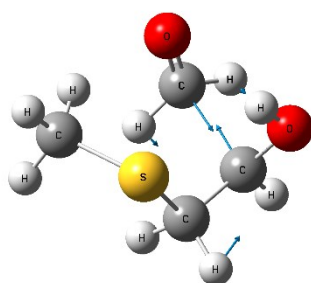

| Method                 | Ee          | E+ZPE       | $\Delta H$                     | $\Delta G$       |           |           |
|------------------------|-------------|-------------|--------------------------------|------------------|-----------|-----------|
| M06-2X/GD3/cc-pVTZ     | -706.37034  | -706.242963 | -706.232971                    | -706.277886      |           |           |
| M06-2X/DG3/aug-cc-pVTZ | -706.376379 | -706.24911  | -706.239087                    | -706.284185      |           |           |
| MN15/cc-pVTZ           | -706.046231 | -705.919438 | -705.90948                     | -705.954354      |           |           |
| MN15/aug-cc-pVTZ       | -706.056031 | -705.929449 | -705.919449                    | -705.964651      |           |           |
| Coordinates (xyz)      |             |             | Vibrations (cm <sup>-1</sup> ) |                  |           |           |
| C                      | -0.009993   | 0.006917    | 0.000658                       | <b>282.2994i</b> | 912.5461  | 1640.9549 |
| C                      | 0.001669    | -0.00748    | 2.143453                       | 51.6125          | 970.8248  | 2927.7847 |
| C                      | 1.437912    | -0.012733   | 2.5891                         | 77.8052          | 993.6654  | 3008.8372 |
| S                      | 2.285306    | -1.607796   | 2.427255                       | 172.8656         | 1013.202  | 3041.6078 |
| C                      | 3.051769    | -1.442447   | 0.79501                        | 177.8649         | 1107.1188 | 3073.0471 |
| H                      | 0.829281    | 0.724473    | -0.037404                      | 199.3255         | 1201.1518 | 3119.8583 |
| H                      | -1.014504   | 0.455877    | 0.015928                       | 209.7861         | 1206.8417 | 3158.1404 |
| H                      | 1.45749     | 0.215067    | 3.659395                       | 232.4311         | 1249.714  | 3161.9127 |
| H                      | 2.00918     | 0.76355     | 2.081883                       | 309.5805         | 1272.588  | 3180.6454 |
| H                      | 3.6436      | -2.343371   | 0.650933                       | 372.376          | 1353.4652 | 3695.4118 |
| H                      | 2.293586    | -1.376515   | 0.02026                        | 548.8457         | 1362.4752 |           |
| H                      | 3.715669    | -0.580516   | 0.788383                       | 574.0036         | 1441.8312 |           |
| O                      | 0.145757    | -1.167825   | -0.329433                      | 650.469          | 1451.5304 |           |
| H                      | -0.210001   | -1.872067   | 2.292779                       | 699.0651         | 1469.4885 |           |
| H                      | -0.542125   | 0.92199     | 2.278908                       | 748.0516         | 1480.0143 |           |
| O                      | -0.748778   | -1.075456   | 2.435763                       | 840.8366         | 1504.647  |           |

TS1-6\_Ad\_Im-O-->P4+Ad\_Im1

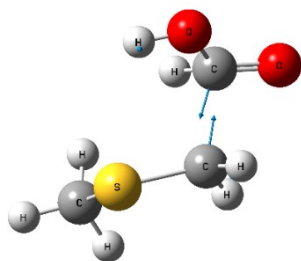

| Method                 | Ee          | E+ZPE       | $\Delta H$  | $\Delta G$                     |           |           |
|------------------------|-------------|-------------|-------------|--------------------------------|-----------|-----------|
| M06-2X/GD3/cc-pVTZ     | -667.080007 | -666.980836 | -666.972264 | -667.013821                    |           |           |
| M06-2X/DG3/aug-cc-pVTZ | -667.086317 | -666.987211 | -666.978645 | -667.020184                    |           |           |
| MN15/cc-pVTZ           | -666.788231 | -666.689722 | -666.681089 | -666.72272                     |           |           |
| MN15/aug-cc-pVTZ       | -666.797806 | -666.699372 | -666.69076  | -666.732325                    |           |           |
| SVECV-f12              | -666.961463 | -666.862357 | -666.853791 | -666.89533                     |           |           |
| Coordinates (xyz)      |             |             |             | Vibrations (cm <sup>-1</sup> ) |           |           |
| C                      | 0.010109    | 0.014367    | 0.03438     | <b>i434.9979</b>               | 945.123   | 2930.3824 |
| C                      | 0.007612    | -0.005261   | 1.931561    | 75.5042                        | 970.2699  | 3077.8913 |
| S                      | 1.634503    | 0.007276    | 2.550633    | 109.3797                       | 972.9906  | 3134.4113 |
| C                      | 2.001735    | 1.774999    | 2.473124    | 149.3814                       | 1067.4961 | 3162.9069 |
| H                      | -0.483428   | -0.957729   | 2.088424    | 194.8127                       | 1070.7467 | 3179.125  |
| H                      | -0.596027   | 0.860187    | 2.179113    | 290.1392                       | 1129.7539 | 3239.4575 |
| H                      | 3.005333    | 1.912464    | 2.866042    | 325.71                         | 1253.9563 | 3833.5001 |
| H                      | 1.968218    | 2.129118    | 1.445145    | 402.8092                       | 1347.5992 |           |
| H                      | 1.292534    | 2.328856    | 3.083024    | 443.2326                       | 1354.975  |           |
| H                      | 1.655246    | -0.983651   | -0.014037   | 619.3966                       | 1416.0904 |           |
| O                      | 0.746583    | -1.097701   | -0.315068   | 724.6573                       | 1474.0045 |           |
| H                      | 0.590797    | 0.949912    | -0.059079   | 764.946                        | 1480.9617 |           |
| O                      | -1.204035   | 0.013398    | -0.202187   | 802.7314                       | 1558.0857 |           |

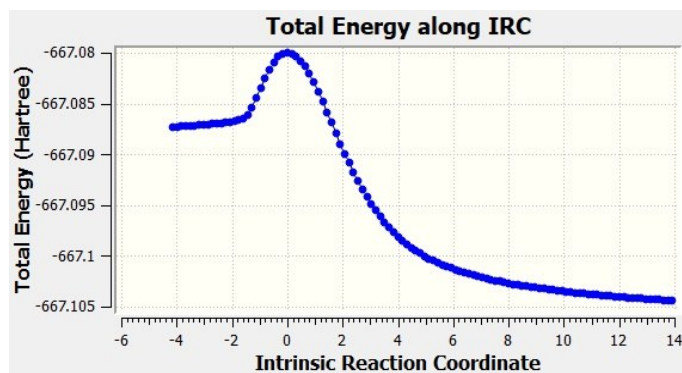

| Rx Coord | Energy         | Rx Coord | Energy      | Rx Coord | Energy      |
|----------|----------------|----------|-------------|----------|-------------|
| -4.14888 | -667.087318    | 1.92107  | -667.088956 | 8.00442  | -667.1027   |
| -3.98878 | -667.087295    | 2.08117  | -667.089936 | 8.16451  | -667.10278  |
| -3.82868 | -667.087269    | 2.24126  | -667.090875 | 8.32461  | -667.102856 |
| -3.66858 | -667.087242    | 2.40136  | -667.091769 | 8.48471  | -667.102929 |
| -3.50848 | -667.087213    | 2.56146  | -667.092618 | 8.64481  | -667.102999 |
| -3.34838 | -667.087182    | 2.72155  | -667.093418 | 8.80491  | -667.103067 |
| -3.18828 | -667.087148    | 2.88165  | -667.094168 | 8.96501  | -667.103131 |
| -3.02818 | -667.087111    | 3.04175  | -667.094868 | 9.12511  | -667.103194 |
| -2.86809 | -667.087072    | 3.20184  | -667.095518 | 9.28521  | -667.103254 |
| -2.708   | -667.08703     | 3.36193  | -667.09612  | 9.44531  | -667.103311 |
| -2.54791 | -667.086985    | 3.52202  | -667.096675 | 9.6054   | -667.103367 |
| -2.38786 | -667.086936    | 3.68211  | -667.097188 | 9.7655   | -667.103421 |
| -2.22789 | -667.086883    | 3.8422   | -667.097659 | 9.92559  | -667.103473 |
| -2.06827 | -667.086826    | 4.00228  | -667.098091 | 10.08569 | -667.103524 |
| -1.90953 | -667.086754    | 4.16236  | -667.098486 | 10.24578 | -667.103573 |
| -1.75122 | -667.086663    | 4.32244  | -667.098848 | 10.40588 | -667.103621 |
| -1.59818 | -667.086512    | 4.48252  | -667.09918  | 10.56598 | -667.103667 |
| -1.44053 | -667.086133    | 4.64259  | -667.099483 | 10.72607 | -667.103713 |
| -1.28064 | -667.085422    | 4.80267  | -667.099762 | 10.88617 | -667.103757 |
| -1.12059 | -667.084496    | 4.96274  | -667.100018 | 11.04627 | -667.1038   |
| -0.9605  | -667.083489    | 5.12281  | -667.100254 | 11.20637 | -667.103842 |
| -0.80042 | -667.08251     | 5.28289  | -667.100473 | 11.36646 | -667.103882 |
| -0.64033 | -667.081636    | 5.44297  | -667.100676 | 11.52656 | -667.103922 |
| -0.48025 | -667.080925    | 5.60305  | -667.100866 | 11.68665 | -667.10396  |
| -0.32017 | -667.080409    | 5.76314  | -667.101044 | 11.84674 | -667.103998 |
| -0.16011 | -667.080105    | 5.92323  | -667.101211 | 12.00684 | -667.104035 |
| <b>0</b> | <b>-667.08</b> | 6.08332  | -667.101368 | 12.16693 | -667.10407  |
| 0.16011  | -667.080101    | 6.24341  | -667.101515 | 12.32703 | -667.104105 |
| 0.32017  | -667.08037     | 6.4035   | -667.101654 | 12.48713 | -667.104139 |
| 0.48025  | -667.080803    | 6.56359  | -667.101785 | 12.64723 | -667.104172 |
| 0.64034  | -667.08138     | 6.72367  | -667.101909 | 12.80732 | -667.104203 |
| 0.80043  | -667.082089    | 6.88377  | -667.102026 | 12.96741 | -667.104234 |
| 0.96052  | -667.082909    | 7.04386  | -667.102137 | 13.1275  | -667.104264 |
| 1.12062  | -667.083825    | 7.20395  | -667.102242 | 13.28759 | -667.104292 |
| 1.28071  | -667.084814    | 7.36404  | -667.102342 | 13.44768 | -667.10432  |
| 1.4408   | -667.085848    | 7.52413  | -667.102438 | 13.60777 | -667.104346 |
| 1.60089  | -667.086899    | 7.68423  | -667.102529 | 13.76786 | -667.104371 |
| 1.76098  | -667.08794     | 7.84432  | -667.102616 | 13.92795 | -667.104395 |



TS1-7\_Ad\_Im2-->P5+MeS

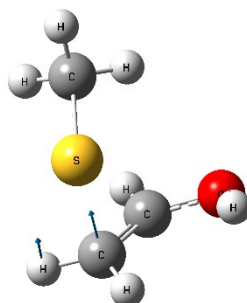

| Method                 | Ee          | E+ZPE       | $\Delta H$                     | $\Delta G$       |           |           |
|------------------------|-------------|-------------|--------------------------------|------------------|-----------|-----------|
| M06-2X/GD3/cc-pVTZ     | -591.855645 | -591.759874 | -591.751903                    | -591.792309      |           |           |
| M06-2X/DG3/aug-cc-pVTZ | -591.859895 | -591.764241 | -591.756225                    | -591.796875      |           |           |
| MN15/cc-pVTZ           | -591.610183 | -591.514923 | -591.506988                    | -591.547046      |           |           |
| MN15/aug-cc-pVTZ       | -591.61718  | -591.522118 | -591.514139                    | -591.554363      |           |           |
| SVECV-f12              | -591.742783 | -591.647129 | -591.639113                    | -591.679763      |           |           |
| Coordinates (xyz)      |             |             | Vibrations (cm <sup>-1</sup> ) |                  |           |           |
| C                      | 0.01555     | -0.021458   | -0.006817                      | <b>245.0066i</b> | 952.0016  | 3143.2245 |
| C                      | 0.030725    | -0.00269    | 1.347392                       | 50.1281          | 968.6993  | 3148.4032 |
| S                      | 2.413106    | -0.010992   | 1.814287                       | 83.0705          | 989.2049  | 3182.6439 |
| C                      | 2.896709    | 1.060356    | 0.443866                       | 135.2951         | 1146.6687 | 3223.7854 |
| H                      | -0.009087   | -0.925972   | 1.907893                       | 189.7146         | 1308.845  | 3281.9277 |
| H                      | -0.265657   | 0.899936    | 1.857388                       | 273.0476         | 1336.1882 | 3816.2429 |
| H                      | 3.977671    | 1.18051     | 0.504933                       | 486.2067         | 1363.7238 |           |
| H                      | 2.653758    | 0.611997    | -0.517613                      | 514.7682         | 1451.5608 |           |
| H                      | 2.434325    | 2.041577    | 0.526738                       | 731.5208         | 1464.6739 |           |
| H                      | 0.661573    | -1.795828   | -0.194675                      | 765.2948         | 1484.5594 |           |
| H                      | -0.162786   | 0.860877    | -0.60533                       | 889.5933         | 1616.7178 |           |
| O                      | 0.327622    | -1.088024   | -0.75966                       | 925.5004         | 3063.5416 |           |

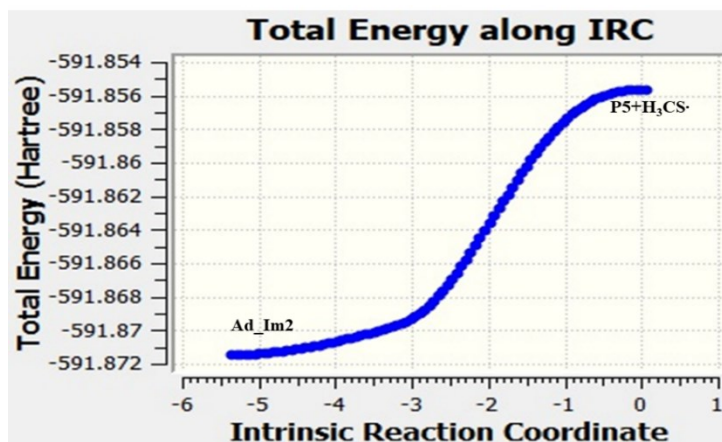

| Rx Coord | Energy      | Rx Coord | Energy      | Rx Coord | Energy           |
|----------|-------------|----------|-------------|----------|------------------|
| -5.35116 | -591.871513 | -3.48708 | -591.870122 | -1.62361 | -591.861055      |
| -5.29107 | -591.871504 | -3.42695 | -591.870047 | -1.56348 | -591.860646      |
| -5.23096 | -591.871492 | -3.36684 | -591.86997  | -1.50334 | -591.860249      |
| -5.17084 | -591.871477 | -3.30674 | -591.86989  | -1.44321 | -591.859863      |
| -5.11071 | -591.87146  | -3.24669 | -591.869807 | -1.38307 | -591.859491      |
| -5.05058 | -591.87144  | -3.18669 | -591.869717 | -1.32294 | -591.859135      |
| -4.99045 | -591.871418 | -3.1267  | -591.869616 | -1.2628  | -591.858794      |
| -4.93031 | -591.871392 | -3.06668 | -591.869498 | -1.20267 | -591.85847       |
| -4.87018 | -591.871365 | -3.00662 | -591.869359 | -1.14253 | -591.858163      |
| -4.81005 | -591.871335 | -2.94653 | -591.869195 | -1.0824  | -591.857875      |
| -4.74991 | -591.871302 | -2.88642 | -591.869004 | -1.02227 | -591.857605      |
| -4.68978 | -591.871267 | -2.82629 | -591.868786 | -0.96213 | -591.857354      |
| -4.62964 | -591.87123  | -2.76617 | -591.868542 | -0.902   | -591.857122      |
| -4.56951 | -591.87119  | -2.70604 | -591.868271 | -0.84186 | -591.856909      |
| -4.50937 | -591.871148 | -2.6459  | -591.867976 | -0.78173 | -591.856715      |
| -4.44924 | -591.871104 | -2.58577 | -591.867658 | -0.72159 | -591.856538      |
| -4.3891  | -591.871057 | -2.52564 | -591.867318 | -0.66146 | -591.85638       |
| -4.32897 | -591.871008 | -2.4655  | -591.86696  | -0.60133 | -591.856239      |
| -4.26883 | -591.870957 | -2.40537 | -591.866585 | -0.54119 | -591.856116      |
| -4.2087  | -591.870904 | -2.34523 | -591.866196 | -0.48106 | -591.856008      |
| -4.14856 | -591.870849 | -2.2851  | -591.865793 | -0.42093 | -591.855916      |
| -4.08843 | -591.870792 | -2.22496 | -591.865379 | -0.36079 | -591.85584       |
| -4.02829 | -591.870733 | -2.16483 | -591.864957 | -0.30066 | -591.855777      |
| -3.96816 | -591.870672 | -2.10469 | -591.864527 | -0.24053 | -591.855727      |
| -3.90802 | -591.870609 | -2.04456 | -591.864091 | -0.1804  | -591.85569       |
| -3.84788 | -591.870544 | -1.98442 | -591.863652 | -0.12027 | -591.855665      |
| -3.78775 | -591.870478 | -1.92429 | -591.863211 | -0.06014 | -591.855651      |
| -3.72761 | -591.87041  | -1.86415 | -591.862771 | <b>0</b> | <b>-591.8556</b> |
| -3.66748 | -591.87034  | -1.80402 | -591.862333 | 0.06014  | -591.85565       |
| -3.60734 | -591.870269 | -1.74388 | -591.8619   |          |                  |
| -3.54721 | -591.870196 | -1.68375 | -591.861474 |          |                  |

TS1-8\_Ad\_Im2-->P3\_Im+Ad\_Im1

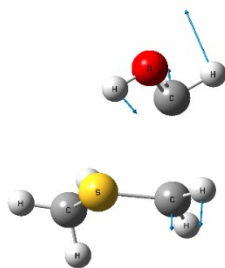

| Method                 | Ee          | E+ZPE       | $\Delta H$                     | $\Delta G$       |           |           |
|------------------------|-------------|-------------|--------------------------------|------------------|-----------|-----------|
| M06-2X/GD3/cc-pVTZ     | -591.762086 | -591.670989 | -591.662217                    | -591.703451      |           |           |
| M06-2X/DG3/aug-cc-pVTZ | -591.766159 | -591.675141 | -591.666342                    | -591.707652      |           |           |
| MN15/cc-pVTZ           | -591.521081 | -591.43028  | -591.421535                    | -591.462628      |           |           |
| MN15/aug-cc-pVTZ       | -591.528077 | -591.437378 | -591.428614                    | -591.469788      |           |           |
| SVECV-f12              | -591.652387 | -591.561369 | -591.55257                     | -591.59388       |           |           |
| Coordinates (xyz)      |             |             | Vibrations (cm <sup>-1</sup> ) |                  |           |           |
| C                      | -0.04113    | -0.034755   | 0.006297                       | <b>220.2568i</b> | 907.8265  | 3071.2249 |
| C                      | 0.01211     | 0.016973    | 2.773602                       | 95.0518          | 980.8543  | 3161.7879 |
| S                      | 1.72945     | 0.008351    | 2.768298                       | 133.387          | 1033.9813 | 3177.8548 |
| C                      | 2.037503    | 1.695624    | 2.198698                       | 150.0742         | 1066.5682 | 3179.5934 |
| H                      | -0.479842   | -0.898327   | 3.061477                       | 189.6349         | 1248.0512 | 3304.3429 |
| H                      | -0.512508   | 0.956843    | 2.826934                       | 211.9487         | 1340.705  | 3587.3616 |
| H                      | 3.108868    | 1.805332    | 2.055208                       | 290.3568         | 1362.3621 |           |
| H                      | 1.504167    | 1.840226    | 1.261227                       | 308.0135         | 1408.8861 |           |
| H                      | 1.695911    | 2.402614    | 2.95107                        | 328.3298         | 1468.6781 |           |
| H                      | 1.48262     | -0.961701   | 0.521963                       | 484.343          | 1489.1125 |           |
| H                      | -0.952283   | -0.31992    | -0.559101                      | 725.9304         | 1496.053  |           |
| O                      | 0.694267    | -1.107792   | -0.034972                      | 837.608          | 2912.3602 |           |

TS\_P3\_P3\_Im2->P3

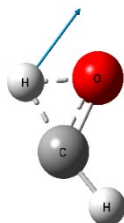

| Method                 | Ee          | E+ZPE       | $\Delta H$                     | $\Delta G$                 |
|------------------------|-------------|-------------|--------------------------------|----------------------------|
| M06-2X/GD3/cc-pVTZ     | -114.358842 | -114.337882 | -114.333985                    | -114.359609                |
| M06-2X/DG3/aug-cc-pVTZ | -114.361808 | -114.340928 | -114.337024                    | -114.362656                |
| MN15/cc-pVTZ           | -114.282761 | -114.261904 | -114.25801                     | -114.283634                |
| MN15/aug-cc-pVTZ       | -114.28612  | -114.265344 | -114.261443                    | -114.287075                |
| SVECV-f12              | -114.34922  | -114.328341 | -114.324437                    | -114.350069                |
| Coordinates (xyz)      |             |             | Vibrations (cm <sup>-1</sup> ) |                            |
| H                      | -0.176906   | -0.002154   | 0.371716                       | <b>2162.1125i</b> 2663.468 |
| C                      | 0.116944    | -0.0195     | 1.585923                       | 699.9808 2956.2586         |
| H                      | 0.564728    | -0.024115   | 2.598579                       | 1345.9434                  |
| O                      | 0.965769    | 0.045769    | 0.619757                       | 1499.4818                  |

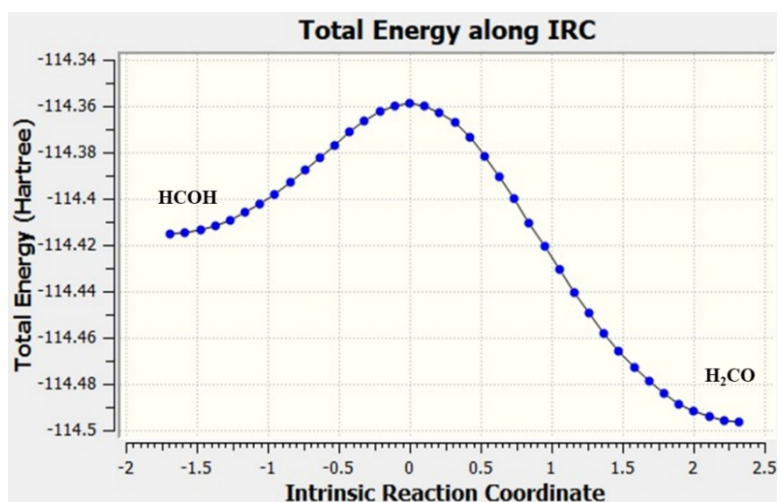

| Rx Coord | Energy      | Rx Coord | Energy      | Rx Coord | Energy      |
|----------|-------------|----------|-------------|----------|-------------|
| -1.68687 | -114.415023 | -0.31634 | -114.366509 | 1.05448  | -114.430751 |
| -1.58152 | -114.414526 | -0.2109  | -114.362497 | 1.15993  | -114.440445 |
| -1.47611 | -114.413382 | -0.10547 | -114.359801 | 1.26538  | -114.449613 |
| -1.37071 | -114.411591 | 0        | -114.3588   | 1.37082  | -114.458138 |
| -1.26529 | -114.409138 | 0.10547  | -114.359818 | 1.47627  | -114.465926 |
| -1.15987 | -114.406034 | 0.21091  | -114.362675 | 1.58171  | -114.472907 |
| -1.05443 | -114.402293 | 0.31635  | -114.367311 | 1.68715  | -114.47903  |
| -0.94899 | -114.397959 | 0.42179  | -114.37364  | 1.79259  | -114.484259 |
| -0.84354 | -114.393107 | 0.52724  | -114.381484 | 1.89803  | -114.488565 |
| -0.73809 | -114.38785  | 0.63269  | -114.390499 | 2.00346  | -114.491939 |
| -0.63265 | -114.382339 | 0.73814  | -114.400278 | 2.10888  | -114.494378 |
| -0.52721 | -114.376773 | 0.84359  | -114.410443 | 2.21422  | -114.495906 |
| -0.42178 | -114.371392 | 0.94903  | -114.420685 | 2.31906  | -114.49657  |

2. Reactions of the peroxy radicals (A1O2, A2O2) with NO<sub>2</sub>

| TSnox_A2O2-NO <sub>2</sub> -->P4+P5                                               |             |           |           |                                |             |             |
|-----------------------------------------------------------------------------------|-------------|-----------|-----------|--------------------------------|-------------|-------------|
| 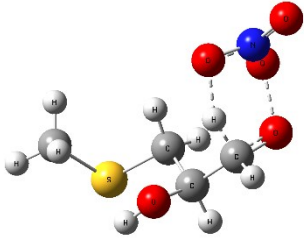 |             |           |           |                                |             |             |
| Method                                                                            | Ee          |           |           | E+ZPE                          | ΔH          | ΔG          |
| M06-2X/GD3/cc-pVTZ                                                                | -986.598769 |           |           | -986.454112                    | -986.441133 | -986.494144 |
| M06-2X/DG3/aug-cc-pVTZ                                                            | -986.609214 |           |           | -986.464811                    | -986.451782 | -986.504998 |
| MN15/cc-pVTZ                                                                      | -986.103342 |           |           | -985.959756                    | -985.946634 | -985.999839 |
| MN15/aug-cc-pVTZ                                                                  | -986.118334 |           |           | -985.975065                    | -985.96189  | -986.015318 |
| Coordinates (xyz)                                                                 |             |           |           | Vibrations (cm <sup>-1</sup> ) |             |             |
| C                                                                                 | 0.366733    | 0.317411  | 0.026104  | <b>1311.8239i</b>              | 767.2092    | 1437.5802   |
| C                                                                                 | 0.063071    | -0.052805 | 1.470228  | 40.5896                        | 820.5131    | 1461.4621   |
| C                                                                                 | 1.300853    | 0.091249  | 2.349368  | 50.4916                        | 847.904     | 1473.5817   |
| S                                                                                 | 1.003581    | -0.541121 | 4.027494  | 70.7438                        | 856.5276    | 1495.4044   |
| C                                                                                 | 1.777328    | -2.174339 | 3.883582  | 87.2813                        | 910.942     | 1659.2399   |
| H                                                                                 | 1.171097    | -0.505787 | -0.3586   | 108.4441                       | 975.7821    | 1792.2491   |
| H                                                                                 | -0.719918   | 0.615928  | 1.846179  | 115.7491                       | 981.9923    | 3018.7931   |
| H                                                                                 | 1.583216    | 1.139639  | 2.422977  | 159.9552                       | 1027.7306   | 3028.512    |
| H                                                                                 | 2.140426    | -0.455708 | 1.920208  | 193.8636                       | 1058.2966   | 3076.4957   |
| H                                                                                 | 1.594252    | -2.693969 | 4.820771  | 245.8369                       | 1099.0461   | 3089.8863   |
| H                                                                                 | 1.34576     | -2.7417   | 3.062883  | 289.6219                       | 1142.0503   | 3150.0792   |
| H                                                                                 | 2.849579    | -2.06859  | 3.737185  | 409.6294                       | 1188.9587   | 3162.0882   |
| O                                                                                 | -0.413379   | -1.37715  | 1.411771  | 430.7763                       | 1220.4644   | 3172.4257   |
| H                                                                                 | -0.674203   | -1.627832 | 2.305675  | 458.0517                       | 1244.9303   | 3818.3127   |
| H                                                                                 | -0.406464   | 0.095939  | -0.723189 | 472.6112                       | 1266.7971   | 283.238661  |
| O                                                                                 | 0.945877    | 1.471337  | -0.195682 | 506.6416                       | 1279.8258   | 1115.54725  |
| O                                                                                 | 2.687773    | 1.317111  | -0.325209 | 585.0992                       | 1356.7075   |             |
| N                                                                                 | 2.843612    | 0.392869  | -1.223101 | 685.6267                       | 1379.9774   |             |
| O                                                                                 | 3.17553     | 0.656162  | -2.339542 | 696.705                        | 1384.1272   |             |
| O                                                                                 | 2.535962    | -0.756661 | -0.821688 | 727.0856                       | 1404.7512   |             |

**A1O2-NO<sub>2</sub>-PW**

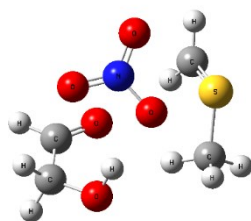

| <b>Method</b>            |          |          |          |         |          |           | <b>Ee</b>                           |           |          | <b>E+ZPE</b> |         |          | <b><math>\Delta</math>H</b> |   |          | <b><math>\Delta</math>G</b> |          |         |        |           |   |          |           |          |        |          |           |   |          |          |          |          |          |           |   |           |          |           |          |         |           |   |           |           |           |          |          |          |   |          |           |          |        |          |           |   |         |          |         |          |           |           |   |          |          |          |          |           |           |   |          |          |          |          |           |          |   |          |          |          |          |          |           |   |          |           |          |          |           |           |   |          |           |           |          |          |          |   |           |          |          |          |           |  |   |          |          |          |          |          |  |   |          |           |          |          |           |  |   |         |           |          |          |           |  |   |          |           |          |          |           |  |   |          |           |          |          |           |  |
|--------------------------|----------|----------|----------|---------|----------|-----------|-------------------------------------|-----------|----------|--------------|---------|----------|-----------------------------|---|----------|-----------------------------|----------|---------|--------|-----------|---|----------|-----------|----------|--------|----------|-----------|---|----------|----------|----------|----------|----------|-----------|---|-----------|----------|-----------|----------|---------|-----------|---|-----------|-----------|-----------|----------|----------|----------|---|----------|-----------|----------|--------|----------|-----------|---|---------|----------|---------|----------|-----------|-----------|---|----------|----------|----------|----------|-----------|-----------|---|----------|----------|----------|----------|-----------|----------|---|----------|----------|----------|----------|----------|-----------|---|----------|-----------|----------|----------|-----------|-----------|---|----------|-----------|-----------|----------|----------|----------|---|-----------|----------|----------|----------|-----------|--|---|----------|----------|----------|----------|----------|--|---|----------|-----------|----------|----------|-----------|--|---|---------|-----------|----------|----------|-----------|--|---|----------|-----------|----------|----------|-----------|--|---|----------|-----------|----------|----------|-----------|--|
| M06-2X/GD3/cc-pVTZ       |          |          |          |         |          |           | -986.691867                         |           |          | -986.545696  |         |          | -986.530853                 |   |          | -986.586895                 |          |         |        |           |   |          |           |          |        |          |           |   |          |          |          |          |          |           |   |           |          |           |          |         |           |   |           |           |           |          |          |          |   |          |           |          |        |          |           |   |         |          |         |          |           |           |   |          |          |          |          |           |           |   |          |          |          |          |           |          |   |          |          |          |          |          |           |   |          |           |          |          |           |           |   |          |           |           |          |          |          |   |           |          |          |          |           |  |   |          |          |          |          |          |  |   |          |           |          |          |           |  |   |         |           |          |          |           |  |   |          |           |          |          |           |  |   |          |           |          |          |           |  |
| M06-2X/DG3/aug-cc-pVTZ   |          |          |          |         |          |           | -986.702874                         |           |          | -986.556981  |         |          | -986.54206                  |   |          | -986.598462                 |          |         |        |           |   |          |           |          |        |          |           |   |          |          |          |          |          |           |   |           |          |           |          |         |           |   |           |           |           |          |          |          |   |          |           |          |        |          |           |   |         |          |         |          |           |           |   |          |          |          |          |           |           |   |          |          |          |          |           |          |   |          |          |          |          |          |           |   |          |           |          |          |           |           |   |          |           |           |          |          |          |   |           |          |          |          |           |  |   |          |          |          |          |          |  |   |          |           |          |          |           |  |   |         |           |          |          |           |  |   |          |           |          |          |           |  |   |          |           |          |          |           |  |
| MN15/cc-pVTZ             |          |          |          |         |          |           | -986.190583                         |           |          | -986.045448  |         |          | -986.030412                 |   |          | -986.087109                 |          |         |        |           |   |          |           |          |        |          |           |   |          |          |          |          |          |           |   |           |          |           |          |         |           |   |           |           |           |          |          |          |   |          |           |          |        |          |           |   |         |          |         |          |           |           |   |          |          |          |          |           |           |   |          |          |          |          |           |          |   |          |          |          |          |          |           |   |          |           |          |          |           |           |   |          |           |           |          |          |          |   |           |          |          |          |           |  |   |          |          |          |          |          |  |   |          |           |          |          |           |  |   |         |           |          |          |           |  |   |          |           |          |          |           |  |   |          |           |          |          |           |  |
| MN15/aug-cc-pVTZ         |          |          |          |         |          |           | -986.206428                         |           |          | -986.061634  |         |          | -986.046537                 |   |          | -986.103513                 |          |         |        |           |   |          |           |          |        |          |           |   |          |          |          |          |          |           |   |           |          |           |          |         |           |   |           |           |           |          |          |          |   |          |           |          |        |          |           |   |         |          |         |          |           |           |   |          |          |          |          |           |           |   |          |          |          |          |           |          |   |          |          |          |          |          |           |   |          |           |          |          |           |           |   |          |           |           |          |          |          |   |           |          |          |          |           |  |   |          |          |          |          |          |  |   |          |           |          |          |           |  |   |         |           |          |          |           |  |   |          |           |          |          |           |  |   |          |           |          |          |           |  |
| <b>Coordinates (xyz)</b> |          |          |          |         |          |           | <b>Vibrations (cm<sup>-1</sup>)</b> |           |          |              |         |          |                             |   |          |                             |          |         |        |           |   |          |           |          |        |          |           |   |          |          |          |          |          |           |   |           |          |           |          |         |           |   |           |           |           |          |          |          |   |          |           |          |        |          |           |   |         |          |         |          |           |           |   |          |          |          |          |           |           |   |          |          |          |          |           |          |   |          |          |          |          |          |           |   |          |           |          |          |           |           |   |          |           |           |          |          |          |   |           |          |          |          |           |  |   |          |          |          |          |          |  |   |          |           |          |          |           |  |   |         |           |          |          |           |  |   |          |           |          |          |           |  |   |          |           |          |          |           |  |
| C                        | 0.093472 | 0.010928 | 0.083329 | 44.9942 | 735.5701 | 1460.5452 | C                                   | -0.181714 | 0.285933 | 1.534651     | 71.3202 | 742.1799 | 1466.1513                   | C | 2.858320 | -0.173672                   | 4.244091 | 79.1798 | 776.99 | 1475.6736 | S | 3.870489 | -0.679014 | 3.121014 | 92.232 | 871.4538 | 1591.4673 | C | 3.857332 | 0.605622 | 1.864279 | 119.9503 | 882.5214 | 1844.6528 | H | -0.389536 | 0.810118 | -0.489766 | 125.1507 | 928.461 | 2973.9151 | H | -0.427797 | -0.920918 | -0.164932 | 138.2382 | 930.9546 | 3035.617 | H | 2.765896 | -0.794321 | 5.123913 | 149.32 | 995.7424 | 3067.8884 | H | 2.18794 | 0.658652 | 4.08338 | 174.0439 | 1045.3487 | 3084.4758 | H | 4.242944 | 0.145357 | 0.959545 | 187.8305 | 1092.2877 | 3174.2508 | H | 2.828408 | 0.923294 | 1.712067 | 203.0951 | 1102.7933 | 3192.447 | H | 4.506317 | 1.409501 | 2.200788 | 217.7011 | 1123.553 | 3197.0384 | H | 1.848724 | -0.773753 | 0.221107 | 227.5914 | 1182.9439 | 3292.7283 | O | 1.445196 | -0.017379 | -0.240184 | 252.8896 | 1263.991 | 3633.899 | H | -1.247468 | 0.245816 | 1.824687 | 301.5457 | 1348.1141 |  | O | 0.663676 | 0.545223 | 2.353359 | 344.2071 | 1376.797 |  | O | 2.733272 | -1.867794 | 1.476543 | 621.7213 | 1400.4132 |  | N | 1.75938 | -2.462249 | 2.084201 | 640.6975 | 1414.2832 |  | O | 1.960709 | -2.918922 | 3.198881 | 715.9417 | 1449.8274 |  | O | 0.679736 | -2.514352 | 1.513474 | 722.5586 | 1454.3759 |  |

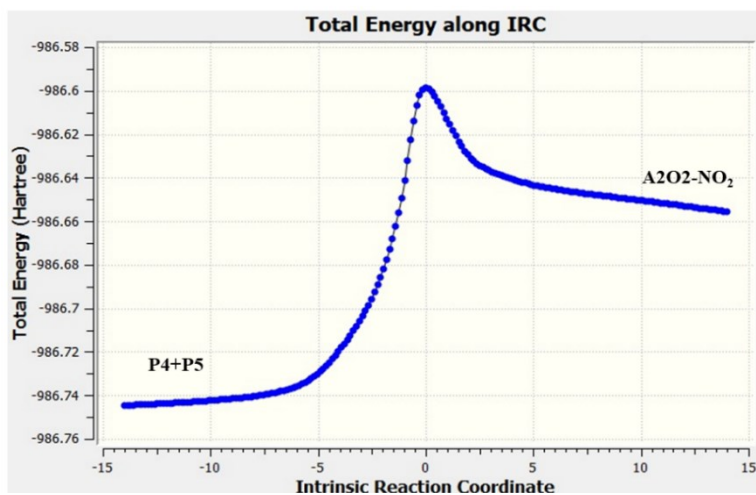

| Rx Coord  | Energy      | Rx Coord | Energy      | Rx Coord | Energy      |
|-----------|-------------|----------|-------------|----------|-------------|
| -14.00359 | -986.744706 | -4.61953 | -986.726361 | 4.75996  | -986.642802 |
| -13.86352 | -986.744634 | -4.47946 | -986.724844 | 4.90003  | -986.64313  |
| -13.72344 | -986.744562 | -4.33945 | -986.72325  | 5.04009  | -986.643443 |
| -13.58337 | -986.744491 | -4.19938 | -986.721576 | 5.18015  | -986.643742 |
| -13.4433  | -986.744419 | -4.05937 | -986.71985  | 5.32021  | -986.644028 |
| -13.30323 | -986.744347 | -3.91931 | -986.71806  | 5.46027  | -986.644302 |
| -13.16316 | -986.744274 | -3.7793  | -986.716222 | 5.60033  | -986.644564 |
| -13.02308 | -986.744202 | -3.63927 | -986.714333 | 5.74039  | -986.644816 |
| -12.88301 | -986.744128 | -3.49926 | -986.712393 | 5.88045  | -986.645059 |
| -12.74294 | -986.744054 | -3.35923 | -986.710381 | 6.02051  | -986.645293 |
| -12.60286 | -986.74398  | -3.2192  | -986.708282 | 6.16057  | -986.645519 |
| -12.46279 | -986.743905 | -3.07917 | -986.706074 | 6.30063  | -986.645739 |
| -12.32272 | -986.743829 | -2.93913 | -986.703738 | 6.4407   | -986.645951 |
| -12.18264 | -986.743752 | -2.79909 | -986.701252 | 6.58076  | -986.646158 |
| -12.04257 | -986.743675 | -2.65905 | -986.698594 | 6.72082  | -986.646359 |
| -11.9025  | -986.743596 | -2.51901 | -986.695742 | 6.86089  | -986.646555 |
| -11.76242 | -986.743516 | -2.37896 | -986.692672 | 7.00095  | -986.646747 |
| -11.62235 | -986.743435 | -2.23893 | -986.689358 | 7.14102  | -986.646935 |
| -11.48228 | -986.743352 | -2.09889 | -986.685771 | 7.28109  | -986.647119 |
| -11.34221 | -986.743268 | -1.95887 | -986.681874 | 7.42116  | -986.6473   |
| -11.20213 | -986.743183 | -1.81887 | -986.677631 | 7.56122  | -986.647479 |
| -11.06206 | -986.743096 | -1.67887 | -986.672993 | 7.70129  | -986.647656 |
| -10.92199 | -986.743008 | -1.53888 | -986.667912 | 7.84136  | -986.64783  |
| -10.78192 | -986.742919 | -1.39891 | -986.66233  | 7.98144  | -986.648003 |
| -10.64185 | -986.742827 | -1.25903 | -986.656192 | 8.12151  | -986.648175 |



|           |             |          |             |          |             |
|-----------|-------------|----------|-------------|----------|-------------|
| -10.50178 | -986.742734 | -1.11947 | -986.649286 | 8.26158  | -986.648346 |
| -10.36171 | -986.742639 | -0.9799  | -986.641295 | 8.40165  | -986.648516 |
| -10.22164 | -986.742541 | -0.84002 | -986.632094 | 8.54172  | -986.648686 |
| -10.08157 | -986.742441 | -0.69999 | -986.622566 | 8.6818   | -986.648855 |
| -9.9415   | -986.742339 | -0.55992 | -986.613919 | 8.82187  | -986.649023 |
| -9.80144  | -986.742234 | -0.41985 | -986.607006 | 8.96195  | -986.649192 |
| -9.66137  | -986.742125 | -0.2798  | -986.602164 | 9.10202  | -986.649361 |
| -9.52131  | -986.742013 | -0.13984 | -986.599515 | 9.2421   | -986.64953  |
| -9.38125  | -986.741896 | 0        | -986.5988   | 9.38217  | -986.649699 |
| -9.24118  | -986.741776 | 0.13972  | -986.599318 | 9.52225  | -986.649869 |
| -9.10112  | -986.74165  | 0.27946  | -986.600666 | 9.66233  | -986.650039 |
| -8.96105  | -986.74152  | 0.4195   | -986.602603 | 9.8024   | -986.65021  |
| -8.82099  | -986.741384 | 0.55951  | -986.604888 | 9.94248  | -986.650382 |
| -8.68092  | -986.741243 | 0.69955  | -986.607426 | 10.08255 | -986.650554 |
| -8.54085  | -986.741096 | 0.8396   | -986.610106 | 10.22263 | -986.650728 |
| -8.40078  | -986.740943 | 0.97966  | -986.612855 | 10.36271 | -986.650902 |
| -8.26071  | -986.740783 | 1.11972  | -986.615605 | 10.50279 | -986.651077 |
| -8.12064  | -986.740616 | 1.25978  | -986.6183   | 10.64286 | -986.651253 |
| -7.98058  | -986.740441 | 1.39984  | -986.620891 | 10.78294 | -986.65143  |
| -7.84052  | -986.740256 | 1.5399   | -986.623337 | 10.92302 | -986.651608 |
| -7.70046  | -986.740059 | 1.67996  | -986.625599 | 11.0631  | -986.651786 |
| -7.56041  | -986.739848 | 1.82     | -986.627648 | 11.20317 | -986.651966 |
| -7.42036  | -986.739621 | 1.96002  | -986.62946  | 11.34325 | -986.652146 |
| -7.2803   | -986.739375 | 2.09999  | -986.631024 | 11.48333 | -986.652326 |
| -7.14024  | -986.739108 | 2.23988  | -986.632345 | 11.62341 | -986.652508 |
| -7.00018  | -986.738819 | 2.37966  | -986.633454 | 11.76349 | -986.652689 |
| -6.86011  | -986.738506 | 2.51944  | -986.634399 | 11.90357 | -986.652872 |
| -6.72005  | -986.738168 | 2.65929  | -986.635229 | 12.04365 | -986.653055 |
| -6.57999  | -986.737802 | 2.79923  | -986.635977 | 12.18373 | -986.653239 |
| -6.43993  | -986.737408 | 2.93923  | -986.636666 | 12.32381 | -986.653423 |
| -6.29987  | -986.736979 | 3.07925  | -986.637308 | 12.46389 | -986.653607 |
| -6.15983  | -986.73651  | 3.2193   | -986.63791  | 12.60396 | -986.653792 |
| -6.01979  | -986.735993 | 3.35934  | -986.638477 | 12.74404 | -986.653977 |
| -5.87977  | -986.735417 | 3.49939  | -986.639013 | 12.88412 | -986.654161 |
| -5.73975  | -986.734777 | 3.63945  | -986.639521 | 13.0242  | -986.654346 |
| -5.59973  | -986.734061 | 3.77951  | -986.640004 | 13.16428 | -986.65453  |
| -5.45972  | -986.733265 | 3.91957  | -986.640463 | 13.30436 | -986.654714 |
| -5.31969  | -986.732371 | 4.05963  | -986.640901 | 13.44444 | -986.654897 |
| -5.17967  | -986.731386 | 4.1997   | -986.641319 | 13.58452 | -986.65508  |
| -5.03963  | -986.730286 | 4.33977  | -986.641717 | 13.7246  | -986.655263 |
| -4.89961  | -986.729086 | 4.47983  | -986.642096 | 13.86468 | -986.655444 |
| -4.75955  | -986.727771 | 4.6199   | -986.642457 | 14.00476 | -986.655625 |

3. Intramolecular rearrangement mechanism in RO<sub>2</sub> intermediates (A1O2-A2O2)

| TS2-1-A1_Im1-->A1_Im1_1                                                           |                |           |             |                                |             |           |
|-----------------------------------------------------------------------------------|----------------|-----------|-------------|--------------------------------|-------------|-----------|
| 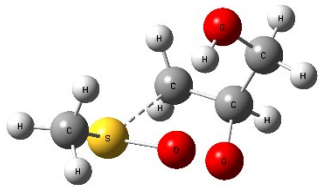 |                |           |             |                                |             |           |
| Method                                                                            | E <sub>c</sub> |           | E+ZPE       | ΔH                             | ΔG          |           |
| M06-2X/GD3/cc-pVTZ                                                                | -781.484483    |           | -781.350927 | -781.340944                    | -781.385921 |           |
| M06-2X/DG3/aug-cc-pVTZ                                                            | -781.492081    |           | -781.358634 | -781.348644                    | -781.393598 |           |
| MN15/cc-pVTZ                                                                      | -781.115151    |           | -780.982249 | -780.972219                    | -781.017264 |           |
| MN15/aug-cc-pVTZ                                                                  | -781.127202    |           | -780.994529 | -780.984481                    | -781.029539 |           |
| Coordinates (xyz)                                                                 |                |           |             | Vibrations (cm <sup>-1</sup> ) |             |           |
| C                                                                                 | -0.025151      | 0.061749  | -0.008075   | <b>283.2242i</b>               | 878.2876    | 1471.9089 |
| C                                                                                 | -0.000958      | -0.000554 | 1.511549    | 56.1622                        | 922.967     | 1499.4977 |
| C                                                                                 | 1.366082       | 0.012518  | 2.098971    | 87.1392                        | 944.3168    | 3043.9959 |
| S                                                                                 | 1.56415        | -2.21532  | 2.604931    | 144.0541                       | 954.5332    | 3064.8851 |
| C                                                                                 | 2.034058       | -3.80359  | 1.845576    | 189.9149                       | 993.1797    | 3070.7022 |
| H                                                                                 | 0.265111       | 1.065907  | -0.319082   | 241.8463                       | 1016.2373   | 3110.7987 |
| H                                                                                 | -1.050528      | -0.1191   | -0.345143   | 277.5077                       | 1044.6566   | 3158.0532 |
| H                                                                                 | 1.47534        | 0.40402   | 3.102118    | 286.3521                       | 1122.0725   | 3166.9548 |
| H                                                                                 | 2.197277       | 0.17923   | 1.429427    | 383.306                        | 1164.5886   | 3173.1242 |
| H                                                                                 | 2.962897       | -4.095793 | 2.3301      | 447.0348                       | 1239.378    | 3257.8666 |
| H                                                                                 | 1.259039       | -4.543464 | 2.032925    | 455.2148                       | 1310.2242   | 3852.3041 |
| H                                                                                 | 2.199284       | -3.677291 | 0.778428    | 537.4686                       | 1321.9877   |           |
| O                                                                                 | 0.879534       | -0.827217 | -0.626835   | 626.4706                       | 1352.8393   |           |
| H                                                                                 | 0.666742       | -1.713076 | -0.317214   | 684.7803                       | 1393.5132   |           |
| H                                                                                 | -0.633083      | 0.798786  | 1.908992    | 686.1972                       | 1436.6506   |           |
| O                                                                                 | -0.696611      | -1.17776  | 1.994665    | 770.937                        | 1455.1229   |           |
| O                                                                                 | 0.099888       | -2.289036 | 1.680829    | 818.1631                       | 1463.0627   |           |

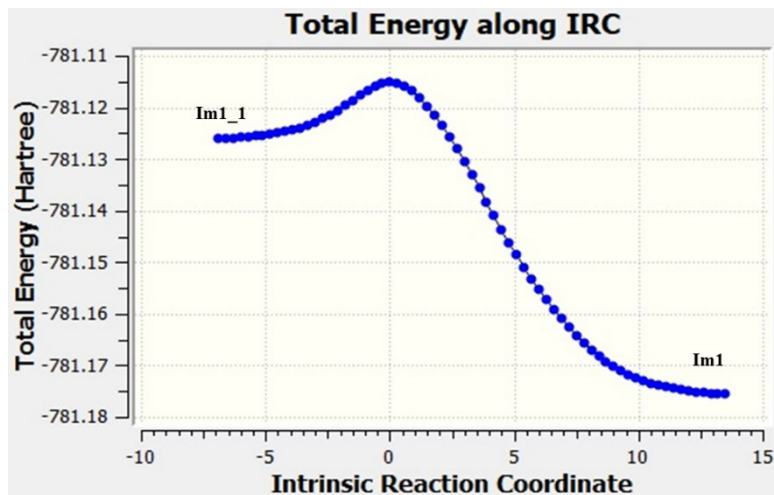

| Rx Coord | Energy      | Rx Coord | Energy           | Rx Coord | Energy      |
|----------|-------------|----------|------------------|----------|-------------|
| -6.9004  | -781.125985 | <b>0</b> | <b>-781.1151</b> | 6.89979  | -781.160992 |
| -6.60081 | -781.125939 | 0.29294  | -781.115282      | 7.2002   | -781.162666 |
| -6.30199 | -781.125885 | 0.59305  | -781.115874      | 7.5006   | -781.164225 |
| -6.00329 | -781.125815 | 0.89339  | -781.116877      | 7.801    | -781.165664 |
| -5.70379 | -781.125722 | 1.19367  | -781.118219      | 8.10139  | -781.166986 |
| -5.4038  | -781.125597 | 1.49392  | -781.119826      | 8.40177  | -781.168185 |
| -5.10361 | -781.125437 | 1.7941   | -781.121628      | 8.70214  | -781.169264 |
| -4.80334 | -781.125235 | 2.09421  | -781.123597      | 9.0025   | -781.170223 |
| -4.5031  | -781.124989 | 2.39435  | -781.125721      | 9.30282  | -781.171068 |
| -4.20286 | -781.124692 | 2.69453  | -781.128011      | 9.60312  | -781.171804 |
| -3.90265 | -781.124338 | 2.9948   | -781.130455      | 9.90339  | -781.172441 |
| -3.60242 | -781.123918 | 3.29511  | -781.133026      | 10.20359 | -781.172989 |
| -3.30217 | -781.123423 | 3.59546  | -781.135677      | 10.50379 | -781.173461 |
| -3.00188 | -781.122843 | 3.89582  | -781.138357      | 10.80388 | -781.173864 |
| -2.70157 | -781.122174 | 4.19619  | -781.141019      | 11.10404 | -781.174215 |
| -2.40122 | -781.121413 | 4.49657  | -781.14363       | 11.40407 | -781.174513 |
| -2.10087 | -781.120564 | 4.79696  | -781.146161      | 11.70408 | -781.174775 |
| -1.8005  | -781.119639 | 5.09736  | -781.1486        | 12.00406 | -781.174988 |
| -1.50013 | -781.118664 | 5.39776  | -781.150936      | 12.30365 | -781.175165 |
| -1.19975 | -781.117677 | 5.69816  | -781.153167      | 12.60335 | -781.175301 |
| -0.89939 | -781.116742 | 5.99857  | -781.155289      | 12.90269 | -781.175404 |
| -0.59902 | -781.115936 | 6.29898  | -781.157302      | 13.20222 | -781.175479 |
| -0.29891 | -781.115363 | 6.59938  | -781.159204      | 13.50187 | -781.175533 |

TS2-2-A1\_Im1-->A1\_Im1\_2

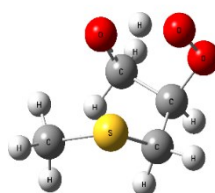

| Method                 |           | Ee          | E+ZPE                          | $\Delta H$        | $\Delta G$  |           |
|------------------------|-----------|-------------|--------------------------------|-------------------|-------------|-----------|
| M06-2X/GD3/cc-pVTZ     |           | -781.504877 | -781.374753                    | -781.365243       | -781.408706 |           |
| M06-2X/DG3/aug-cc-pVTZ |           | -781.511182 | -781.381206                    | -781.371676       | -781.41519  |           |
| MN15/cc-pVTZ           |           | -781.139175 | -781.009853                    | -781.000271       | -781.043863 |           |
| MN15/aug-cc-pVTZ       |           | -781.149665 | -781.020623                    | -781.011001       | -781.054704 |           |
| Coordinates (xyz)      |           |             | Vibrations (cm <sup>-1</sup> ) |                   |             |           |
| C                      | -0.014627 | -0.000537   | -0.014787                      | <b>1241.7664i</b> | 903.6886    | 1499.6131 |
| C                      | 0.006557  | -0.006901   | 1.589853                       | 99.6435           | 948.5954    | 1521.8175 |
| C                      | 1.422727  | 0.013674    | 2.174171                       | 141.0975          | 957.4216    | 1852.6558 |
| S                      | 2.696636  | -1.119314   | 1.590281                       | 168.3186          | 978.004     | 2971.3227 |
| C                      | 3.254738  | -0.314313   | 0.073504                       | 204.7395          | 1009.2737   | 3043.0387 |
| H                      | 0.720731  | 0.773209    | -0.283908                      | 245.5646          | 1068.7555   | 3065.797  |
| H                      | -1.025591 | 0.313567    | -0.297306                      | 252.972           | 1129.4873   | 3070.329  |
| H                      | 1.327457  | -0.192442   | 3.240773                       | 271.1183          | 1179.3983   | 3099.2712 |
| H                      | 1.797388  | 1.03273     | 2.065789                       | 373.0403          | 1223.1355   | 3126.5346 |
| H                      | 4.224754  | -0.745563   | -0.161911                      | 462.265           | 1259.7954   | 3154.5357 |
| H                      | 2.563547  | -0.513382   | -0.741754                      | 509.6488          | 1273.5291   | 3170.2914 |
| H                      | 3.37863   | 0.756292    | 0.232732                       | 660.9953          | 1315.3816   |           |
| O                      | 0.312323  | -1.221825   | -0.468433                      | 703.3346          | 1325.8655   |           |
| H                      | 0.090847  | -2.026364   | 0.583421                       | 727.4523          | 1349.9036   |           |
| H                      | -0.530737 | 0.880567    | 1.928889                       | 751.7129          | 1390.1484   |           |
| O                      | -0.788977 | -1.067319   | 1.982404                       | 840.2925          | 1433.6038   |           |
| O                      | -0.194959 | -2.250928   | 1.609018                       | 855.9208          | 1463.4155   |           |

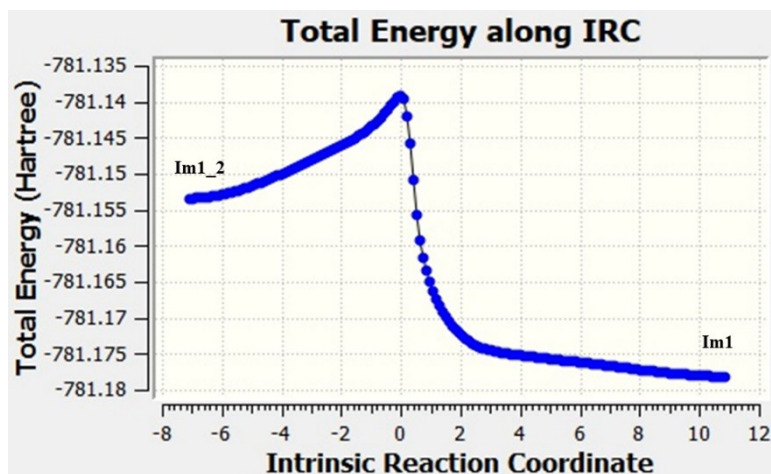

| Rx Coord | Energy      | Rx Coord | Energy           | Rx Coord | Energy      |
|----------|-------------|----------|------------------|----------|-------------|
| -7.05001 | -781.153461 | -0.97301 | -781.143486      | 5.09576  | -781.175782 |
| -6.94157 | -781.153441 | -0.86451 | -781.143087      | 5.2043   | -781.175833 |
| -6.83318 | -781.153417 | -0.75601 | -781.142654      | 5.31283  | -781.175884 |
| -6.72474 | -781.153385 | -0.6475  | -781.142187      | 5.42137  | -781.175934 |
| -6.61631 | -781.153346 | -0.53899 | -781.141686      | 5.52991  | -781.175985 |
| -6.50784 | -781.153299 | -0.43049 | -781.141154      | 5.63844  | -781.176036 |
| -6.39936 | -781.153244 | -0.32206 | -781.140606      | 5.74698  | -781.176087 |
| -6.29085 | -781.15318  | -0.2137  | -781.140046      | 5.85552  | -781.176139 |
| -6.18233 | -781.153106 | -0.10748 | -781.139516      | 5.96406  | -781.176191 |
| -6.0738  | -781.153023 | <b>0</b> | <b>-781.1392</b> | 6.07259  | -781.176243 |
| -5.96527 | -781.152932 | 0.10828  | -781.139734      | 6.18113  | -781.176296 |
| -5.85673 | -781.152831 | 0.21674  | -781.14195       | 6.28967  | -781.176349 |
| -5.74819 | -781.152722 | 0.32525  | -781.145879      | 6.39821  | -781.176403 |
| -5.63966 | -781.152605 | 0.43376  | -781.150825      | 6.50675  | -781.176457 |
| -5.53112 | -781.15248  | 0.54218  | -781.155672      | 6.61529  | -781.176512 |
| -5.42258 | -781.152348 | 0.64985  | -781.159269      | 6.72383  | -781.176567 |
| -5.31404 | -781.152208 | 0.75667  | -781.161677      | 6.83237  | -781.176623 |
| -5.20549 | -781.152063 | 0.86491  | -781.163509      | 6.94091  | -781.176679 |
| -5.09695 | -781.151911 | 0.97323  | -781.165024      | 7.04945  | -781.176735 |
| -4.98841 | -781.151753 | 1.08153  | -781.166288      | 7.15799  | -781.176792 |
| -4.87987 | -781.15159  | 1.18989  | -781.167366      | 7.26653  | -781.176849 |
| -4.77133 | -781.151421 | 1.29831  | -781.168308      | 7.37506  | -781.176905 |
| -4.66279 | -781.151248 | 1.4068   | -781.169144      | 7.4836   | -781.176962 |
| -4.55425 | -781.151071 | 1.51531  | -781.16989       | 7.59214  | -781.177019 |
| -4.44571 | -781.150889 | 1.62384  | -781.170558      | 7.70068  | -781.177075 |
| -4.33717 | -781.150704 | 1.73236  | -781.171153      | 7.80922  | -781.177132 |

|          |             |         |             |          |             |
|----------|-------------|---------|-------------|----------|-------------|
| -4.22863 | -781.150515 | 1.84089 | -781.171684 | 7.91776  | -781.177187 |
| -4.12009 | -781.150322 | 1.94942 | -781.172154 | 8.0263   | -781.177243 |
| -4.01155 | -781.150127 | 2.05795 | -781.172569 | 8.13484  | -781.177298 |
| -3.90301 | -781.149929 | 2.16647 | -781.172935 | 8.24338  | -781.177352 |
| -3.79447 | -781.149729 | 2.27499 | -781.173254 | 8.35192  | -781.177405 |
| -3.68593 | -781.149526 | 2.3835  | -781.173532 | 8.46046  | -781.177457 |
| -3.57739 | -781.149321 | 2.492   | -781.173773 | 8.569    | -781.177508 |
| -3.46885 | -781.149114 | 2.60049 | -781.173981 | 8.67754  | -781.177558 |
| -3.36032 | -781.148906 | 2.70896 | -781.17416  | 8.78607  | -781.177606 |
| -3.25178 | -781.148696 | 2.81741 | -781.174314 | 8.89461  | -781.177654 |
| -3.14324 | -781.148484 | 2.92585 | -781.174446 | 9.00315  | -781.177699 |
| -3.0347  | -781.148271 | 3.03426 | -781.174562 | 9.11169  | -781.177743 |
| -2.92617 | -781.148058 | 3.14268 | -781.174664 | 9.22023  | -781.177786 |
| -2.81763 | -781.147842 | 3.25111 | -781.174756 | 9.32877  | -781.177827 |
| -2.7091  | -781.147626 | 3.35956 | -781.174839 | 9.43731  | -781.177866 |
| -2.60056 | -781.147409 | 3.46803 | -781.174917 | 9.54584  | -781.177904 |
| -2.49203 | -781.14719  | 3.57652 | -781.17499  | 9.65438  | -781.17794  |
| -2.3835  | -781.14697  | 3.68501 | -781.175059 | 9.76292  | -781.177974 |
| -2.27498 | -781.146748 | 3.79351 | -781.175124 | 9.87146  | -781.178006 |
| -2.16645 | -781.146524 | 3.90201 | -781.175187 | 9.97999  | -781.178037 |
| -2.05794 | -781.146297 | 4.01052 | -781.175248 | 10.08853 | -781.178066 |
| -1.94942 | -781.146066 | 4.11904 | -781.175306 | 10.19707 | -781.178094 |
| -1.84092 | -781.14583  | 4.22755 | -781.175363 | 10.30561 | -781.178119 |
| -1.73242 | -781.145588 | 4.33607 | -781.175418 | 10.41415 | -781.178143 |
| -1.62392 | -781.145337 | 4.44459 | -781.175472 | 10.52269 | -781.178166 |
| -1.51543 | -781.145075 | 4.55312 | -781.175525 | 10.63122 | -781.178186 |
| -1.40695 | -781.144799 | 4.66164 | -781.175577 | 10.73976 | -781.178205 |
| -1.29847 | -781.144506 | 4.77017 | -781.175629 | 10.8483  | -781.178223 |
| -1.18998 | -781.144192 | 4.8787  | -781.175681 |          |             |
| -1.0815  | -781.143853 | 4.98723 | -781.175732 |          |             |

TS2-3-A1\_Im2-->A1\_Im2\_1

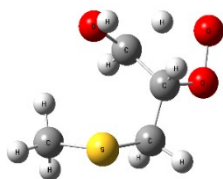

| Method                 |           |           |           |                                |           |           | Ee          | E+ZPE       | $\Delta H$  | $\Delta G$  |
|------------------------|-----------|-----------|-----------|--------------------------------|-----------|-----------|-------------|-------------|-------------|-------------|
| M06-2X/GD3/cc-pVTZ     |           |           |           |                                |           |           | -781.497426 | -781.367048 | -781.356822 | -781.40228  |
| M06-2X/DG3/aug-cc-pVTZ |           |           |           |                                |           |           | -781.504749 | -781.37457  | -781.364301 | -781.409896 |
| MN15/cc-pVTZ           |           |           |           |                                |           |           | -781.131094 | -781.001702 | -780.991325 | -781.037113 |
| MN15/aug-cc-pVTZ       |           |           |           |                                |           |           | -781.142495 | -781.013357 | -781.002974 | -781.048808 |
| Coordinates (xyz)      |           |           |           | Vibrations (cm <sup>-1</sup> ) |           |           |             |             |             |             |
| C                      | 0.019832  | -0.013367 | 0.011468  | <b>2004.7816i</b>              | 929.1373  | 1474.6455 |             |             |             |             |
| C                      | 0.014118  | -0.026337 | 1.542756  | 75.5828                        | 972.5871  | 1494.3447 |             |             |             |             |
| C                      | 1.355966  | 0.002096  | 2.245695  | 87.6582                        | 982.7411  | 1794.5998 |             |             |             |             |
| S                      | 2.321703  | -1.510875 | 1.992965  | 139.8312                       | 1033.1994 | 3014.6134 |             |             |             |             |
| C                      | 3.203326  | -1.102126 | 0.465871  | 193.2613                       | 1044.1303 | 3076.382  |             |             |             |             |
| H                      | 0.680609  | 0.725484  | -0.441955 | 210.6387                       | 1083.4058 | 3085.0162 |             |             |             |             |
| H                      | -1.14792  | 0.56272   | 0.03977   | 224.8807                       | 1139.3767 | 3120.3147 |             |             |             |             |
| H                      | -0.573213 | -0.89297  | 1.874254  | 286.4509                       | 1170.6294 | 3140.6503 |             |             |             |             |
| H                      | 1.190527  | 0.089118  | 3.318707  | 327.0294                       | 1230.8241 | 3162.6244 |             |             |             |             |
| H                      | 1.939028  | 0.864725  | 1.923637  | 348.8286                       | 1253.4492 | 3173.9631 |             |             |             |             |
| H                      | 3.911743  | -1.909994 | 0.298484  | 389.855                        | 1263.1616 | 3833.6343 |             |             |             |             |
| H                      | 2.529324  | -1.041697 | -0.38375  | 489.1692                       | 1292.8348 |           |             |             |             |             |
| H                      | 3.754202  | -0.172283 | 0.590292  | 577.8319                       | 1344.6424 |           |             |             |             |             |
| O                      | 0.099099  | -1.197482 | -0.653968 | 676.7222                       | 1358.2033 |           |             |             |             |             |
| H                      | -0.283861 | -1.903976 | -0.121737 | 724.9783                       | 1392.2439 |           |             |             |             |             |
| O                      | -0.678779 | 1.169716  | 1.838858  | 784.6963                       | 1444.8666 |           |             |             |             |             |
| O                      | -1.801733 | 1.119068  | 1.013146  | 831.3703                       | 1467.1136 |           |             |             |             |             |

TS2-4-A1\_Im3-->A1\_Im3\_1

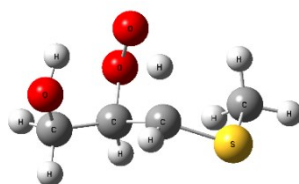

| Method                 |           | Ee          | E+ZPE                          | $\Delta H$       | $\Delta G$  |           |
|------------------------|-----------|-------------|--------------------------------|------------------|-------------|-----------|
| M06-2X/GD3/cc-pVTZ     |           | -781.503494 | -781.372444                    | -781.362546      | -781.407131 |           |
| M06-2X/DG3/aug-cc-pVTZ |           | -781.510595 | -781.379668                    | -781.369755      | -781.414368 |           |
| MN15/cc-pVTZ           |           | -781.138096 | -781.007776                    | -780.997837      | -781.042474 |           |
| MN15/aug-cc-pVTZ       |           | -781.149579 | -781.019481                    | -781.009523      | -781.054197 |           |
| Coordinates (xyz)      |           |             | Vibrations (cm <sup>-1</sup> ) |                  |             |           |
| C                      | -0.005774 | -0.000552   | -0.006558                      | <b>1999.046i</b> | 924.3155    | 1471.4312 |
| C                      | 0.006015  | -0.004212   | 1.516755                       | 83.9101          | 952.3773    | 1503.7994 |
| C                      | 1.445886  | -0.003623   | 2.064247                       | 110.8923         | 965.2995    | 1757.9099 |
| S                      | 1.775829  | 0.690683    | 3.618739                       | 153.6236         | 994.5494    | 3039.6767 |
| C                      | 0.472559  | -0.05247    | 4.622836                       | 205.4904         | 1008.4239   | 3078.5297 |
| H                      | 0.298527  | 0.985763    | -0.360386                      | 221.5273         | 1045.2962   | 3085.2151 |
| H                      | -1.036101 | -0.177676   | -0.331663                      | 232.2512         | 1066.1415   | 3103.6961 |
| H                      | 2.207856  | 0.294602    | 1.351476                       | 266.7593         | 1149.5876   | 3166.1379 |
| H                      | 1.389349  | -1.287332   | 2.133588                       | 327.5539         | 1233.017    | 3170.9394 |
| H                      | 0.641612  | 0.276492    | 5.644196                       | 385.3186         | 1241.3962   | 3182.994  |
| H                      | -0.509817 | 0.268544    | 4.286153                       | 487.0842         | 1256.3886   | 3808.686  |
| H                      | 0.540874  | -1.136267   | 4.555076                       | 586.7573         | 1314.7746   |           |
| O                      | 0.880731  | -0.934397   | -0.571806                      | 623.403          | 1360.5088   |           |
| H                      | 0.73926   | -1.780693   | -0.130342                      | 718.7401         | 1363.3612   |           |
| H                      | -0.601679 | 0.822739    | 1.891563                       | 759.3709         | 1396.6746   |           |
| O                      | -0.575254 | -1.183962   | 2.059599                       | 866.5591         | 1441.4124   |           |
| O                      | 0.411253  | -2.164359   | 1.946433                       | 890.7642         | 1467.9687   |           |



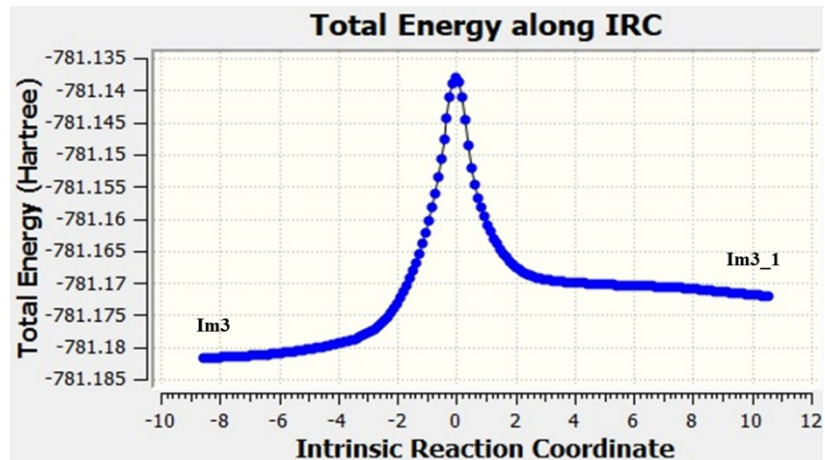

| Rx Coord | Energy      | Rx Coord | Energy      | Rx Coord | Energy      |
|----------|-------------|----------|-------------|----------|-------------|
| -8.53907 | -781.181713 | -2.10757 | -781.174057 | 4.31943  | -781.170092 |
| -8.43362 | -781.181692 | -2.00212 | -781.173281 | 4.42487  | -781.170122 |
| -8.32816 | -781.181671 | -1.89666 | -781.172426 | 4.53032  | -781.170151 |
| -8.22271 | -781.181649 | -1.79121 | -781.171487 | 4.63576  | -781.170179 |
| -8.11726 | -781.181627 | -1.68576 | -781.170463 | 4.74121  | -781.170205 |
| -8.01182 | -781.181605 | -1.58031 | -781.169349 | 4.84666  | -781.170229 |
| -7.90637 | -781.181583 | -1.47487 | -781.168141 | 4.95211  | -781.170252 |
| -7.80093 | -781.18156  | -1.36945 | -781.166834 | 5.05756  | -781.170274 |
| -7.69549 | -781.181537 | -1.26404 | -781.165419 | 5.16301  | -781.170294 |
| -7.59005 | -781.181513 | -1.15865 | -781.16388  | 5.26846  | -781.170314 |
| -7.48461 | -781.181489 | -1.05328 | -781.162198 | 5.37392  | -781.170333 |
| -7.37917 | -781.181463 | -0.94793 | -781.160346 | 5.47937  | -781.170351 |
| -7.27374 | -781.181436 | -0.84258 | -781.158293 | 5.58482  | -781.170368 |
| -7.1683  | -781.181409 | -0.73723 | -781.156014 | 5.69026  | -781.170385 |
| -7.06286 | -781.18138  | -0.6319  | -781.153481 | 5.79571  | -781.170402 |
| -6.95742 | -781.181349 | -0.52666 | -781.15068  | 5.90115  | -781.170419 |
| -6.85198 | -781.181317 | -0.42148 | -781.147567 | 6.00659  | -781.170435 |
| -6.74654 | -781.181283 | -0.3162  | -781.144274 | 6.11204  | -781.170452 |
| -6.64109 | -781.181247 | -0.21082 | -781.141183 | 6.21748  | -781.170469 |
| -6.53564 | -781.18121  | -0.10543 | -781.138931 | 6.32292  | -781.170487 |
| -6.4302  | -781.18117  | 0        | -781.138069 | 6.42837  | -781.170506 |
| -6.32475 | -781.181127 | 0.10537  | -781.138861 | 6.53382  | -781.170525 |
| -6.2193  | -781.181083 | 0.21079  | -781.141207 | 6.63926  | -781.170546 |
| -6.11384 | -781.181036 | 0.31623  | -781.144693 | 6.74471  | -781.170567 |
| -6.00839 | -781.180986 | 0.42163  | -781.148636 | 6.85016  | -781.17059  |
| -5.90294 | -781.180934 | 0.52683  | -781.152201 | 6.95561  | -781.170614 |
| -5.79748 | -781.180879 | 0.63116  | -781.15478  | 7.06106  | -781.17064  |

|          |             |         |             |          |             |
|----------|-------------|---------|-------------|----------|-------------|
| -5.69203 | -781.180822 | 0.73591 | -781.156733 | 7.16651  | -781.170668 |
| -5.58658 | -781.180761 | 0.84111 | -781.158328 | 7.27197  | -781.170697 |
| -5.48112 | -781.180697 | 0.94643 | -781.159722 | 7.37742  | -781.170728 |
| -5.37567 | -781.180631 | 1.05183 | -781.160962 | 7.48287  | -781.170761 |
| -5.27021 | -781.180561 | 1.15725 | -781.162074 | 7.58833  | -781.170796 |
| -5.16476 | -781.180488 | 1.26269 | -781.163072 | 7.69378  | -781.170833 |
| -5.05931 | -781.180412 | 1.36813 | -781.163965 | 7.79923  | -781.170871 |
| -4.95386 | -781.180332 | 1.47357 | -781.164761 | 7.90468  | -781.170911 |
| -4.8484  | -781.180249 | 1.57901 | -781.165469 | 8.01014  | -781.170952 |
| -4.74295 | -781.180162 | 1.68446 | -781.166094 | 8.11559  | -781.170996 |
| -4.6375  | -781.180072 | 1.7899  | -781.166644 | 8.22104  | -781.17104  |
| -4.53205 | -781.179978 | 1.89533 | -781.167125 | 8.3265   | -781.171086 |
| -4.4266  | -781.179881 | 2.00077 | -781.167544 | 8.43195  | -781.171133 |
| -4.32115 | -781.179779 | 2.10619 | -781.167906 | 8.5374   | -781.171181 |
| -4.21571 | -781.179674 | 2.21161 | -781.168217 | 8.64285  | -781.17123  |
| -4.11026 | -781.179564 | 2.31702 | -781.168482 | 8.7483   | -781.171279 |
| -4.00482 | -781.17945  | 2.42241 | -781.168707 | 8.85376  | -781.171329 |
| -3.89938 | -781.179331 | 2.52778 | -781.168897 | 8.95921  | -781.171379 |
| -3.79395 | -781.179207 | 2.63313 | -781.169057 | 9.06466  | -781.17143  |
| -3.68853 | -781.179076 | 2.73846 | -781.169192 | 9.17011  | -781.17148  |
| -3.58311 | -781.17894  | 2.84379 | -781.169307 | 9.27556  | -781.171531 |
| -3.47772 | -781.178794 | 2.94912 | -781.169406 | 9.38101  | -781.171581 |
| -3.37235 | -781.178639 | 3.05446 | -781.169493 | 9.48646  | -781.171631 |
| -3.267   | -781.178469 | 3.15982 | -781.16957  | 9.59191  | -781.171681 |
| -3.16166 | -781.178282 | 3.2652  | -781.169639 | 9.69736  | -781.171731 |
| -3.05632 | -781.178071 | 3.37059 | -781.169702 | 9.80281  | -781.17178  |
| -2.95097 | -781.177829 | 3.47599 | -781.169759 | 9.90826  | -781.171829 |
| -2.84559 | -781.17755  | 3.5814  | -781.169811 | 10.01371 | -781.171877 |
| -2.74019 | -781.177228 | 3.68681 | -781.16986  | 10.11916 | -781.171924 |
| -2.63478 | -781.176854 | 3.79224 | -781.169905 | 10.22461 | -781.171971 |
| -2.52935 | -781.176426 | 3.89767 | -781.169947 | 10.33006 | -781.172017 |
| -2.42391 | -781.175936 | 4.00311 | -781.169987 | 10.43551 | -781.172061 |
| -2.31847 | -781.17538  | 4.10855 | -781.170024 | 10.54096 | -781.172105 |
| -2.21302 | -781.174755 | 4.21399 | -781.170059 |          |             |

TS2-5-A1\_Im3-->A1\_Im3\_2

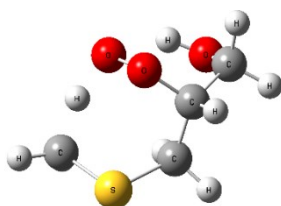

| Method                 |           |           |           | Ee                             | E+ZPE       | $\Delta H$  | $\Delta G$  |
|------------------------|-----------|-----------|-----------|--------------------------------|-------------|-------------|-------------|
| M06-2X/GD3/cc-pVTZ     |           |           |           | -781.516276                    | -781.384996 | -781.375681 | -781.418703 |
| M06-2X/DG3/aug-cc-pVTZ |           |           |           | -781.523087                    | -781.391968 | -781.382628 | -781.425718 |
| MN15/cc-pVTZ           |           |           |           | -781.148226                    | -781.017697 | -781.008333 | -781.051384 |
| MN15/aug-cc-pVTZ       |           |           |           | -781.159251                    | -781.029004 | -781.019611 | -781.062742 |
| Coordinates (xyz)      |           |           |           | Vibrations (cm <sup>-1</sup> ) |             |             |             |
| C                      | 0.008203  | -0.007148 | -0.002357 | <b>1962.5448i</b>              | 900.4099    | 1471.1991   |             |
| C                      | 0.000247  | -0.001669 | 1.520688  | 80.2542                        | 958.1124    | 1482.5334   |             |
| C                      | 1.404218  | 0.022147  | 2.118518  | 145.806                        | 983.8615    | 1499.9185   |             |
| S                      | 1.37682   | -0.528139 | 3.852493  | 208.465                        | 1020.9474   | 3044.6487   |             |
| C                      | 1.512341  | -2.243319 | 3.559974  | 252.6789                       | 1036.9844   | 3091.0726   |             |
| H                      | 0.391888  | 0.95132   | -0.356195 | 270.6608                       | 1089.0321   | 3098.4938   |             |
| H                      | -1.026962 | -0.105124 | -0.343966 | 306.8339                       | 1120.0456   | 3101.7422   |             |
| H                      | 1.802409  | 1.034352  | 2.092258  | 329.5542                       | 1156.433    | 3104.6843   |             |
| H                      | 2.080596  | -0.624975 | 1.563807  | 406.5752                       | 1207.1804   | 3158.5605   |             |
| H                      | 1.346712  | -2.826248 | 4.459057  | 479.9257                       | 1250.0323   | 3207.6168   |             |
| H                      | 0.573761  | -2.466451 | 2.679477  | 495.401                        | 1263.9934   | 3821.5239   |             |
| H                      | 2.39901   | -2.535369 | 3.00116   | 538.2169                       | 1279.5704   |             |             |
| O                      | 0.831475  | -1.004402 | -0.560498 | 605.2852                       | 1342.9331   |             |             |
| H                      | 0.570473  | -1.843998 | -0.16502  | 690.5492                       | 1376.4059   |             |             |
| H                      | -0.561586 | 0.868371  | 1.866337  | 768.8201                       | 1402.1114   |             |             |
| O                      | -0.78158  | -1.081073 | 2.048252  | 811.7664                       | 1424.758    |             |             |
| O                      | -0.207923 | -2.294858 | 1.727247  | 826.5948                       | 1442.3449   |             |             |

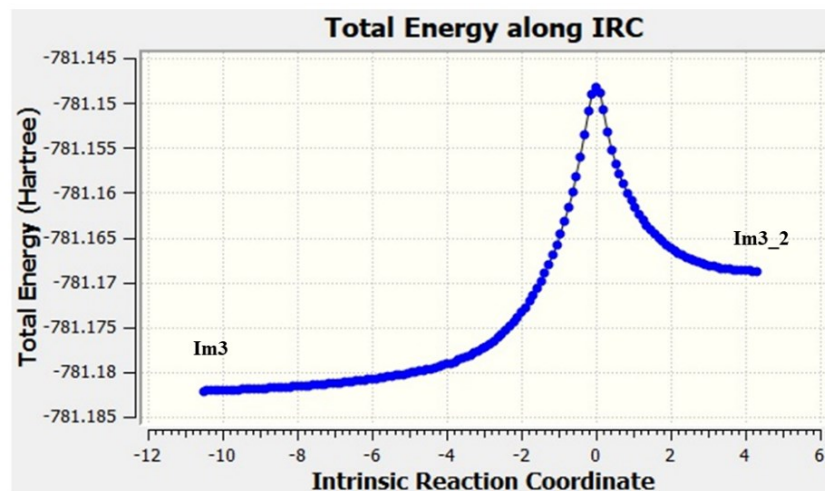

| Rx Coord  | Energy      | Rx Coord | Energy      | Rx Coord | Energy      |
|-----------|-------------|----------|-------------|----------|-------------|
| -10.51783 | -781.182129 | -5.46809 | -781.180472 | -0.42011 | -781.156063 |
| -10.41262 | -781.182113 | -5.36289 | -781.180402 | -0.31538 | -781.153592 |
| -10.30742 | -781.182096 | -5.2577  | -781.18033  | -0.2103  | -781.150987 |
| -10.20221 | -781.182079 | -5.1525  | -781.180255 | -0.10515 | -781.148982 |
| -10.097   | -781.182061 | -5.0473  | -781.180177 | 0        | -781.148213 |
| -9.9918   | -781.182043 | -4.94211 | -781.180096 | 0.10507  | -781.148904 |
| -9.88659  | -781.182025 | -4.83692 | -781.180012 | 0.21022  | -781.150806 |
| -9.78139  | -781.182006 | -4.73173 | -781.179924 | 0.31531  | -781.153254 |
| -9.67619  | -781.181987 | -4.62654 | -781.179831 | 0.41952  | -781.155306 |
| -9.57098  | -781.181968 | -4.52135 | -781.179734 | 0.52309  | -781.156784 |
| -9.46578  | -781.181948 | -4.41616 | -781.179631 | 0.62811  | -781.157986 |
| -9.36058  | -781.181928 | -4.31098 | -781.179523 | 0.73325  | -781.159063 |
| -9.25537  | -781.181907 | -4.20579 | -781.179407 | 0.8384   | -781.160026 |
| -9.15017  | -781.181887 | -4.1006  | -781.179284 | 0.94355  | -781.160891 |
| -9.04497  | -781.181865 | -3.99541 | -781.179152 | 1.04872  | -781.161672 |
| -8.93977  | -781.181843 | -3.89022 | -781.179011 | 1.15388  | -781.162379 |
| -8.83456  | -781.181821 | -3.78503 | -781.178859 | 1.25906  | -781.163021 |
| -8.72936  | -781.181797 | -3.67984 | -781.178696 | 1.36424  | -781.163605 |
| -8.62416  | -781.181773 | -3.57465 | -781.178521 | 1.46943  | -781.164137 |
| -8.51896  | -781.181748 | -3.46945 | -781.178332 | 1.57461  | -781.164622 |
| -8.41376  | -781.181723 | -3.36426 | -781.178129 | 1.6798   | -781.165063 |
| -8.30856  | -781.181696 | -3.25907 | -781.17791  | 1.78499  | -781.165465 |
| -8.20335  | -781.181668 | -3.15387 | -781.177673 | 1.89018  | -781.16583  |
| -8.09815  | -781.18164  | -3.04868 | -781.177418 | 1.99537  | -781.166163 |
| -7.99295  | -781.18161  | -2.94349 | -781.177142 | 2.10056  | -781.166464 |
| -7.88775  | -781.181579 | -2.83829 | -781.176844 | 2.20575  | -781.166738 |

|          |             |          |             |         |             |
|----------|-------------|----------|-------------|---------|-------------|
| -7.78255 | -781.181547 | -2.7331  | -781.176522 | 2.31094 | -781.166987 |
| -7.67735 | -781.181514 | -2.6279  | -781.176174 | 2.41614 | -781.167212 |
| -7.57215 | -781.18148  | -2.52271 | -781.175797 | 2.52133 | -781.167415 |
| -7.46694 | -781.181444 | -2.41751 | -781.17539  | 2.62652 | -781.167599 |
| -7.36174 | -781.181408 | -2.31231 | -781.17495  | 2.73172 | -781.167764 |
| -7.25654 | -781.181369 | -2.20712 | -781.174473 | 2.83691 | -781.167912 |
| -7.15134 | -781.18133  | -2.10192 | -781.173957 | 2.94211 | -781.168045 |
| -7.04614 | -781.181289 | -1.99672 | -781.173399 | 3.04731 | -781.168162 |
| -6.94094 | -781.181246 | -1.89152 | -781.172796 | 3.1525  | -781.168266 |
| -6.83573 | -781.181202 | -1.78632 | -781.172145 | 3.25769 | -781.168356 |
| -6.73053 | -781.181157 | -1.68113 | -781.171441 | 3.36287 | -781.168434 |
| -6.62533 | -781.18111  | -1.57594 | -781.17068  | 3.46805 | -781.168501 |
| -6.52013 | -781.181061 | -1.47075 | -781.169858 | 3.5732  | -781.168557 |
| -6.41492 | -781.18101  | -1.36557 | -781.168969 | 3.67833 | -781.168604 |
| -6.30972 | -781.180958 | -1.2604  | -781.168005 | 3.78342 | -781.168643 |
| -6.20451 | -781.180904 | -1.15524 | -781.166958 | 3.88847 | -781.168675 |
| -6.09931 | -781.180848 | -1.05009 | -781.165815 | 3.99349 | -781.168701 |
| -5.99411 | -781.18079  | -0.94495 | -781.164564 | 4.09852 | -781.168722 |
| -5.8889  | -781.180731 | -0.83982 | -781.163189 | 4.20358 | -781.16874  |
| -5.7837  | -781.180669 | -0.73469 | -781.161676 | 4.30869 | -781.168755 |
| -5.6785  | -781.180606 | -0.62958 | -781.160009 |         |             |
| -5.5733  | -781.18054  | -0.52462 | -781.158176 |         |             |

TS2-6\_A1\_Im1\_1-->Pw3

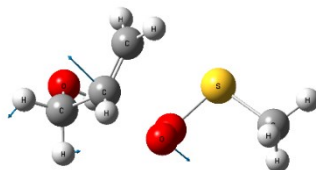

| Method                 | Ee          | E+ZPE       | $\Delta H$                     | $\Delta G$       |           |           |
|------------------------|-------------|-------------|--------------------------------|------------------|-----------|-----------|
| M06-2X/GD3/cc-pVTZ     | -781.477072 | -781.346077 | -781.334816                    | -781.383596      |           |           |
| M06-2X/DG3/aug-cc-pVTZ | -781.48432  | -781.353493 | -781.342181                    | -781.391168      |           |           |
| MN15/cc-pVTZ           | -781.11047  | -780.980052 | -780.968773                    | -781.017409      |           |           |
| MN15/aug-cc-pVTZ       | -781.121754 | -780.991668 | -780.980311                    | -781.029425      |           |           |
| Coordinates (xyz)      |             |             | Vibrations (cm <sup>-1</sup> ) |                  |           |           |
| C                      | 0.022736    | -0.026186   | -0.029852                      | <b>583.6835i</b> | 867.7162  | 1499.7326 |
| C                      | 0.00986     | 0.075918    | 1.472418                       | 36.2445          | 896.414   | 1562.121  |
| C                      | 1.15759     | 0.088006    | 2.209735                       | 44.308           | 916.212   | 3056.722  |
| S                      | 1.269505    | -3.23546    | 2.46688                        | 89.9236          | 971.1372  | 3075.2498 |
| C                      | 0.177778    | -4.139515   | 3.568689                       | 130.6137         | 974.691   | 3095.7816 |
| H                      | 0.031651    | 0.982723    | -0.447527                      | 151.9779         | 977.6513  | 3163.4586 |
| H                      | -0.898192   | -0.513203   | -0.359412                      | 173.752          | 1027.9137 | 3177.8984 |
| H                      | 1.137068    | 0.301017    | 3.267802                       | 227.2767         | 1069.6829 | 3178.969  |
| H                      | 2.102966    | -0.174066   | 1.756647                       | 291.1815         | 1155.6293 | 3182.0535 |
| H                      | 0.814916    | -4.53979    | 4.356453                       | 313.7307         | 1222.9832 | 3279.649  |
| H                      | -0.550533   | -3.459427   | 4.001146                       | 404.2746         | 1270.8245 | 3845.6679 |
| H                      | -0.308865   | -4.954304   | 3.039632                       | 452.2028         | 1336.0798 |           |
| O                      | 1.162037    | -0.682562   | -0.532642                      | 462.9273         | 1395.5289 |           |
| H                      | 1.099003    | -1.606543   | -0.269957                      | 552.1839         | 1417.7906 |           |
| H                      | -0.895145   | 0.487297    | 1.90437                        | 636.5536         | 1433.2366 |           |
| O                      | -0.697087   | -1.727181   | 1.9036                         | 719.2531         | 1452.5659 |           |
| O                      | 0.14166     | -2.673685   | 1.366051                       | 751.1208         | 1485.322  |           |

Pw3

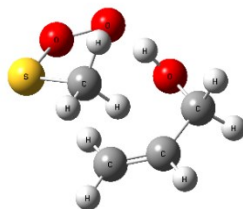

| Pw3                    |           |           |             |                                |             |             |
|------------------------|-----------|-----------|-------------|--------------------------------|-------------|-------------|
|                        |           |           |             |                                |             |             |
| Method                 |           |           | Ee          | E+ZPE                          | ΔH          | ΔG          |
| M06-2X/GD3/cc-pVTZ     |           |           | -781.499224 | -781.367701                    | -781.355272 | -781.407321 |
| M06-2X/DG3/aug-cc-pVTZ |           |           | -781.506303 | -781.37501                     | -781.362524 | -781.41479  |
| MN15/cc-pVTZ           |           |           | -781.130358 | -780.999664                    | -780.987143 | -781.039723 |
| MN15/aug-cc-pVTZ       |           |           | -781.141397 | -781.010934                    | -780.998419 | -781.05073  |
| Coordinates (xyz)      |           |           |             | Vibrations (cm <sup>-1</sup> ) |             |             |
| C                      | -0.253223 | -0.056374 | 0.232513    | 29.6964                        | 901.3761    | 1489.7426   |
| C                      | 0.157309  | 0.109076  | 1.667137    | 56.8095                        | 969.0786    | 1734.0753   |
| C                      | 1.398783  | 0.015031  | 2.116988    | 71.355                         | 975.6899    | 3012.3953   |
| S                      | 2.061056  | -3.364062 | 2.851688    | 83.1356                        | 979.4153    | 3071.6426   |
| C                      | 0.305129  | -3.364968 | 3.157638    | 95.1824                        | 998.5423    | 3077.3397   |
| H                      | -0.720005 | 0.869765  | -0.11114    | 123.5003                       | 1027.1664   | 3149.4758   |
| H                      | -1.024772 | -0.834233 | 0.171475    | 149.6277                       | 1050.571    | 3161.3297   |
| H                      | 1.631043  | 0.151732  | 3.16428     | 214.258                        | 1166.5402   | 3169.6585   |
| H                      | 2.220047  | -0.187873 | 1.441518    | 226.4867                       | 1233.18     | 3183.1115   |
| H                      | 0.227896  | -3.526364 | 4.233283    | 287.1318                       | 1243.1986   | 3252.9859   |
| H                      | -0.118042 | -2.400578 | 2.888249    | 290.673                        | 1316.2399   | 3823.2093   |
| H                      | -0.183574 | -4.173811 | 2.623138    | 455.0763                       | 1339.7523   |             |
| O                      | 0.807535  | -0.327088 | -0.647638   | 475.7759                       | 1398.993    |             |
| H                      | 1.074739  | -1.243858 | -0.518296   | 582.4673                       | 1417.2975   |             |
| H                      | -0.654642 | 0.328445  | 2.355521    | 620.4208                       | 1441.4402   |             |
| O                      | 0.930214  | -2.974366 | 0.580828    | 633.264                        | 1443.0799   |             |
| O                      | 2.077768  | -3.058455 | 1.161271    | 735.4316                       | 1474.2028   |             |

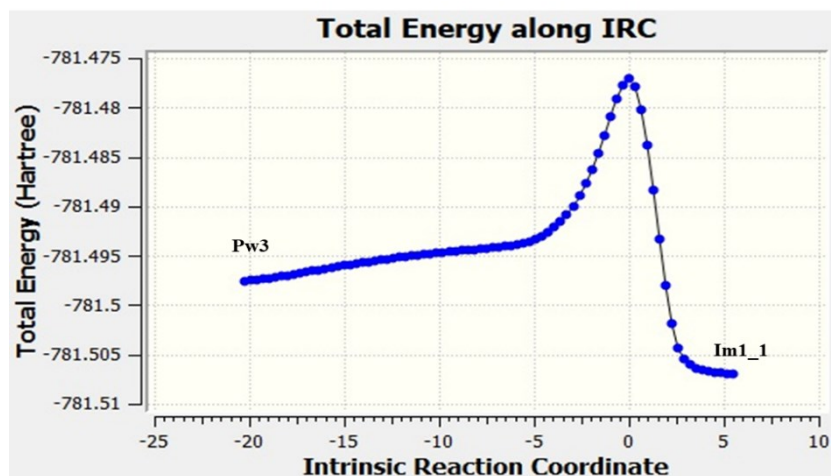

| Rx Coord  | Energy      | Rx Coord  | Energy      | Rx Coord | Energy           |
|-----------|-------------|-----------|-------------|----------|------------------|
| -20.25539 | -781.497563 | -11.43252 | -781.495015 | -2.61405 | -781.488947      |
| -19.93013 | -781.497514 | -11.10566 | -781.49494  | -2.28722 | -781.48773       |
| -19.60406 | -781.497453 | -10.77885 | -781.494867 | -1.96039 | -781.486304      |
| -19.27741 | -781.497381 | -10.45205 | -781.494798 | -1.63361 | -781.484664      |
| -18.95064 | -781.497299 | -10.12526 | -781.494732 | -1.30681 | -781.482843      |
| -18.62381 | -781.497208 | -9.79845  | -781.494668 | -0.9801  | -781.480944      |
| -18.29696 | -781.497107 | -9.47166  | -781.494607 | -0.65332 | -781.479132      |
| -17.97009 | -781.496999 | -9.14485  | -781.494547 | -0.32677 | -781.477687      |
| -17.64319 | -781.496887 | -8.81807  | -781.494488 | <b>0</b> | <b>-781.4771</b> |
| -17.31631 | -781.496778 | -8.49136  | -781.494429 | 0.3269   | -781.477836      |
| -16.98944 | -781.496666 | -8.16469  | -781.49437  | 0.65371  | -781.48017       |
| -16.66256 | -781.496553 | -7.83805  | -781.494313 | 0.98056  | -781.483831      |
| -16.33566 | -781.496438 | -7.51147  | -781.494256 | 1.30739  | -781.488363      |
| -16.00879 | -781.496326 | -7.18513  | -781.494198 | 1.63424  | -781.493261      |
| -15.68189 | -781.496216 | -6.85914  | -781.494137 | 1.96105  | -781.497956      |
| -15.35501 | -781.496109 | -6.5334   | -781.494067 | 2.28765  | -781.501853      |
| -15.02811 | -781.496005 | -6.20761  | -781.493982 | 2.61259  | -781.504369      |
| -14.70123 | -781.495905 | -5.88154  | -781.493875 | 2.92535  | -781.505489      |
| -14.37435 | -781.495805 | -5.55534  | -781.493735 | 3.24648  | -781.50605       |
| -14.04748 | -781.495705 | -5.22874  | -781.493548 | 3.56969  | -781.506379      |
| -13.72058 | -781.495607 | -4.90194  | -781.493301 | 3.89116  | -781.506567      |
| -13.39371 | -781.495512 | -4.57507  | -781.492989 | 4.21235  | -781.506683      |
| -13.06683 | -781.495421 | -4.24824  | -781.492608 | 4.53847  | -781.506773      |
| -12.73997 | -781.495334 | -3.92142  | -781.492132 | 4.86509  | -781.50685       |
| -12.41308 | -781.49525  | -3.59459  | -781.491541 | 5.19171  | -781.506912      |
| -12.08622 | -781.495171 | -3.26773  | -781.490822 | 5.51844  | -781.506964      |
| -11.75936 | -781.495092 | -2.94089  | -781.489968 |          |                  |



TS2-7\_A1\_Im3\_1-->Pw4

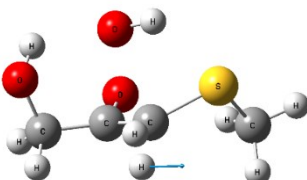

| Method                 | Ee          | E+ZPE       | $\Delta H$                     | $\Delta G$        |           |           |
|------------------------|-------------|-------------|--------------------------------|-------------------|-----------|-----------|
| M06-2X/GD3/cc-pVTZ     | -781.466816 | -781.33799  | -781.326788                    | -781.374381       |           |           |
| M06-2X/DG3/aug-cc-pVTZ | -781.474851 | -781.346386 | -781.335084                    | -781.382919       |           |           |
| MN15/cc-pVTZ           | -781.129275 | -781.000337 | -780.989413                    | -781.035983       |           |           |
| MN15/aug-cc-pVTZ       | -781.142652 | -781.013861 | -781.002879                    | -781.049624       |           |           |
| Coordinates (xyz)      |             |             | Vibrations (cm <sup>-1</sup> ) |                   |           |           |
| C                      | 0.004865    | 0.021517    | 0.018904                       | <b>1825.5109i</b> | 737.7184  | 1494.047  |
| C                      | 0.014044    | -0.044638   | 1.516271                       | 64.4641           | 793.0784  | 1498.6507 |
| C                      | 1.305785    | -0.005615   | 2.234786                       | 76.7267           | 898.1233  | 2155.7315 |
| S                      | 1.534735    | -0.705518   | 3.828844                       | 108.6614          | 974.6206  | 3062.86   |
| C                      | 0.365457    | 0.258684    | 4.835076                       | 144.0612          | 985.023   | 3078.0687 |
| H                      | 0.658298    | 0.818456    | -0.335534                      | 172.2921          | 994.8919  | 3119.7444 |
| H                      | -1.014519   | 0.229619    | -0.314608                      | 189.2112          | 1070.2244 | 3168.5657 |
| H                      | 2.18945     | 0.207318    | 1.650266                       | 219.3323          | 1131.8639 | 3182.1051 |
| H                      | -0.196706   | -2.247475   | 2.817399                       | 283.9397          | 1194.3586 | 3217.6975 |
| H                      | 0.470774    | -0.10764    | 5.853305                       | 329.171           | 1235.3769 | 3704.0026 |
| H                      | 0.636204    | 1.311533    | 4.798434                       | 371.1873          | 1312.3862 | 3830.8522 |
| H                      | -0.65376    | 0.107283    | 4.492679                       | 436.6236          | 1318.0274 |           |
| H                      | 0.04643     | -1.916159   | -0.102451                      | 472.9087          | 1336.1927 |           |
| O                      | 0.494474    | -1.184119   | -0.541273                      | 481.0478          | 1351.5259 |           |
| H                      | 0.442542    | 0.996608    | 2.155007                       | 568.9352          | 1379.6876 |           |
| O                      | -1.026563   | -0.646296   | 2.125264                       | 634.514           | 1432.9079 |           |
| O                      | -0.797175   | -2.133512   | 2.061219                       | 709.0842          | 1469.1625 |           |

Pw4

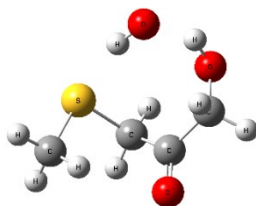

| Pw4                    |           |             |             |                                |             |           |
|------------------------|-----------|-------------|-------------|--------------------------------|-------------|-----------|
|                        |           |             |             |                                |             |           |
| Method                 |           | Ee          | E+ZPE       | ΔH                             | ΔG          |           |
| M06-2X/GD3/cc-pVTZ     |           | -781.601363 | -781.469846 | -781.457576                    | -781.508422 |           |
| M06-2X/DG3/aug-cc-pVTZ |           | -781.609065 | -781.47792  | -781.465521                    | -781.516841 |           |
| MN15/cc-pVTZ           |           | -781.229018 | -781.098298 | -781.085907                    | -781.137063 |           |
| Coordinates (xyz)      |           |             |             | Vibrations (cm <sup>-1</sup> ) |             |           |
| C                      | -0.078027 | -0.222841   | 0.32311     | 29.2368                        | 743.6938    | 1486.2205 |
| C                      | 0.257801  | 0.63403     | 1.536976    | 59.1243                        | 800.521     | 1830.921  |
| C                      | 1.601698  | 0.452807    | 2.194261    | 78.983                         | 897.5435    | 3044.7812 |
| S                      | 1.50416   | -0.994425   | 3.295314    | 112.5396                       | 965.7649    | 3079.7345 |
| C                      | 0.318425  | -0.377066   | 4.514466    | 134.3286                       | 987.8136    | 3096.4961 |
| H                      | -0.45237  | 0.460901    | -0.441623   | 167.6854                       | 1015.2324   | 3110.9158 |
| H                      | -0.914898 | -0.87046    | 0.60417     | 182.8409                       | 1132.0144   | 3168.8656 |
| H                      | 2.378198  | 0.224171    | 1.47014     | 194.4606                       | 1148.3761   | 3176.7072 |
| H                      | 0.386593  | -2.669331   | 2.05957     | 265.7798                       | 1208.5403   | 3184.7875 |
| H                      | 0.154167  | -1.184719   | 5.223158    | 281.0901                       | 1247.562    | 3515.9782 |
| H                      | 0.737522  | 0.482204    | 5.032239    | 312.5118                       | 1287.7522   | 3817.0467 |
| H                      | -0.621197 | -0.101343   | 4.043054    | 375.357                        | 1360.4974   |           |
| H                      | 0.879642  | -1.879951   | 0.035403    | 487.2184                       | 1363.8874   |           |
| O                      | 1.011241  | -0.949877   | -0.180689   | 520.9922                       | 1397.7504   |           |
| H                      | 1.849355  | 1.332433    | 2.783115    | 557.0076                       | 1444.6536   |           |
| O                      | -0.561111 | 1.39996     | 1.981447    | 649.4068                       | 1469.2042   |           |
| O                      | -0.050726 | -3.165592   | 1.330461    | 703.7178                       | 1470.5735   |           |

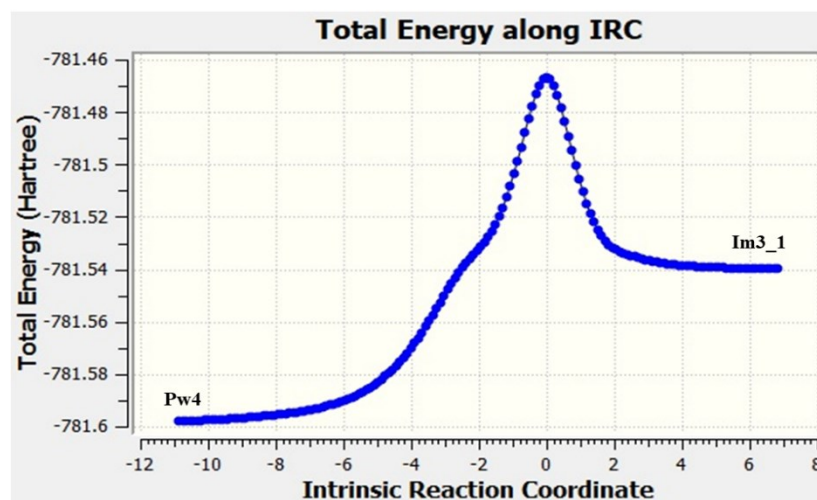

| Rx Coord  | Energy      | Rx Coord | Energy      | Rx Coord | Energy      |
|-----------|-------------|----------|-------------|----------|-------------|
| -10.86302 | -781.598052 | -4.88741 | -781.582013 | 1.08648  | -781.510478 |
| -10.75437 | -781.597998 | -4.77875 | -781.580845 | 1.19512  | -781.514866 |
| -10.64572 | -781.597941 | -4.6701  | -781.579593 | 1.30376  | -781.518757 |
| -10.53707 | -781.597881 | -4.56145 | -781.578254 | 1.41238  | -781.522132 |
| -10.42841 | -781.597819 | -4.45279 | -781.576823 | 1.52099  | -781.524986 |
| -10.31976 | -781.597754 | -4.34414 | -781.575299 | 1.62957  | -781.527338 |
| -10.21111 | -781.597686 | -4.23549 | -781.573678 | 1.73809  | -781.529216 |
| -10.10246 | -781.597616 | -4.12683 | -781.571962 | 1.84653  | -781.530667 |
| -9.99381  | -781.597543 | -4.01818 | -781.570149 | 1.95481  | -781.53176  |
| -9.88516  | -781.597468 | -3.90953 | -781.568242 | 2.06291  | -781.532583 |
| -9.77651  | -781.597389 | -3.80087 | -781.566241 | 2.17101  | -781.533323 |
| -9.66786  | -781.597308 | -3.69222 | -781.56415  | 2.2793   | -781.533779 |
| -9.55921  | -781.597223 | -3.58357 | -781.561973 | 2.38778  | -781.534273 |
| -9.45056  | -781.597135 | -3.47492 | -781.559719 | 2.49636  | -781.534733 |
| -9.34192  | -781.597043 | -3.36627 | -781.557398 | 2.60497  | -781.535165 |
| -9.23327  | -781.596948 | -3.25762 | -781.555025 | 2.7136   | -781.535571 |
| -9.12463  | -781.596848 | -3.14898 | -781.552616 | 2.82223  | -781.535951 |
| -9.01598  | -781.596744 | -3.04033 | -781.550193 | 2.93087  | -781.536307 |
| -8.90734  | -781.596635 | -2.93169 | -781.547786 | 3.0395   | -781.536637 |
| -8.79869  | -781.596521 | -2.82305 | -781.545431 | 3.14814  | -781.536945 |
| -8.69005  | -781.596403 | -2.71441 | -781.543173 | 3.25677  | -781.537227 |
| -8.5814   | -781.59628  | -2.60578 | -781.541054 | 3.36539  | -781.537486 |
| -8.47276  | -781.596151 | -2.49718 | -781.53911  | 3.47401  | -781.537721 |
| -8.36411  | -781.596018 | -2.38863 | -781.537355 | 3.58263  | -781.537933 |
| -8.25546  | -781.595879 | -2.28016 | -781.535772 | 3.69124  | -781.538123 |
| -8.14682  | -781.595734 | -2.17178 | -781.534298 | 3.79984  | -781.538293 |

|          |             |          |                  |         |             |
|----------|-------------|----------|------------------|---------|-------------|
| -8.03818 | -781.595583 | -2.06341 | -781.532844      | 3.90842 | -781.538443 |
| -7.92953 | -781.595425 | -1.955   | -781.531306      | 4.01699 | -781.538576 |
| -7.82089 | -781.59526  | -1.84652 | -781.529598      | 4.12555 | -781.538694 |
| -7.71225 | -781.595087 | -1.738   | -781.527649      | 4.2341  | -781.538798 |
| -7.6036  | -781.594905 | -1.62946 | -781.525404      | 4.34265 | -781.538892 |
| -7.49496 | -781.594712 | -1.52089 | -781.522813      | 4.45122 | -781.538977 |
| -7.38632 | -781.594507 | -1.4123  | -781.519835      | 4.5598  | -781.539054 |
| -7.27768 | -781.594288 | -1.30369 | -781.516439      | 4.6684  | -781.539126 |
| -7.16904 | -781.594055 | -1.19507 | -781.512615      | 4.77701 | -781.539192 |
| -7.0604  | -781.593804 | -1.08644 | -781.508362      | 4.88563 | -781.539255 |
| -6.95176 | -781.593536 | -0.9778  | -781.503707      | 4.99426 | -781.539313 |
| -6.84311 | -781.593248 | -0.86916 | -781.498702      | 5.10289 | -781.539368 |
| -6.73447 | -781.592939 | -0.76051 | -781.493429      | 5.21153 | -781.53942  |
| -6.62582 | -781.592607 | -0.65187 | -781.488018      | 5.32017 | -781.53947  |
| -6.51717 | -781.592252 | -0.54322 | -781.482655      | 5.42882 | -781.539516 |
| -6.40853 | -781.59187  | -0.43458 | -781.477593      | 5.53747 | -781.53956  |
| -6.29988 | -781.591459 | -0.32593 | -781.473163      | 5.64612 | -781.539602 |
| -6.19123 | -781.591016 | -0.21729 | -781.469721      | 5.75477 | -781.539642 |
| -6.08258 | -781.590538 | -0.10866 | -781.467556      | 5.86342 | -781.539679 |
| -5.97393 | -781.590023 | <b>0</b> | <b>-781.4668</b> | 5.97207 | -781.539713 |
| -5.86528 | -781.589466 | 0.10867  | -781.467574      | 6.08073 | -781.539745 |
| -5.75663 | -781.588865 | 0.2173   | -781.469843      | 6.18938 | -781.539775 |
| -5.64798 | -781.588214 | 0.32594  | -781.47349       | 6.29804 | -781.539802 |
| -5.53933 | -781.587513 | 0.43458  | -781.478186      | 6.40669 | -781.539827 |
| -5.43067 | -781.586757 | 0.54323  | -781.483531      | 6.51534 | -781.53985  |
| -5.32202 | -781.585942 | 0.65188  | -781.489178      | 6.624   | -781.53987  |
| -5.21337 | -781.585063 | 0.76053  | -781.494865      | 6.73265 | -781.539888 |
| -5.10471 | -781.584117 | 0.86918  | -781.500394      | 6.8413  | -781.539904 |
| -4.99606 | -781.583102 | 0.97783  | -781.505632      |         |             |

TS2-8\_A1\_Im3\_1-->Pw5

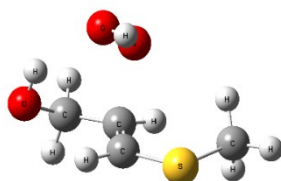

| Method                 | Ee          | E+ZPE       | $\Delta H$                     | $\Delta G$       |           |           |
|------------------------|-------------|-------------|--------------------------------|------------------|-----------|-----------|
| M06-2X/GD3/cc-pVTZ     | -781.50962  | -781.376534 | -781.365453                    | -781.413079      |           |           |
| M06-2X/DG3/aug-cc-pVTZ | -781.517062 | -781.384213 | -781.373057                    | -781.420977      |           |           |
| MN15/cc-pVTZ           | -781.143219 | -781.010838 | -780.999755                    | -781.047143      |           |           |
| MN15/aug-cc-pVTZ       | -781.154927 | -781.022889 | -781.011731                    | -781.059349      |           |           |
| Coordinates (xyz)      |             |             | Vibrations (cm <sup>-1</sup> ) |                  |           |           |
| C                      | -0.005016   | 0.013342    | 0.028799                       | <b>485.0489i</b> | 867.6214  | 1504.4489 |
| C                      | 0.012792    | -0.050533   | 1.534197                       | 41.5289          | 927.2461  | 1560.7002 |
| C                      | 1.195521    | -0.032286   | 2.212832                       | 85.7821          | 959.6841  | 3053.9731 |
| S                      | 1.420516    | -0.083849   | 3.915921                       | 121.0534         | 973.5407  | 3076.6827 |
| C                      | -0.272655   | -0.020461   | 4.531356                       | 136.0715         | 996.0002  | 3091.293  |
| H                      | 0.067131    | 1.050737    | -0.304348                      | 172.0405         | 1004.1397 | 3164.1416 |
| H                      | -0.960423   | -0.385993   | -0.320073                      | 235.3649         | 1062.0843 | 3180.7653 |
| H                      | 2.123255    | -0.12464    | 1.66173                        | 249.182          | 1143.2914 | 3196.4495 |
| H                      | 0.942833    | -3.00388    | 2.246432                       | 256.0569         | 1229.0206 | 3207.4265 |
| H                      | -0.211931   | -0.122292   | 5.611162                       | 286.5473         | 1256.5394 | 3776.4374 |
| H                      | -0.73174    | 0.933941    | 4.283403                       | 352.1158         | 1285.4126 | 3812.6107 |
| H                      | -0.846712   | -0.842331   | 4.109451                       | 421.9236         | 1350.4542 |           |
| H                      | 1.043289    | -1.585809   | -0.235504                      | 435.8903         | 1390.9577 |           |
| O                      | 1.080291    | -0.673391   | -0.547424                      | 497.0689         | 1401.3953 |           |
| H                      | -0.910986   | 0.201547    | 2.037658                       | 622.2289         | 1433.2245 |           |
| O                      | -0.537813   | -1.990397   | 1.730435                       | 733.0114         | 1473.1261 |           |
| O                      | 0.50355     | -2.828703   | 1.40321                        | 796.3483         | 1493.0393 |           |

| Pw5                                                                               |           |           |                                |             |             |             |
|-----------------------------------------------------------------------------------|-----------|-----------|--------------------------------|-------------|-------------|-------------|
| 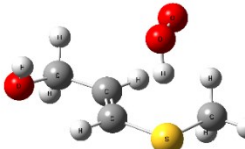 |           |           |                                |             |             |             |
| Method                                                                            |           |           | Ee                             | E+ZPE       | $\Delta H$  | $\Delta G$  |
| M06-2X/GD3/cc-pVTZ                                                                |           |           | -781.527521                    | -781.395027 | -781.382506 | -781.434743 |
| M06-2X/DG3/aug-cc-pVTZ                                                            |           |           | -781.534965                    | -781.402774 | -781.390177 | -781.442781 |
| MN15/cc-pVTZ                                                                      |           |           | -781.159256                    | -781.027396 | -781.014821 | -781.067012 |
| MN15/aug-cc-pVTZ                                                                  |           |           | -781.17071                     | -781.039141 | -781.026532 | -781.078903 |
| Coordinates (xyz)                                                                 |           |           | Vibrations (cm <sup>-1</sup> ) |             |             |             |
| C                                                                                 | 0.002142  | 0.137303  | -0.049444                      | 27.2712     | 853.1507    | 1517.5112   |
| C                                                                                 | 0.010139  | 0.127418  | 1.453247                       | 46.6093     | 957.2895    | 1715.5267   |
| C                                                                                 | 1.11342   | -0.026679 | 2.170997                       | 60.104      | 980.9165    | 3033.2117   |
| S                                                                                 | 1.2584    | -0.081431 | 3.920615                       | 102.9852    | 986.9346    | 3076.5158   |
| C                                                                                 | -0.441028 | 0.208062  | 4.448975                       | 114.7845    | 995.7356    | 3086.0793   |
| H                                                                                 | -0.234551 | 1.140262  | -0.41003                       | 171.6724    | 1002.9893   | 3166.501    |
| H                                                                                 | -0.797317 | -0.521928 | -0.404267                      | 193.0902    | 1149.3868   | 3179.1762   |
| H                                                                                 | 2.073895  | -0.133374 | 1.68137                        | 199.1465    | 1212.2267   | 3195.495    |
| H                                                                                 | 1.119573  | -2.344863 | 3.711359                       | 231.5422    | 1250.9031   | 3197.0134   |
| H                                                                                 | -0.432162 | 0.184665  | 5.535301                       | 237.6716    | 1274.3525   | 3395.7424   |
| H                                                                                 | -0.77091  | 1.187418  | 4.108902                       | 267.6672    | 1321.9643   | 3865.4584   |
| H                                                                                 | -1.091345 | -0.575889 | 4.06921                        | 349.42      | 1349.465    |             |
| H                                                                                 | 1.419104  | -1.130861 | -0.443324                      | 406.9949    | 1384.6135   |             |
| O                                                                                 | 1.237792  | -0.206353 | -0.63331                       | 486.5364    | 1410.8334   |             |
| H                                                                                 | -0.957275 | 0.243792  | 1.926832                       | 596.2564    | 1471.8248   |             |
| O                                                                                 | -0.530262 | -2.905578 | 3.161868                       | 733.4309    | 1492.043    |             |
| O                                                                                 | 0.720274  | -3.194785 | 3.408395                       | 773.6455    | 1503.3247   |             |

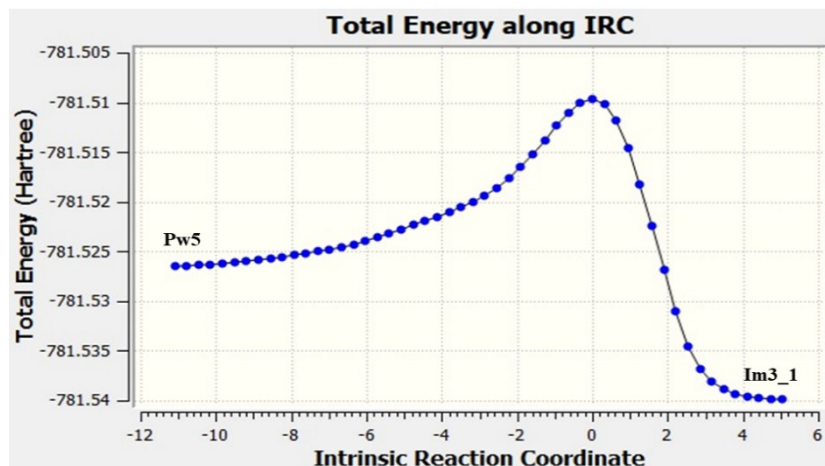

| Rx Coord  | Energy      | Rx Coord | Energy           | Rx Coord | Energy      |
|-----------|-------------|----------|------------------|----------|-------------|
| -11.09248 | -781.526468 | -5.39292 | -781.523181      | 0.31751  | -781.510133 |
| -10.77569 | -781.526425 | -5.07597 | -781.52278       | 0.63492  | -781.511787 |
| -10.45872 | -781.526371 | -4.75909 | -781.522362      | 0.95239  | -781.514563 |
| -10.14139 | -781.526303 | -4.44185 | -781.521961      | 1.26983  | -781.51822  |
| -9.82401  | -781.526221 | -4.1249  | -781.521544      | 1.5873   | -781.522444 |
| -9.50657  | -781.526123 | -3.8077  | -781.521097      | 1.90475  | -781.526859 |
| -9.18921  | -781.526011 | -3.49061 | -781.520603      | 2.22215  | -781.531044 |
| -8.87195  | -781.525883 | -3.17339 | -781.520031      | 2.5393   | -781.534519 |
| -8.55476  | -781.525741 | -2.85616 | -781.519369      | 2.85466  | -781.536884 |
| -8.23819  | -781.525581 | -2.5389  | -781.518584      | 3.16501  | -781.538168 |
| -7.92143  | -781.525403 | -2.2216  | -781.51764       | 3.4796   | -781.538917 |
| -7.60711  | -781.52521  | -1.90424 | -781.516517      | 3.7937   | -781.539353 |
| -7.29121  | -781.525001 | -1.58689 | -781.515225      | 4.10553  | -781.539602 |
| -6.97557  | -781.524792 | -1.2695  | -781.513792      | 4.41889  | -781.53974  |
| -6.65955  | -781.524551 | -0.95217 | -781.512344      | 4.73187  | -781.539825 |
| -6.34312  | -781.524274 | -0.63475 | -781.51102       | 5.0466   | -781.539879 |
| -6.02624  | -781.523951 | -0.31743 | -781.510025      |          |             |
| -5.70977  | -781.523586 | <b>0</b> | <b>-781.5096</b> |          |             |

TS3-1\_A2\_Im1--> A2\_Im1\_1

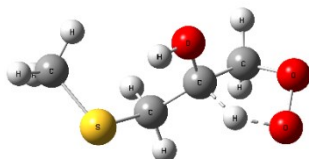

| Method                 |           | Ee          | E+ZPE                          | $\Delta H$        | $\Delta G$  |           |
|------------------------|-----------|-------------|--------------------------------|-------------------|-------------|-----------|
| M06-2X/GD3/cc-pVTZ     |           | -781.49733  | -781.366957                    | -781.356747       | -781.402738 |           |
| M06-2X/DG3/aug-cc-pVTZ |           | -781.504795 | -781.3746                      | -781.364338       | -781.410627 |           |
| MN15/cc-pVTZ           |           | -781.131803 | -781.002209                    | -780.991965       | -781.037964 |           |
| MN15/aug-cc-pVTZ       |           | -781.143373 | -781.013987                    | -781.003707       | -781.049885 |           |
| Coordinates (xyz)      |           |             | Vibrations (cm <sup>-1</sup> ) |                   |             |           |
| C                      | -0.054868 | 0.012425    | -0.039009                      | <b>2098.2061i</b> | 930.1748    | 1484.7381 |
| C                      | -0.080291 | 0.024436    | 1.49051                        | 46.1693           | 973.0946    | 1491.5586 |
| C                      | 1.261742  | 0.021051    | 2.192241                       | 66.9123           | 981.8075    | 1747.3744 |
| S                      | 1.128264  | -0.123159   | 3.998699                       | 112.0052          | 999.533     | 3049.9575 |
| C                      | 1.429134  | -1.901219   | 4.187809                       | 162.9038          | 1031.1448   | 3054.871  |
| H                      | 0.922149  | 0.361099    | -0.385509                      | 205.5078          | 1071.4598   | 3074.8089 |
| H                      | -0.299179 | -0.961271   | -0.461503                      | 252.3785          | 1082.3164   | 3130.3308 |
| H                      | -0.537713 | 1.2489      | 1.432372                       | 285.5738          | 1195.2936   | 3140.4124 |
| H                      | 1.793821  | 0.941617    | 1.958227                       | 343.129           | 1219.5589   | 3159.3377 |
| H                      | 1.873322  | -0.814032   | 1.839344                       | 368.6776          | 1254.1437   | 3172.6105 |
| H                      | 1.304108  | -2.130793   | 5.242973                       | 459.2721          | 1272.4682   | 3721.9887 |
| H                      | 0.718628  | -2.484319   | 3.606531                       | 577.0718          | 1328.4055   |           |
| H                      | 2.445597  | -2.144253   | 3.88755                        | 594.9581          | 1355.8126   |           |
| O                      | -1.011699 | -0.843913   | 1.983344                       | 700.9629          | 1368.4361   |           |
| H                      | -0.963698 | -0.813419   | 2.951297                       | 725.5006          | 1392.1674   |           |
| O                      | -1.068302 | 0.917396    | -0.416311                      | 777.7182          | 1455.1203   |           |
| O                      | -0.851289 | 2.005131    | 0.423801                       | 856.2422          | 1475.1822   |           |



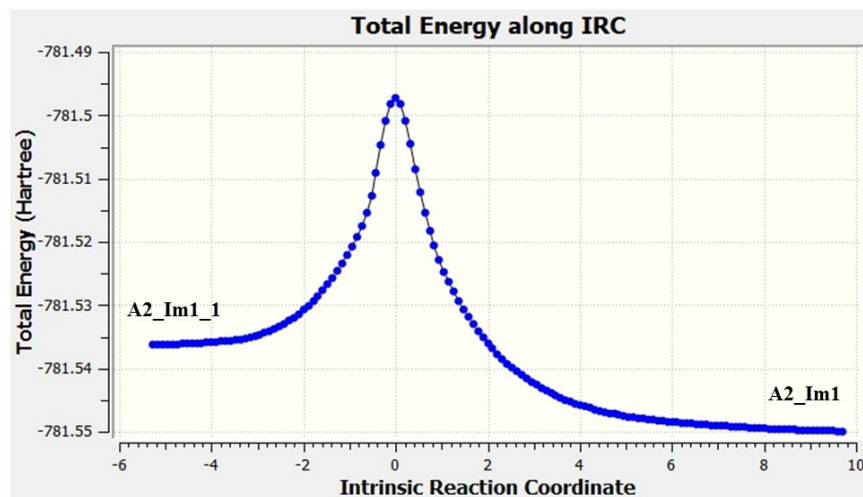

| Rx Coord | Energy      | Rx Coord | Energy           | Rx Coord | Energy      |
|----------|-------------|----------|------------------|----------|-------------|
| -5.2676  | -781.536286 | -0.21088 | -781.500934      | 4.8484   | -781.547366 |
| -5.16229 | -781.536271 | -0.10546 | -781.498269      | 4.95384  | -781.547507 |
| -5.05694 | -781.536251 | <b>0</b> | <b>-781.4973</b> | 5.05927  | -781.547637 |
| -4.95154 | -781.536228 | 0.10545  | -781.498246      | 5.1647   | -781.547758 |
| -4.84613 | -781.536201 | 0.21085  | -781.500817      | 5.27012  | -781.547871 |
| -4.74071 | -781.53617  | 0.31623  | -781.504512      | 5.37555  | -781.547976 |
| -4.63528 | -781.536135 | 0.42154  | -781.508507      | 5.48097  | -781.548074 |
| -4.52984 | -781.536097 | 0.52669  | -781.512208      | 5.58639  | -781.548166 |
| -4.42441 | -781.536056 | 0.63183  | -781.515414      | 5.69181  | -781.548252 |
| -4.31898 | -781.536012 | 0.7371   | -781.518214      | 5.79722  | -781.548333 |
| -4.21355 | -781.535965 | 0.84241  | -781.520662      | 5.90264  | -781.54841  |
| -4.10815 | -781.535917 | 0.94771  | -781.522808      | 6.00806  | -781.548483 |
| -4.00279 | -781.535866 | 1.05302  | -781.524701      | 6.11348  | -781.548553 |
| -3.89749 | -781.535812 | 1.15833  | -781.526392      | 6.2189   | -781.54862  |
| -3.79226 | -781.535754 | 1.26368  | -781.527926      | 6.32433  | -781.548685 |
| -3.68709 | -781.535688 | 1.36906  | -781.529337      | 6.42976  | -781.548748 |
| -3.5819  | -781.53561  | 1.47447  | -781.530647      | 6.53519  | -781.548808 |
| -3.47663 | -781.535516 | 1.57989  | -781.531871      | 6.64063  | -781.548867 |
| -3.3713  | -781.535402 | 1.68532  | -781.533015      | 6.74606  | -781.548924 |
| -3.26593 | -781.535264 | 1.79076  | -781.534086      | 6.8515   | -781.54898  |
| -3.16053 | -781.535097 | 1.89619  | -781.535089      | 6.95694  | -781.549034 |
| -3.05512 | -781.534901 | 2.00163  | -781.536027      | 7.06238  | -781.549086 |
| -2.9497  | -781.53467  | 2.10707  | -781.536904      | 7.16782  | -781.549137 |
| -2.84427 | -781.534404 | 2.2125   | -781.537725      | 7.27326  | -781.549186 |
| -2.73884 | -781.534101 | 2.31794  | -781.538491      | 7.3787   | -781.549234 |
| -2.63341 | -781.53376  | 2.42337  | -781.539208      | 7.48415  | -781.549281 |
| -2.52797 | -781.533374 | 2.5288   | -781.539878      | 7.58959  | -781.549326 |

|          |             |         |             |         |             |
|----------|-------------|---------|-------------|---------|-------------|
| -2.42254 | -781.532947 | 2.63424 | -781.540503 | 7.69503 | -781.54937  |
| -2.3171  | -781.532471 | 2.73967 | -781.541088 | 7.80048 | -781.549412 |
| -2.21167 | -781.531949 | 2.8451  | -781.541636 | 7.90592 | -781.549453 |
| -2.10622 | -781.531374 | 2.95054 | -781.542149 | 8.01137 | -781.549492 |
| -2.00079 | -781.530747 | 3.05597 | -781.542629 | 8.11681 | -781.54953  |
| -1.89535 | -781.530063 | 3.16141 | -781.54308  | 8.22226 | -781.549566 |
| -1.78991 | -781.529322 | 3.26684 | -781.543502 | 8.3277  | -781.549601 |
| -1.68447 | -781.52852  | 3.37228 | -781.543898 | 8.43315 | -781.549635 |
| -1.57903 | -781.527652 | 3.47771 | -781.544268 | 8.53859 | -781.549667 |
| -1.47358 | -781.526711 | 3.58315 | -781.544614 | 8.64404 | -781.549698 |
| -1.36815 | -781.525693 | 3.68859 | -781.544938 | 8.74948 | -781.549727 |
| -1.26271 | -781.524593 | 3.79403 | -781.545242 | 8.85493 | -781.549755 |
| -1.15728 | -781.523404 | 3.89946 | -781.545526 | 8.96037 | -781.549782 |
| -1.05187 | -781.522115 | 4.0049  | -781.545792 | 9.06582 | -781.549807 |
| -0.94648 | -781.520713 | 4.11034 | -781.54604  | 9.17126 | -781.549831 |
| -0.84115 | -781.519176 | 4.21578 | -781.546272 | 9.27671 | -781.549853 |
| -0.73593 | -781.517464 | 4.32122 | -781.546488 | 9.38215 | -781.549874 |
| -0.6312  | -781.515429 | 4.42666 | -781.54669  | 9.4876  | -781.549894 |
| -0.52691 | -781.512769 | 4.53209 | -781.546878 | 9.59305 | -781.549912 |
| -0.42172 | -781.509041 | 4.63753 | -781.547053 | 9.6985  | -781.549928 |
| -0.31631 | -781.504799 | 4.74297 | -781.547215 |         |             |

TS3-2\_A2\_Im1--> A2\_Im1\_2

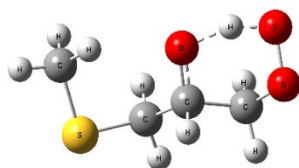

| Method                 |           |           |           |                                |           |           | Ee          | E+ZPE       | $\Delta H$  | $\Delta G$  |
|------------------------|-----------|-----------|-----------|--------------------------------|-----------|-----------|-------------|-------------|-------------|-------------|
| M06-2X/GD3/cc-pVTZ     |           |           |           |                                |           |           | -781.513527 | -781.383692 | -781.373856 | -781.418871 |
| M06-2X/DG3/aug-cc-pVTZ |           |           |           |                                |           |           | -781.520387 | -781.390684 | -781.38084  | -781.425862 |
| MN15/cc-pVTZ           |           |           |           |                                |           |           | -781.146454 | -781.017531 | -781.007586 | -781.052862 |
| MN15/aug-cc-pVTZ       |           |           |           |                                |           |           | -781.157379 | -781.02868  | -781.018728 | -781.064023 |
| Coordinates (xyz)      |           |           |           | Vibrations (cm <sup>-1</sup> ) |           |           |             |             |             |             |
| C                      | 0.006893  | 0.003338  | -0.000584 | <b>1304.3605i</b>              | 915.8753  | 1475.4207 |             |             |             |             |
| C                      | -0.010996 | -0.002387 | 1.612123  | 63.8718                        | 942.4198  | 1479.6057 |             |             |             |             |
| C                      | 1.472327  | -0.008163 | 2.028975  | 92.2673                        | 977.449   | 1832.3439 |             |             |             |             |
| S                      | 1.697039  | 0.432725  | 3.75772   | 115.234                        | 997.3366  | 3016.8922 |             |             |             |             |
| C                      | 0.941754  | -1.004439 | 4.544962  | 182.1355                       | 1028.9733 | 3068.6605 |             |             |             |             |
| H                      | 0.352131  | 0.971417  | -0.355114 | 227.8081                       | 1066.0606 | 3072.4773 |             |             |             |             |
| H                      | 0.638841  | -0.826104 | -0.320604 | 239.0816                       | 1160.8862 | 3077.5091 |             |             |             |             |
| H                      | -0.498484 | 0.93338   | 1.91501   | 314.0897                       | 1178.3361 | 3135.2686 |             |             |             |             |
| H                      | 2.027885  | 0.736773  | 1.459035  | 386.2451                       | 1211.5116 | 3153.3739 |             |             |             |             |
| H                      | 1.885363  | -0.997087 | 1.828784  | 472.1253                       | 1246.3411 | 3171.483  |             |             |             |             |
| H                      | 1.031749  | -0.855824 | 5.618105  | 508.4979                       | 1278.7869 | 3174.07   |             |             |             |             |
| H                      | -0.107314 | -1.082163 | 4.265826  | 573.5548                       | 1301.2057 |           |             |             |             |             |
| H                      | 1.464373  | -1.913778 | 4.25682   | 711.8299                       | 1322.8771 |           |             |             |             |             |
| O                      | -0.677504 | -1.098802 | 2.003012  | 726.518                        | 1359.1506 |           |             |             |             |             |
| H                      | -1.371912 | -1.475187 | 0.9647    | 733.8975                       | 1386.5989 |           |             |             |             |             |
| O                      | -1.294006 | -0.162072 | -0.415703 | 791.7049                       | 1440.2213 |           |             |             |             |             |
| O                      | -1.688529 | -1.439786 | -0.09393  | 857.9316                       | 1465.3246 |           |             |             |             |             |

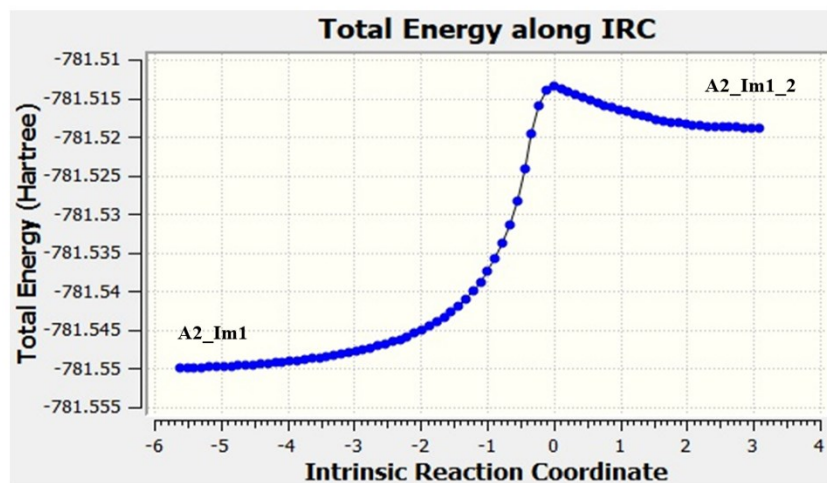

| Rx Coord | Energy      | Rx Coord | Energy           | Rx Coord | Energy      |
|----------|-------------|----------|------------------|----------|-------------|
| -5.616   | -781.550008 | -2.64099 | -781.547089      | 0.32687  | -781.514535 |
| -5.5058  | -781.549965 | -2.53082 | -781.546823      | 0.43697  | -781.514917 |
| -5.39559 | -781.549921 | -2.42064 | -781.546531      | 0.54714  | -781.515279 |
| -5.28539 | -781.549875 | -2.31047 | -781.546209      | 0.65731  | -781.515617 |
| -5.1752  | -781.549826 | -2.2003  | -781.545852      | 0.7675   | -781.515933 |
| -5.065   | -781.549776 | -2.09012 | -781.545455      | 0.87769  | -781.516233 |
| -4.95481 | -781.549723 | -1.97995 | -781.545013      | 0.98789  | -781.516518 |
| -4.84463 | -781.549667 | -1.86977 | -781.544519      | 1.09809  | -781.516791 |
| -4.73444 | -781.549608 | -1.75959 | -781.543967      | 1.20829  | -781.517053 |
| -4.62426 | -781.549545 | -1.64941 | -781.543348      | 1.31849  | -781.5173   |
| -4.51409 | -781.549479 | -1.53924 | -781.542655      | 1.4287   | -781.517529 |
| -4.40391 | -781.549407 | -1.42908 | -781.541876      | 1.5389   | -781.517738 |
| -4.29374 | -781.549331 | -1.31897 | -781.540994      | 1.64909  | -781.517926 |
| -4.18357 | -781.549248 | -1.20891 | -781.539985      | 1.75928  | -781.518093 |
| -4.0734  | -781.549159 | -1.0989  | -781.538811      | 1.86944  | -781.518238 |
| -3.96322 | -781.549062 | -0.98887 | -781.537422      | 1.97959  | -781.518362 |
| -3.85304 | -781.548958 | -0.87881 | -781.535767      | 2.08971  | -781.518466 |
| -3.74285 | -781.548844 | -0.76876 | -781.53381       | 2.19983  | -781.518551 |
| -3.63266 | -781.548721 | -0.65928 | -781.531419      | 2.30993  | -781.518621 |
| -3.52247 | -781.548589 | -0.55038 | -781.528317      | 2.42     | -781.518678 |
| -3.41228 | -781.548448 | -0.44044 | -781.524083      | 2.53001  | -781.518723 |
| -3.30208 | -781.548295 | -0.33029 | -781.519603      | 2.63994  | -781.518758 |
| -3.19189 | -781.548131 | -0.22011 | -781.516006      | 2.74985  | -781.518788 |
| -3.0817  | -781.547953 | -0.10997 | -781.514026      | 2.85981  | -781.518812 |
| -2.97152 | -781.547762 | <b>0</b> | <b>-781.5135</b> | 2.96988  | -781.518832 |
| -2.86133 | -781.547556 | 0.10913  | -781.513758      | 3.08001  | -781.51885  |
| -2.75116 | -781.547332 | 0.21681  | -781.514137      |          |             |

TS3-3\_A2\_Im2--> A2\_Im2\_1

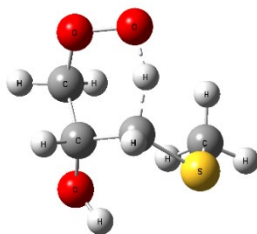

| Method                 |           |           |           | Ee                             | E+ZPE       | $\Delta H$  | $\Delta G$  |
|------------------------|-----------|-----------|-----------|--------------------------------|-------------|-------------|-------------|
| M06-2X/GD3/cc-pVTZ     |           |           |           | -781.511766                    | -781.38131  | -781.371393 | -781.415777 |
| M06-2X/DG3/aug-cc-pVTZ |           |           |           | -781.518745                    | -781.388439 | -781.378491 | -781.42297  |
| MN15/cc-pVTZ           |           |           |           | -781.144343                    | -781.014512 | -781.004639 | -781.048795 |
| MN15/aug-cc-pVTZ       |           |           |           | -781.155603                    | -781.026059 | -781.016137 | -781.060434 |
| Coordinates (xyz)      |           |           |           | Vibrations (cm <sup>-1</sup> ) |             |             |             |
| C                      | 0.068602  | 0.162314  | -0.084998 | <b>1941.9626i</b>              | 920.1433    | 1483.0108   |             |
| C                      | 0.093103  | -0.189648 | 1.414662  | 95.7857                        | 981.0025    | 1500.1459   |             |
| C                      | 1.477302  | 0.057799  | 2.014872  | 115.0601                       | 984.7935    | 1586.1875   |             |
| S                      | 2.565627  | -1.292585 | 2.309794  | 159.042                        | 1005.8091   | 3047.5124   |             |
| C                      | 2.661344  | -2.064275 | 0.674164  | 207.2335                       | 1046.0645   | 3080.8582   |             |
| H                      | 0.602849  | -0.600213 | -0.653692 | 215.9473                       | 1088.9425   | 3086.1674   |             |
| H                      | -0.604349 | 0.485277  | 1.918651  | 249.6137                       | 1128.3789   | 3147.6353   |             |
| H                      | 1.467261  | 0.689195  | 2.899174  | 290.1255                       | 1155.4175   | 3155.7369   |             |
| H                      | 2.006053  | 0.799332  | 1.087057  | 325.7394                       | 1217.2205   | 3173.775    |             |
| H                      | 3.395672  | -2.861218 | 0.756682  | 402.9029                       | 1259.7407   | 3179.0176   |             |
| H                      | 1.697898  | -2.475996 | 0.38676   | 438.8812                       | 1289.575    | 3828.18     |             |
| H                      | 2.997713  | -1.329823 | -0.053495 | 532.0552                       | 1296.7309   |             |             |
| O                      | -0.362797 | -1.520825 | 1.513414  | 596.6535                       | 1341.6659   |             |             |
| H                      | 0.012394  | -1.921413 | 2.304981  | 675.1734                       | 1352.9573   |             |             |
| H                      | -0.957241 | 0.244076  | -0.438783 | 712.5726                       | 1383.834    |             |             |
| O                      | 0.66086   | 1.424874  | -0.273636 | 766.2381                       | 1388.4193   |             |             |
| O                      | 2.018163  | 1.292212  | -0.053221 | 836.3047                       | 1469.539    |             |             |

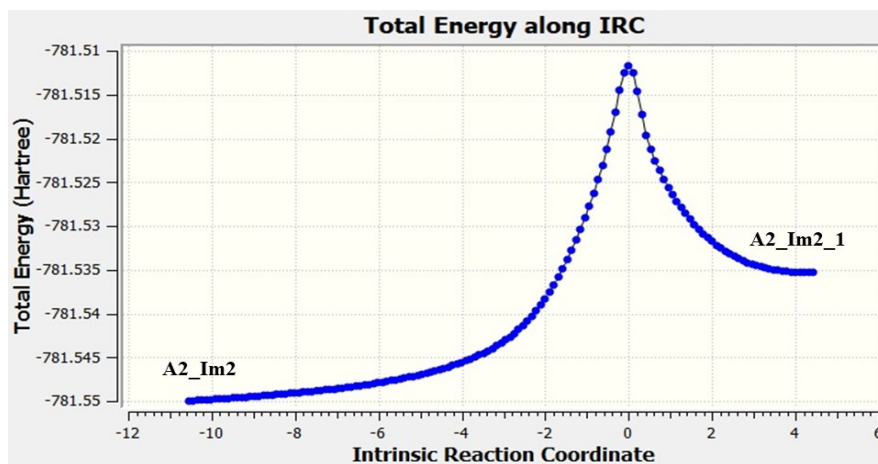

| Rx Coord  | Energy      | Rx Coord | Energy      | Rx Coord | Energy           |
|-----------|-------------|----------|-------------|----------|------------------|
| -10.54955 | -781.549996 | -5.48459 | -781.547476 | -0.42117 | -781.519333      |
| -10.44403 | -781.549964 | -5.37907 | -781.547377 | -0.3163  | -781.517064      |
| -10.33851 | -781.549931 | -5.27355 | -781.547273 | -0.21098 | -781.514551      |
| -10.23299 | -781.549898 | -5.16804 | -781.547165 | -0.10552 | -781.512536      |
| -10.12746 | -781.549864 | -5.06252 | -781.547053 | <b>0</b> | <b>-781.5118</b> |
| -10.02194 | -781.549829 | -4.95701 | -781.546936 | 0.10553  | -781.512535      |
| -9.91642  | -781.549794 | -4.85149 | -781.546814 | 0.21102  | -781.514623      |
| -9.8109   | -781.549759 | -4.74598 | -781.546686 | 0.31646  | -781.517335      |
| -9.70538  | -781.549724 | -4.64047 | -781.546552 | 0.42129  | -781.519656      |
| -9.59986  | -781.549688 | -4.53496 | -781.546412 | 0.52501  | -781.521279      |
| -9.49433  | -781.549651 | -4.42945 | -781.546265 | 0.63022  | -781.522546      |
| -9.38881  | -781.549615 | -4.32394 | -781.54611  | 0.73565  | -781.523664      |
| -9.28329  | -781.549578 | -4.21843 | -781.545947 | 0.8411   | -781.524665      |
| -9.17777  | -781.54954  | -4.11292 | -781.545776 | 0.94656  | -781.525574      |
| -9.07225  | -781.549502 | -4.00741 | -781.545596 | 1.05204  | -781.52641       |
| -8.96673  | -781.549463 | -3.9019  | -781.545405 | 1.15753  | -781.527185      |
| -8.86121  | -781.549424 | -3.7964  | -781.545204 | 1.26303  | -781.527909      |
| -8.75569  | -781.549385 | -3.6909  | -781.544991 | 1.36853  | -781.528586      |
| -8.65017  | -781.549344 | -3.58539 | -781.544764 | 1.47404  | -781.52922       |
| -8.54465  | -781.549303 | -3.47989 | -781.544522 | 1.57955  | -781.529812      |
| -8.43913  | -781.549261 | -3.37439 | -781.544264 | 1.68506  | -781.530364      |
| -8.33361  | -781.549218 | -3.26889 | -781.543988 | 1.79058  | -781.530875      |
| -8.22809  | -781.549174 | -3.16339 | -781.543693 | 1.89609  | -781.531348      |
| -8.12257  | -781.54913  | -3.05789 | -781.543375 | 2.0016   | -781.531785      |
| -8.01706  | -781.549085 | -2.95239 | -781.543032 | 2.10712  | -781.532187      |
| -7.91154  | -781.549038 | -2.84689 | -781.542662 | 2.21263  | -781.532558      |
| -7.80602  | -781.548991 | -2.74139 | -781.54226  | 2.31815  | -781.532898      |
| -7.7005   | -781.548943 | -2.63589 | -781.541825 | 2.42367  | -781.53321       |

|          |             |          |             |         |             |
|----------|-------------|----------|-------------|---------|-------------|
| -7.59498 | -781.548893 | -2.53038 | -781.541352 | 2.52918 | -781.533495 |
| -7.48947 | -781.548842 | -2.42487 | -781.540838 | 2.6347  | -781.533752 |
| -7.38395 | -781.54879  | -2.31937 | -781.54028  | 2.74021 | -781.533985 |
| -7.27843 | -781.548735 | -2.21386 | -781.539675 | 2.84571 | -781.534192 |
| -7.17291 | -781.54868  | -2.10835 | -781.539019 | 2.95122 | -781.534377 |
| -7.06739 | -781.548622 | -2.00283 | -781.538309 | 3.05672 | -781.53454  |
| -6.96187 | -781.548562 | -1.89732 | -781.537541 | 3.16223 | -781.534683 |
| -6.85635 | -781.548501 | -1.79181 | -781.536713 | 3.26773 | -781.534808 |
| -6.75083 | -781.548438 | -1.6863  | -781.53582  | 3.37323 | -781.534915 |
| -6.64531 | -781.548372 | -1.58079 | -781.534863 | 3.47873 | -781.535007 |
| -6.53979 | -781.548304 | -1.47527 | -781.533838 | 3.5842  | -781.535083 |
| -6.43427 | -781.548233 | -1.36976 | -781.532746 | 3.68965 | -781.535145 |
| -6.32875 | -781.54816  | -1.26426 | -781.531586 | 3.79503 | -781.535195 |
| -6.22322 | -781.548084 | -1.15875 | -781.530358 | 3.90032 | -781.535234 |
| -6.1177  | -781.548005 | -1.05326 | -781.529061 | 4.00553 | -781.535265 |
| -6.01218 | -781.547924 | -0.94778 | -781.527692 | 4.11075 | -781.53529  |
| -5.90666 | -781.54784  | -0.84232 | -781.526244 | 4.21608 | -781.535311 |
| -5.80114 | -781.547754 | -0.73687 | -781.524707 | 4.32151 | -781.535329 |
| -5.69562 | -781.547664 | -0.63145 | -781.523066 | 4.427   | -781.535345 |
| -5.5901  | -781.547572 | -0.52611 | -781.521307 |         |             |

TS3-4\_A2\_Im1\_1--> Pw6

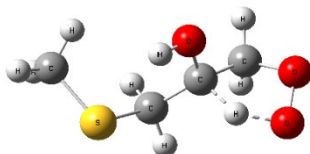

| Method                 |           |           |           | Ee                             | E+ZPE       | $\Delta H$  | $\Delta G$  |
|------------------------|-----------|-----------|-----------|--------------------------------|-------------|-------------|-------------|
| M06-2X/GD3/cc-pVTZ     |           |           |           | -781.443675                    | -781.31445  | -781.303022 | -781.352436 |
| M06-2X/DG3/aug-cc-pVTZ |           |           |           | -781.450671                    | -781.321624 | -781.31018  | -781.359659 |
| MN15/cc-pVTZ           |           |           |           | -781.079426                    | -780.951019 | -780.939275 | -780.989147 |
| MN15/aug-cc-pVTZ       |           |           |           | -781.090369                    | -780.962175 | -780.950436 | -781.000275 |
| Coordinates (xyz)      |           |           |           | Vibrations (cm <sup>-1</sup> ) |             |             |             |
| C                      | 0.065064  | 0.412556  | -0.160924 | <b>180.9258i</b>               | 784.9183    | 1489.6832   |             |
| C                      | -0.118421 | 1.102086  | 2.381339  | 42.4545                        | 869.6275    | 1595.1756   |             |
| C                      | 0.97534   | 0.220857  | 2.940961  | 50.0542                        | 911.8867    | 2996.0313   |             |
| S                      | 2.517738  | 1.046738  | 3.456188  | 73.4437                        | 943.9301    | 3071.4612   |             |
| C                      | 2.104752  | 1.401963  | 5.186869  | 114.76                         | 961.0787    | 3077.2799   |             |
| H                      | -0.503825 | 1.271605  | -0.488716 | 162.4998                       | 982.788     | 3136.8569   |             |
| H                      | 1.033731  | 0.178151  | -0.580048 | 190.8373                       | 1011.3515   | 3141.8599   |             |
| H                      | -1.50958  | 0.250347  | 1.504989  | 223.3591                       | 1160.9497   | 3162.1795   |             |
| H                      | 1.207896  | -0.543918 | 2.201208  | 239.8249                       | 1199.8657   | 3173.8691   |             |
| H                      | 0.552552  | -0.305814 | 3.800212  | 278.2633                       | 1236.8258   | 3210.5687   |             |
| H                      | 2.929817  | 1.974653  | 5.601997  | 315.4857                       | 1255.3399   | 3276.0752   |             |
| H                      | 1.190771  | 1.986607  | 5.260189  | 422.1667                       | 1358.4897   |             |             |
| H                      | 1.997711  | 0.47272   | 5.740935  | 515.8535                       | 1377.7068   |             |             |
| O                      | 0.139374  | 2.363309  | 2.439897  | 609.5142                       | 1402.1672   |             |             |
| H                      | 1.070791  | 2.520833  | 2.754075  | 722.6133                       | 1440.2666   |             |             |
| O                      | -0.622449 | -0.694132 | 0.166767  | 737.0131                       | 1463.4328   |             |             |
| O                      | -1.857913 | -0.316184 | 0.748743  | 778.1434                       | 1477.206    |             |             |



**Pw6**

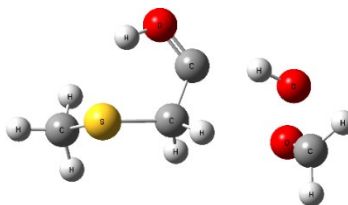

| <b>Pw6</b>               |           |             |              |                                     |             |           |
|--------------------------|-----------|-------------|--------------|-------------------------------------|-------------|-----------|
|                          |           |             |              |                                     |             |           |
| <b>Method</b>            |           | <b>Ee</b>   | <b>E+ZPE</b> | <b>ΔH</b>                           | <b>ΔG</b>   |           |
| M06-2X/GD3/cc-pVTZ       |           | -781.445062 | -781.316183  | -781.303661                         | -781.356108 |           |
| M06-2X/DG3/aug-cc-pVTZ   |           | -781.452155 | -781.323461  | -781.310909                         | -781.363555 |           |
| MN15/cc-pVTZ             |           | -781.090689 | -780.962602  | -780.949892                         | -781.002848 |           |
| MN15/aug-cc-pVTZ         |           | -781.079872 | -780.951528  | -780.938848                         | -780.991607 |           |
| <b>Coordinates (xyz)</b> |           |             |              | <b>Vibrations (cm<sup>-1</sup>)</b> |             |           |
| C                        | 0.415328  | -0.694208   | -0.137275    | 24.4859                             | 793.6784    | 1489.518  |
| C                        | -0.248569 | 0.688736    | 3.03111      | 49.169                              | 861.5773    | 1597.1036 |
| C                        | 1.246208  | 0.753561    | 2.85713      | 69.1464                             | 902.7519    | 3064.339  |
| S                        | 2.164112  | 1.830406    | 4.0009       | 99.4253                             | 964.5069    | 3078.8833 |
| C                        | 2.327937  | 0.680738    | 5.394591     | 103.2736                            | 964.881     | 3088.8481 |
| H                        | -0.420028 | -0.366992   | -0.738093    | 144.7054                            | 983.5195    | 3116.2004 |
| H                        | 1.386413  | -0.898032   | -0.565141    | 170.4005                            | 1029.6341   | 3142.8705 |
| H                        | -1.083414 | -0.60289    | 1.971639     | 207.5431                            | 1160.1547   | 3150.8257 |
| H                        | 1.403389  | 1.108716    | 1.833586     | 221.7294                            | 1199.3507   | 3164.4116 |
| H                        | 1.642053  | -0.262998   | 2.870655     | 266.8619                            | 1243.8123   | 3177.5148 |
| H                        | 2.826496  | 1.217732    | 6.196918     | 302.8813                            | 1254.3461   | 3285.4549 |
| H                        | 1.354005  | 0.342425    | 5.740146     | 305.1511                            | 1359.6762   |           |
| H                        | 2.934536  | -0.171656   | 5.099328     | 511.4805                            | 1374.3024   |           |
| O                        | -0.709495 | 1.526615    | 3.88133      | 618.8                               | 1410.6638   |           |
| H                        | 0.026223  | 2.073432    | 4.281557     | 681.5317                            | 1450.3651   |           |
| O                        | 0.137475  | -1.522748   | 0.89324      | 711.1786                            | 1475.5706   |           |
| O                        | -1.207154 | -1.336986   | 1.302399     | 739.0881                            | 1478.3057   |           |

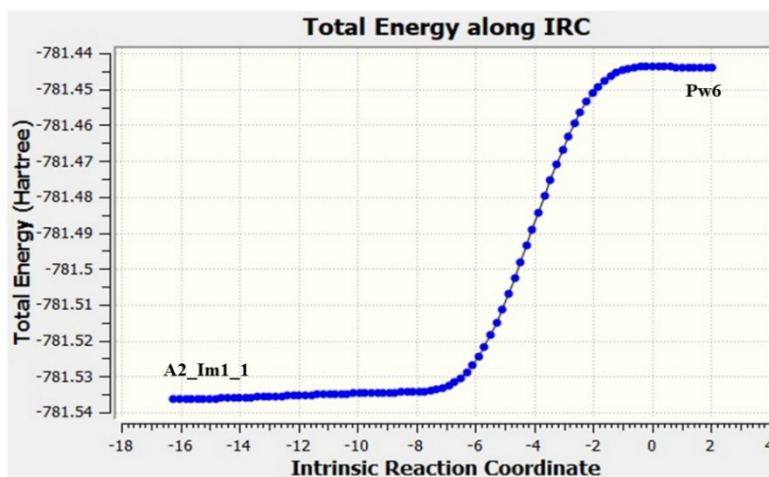

| Rx Coord  | Energy      | Rx Coord | Energy      | Rx Coord | Energy           |
|-----------|-------------|----------|-------------|----------|------------------|
| -16.23216 | -781.536428 | -9.93545 | -781.53472  | -3.65594 | -781.479824      |
| -16.02908 | -781.536397 | -9.73233 | -781.534675 | -3.45282 | -781.475361      |
| -15.82599 | -781.536364 | -9.52922 | -781.534633 | -3.2497  | -781.471055      |
| -15.62288 | -781.536327 | -9.32611 | -781.534591 | -3.04659 | -781.466955      |
| -15.41977 | -781.536287 | -9.12302 | -781.534552 | -2.84347 | -781.463113      |
| -15.21665 | -781.536244 | -8.91992 | -781.534513 | -2.64035 | -781.459582      |
| -15.01353 | -781.536198 | -8.71687 | -781.534475 | -2.43723 | -781.456407      |
| -14.81041 | -781.53615  | -8.51394 | -781.534438 | -2.23412 | -781.453628      |
| -14.60728 | -781.5361   | -8.31174 | -781.5344   | -2.031   | -781.451257      |
| -14.40416 | -781.536047 | -8.1126  | -781.534353 | -1.82789 | -781.449285      |
| -14.20104 | -781.535991 | -7.91262 | -781.534279 | -1.62477 | -781.447684      |
| -13.99792 | -781.535934 | -7.71225 | -781.534155 | -1.42166 | -781.446421      |
| -13.79479 | -781.535874 | -7.51018 | -781.533951 | -1.21855 | -781.44546       |
| -13.59167 | -781.535812 | -7.30873 | -781.533648 | -1.01545 | -781.444766      |
| -13.38854 | -781.535749 | -7.10688 | -781.533218 | -0.81235 | -781.444288      |
| -13.18542 | -781.535684 | -6.90435 | -781.532566 | -0.60927 | -781.443979      |
| -12.98229 | -781.535619 | -6.70162 | -781.531652 | -0.40617 | -781.443794      |
| -12.77917 | -781.535554 | -6.49874 | -781.530424 | -0.20312 | -781.443701      |
| -12.57604 | -781.535488 | -6.29584 | -781.528851 | <b>0</b> | <b>-781.4437</b> |
| -12.37292 | -781.535422 | -6.0929  | -781.526896 | 0.20311  | -781.443695      |
| -12.16979 | -781.535356 | -5.88993 | -781.524539 | 0.40614  | -781.443746      |
| -11.96667 | -781.535291 | -5.68692 | -781.521772 | 0.60924  | -781.443814      |
| -11.76354 | -781.535227 | -5.48387 | -781.518608 | 0.8123   | -781.443888      |
| -11.56042 | -781.535163 | -5.2808  | -781.515074 | 1.01538  | -781.443962      |
| -11.35729 | -781.535101 | -5.07771 | -781.511217 | 1.21841  | -781.44403       |
| -11.15417 | -781.53504  | -4.87461 | -781.507089 | 1.42141  | -781.444088      |
| -10.95105 | -781.534981 | -4.6715  | -781.502749 | 1.6243   | -781.444136      |
| -10.74793 | -781.534924 | -4.46839 | -781.498255 | 1.82703  | -781.444175      |
| -10.5448  | -781.53487  | -4.26528 | -781.493662 | 2.02966  | -781.444206      |
| -10.34168 | -781.534817 | -4.06217 | -781.489024 |          |                  |
| -10.13856 | -781.534767 | -3.85905 | -781.484395 |          |                  |

TS3-5\_P2\_Im1--> P2

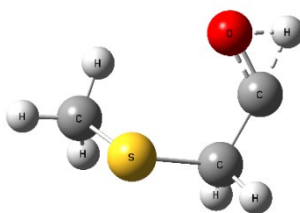

| Method                 | Ee          | E+ZPE       | $\Delta H$  | $\Delta G$                     |           |           |
|------------------------|-------------|-------------|-------------|--------------------------------|-----------|-----------|
| M06-2X/GD3/cc-pVTZ     | -591.18334  | -591.103316 | -591.095738 | -591.133819                    |           |           |
| M06-2X/DG3/aug-cc-pVTZ | -591.187247 | -591.107331 | -591.099736 | -591.137864                    |           |           |
| MN15/cc-pVTZ           | -590.940431 | -590.860689 | -590.853119 | -590.891137                    |           |           |
| MN15/aug-cc-pVTZ       | -590.947207 | -590.867597 | -590.860008 | -590.898089                    |           |           |
| Coordinates (xyz)      |             |             |             | Vibrations (cm <sup>-1</sup> ) |           |           |
| C                      | 0.04427     | -0.009687   | 0.007629    | <b>2053.9103i</b>              | 923.5568  | 3061.4044 |
| C                      | 0.016115    | 0.005458    | 1.502655    | 95.0861                        | 974.7935  | 3075.8847 |
| S                      | 1.617259    | 0.008869    | 2.341561    | 151.9526                       | 993.8657  | 3109.3146 |
| C                      | 2.152751    | 1.692591    | 1.950127    | 163.7302                       | 1153.5579 | 3159.2469 |
| H                      | -0.528953   | -0.886127   | 1.820121    | 216.1639                       | 1257.5516 | 3177.4034 |
| H                      | -0.596485   | 0.856524    | 1.812161    | 274.7561                       | 1350.0731 |           |
| H                      | 3.077142    | 1.860928    | 2.496811    | 516.463                        | 1389.2166 |           |
| H                      | 2.338443    | 1.80275     | 0.885895    | 629.692                        | 1470.7117 |           |
| H                      | 1.409435    | 2.413865    | 2.284649    | 729.6332                       | 1492.5705 |           |
| O                      | 1.182922    | -0.007167   | -0.595113   | 766.4823                       | 1498.7389 |           |
| H                      | 0.19931     | 0.00004     | -1.238112   | 777.9019                       | 2669.4671 |           |

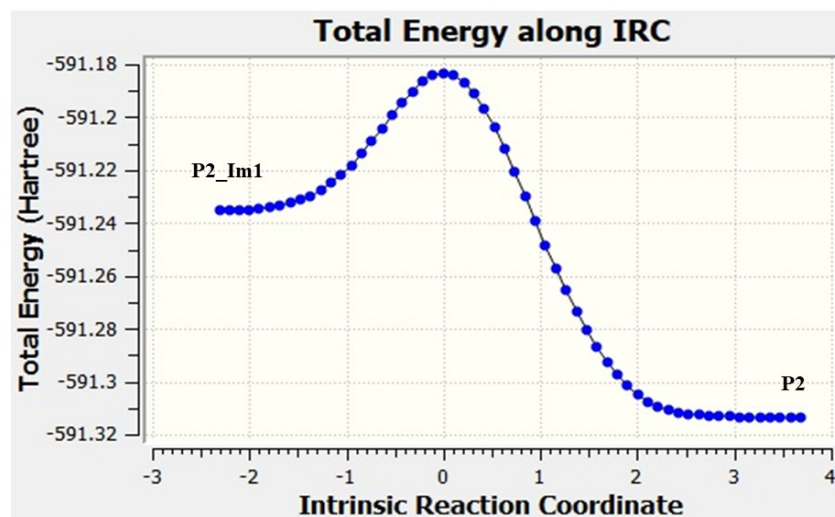

| Rx Coord | Energy      | Rx Coord | Energy           | Rx Coord | Energy      |
|----------|-------------|----------|------------------|----------|-------------|
| -2.31053 | -591.23519  | -0.21102 | -591.186632      | 1.89897  | -591.301609 |
| -2.20655 | -591.235169 | -0.10553 | -591.184201      | 2.00442  | -591.304972 |
| -2.10754 | -591.235101 | <b>0</b> | <b>-591.1833</b> | 2.10982  | -591.307602 |
| -2.0027  | -591.234917 | 0.10553  | -591.184223      | 2.21512  | -591.309551 |
| -1.89736 | -591.234581 | 0.21102  | -591.1868        | 2.32016  | -591.310898 |
| -1.79199 | -591.234079 | 0.31652  | -591.190975      | 2.42481  | -591.311778 |
| -1.68671 | -591.233392 | 0.42202  | -591.196669      | 2.52942  | -591.312344 |
| -1.58156 | -591.232484 | 0.52752  | -591.203729      | 2.63411  | -591.312713 |
| -1.47642 | -591.231279 | 0.63303  | -591.211868      | 2.73859  | -591.312955 |
| -1.37119 | -591.229689 | 0.73853  | -591.220724      | 2.84328  | -591.313127 |
| -1.26584 | -591.227615 | 0.84404  | -591.22995       | 2.94851  | -591.313262 |
| -1.16043 | -591.225003 | 0.94954  | -591.239262      | 3.05393  | -591.313371 |
| -1.05497 | -591.221825 | 1.05504  | -591.248424      | 3.15936  | -591.313458 |
| -0.94948 | -591.2181   | 1.16055  | -591.257256      | 3.26472  | -591.313524 |
| -0.84399 | -591.213884 | 1.26605  | -591.265612      | 3.36996  | -591.313573 |
| -0.73849 | -591.209271 | 1.37155  | -591.273391      | 3.47501  | -591.313608 |
| -0.63299 | -591.204397 | 1.47704  | -591.280514      | 3.57995  | -591.313632 |
| -0.5275  | -591.199446 | 1.58253  | -591.286926      | 3.68509  | -591.313649 |
| -0.42201 | -591.194635 | 1.68802  | -591.29259       |          |             |
| -0.31651 | -591.190249 | 1.7935   | -591.297485      |          |             |

TS3-6\_A2\_Im1\_2--> Pw7

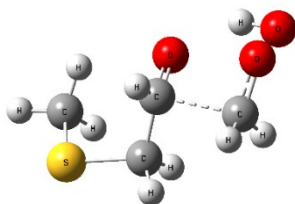

| Method                 | Ee          | E+ZPE       | $\Delta H$                     | $\Delta G$       |           |           |
|------------------------|-------------|-------------|--------------------------------|------------------|-----------|-----------|
| M06-2X/GD3/cc-pVTZ     | -781.508278 | -781.376897 | -781.365907                    | -781.413858      |           |           |
| M06-2X/DG3/aug-cc-pVTZ | -781.515504 | -781.384211 | -781.373219                    | -781.421155      |           |           |
| MN15/cc-pVTZ           | -781.14016  | -781.009401 | -780.998448                    | -781.046279      |           |           |
| MN15/aug-cc-pVTZ       | -781.151133 | -781.020634 | -781.009664                    | -781.057543      |           |           |
| Coordinates (xyz)      |             |             | Vibrations (cm <sup>-1</sup> ) |                  |           |           |
| C                      | -0.009495   | 0.032905    | 0.035301                       | <b>307.0946i</b> | 877.5953  | 1500.3737 |
| C                      | -0.008876   | -0.003603   | 2.193527                       | 49.9467          | 926.6735  | 1613.5532 |
| C                      | 1.478753    | -0.037642   | 2.437488                       | 61.8852          | 964.936   | 2994.6446 |
| S                      | 1.789436    | 0.435026    | 4.163535                       | 93.4356          | 982.4912  | 3075.2987 |
| C                      | 1.080262    | -1.000724   | 5.001694                       | 138.8585         | 986.216   | 3083.62   |
| H                      | 0.324482    | 1.031647    | -0.2175                        | 190.5252         | 1023.0127 | 3120.0373 |
| H                      | 0.629836    | -0.824184   | -0.141863                      | 200.6341         | 1058.3877 | 3149.611  |
| H                      | -0.4583     | 1.002062    | 2.201933                       | 237.0064         | 1200.8151 | 3162.4599 |
| H                      | 2.002916    | 0.700336    | 1.832468                       | 275.1756         | 1215.2993 | 3173.8409 |
| H                      | 1.873558    | -1.034123   | 2.242382                       | 293.0871         | 1240.5836 | 3254.7724 |
| H                      | 1.210493    | -0.829143   | 6.067332                       | 422.232          | 1263.5425 | 3498.3148 |
| H                      | 0.022992    | -1.101936   | 4.770931                       | 493.05           | 1358.7791 |           |
| H                      | 1.609791    | -1.906081   | 4.71331                        | 519.8134         | 1383.2465 |           |
| O                      | -0.716576   | -0.997038   | 2.413968                       | 579.5776         | 1446.2448 |           |
| H                      | -1.632111   | -1.534126   | 0.946403                       | 638.5231         | 1461.4105 |           |
| O                      | -1.310221   | -0.12712    | -0.232782                      | 710.7359         | 1468.4674 |           |
| O                      | -1.673355   | -1.479358   | -0.033909                      | 756.1754         | 1485.9976 |           |

Pw7

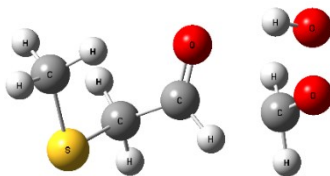

| Method                 | Ee          |           | E+ZPE                          | $\Delta H$  | $\Delta G$  |           |
|------------------------|-------------|-----------|--------------------------------|-------------|-------------|-----------|
| M06-2X/GD3/cc-pVTZ     | -781.513851 |           | -781.383506                    | -781.371604 | -781.421779 |           |
| M06-2X/DG3/aug-cc-pVTZ | -781.521977 |           | -781.391789                    | -781.379018 | -781.432351 |           |
| MN15/cc-pVTZ           | -781.146497 |           | -781.017136                    | -781.004091 | -781.058739 |           |
| MN15/aug-cc-pVTZ       | -781.157261 |           | -781.028198                    | -781.015117 | -781.069941 |           |
| Coordinates (xyz)      |             |           | Vibrations (cm <sup>-1</sup> ) |             |             |           |
| C                      | -0.080579   | 0.049684  | -0.087631                      | 24.2874     | 747.3467    | 1494.791  |
| C                      | 0.108762    | -0.168541 | 2.90933                        | 41.416      | 880.4753    | 1808.5128 |
| C                      | 1.568251    | -0.014169 | 3.188077                       | 55.1337     | 949.3544    | 3017.7033 |
| S                      | 1.693502    | 0.622138  | 4.887521                       | 92.8592     | 967.0378    | 3076.8398 |
| C                      | 1.155274    | -0.853851 | 5.783485                       | 116.0551    | 983.8142    | 3096.089  |
| H                      | 0.17073     | 1.056875  | -0.386477                      | 125.2645    | 1041.9881   | 3155.9267 |
| H                      | 0.349679    | -0.818427 | -0.563739                      | 161.1708    | 1069.6805   | 3162.5514 |
| H                      | -0.447572   | 0.7661    | 2.738274                       | 185.7299    | 1191.5905   | 3166.409  |
| H                      | 2.005928    | 0.743531  | 2.540672                       | 209.7171    | 1198.7283   | 3174.0503 |
| H                      | 2.093465    | -0.961509 | 3.087816                       | 278.3535    | 1223.1326   | 3292.7846 |
| H                      | 1.151297    | -0.589015 | 6.837762                       | 290.9746    | 1246.7992   | 3644.807  |
| H                      | 0.154408    | -1.153042 | 5.481613                       | 347.0847    | 1361.7178   |           |
| H                      | 1.85309     | -1.671454 | 5.618302                       | 500.1106    | 1421.1624   |           |
| O                      | -0.462284   | -1.23378  | 2.947173                       | 510.9304    | 1446.1956   |           |
| H                      | -1.52946    | -1.540575 | 1.410499                       | 556.8332    | 1451.3226   |           |
| O                      | -1.371895   | -0.04468  | 0.305172                       | 699.3423    | 1471.8925   |           |
| O                      | -1.72327    | -1.407463 | 0.463828                       | 721.8176    | 1486.1637   |           |

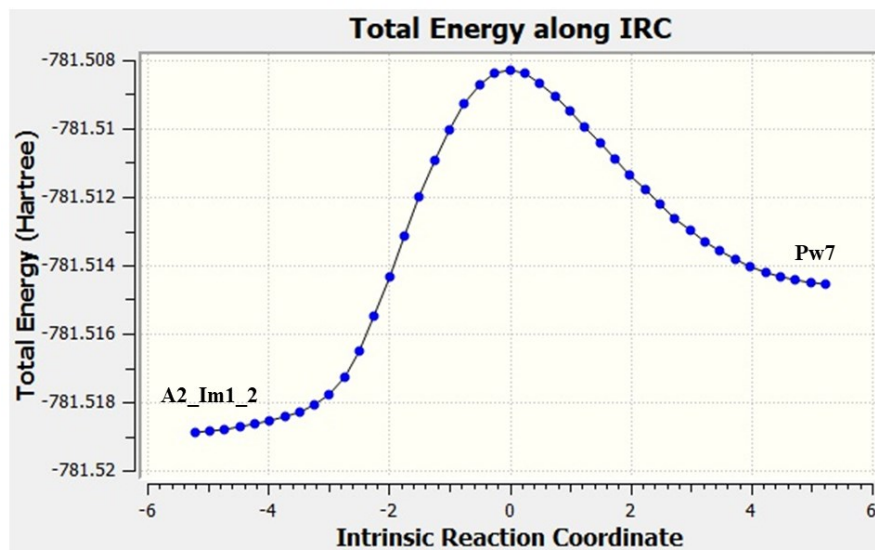

| Rx Coord | Energy      | Rx Coord | Energy           | Rx Coord | Energy      |
|----------|-------------|----------|------------------|----------|-------------|
| -5.21593 | -781.51888  | -1.49428 | -781.511991      | 2.24127  | -781.511802 |
| -4.96749 | -781.518848 | -1.24526 | -781.51095       | 2.49031  | -781.512222 |
| -4.71882 | -781.518801 | -0.9962  | -781.510039      | 2.73938  | -781.512618 |
| -4.46998 | -781.518739 | -0.74717 | -781.509291      | 2.98843  | -781.512979 |
| -4.22108 | -781.518659 | -0.49812 | -781.508734      | 3.23749  | -781.513305 |
| -3.97226 | -781.51856  | -0.2491  | -781.508392      | 3.48654  | -781.513592 |
| -3.7237  | -781.51844  | <b>0</b> | <b>-781.5083</b> | 3.7356   | -781.513839 |
| -3.47581 | -781.518293 | 0.24908  | -781.508384      | 3.98464  | -781.514045 |
| -3.22957 | -781.5181   | 0.498    | -781.508662      | 4.23367  | -781.514212 |
| -2.98494 | -781.517799 | 0.74703  | -781.509048      | 4.48265  | -781.514343 |
| -2.73793 | -781.51729  | 0.99602  | -781.509488      | 4.73147  | -781.514439 |
| -2.48993 | -781.51651  | 1.24507  | -781.509955      | 4.97956  | -781.514504 |
| -2.24124 | -781.515493 | 1.4941   | -781.510429      | 5.2254   | -781.514544 |
| -1.9923  | -781.514327 | 1.74316  | -781.5109        |          |             |
| -1.74331 | -781.513134 | 1.99221  | -781.511359      |          |             |

TS3-7\_A2\_Im2\_1--> Pw8

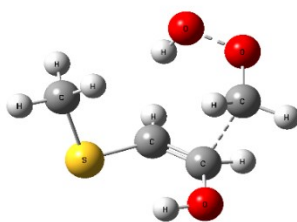

| Method                 |           | Ee          | E+ZPE       | $\Delta H$                     | $\Delta G$  |           |
|------------------------|-----------|-------------|-------------|--------------------------------|-------------|-----------|
| M06-2X/GD3/cc-pVTZ     |           | -781.488469 | -781.357529 | -781.346223                    | -781.394533 |           |
| M06-2X/DG3/aug-cc-pVTZ |           | -781.49571  | -781.36487  | -781.353567                    | -781.401912 |           |
| MN15/cc-pVTZ           |           | -781.122296 | -780.992019 | -780.980722                    | -781.028862 |           |
| MN15/aug-cc-pVTZ       |           | -781.133421 | -781.003342 | -780.992044                    | -781.040216 |           |
| Coordinates (xyz)      |           |             |             | Vibrations (cm <sup>-1</sup> ) |             |           |
| C                      | -0.231583 | 0.151109    | 0.06475     | <b>511.6332i</b>               | 714.8887    | 1491.4306 |
| C                      | -0.055267 | 0.115325    | 2.238219    | 43.5284                        | 812.3523    | 1542.2434 |
| C                      | 1.248302  | -0.196041   | 2.530451    | 76.6167                        | 918.7931    | 3071.9261 |
| S                      | 1.696449  | -1.823598   | 3.002752    | 97.5229                        | 962.0121    | 3113.9707 |
| C                      | 2.636349  | -2.425576   | 1.56351     | 143.266                        | 966.9111    | 3157.6467 |
| H                      | -0.218727 | -0.914883   | -0.134119   | 166.3061                       | 982.1951    | 3174.0925 |
| H                      | -0.367657 | 1.151637    | 2.231787    | 203.7106                       | 1000.3121   | 3183.0011 |
| H                      | 1.982862  | 0.597926    | 2.574113    | 240.8061                       | 1078.0131   | 3201.4015 |
| H                      | 2.17825   | 0.0222      | 0.443225    | 257.3119                       | 1190.2522   | 3245.4202 |
| H                      | 2.954107  | -3.437644   | 1.803723    | 278.0925                       | 1206.266    | 3698      |
| H                      | 2.018942  | -2.43744    | 0.669614    | 407.6592                       | 1224.6654   | 3728.6255 |
| H                      | 3.518711  | -1.8083     | 1.405292    | 456.3511                       | 1334.0722   |           |
| O                      | -1.088835 | -0.738659   | 2.435893    | 506.0019                       | 1352.4904   |           |
| H                      | -0.717253 | -1.608555   | 2.647194    | 549.8997                       | 1354.3413   |           |
| H                      | -1.166699 | 0.688714    | -0.034003   | 584.4872                       | 1443.0985   |           |
| O                      | 0.787062  | 0.868189    | -0.473674   | 661.177                        | 1447.0508   |           |
| O                      | 1.950544  | 0.062448    | -0.50125    | 688.303                        | 1475.6365   |           |



**Pw8**

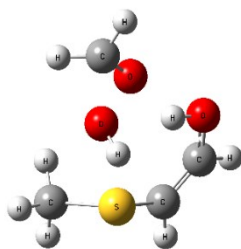

| Method                 |           | Ee          | E+ZPE                          | $\Delta H$  | $\Delta G$  |           |
|------------------------|-----------|-------------|--------------------------------|-------------|-------------|-----------|
| M06-2X/GD3/cc-pVTZ     |           | -781.506846 | -781.375885                    | -781.363304 | -781.414904 |           |
| M06-2X/DG3/aug-cc-pVTZ |           | -781.514065 | -781.383267                    | -781.370677 | -781.422299 |           |
| MN15/cc-pVTZ           |           | -781.140269 | -781.010279                    | -780.997517 | -781.049694 |           |
| MN15/aug-cc-pVTZ       |           | -781.151339 | -781.021567                    | -781.008814 | -781.060833 |           |
| Coordinates (xyz)      |           |             | Vibrations (cm <sup>-1</sup> ) |             |             |           |
| C                      | 0.290962  | -0.535722   | 0.147738                       | 41.3364     | 732.1286    | 1488.3965 |
| C                      | 0.036671  | 0.274642    | 3.462663                       | 69.3845     | 769.2309    | 1685.4289 |
| C                      | 1.295231  | -0.064288   | 3.765989                       | 89.4733     | 821.0728    | 3077.9615 |
| S                      | 1.814527  | -1.74994    | 3.727947                       | 96.5557     | 960.6809    | 3151.3434 |
| C                      | 3.117775  | -1.687427   | 2.466705                       | 107.0693    | 970.945     | 3164.5386 |
| H                      | 1.098264  | -0.95457    | -0.436397                      | 139.1545    | 988.169     | 3178.0545 |
| H                      | -0.316274 | 1.293146    | 3.562441                       | 166.0566    | 1000.495    | 3196.2626 |
| H                      | 1.966597  | 0.68392     | 4.165464                       | 177.1656    | 1106.5193   | 3218.3371 |
| H                      | 1.801291  | 0.85535     | 1.716295                       | 226.7066    | 1187.3334   | 3291.5178 |
| H                      | 3.566324  | -2.677388   | 2.43327                        | 246.5946    | 1228.7182   | 3680.3632 |
| H                      | 2.701847  | -1.436983   | 1.494902                       | 322.8396    | 1230.5058   | 3717.8824 |
| H                      | 3.876974  | -0.96261    | 2.75224                        | 447.7011    | 1346.4081   |           |
| O                      | -0.918167 | -0.55406    | 3.027222                       | 461.6771    | 1371.2682   |           |
| H                      | -0.519931 | -1.428261   | 2.887953                       | 514.8062    | 1390.8495   |           |
| H                      | -0.739341 | -0.817996   | -0.004308                      | 616.9841    | 1446.0012   |           |
| O                      | 0.399432  | 0.765997    | 0.496321                       | 634.537     | 1452.4748   |           |
| O                      | 1.762069  | 1.060891    | 0.765755                       | 729.964     | 1472.8652   |           |

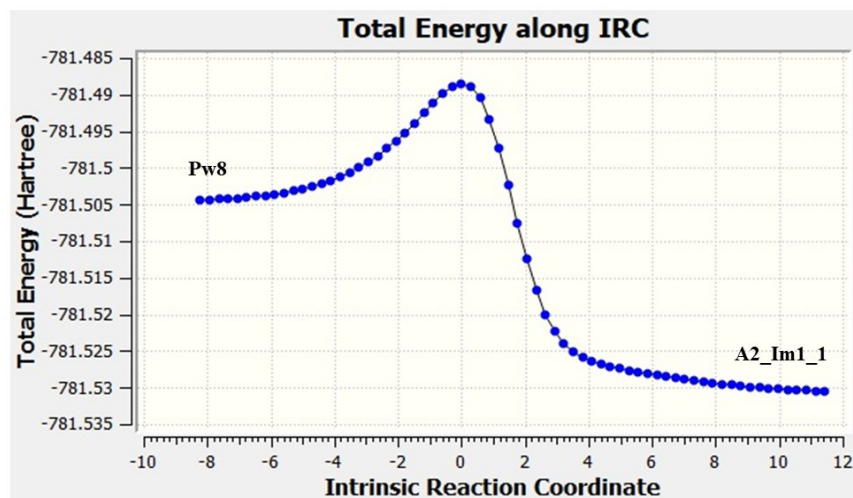

| Rx Coord | Energy      | Rx Coord | Energy           | Rx Coord | Energy      |
|----------|-------------|----------|------------------|----------|-------------|
| -8.21972 | -781.504371 | -1.46811 | -781.493912      | 5.26758  | -781.527651 |
| -7.92716 | -781.504326 | -1.17444 | -781.492552      | 5.5609   | -781.527882 |
| -7.63424 | -781.504272 | -0.88086 | -781.491163      | 5.85456  | -781.5281   |
| -7.34098 | -781.504208 | -0.58724 | -781.489849      | 6.14823  | -781.528312 |
| -7.04748 | -781.504127 | -0.29367 | -781.488852      | 6.44193  | -781.528512 |
| -6.75389 | -781.50403  | <b>0</b> | <b>-781.4885</b> | 6.73564  | -781.528704 |
| -6.46026 | -781.503912 | 0.2937   | -781.488929      | 7.02934  | -781.528887 |
| -6.16664 | -781.503769 | 0.58729  | -781.49048       | 7.32308  | -781.529062 |
| -5.87303 | -781.503599 | 0.88099  | -781.493316      | 7.61679  | -781.529228 |
| -5.57946 | -781.503397 | 1.1747   | -781.497402      | 7.91053  | -781.529386 |
| -5.28588 | -781.503158 | 1.4684   | -781.502341      | 8.20425  | -781.529532 |
| -4.99231 | -781.502878 | 1.76203  | -781.507533      | 8.49799  | -781.52967  |
| -4.6987  | -781.502549 | 2.05556  | -781.512467      | 8.7917   | -781.529796 |
| -4.40506 | -781.502165 | 2.34891  | -781.51672       | 9.08545  | -781.529913 |
| -4.11137 | -781.501716 | 2.64152  | -781.520028      | 9.37917  | -781.53002  |
| -3.81766 | -781.501201 | 2.93287  | -781.522345      | 9.67292  | -781.530119 |
| -3.52393 | -781.500614 | 3.22457  | -781.523945      | 9.96662  | -781.530209 |
| -3.23022 | -781.49995  | 3.51694  | -781.525083      | 10.26037 | -781.53029  |
| -2.93651 | -781.499199 | 3.80878  | -781.52587       | 10.55401 | -781.53036  |
| -2.64282 | -781.498352 | 4.10016  | -781.526436      | 10.8477  | -781.530423 |
| -2.34912 | -781.497403 | 4.39127  | -781.526839      | 11.14137 | -781.530476 |
| -2.05543 | -781.496348 | 4.68278  | -781.527151      | 11.43498 | -781.530518 |
| -1.76175 | -781.495182 | 4.97462  | -781.527414      |          |             |

4. MSP decomposition

| TS4-1_MSP-->MSP1                                                                  |             |             |             |                                |           |           |
|-----------------------------------------------------------------------------------|-------------|-------------|-------------|--------------------------------|-----------|-----------|
| 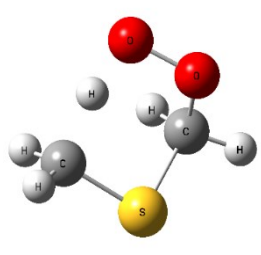 |             |             |             |                                |           |           |
| Method                                                                            | Ee          | E+ZPE       | $\Delta H$  | $\Delta G$                     |           |           |
| M06-2X/GD3/cc-pVTZ                                                                | -627.669648 | -627.601289 | -627.595225 | -627.630489                    |           |           |
| M06-2X/DG3/aug-cc-pVTZ                                                            | -627.674394 | -627.606103 | -627.600038 | -627.635299                    |           |           |
| MN15/cc-pVTZ                                                                      | -627.414333 | -627.346277 | -627.340178 | -627.37549                     |           |           |
| MN15/aug-cc-pVTZ                                                                  | -627.42194  | -627.354004 | -627.3479   | -627.383218                    |           |           |
| SVECV-f12                                                                         | -627.554261 | -627.485971 | -627.479906 | -627.515167                    |           |           |
| Coordinates (xyz)                                                                 |             |             |             | Vibrations (cm <sup>-1</sup> ) |           |           |
| C                                                                                 | 0.001485    | -0.012139   | -0.013498   | <b>1836.5292i</b>              | 985.9391  | 3092.0438 |
| S                                                                                 | -0.019768   | 0.211100    | 1.800631    | 187.3618                       | 1015.9504 | 3108.4631 |
| C                                                                                 | 1.710700    | 0.084828    | 2.019286    | 363.5778                       | 1031.2544 | 3180.3665 |
| H                                                                                 | -1.027634   | -0.018565   | -0.361728   | 383.8515                       | 1115.4696 | 3217.686  |
| H                                                                                 | 0.596141    | 0.763709    | -0.493297   | 449.0052                       | 1246.4396 |           |
| H                                                                                 | 1.986288    | -0.297183   | 2.994816    | 526.4722                       | 1275.3136 |           |
| H                                                                                 | 2.001157    | -0.782823   | 1.026290    | 626.1916                       | 1299.0041 |           |
| H                                                                                 | 2.290466    | 0.941107    | 1.684253    | 703.0899                       | 1427.9016 |           |
| O                                                                                 | 1.912627    | -1.209399   | -0.103064   | 815.1256                       | 1455.4505 |           |
| O                                                                                 | 0.544718    | -1.275812   | -0.263628   | 920.2907                       | 1549.8906 |           |

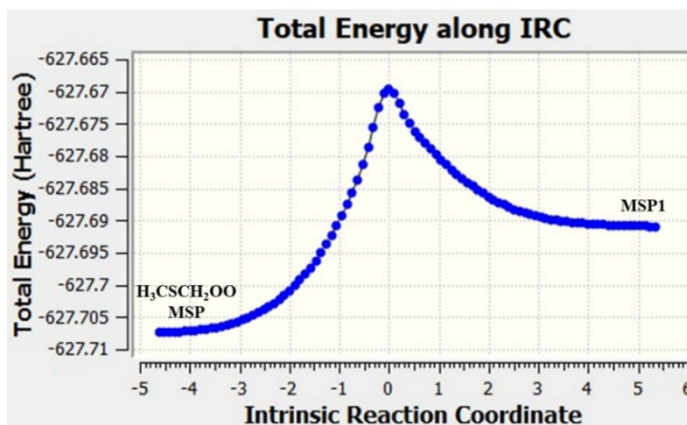

| Rx Coord | Energy      | Rx Coord | Energy           | Rx Coord | Energy      |
|----------|-------------|----------|------------------|----------|-------------|
| -4.61611 | -627.707394 | -1.25785 | -627.693781      | 2.09676  | -627.686768 |
| -4.51123 | -627.707377 | -1.15292 | -627.692405      | 2.20174  | -627.687195 |
| -4.40634 | -627.707355 | -1.04799 | -627.690919      | 2.30671  | -627.687587 |
| -4.30147 | -627.707324 | -0.94307 | -627.689316      | 2.41168  | -627.687947 |
| -4.19661 | -627.707285 | -0.83815 | -627.687586      | 2.51665  | -627.688274 |
| -4.09173 | -627.707235 | -0.73325 | -627.685718      | 2.62162  | -627.688572 |
| -3.98682 | -627.707173 | -0.62844 | -627.683682      | 2.72658  | -627.688841 |
| -3.8819  | -627.707097 | -0.52404 | -627.681412      | 2.83155  | -627.689082 |
| -3.77698 | -627.707005 | -0.41965 | -627.678668      | 2.93651  | -627.689299 |
| -3.67203 | -627.706896 | -0.31486 | -627.6755        | 3.04147  | -627.689493 |
| -3.56708 | -627.706766 | -0.20993 | -627.672468      | 3.14642  | -627.689666 |
| -3.46212 | -627.706615 | -0.10498 | -627.670368      | 3.25137  | -627.689819 |
| -3.35715 | -627.706441 | <b>0</b> | <b>-627.6696</b> | 3.35631  | -627.689955 |
| -3.25219 | -627.70624  | 0.10497  | -627.670293      | 3.46124  | -627.690075 |
| -3.14722 | -627.706011 | 0.20986  | -627.671897      | 3.56617  | -627.690182 |
| -3.04225 | -627.70575  | 0.31439  | -627.673672      | 3.6711   | -627.690276 |
| -2.93728 | -627.705457 | 0.41772  | -627.675033      | 3.77602  | -627.690359 |
| -2.83231 | -627.70513  | 0.52237  | -627.676153      | 3.88094  | -627.690433 |
| -2.72734 | -627.704763 | 0.62727  | -627.677167      | 3.98586  | -627.690499 |
| -2.62237 | -627.704356 | 0.73219  | -627.678109      | 4.09078  | -627.690559 |
| -2.51739 | -627.703906 | 0.83713  | -627.678991      | 4.19571  | -627.690612 |
| -2.41242 | -627.703409 | 0.94209  | -627.679825      | 4.30065  | -627.690661 |
| -2.30745 | -627.702861 | 1.04705  | -627.680621      | 4.4056   | -627.690705 |
| -2.20248 | -627.70226  | 1.15201  | -627.681382      | 4.51056  | -627.690745 |
| -2.09751 | -627.701602 | 1.25698  | -627.682113      | 4.61552  | -627.690782 |
| -1.99254 | -627.700883 | 1.36195  | -627.682812      | 4.72049  | -627.690816 |
| -1.88758 | -627.700099 | 1.46692  | -627.683478      | 4.82546  | -627.690846 |
| -1.78261 | -627.699247 | 1.57189  | -627.684112      | 4.93044  | -627.690873 |
| -1.67765 | -627.698322 | 1.67687  | -627.684713      | 5.03542  | -627.690897 |
| -1.5727  | -627.697319 | 1.78184  | -627.685279      | 5.14039  | -627.690918 |
| -1.46774 | -627.696231 | 1.88682  | -627.685811      | 5.24537  | -627.690937 |
| -1.3628  | -627.695055 | 1.99179  | -627.686308      | 5.35035  | -627.690952 |

TS4-2\_MSP1-->Pw9

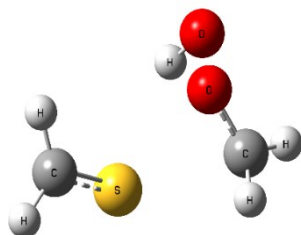

| Method                 | E <sub>c</sub> | E+ZPE       | ΔH          | ΔG                             |           |           |
|------------------------|----------------|-------------|-------------|--------------------------------|-----------|-----------|
| M06-2X/GD3/cc-pVTZ     | -627.648034    | -627.579198 | -627.571201 | -627.61161                     |           |           |
| M06-2X/DG3/aug-cc-pVTZ | -627.652918    | -627.584209 | -627.576161 | -627.616768                    |           |           |
| MN15/cc-pVTZ           | -627.395151    | -627.326732 | -627.317669 | -627.361289                    |           |           |
| MN15/aug-cc-pVTZ       | -627.402679    | -627.334414 | -627.325278 | -627.368825                    |           |           |
| SVECV-f12              | -627.531795    | -627.463086 | -627.455038 | -627.495644                    |           |           |
| Coordinates (xyz)      |                |             |             | Vibrations (cm <sup>-1</sup> ) |           |           |
| C                      | 0.000675       | 0.001792    | -0.007309   | <b>102.5325i</b>               | 957.4911  | 3159.6907 |
| S                      | 0.017094       | 0.022571    | 2.922901    | 52.3713                        | 994.9849  | 3202.2957 |
| C                      | 1.601707       | -0.017331   | 3.198661    | 87.4472                        | 1004.8302 | 3303.836  |
| H                      | 0.329909       | -0.979545   | -0.310474   | 159.9874                       | 1082.3346 | 3574.4659 |
| H                      | -0.987442      | 0.383882    | -0.217092   | 203.5002                       | 1191.097  |           |
| H                      | 2.091377       | -0.914598   | 3.563037    | 285.0648                       | 1235.3448 |           |
| H                      | 2.241254       | 0.839236    | 3.009095    | 361.3667                       | 1457.2957 |           |
| O                      | 1.011950       | 0.884913    | 0.049604    | 512.4782                       | 1481.5383 |           |
| O                      | 0.523452       | 2.125293    | 0.532815    | 548.8712                       | 1498.6038 |           |
| H                      | 0.281305       | 1.888888    | 1.450584    | 692.7718                       | 3112.1345 |           |

Pw9

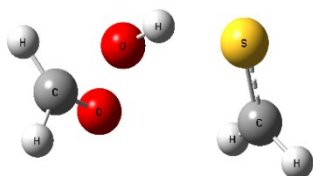

| Method                 |           |           |           | Ee                             | E+ZPE       | $\Delta H$  | $\Delta G$  |
|------------------------|-----------|-----------|-----------|--------------------------------|-------------|-------------|-------------|
| M06-2X/GD3/cc-pVTZ     |           |           |           | -627.648954                    | -627.580218 | -627.571177 | -627.614531 |
| M06-2X/DG3/aug-cc-pVTZ |           |           |           | -627.653869                    | -627.585288 | -627.576199 | -627.619691 |
| MN15/cc-pVTZ           |           |           |           | -627.437079                    | -627.365868 | -627.358086 | -627.397086 |
| MN15/aug-cc-pVTZ       |           |           |           | -627.445                       | -627.373896 | -627.366089 | -627.405186 |
| SVECV-f12              |           |           |           | -627.534044                    | -627.465463 | -627.456374 | -627.499866 |
| Coordinates (xyz)      |           |           |           | Vibrations (cm <sup>-1</sup> ) |             |             |             |
| C                      | 0.005528  | 0.002023  | -0.005251 | 40.5892                        | 960.7761    | 3157.6858   |             |
| S                      | 0.007251  | 0.023756  | 3.672263  | 53.7619                        | 1015.6163   | 3201.023    |             |
| C                      | 1.600668  | -0.010964 | 3.49161   | 130.2901                       | 1048.2072   | 3298.5666   |             |
| H                      | 0.396584  | -0.907247 | -0.434635 | 136.48                         | 1119.9632   | 3562.2036   |             |
| H                      | -0.862663 | 0.50933   | -0.399301 | 167.9295                       | 1189.7658   |             |             |
| H                      | 2.220915  | -0.691986 | 4.066951  | 219.203                        | 1235.678    |             |             |
| H                      | 2.110641  | 0.634496  | 2.781617  | 293.0568                       | 1450.2077   |             |             |
| O                      | 0.988313  | 0.776231  | 0.510135  | 503.5115                       | 1477.7222   |             |             |
| O                      | 0.417003  | 1.938715  | 1.088761  | 555.1677                       | 1505.5049   |             |             |
| H                      | 0.038052  | 1.577315  | 1.915116  | 671.9182                       | 3108.9207   |             |             |

TS4-3\_MSP2-->Pw10

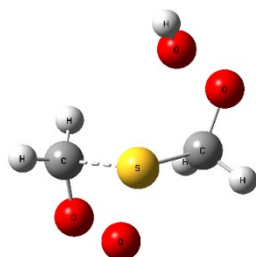

| Method                 | Ee          | E+ZPE       | $\Delta H$                     | $\Delta G$       |           |           |
|------------------------|-------------|-------------|--------------------------------|------------------|-----------|-----------|
| M06-2X/GD3/cc-pVTZ     | -777.99177  | -777.912301 | -777.903124                    | -777.946227      |           |           |
| M06-2X/DG3/aug-cc-pVTZ | -778.000822 | -777.921446 | -777.912252                    | -777.955454      |           |           |
| MN15/cc-pVTZ           | -777.648512 | -777.569322 | -777.56016                     | -777.603123      |           |           |
| MN15/aug-cc-pVTZ       | -777.660763 | -777.581658 | -777.572516                    | -777.615448      |           |           |
| Coordinates (xyz)      |             |             | Vibrations (cm <sup>-1</sup> ) |                  |           |           |
| C                      | -0.016924   | 0.001630    | -0.009237                      | <b>975.0376i</b> | 744.0373  | 1503.4915 |
| S                      | -0.054074   | 0.062050    | 1.819935                       | 68.2111          | 855.2833  | 3069.4247 |
| C                      | 1.886866    | 0.030189    | 2.221771                       | 119.8196         | 927.8848  | 3089.7928 |
| H                      | -0.824696   | 0.628635    | -0.379047                      | 132.839          | 999.2984  | 3166.1933 |
| H                      | 0.952761    | 0.397504    | -0.312409                      | 191.8695         | 1120.0974 | 3170.16   |
| H                      | 1.958648    | -0.189256   | 3.287905                       | 194.0591         | 1129.2363 | 3823.3318 |
| O                      | -0.259741   | -1.271269   | -0.514354                      | 262.8213         | 1170.4936 |           |
| O                      | 0.883862    | -2.067647   | -0.222438                      | 319.2223         | 1214.7007 |           |
| H                      | 0.496570    | -2.758697   | 0.329652                       | 364.4558         | 1261.1184 |           |
| H                      | 2.395244    | -0.684134   | 1.578817                       | 500.2283         | 1315.8532 |           |
| O                      | 2.086097    | 1.338735    | 1.891070                       | 534.5001         | 1414.6594 |           |
| O                      | 0.582435    | 1.713657    | 1.897645                       | 721.0897         | 1457.8108 |           |

**Pw10**

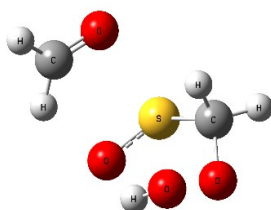

| Method                 | Ee          | E+ZPE       | $\Delta H$                     | $\Delta G$  |           |           |
|------------------------|-------------|-------------|--------------------------------|-------------|-----------|-----------|
| M06-2X/GD3/cc-pVTZ     | -778.131921 | -778.052609 | -778.04161                     | -778.090575 |           |           |
| M06-2X/DG3/aug-cc-pVTZ | -778.139903 | -778.060858 | -778.049751                    | -778.099502 |           |           |
| MN15/cc-pVTZ           | -777.794808 | -777.716382 | -777.705227                    | -777.754489 |           |           |
| MN15/aug-cc-pVTZ       | -777.783678 | -777.704988 | -777.693885                    | -777.743035 |           |           |
| Coordinates (xyz)      |             |             | Vibrations (cm <sup>-1</sup> ) |             |           |           |
| C                      | -0.112933   | 0.047346    | -0.191413                      | 17.1502     | 657.6133  | 1853.404  |
| S                      | 0.112184    | 0.455796    | 1.591255                       | 55.0422     | 906.7562  | 2961.7233 |
| C                      | 3.601534    | 0.059493    | 0.76932                        | 82.754      | 974.6835  | 3046.2054 |
| H                      | -0.971808   | 0.621699    | -0.539392                      | 91.2729     | 1090.0456 | 3085.8745 |
| H                      | 0.797075    | 0.325046    | -0.721042                      | 111.6405    | 1135.4504 | 3158.7291 |
| H                      | 4.67936     | -0.024601   | 0.555557                       | 134.4935    | 1228.4035 | 3721.9414 |
| O                      | -0.414444   | -1.300825   | -0.35305                       | 159.0652    | 1268.2977 |           |
| O                      | 0.804211    | -2.033262   | -0.32198                       | 218.3134    | 1278.6738 |           |
| H                      | 0.965882    | -2.082104   | 0.634579                       | 270.2201    | 1305.483  |           |
| H                      | 3.164481    | -0.667247   | 1.472296                       | 395.5592    | 1446.8961 |           |
| O                      | 2.93123     | 0.912604    | 0.25773                        | 496.5468    | 1472.7111 |           |
| O                      | 0.864126    | -0.732605   | 2.143737                       | 537.0832    | 1534.6625 |           |



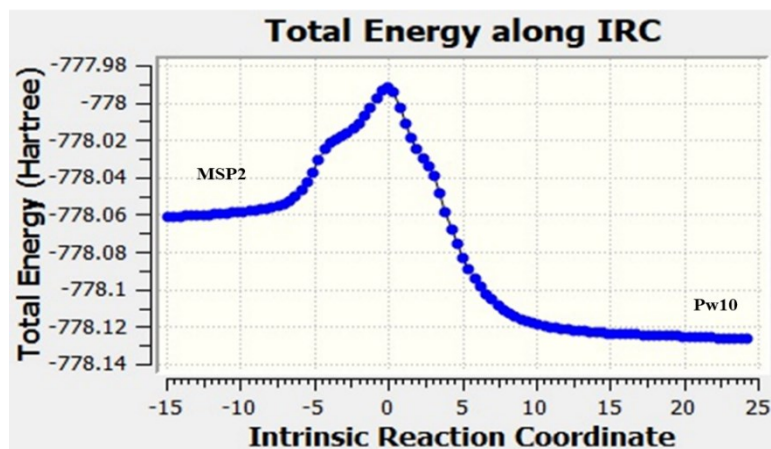

| Rx Coord  | Energy      | Rx Coord | Energy           | Rx Coord | Energy      |
|-----------|-------------|----------|------------------|----------|-------------|
| -14.85381 | -778.060988 | -1.56326 | -778.007126      | 11.73904 | -778.121234 |
| -14.46243 | -778.060934 | -1.17163 | -778.002707      | 12.13064 | -778.12162  |
| -14.07106 | -778.06086  | -0.78044 | -777.998021      | 12.52215 | -778.12197  |
| -13.67952 | -778.060763 | -0.39021 | -777.993808      | 12.91375 | -778.122289 |
| -13.28789 | -778.060642 | <b>0</b> | <b>-777.9918</b> | 13.30522 | -778.122586 |
| -12.89617 | -778.060495 | 0.39086  | -777.99468       | 13.69682 | -778.122858 |
| -12.50441 | -778.060325 | 0.7823   | -778.002548      | 14.0883  | -778.123117 |
| -12.11264 | -778.060126 | 1.17382  | -778.011607      | 14.47955 | -778.123348 |
| -11.72089 | -778.059903 | 1.56519  | -778.019308      | 14.87091 | -778.123557 |
| -11.32915 | -778.059651 | 1.95626  | -778.025172      | 15.26117 | -778.123737 |
| -10.93745 | -778.059377 | 2.34692  | -778.029684      | 15.65229 | -778.123892 |
| -10.54581 | -778.059077 | 2.73652  | -778.033786      | 16.04223 | -778.124024 |
| -10.1542  | -778.058756 | 3.1238   | -778.039286      | 16.43285 | -778.12414  |
| -9.76267  | -778.058413 | 3.514    | -778.048473      | 16.82314 | -778.124247 |
| -9.37111  | -778.058057 | 3.90474  | -778.058652      | 17.21439 | -778.124357 |
| -8.97987  | -778.057686 | 4.29607  | -778.067921      | 17.60594 | -778.12447  |
| -8.58911  | -778.057304 | 4.68753  | -778.075966      | 17.99753 | -778.124593 |
| -8.20051  | -778.056891 | 5.07917  | -778.08292       | 18.38912 | -778.12472  |
| -7.81319  | -778.056357 | 5.47094  | -778.088912      | 18.78079 | -778.124852 |
| -7.42405  | -778.055549 | 5.86277  | -778.094079      | 19.17253 | -778.124986 |
| -7.03318  | -778.054306 | 6.25461  | -778.098524      | 19.5642  | -778.125129 |
| -6.64176  | -778.052506 | 6.64646  | -778.102348      | 19.95575 | -778.125273 |
| -6.25014  | -778.050035 | 7.0383   | -778.105623      | 20.34752 | -778.125413 |
| -5.85848  | -778.046785 | 7.43015  | -778.10842       | 20.73931 | -778.125547 |
| -5.46687  | -778.042645 | 7.822    | -778.110804      | 21.131   | -778.125681 |
| -5.07639  | -778.037475 | 8.21385  | -778.112835      | 21.52271 | -778.125814 |
| -4.6866   | -778.030954 | 8.60568  | -778.114551      | 21.91438 | -778.125943 |
| -4.2963   | -778.024505 | 8.9975   | -778.115985      | 22.30608 | -778.126058 |
| -3.9102   | -778.021491 | 9.38928  | -778.117179      | 22.69772 | -778.126167 |
| -3.51937  | -778.019756 | 9.78103  | -778.118177      | 23.0893  | -778.126265 |
| -3.12803  | -778.018133 | 10.17273 | -778.119016      | 23.48073 | -778.126357 |
| -2.7373   | -778.016289 | 10.56441 | -778.119721      | 23.8721  | -778.12644  |
| -2.34634  | -778.013947 | 10.95595 | -778.120308      | 24.26353 | -778.126523 |
| -1.95494  | -778.01092  | 11.34754 | -778.120806      |          |             |

TS4-4\_MSP2-->MSP3

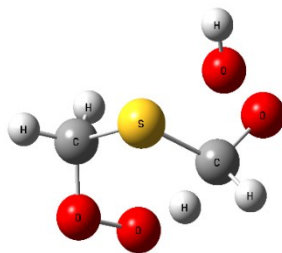

| Method                 | Ee          | E+ZPE       | $\Delta H$                     | $\Delta G$        |           |           |
|------------------------|-------------|-------------|--------------------------------|-------------------|-----------|-----------|
| M06-2X/GD3/cc-pVTZ     | -778.026227 | -777.949041 | -777.940701                    | -777.981697       |           |           |
| M06-2X/DG3/aug-cc-pVTZ | -778.033797 | -777.956874 | -777.948458                    | -777.989676       |           |           |
| MN15/cc-pVTZ           | -777.68226  | -777.605574 | -777.597136                    | -777.638358       |           |           |
| MN15/aug-cc-pVTZ       | -777.693092 | -777.616622 | -777.608139                    | -777.6495         |           |           |
| Coordinates (xyz)      |             |             | Vibrations (cm <sup>-1</sup> ) |                   |           |           |
| C                      | -0.001309   | -0.000405   | 0.001771                       | <b>1942.2075i</b> | 759.8592  | 1460.0917 |
| S                      | 0.001540    | 0.007493    | 1.780325                       | 101.9192          | 899.3292  | 1550.2099 |
| C                      | 1.834589    | 0.001522    | 2.011022                       | 130.6415          | 962.8252  | 3110.3926 |
| H                      | -0.740841   | 0.670242    | -0.427230                      | 188.7217          | 997.3354  | 3159.9239 |
| H                      | 1.210707    | 0.495154    | -0.227092                      | 219.6992          | 1017.8691 | 3189.9935 |
| H                      | 2.015726    | 0.179521    | 3.067460                       | 305.0188          | 1123.2042 | 3785.3663 |
| O                      | -0.132919   | -1.199364   | -0.666414                      | 351.7358          | 1135.5261 |           |
| O                      | 0.823633    | -2.127017   | -0.187751                      | 398.9099          | 1194.8761 |           |
| H                      | 0.306063    | -2.621534   | 0.463635                       | 504.3996          | 1281.2577 |           |
| H                      | 2.249087    | -0.940644   | 1.662975                       | 557.7869          | 1301.5917 |           |
| O                      | 2.372933    | 1.070692    | 1.301034                       | 639.7867          | 1336.1927 |           |
| O                      | 2.390254    | 0.738418    | -0.037159                      | 677.106           | 1423.8348 |           |

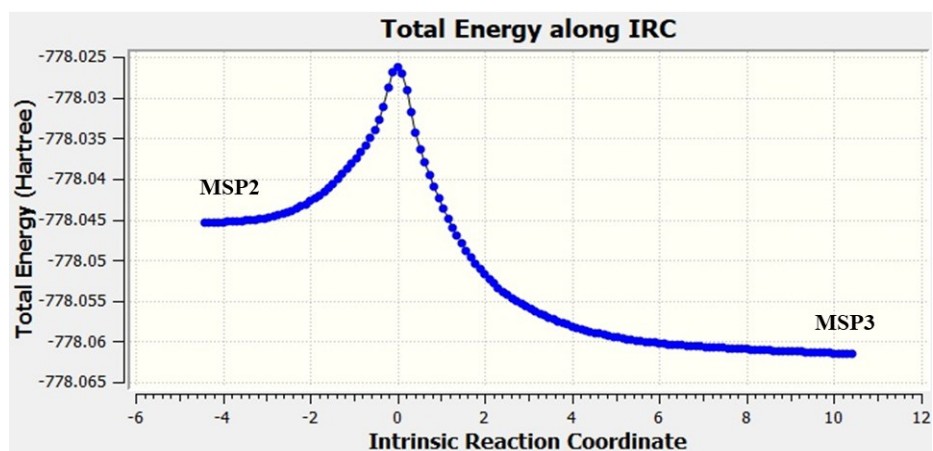

| Rx Coord | Energy      | Rx Coord | Energy      | Rx Coord | Energy      |
|----------|-------------|----------|-------------|----------|-------------|
| -4.41506 | -778.045407 | 0.62934  | -778.038008 | 5.67599  | -778.060044 |
| -4.30993 | -778.045391 | 0.7345   | -778.039572 | 5.7812   | -778.060111 |
| -4.20482 | -778.045373 | 0.83968  | -778.041029 | 5.88642  | -778.060173 |
| -4.09973 | -778.045353 | 0.94487  | -778.04239  | 5.99164  | -778.060232 |
| -3.99461 | -778.04533  | 1.05007  | -778.043663 | 6.09685  | -778.060286 |
| -3.88949 | -778.045303 | 1.15528  | -778.044855 | 6.20206  | -778.060338 |
| -3.78434 | -778.045272 | 1.2605   | -778.045968 | 6.30727  | -778.060386 |
| -3.6792  | -778.045236 | 1.36572  | -778.047004 | 6.41247  | -778.060432 |
| -3.57407 | -778.045195 | 1.47094  | -778.047966 | 6.51768  | -778.060476 |
| -3.46893 | -778.045146 | 1.57616  | -778.048857 | 6.6229   | -778.060518 |
| -3.36379 | -778.045089 | 1.68138  | -778.049678 | 6.72811  | -778.060558 |
| -3.25864 | -778.045022 | 1.7866   | -778.050434 | 6.83333  | -778.060597 |
| -3.15348 | -778.044943 | 1.89182  | -778.051129 | 6.93855  | -778.060635 |
| -3.04831 | -778.044852 | 1.99704  | -778.051768 | 7.04378  | -778.060671 |
| -2.94312 | -778.044745 | 2.10226  | -778.052356 | 7.14901  | -778.060707 |
| -2.83793 | -778.044621 | 2.20748  | -778.052897 | 7.25424  | -778.060742 |
| -2.73272 | -778.044479 | 2.31269  | -778.053396 | 7.35947  | -778.060775 |
| -2.62752 | -778.044316 | 2.41791  | -778.053857 | 7.4647   | -778.060808 |
| -2.52231 | -778.04413  | 2.52313  | -778.054285 | 7.56994  | -778.060841 |
| -2.4171  | -778.043919 | 2.62834  | -778.054681 | 7.67517  | -778.060872 |
| -2.31189 | -778.04368  | 2.73356  | -778.055051 | 7.78041  | -778.060903 |
| -2.20667 | -778.04341  | 2.83878  | -778.055397 | 7.88564  | -778.060933 |
| -2.10143 | -778.043107 | 2.944    | -778.055721 | 7.99088  | -778.060963 |
| -1.9962  | -778.042773 | 3.04922  | -778.056025 | 8.09612  | -778.060992 |
| -1.89097 | -778.042406 | 3.15444  | -778.056312 | 8.20135  | -778.06102  |
| -1.78574 | -778.042004 | 3.25967  | -778.056583 | 8.30659  | -778.061048 |
| -1.68051 | -778.041565 | 3.36489  | -778.05684  | 8.41182  | -778.061076 |
| -1.57527 | -778.041089 | 3.47012  | -778.057082 | 8.51706  | -778.061102 |
| -1.47004 | -778.040576 | 3.57534  | -778.057313 | 8.6223   | -778.061129 |

|          |             |         |             |          |             |
|----------|-------------|---------|-------------|----------|-------------|
| -1.36481 | -778.040027 | 3.68057 | -778.057532 | 8.72753  | -778.061155 |
| -1.25958 | -778.03944  | 3.7858  | -778.05774  | 8.83277  | -778.061181 |
| -1.15435 | -778.038816 | 3.89103 | -778.057938 | 8.938    | -778.061206 |
| -1.04913 | -778.038152 | 3.99626 | -778.058127 | 9.04324  | -778.061231 |
| -0.94392 | -778.037445 | 4.10149 | -778.058306 | 9.14847  | -778.061256 |
| -0.83871 | -778.036688 | 4.20672 | -778.058476 | 9.25371  | -778.061281 |
| -0.73353 | -778.035868 | 4.31195 | -778.058637 | 9.35894  | -778.061305 |
| -0.62837 | -778.034964 | 4.41718 | -778.05879  | 9.46418  | -778.061329 |
| -0.5233  | -778.033956 | 4.52242 | -778.058934 | 9.56941  | -778.061353 |
| -0.4188  | -778.032719 | 4.62764 | -778.05907  | 9.67465  | -778.061376 |
| -0.31547 | -778.031099 | 4.73287 | -778.059198 | 9.77989  | -778.061399 |
| -0.21043 | -778.028859 | 4.8381  | -778.059319 | 9.88512  | -778.061422 |
| -0.10524 | -778.026958 | 4.94333 | -778.059432 | 9.99036  | -778.061444 |
| 0        | -778.026227 | 5.04856 | -778.059538 | 10.0956  | -778.061466 |
| 0.10525  | -778.027    | 5.15379 | -778.059638 | 10.20083 | -778.061488 |
| 0.21044  | -778.029127 | 5.25901 | -778.059731 | 10.30607 | -778.06151  |
| 0.31556  | -778.031872 | 5.363   | -778.059818 | 10.4113  | -778.061531 |
| 0.42024  | -778.034344 | 5.46554 | -778.059899 |          |             |
| 0.5244   | -778.036321 | 5.57077 | -778.059973 |          |             |

TS4-5\_MSP3a-->Pw11

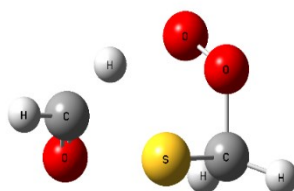

| Method                 | Ee          | E+ZPE       | $\Delta H$                     | $\Delta G$       |           |           |
|------------------------|-------------|-------------|--------------------------------|------------------|-----------|-----------|
| M06-2X/GD3/cc-pVTZ     | -702.210294 | -702.1478   | -702.140405                    | -702.178674      |           |           |
| M06-2X/DG3/aug-cc-pVTZ | -702.216471 | -702.154083 | -702.146672                    | -702.185006      |           |           |
| MN15/cc-pVTZ           | -701.919414 | -701.857131 | -701.849735                    | -701.88793       |           |           |
| MN15/aug-cc-pVTZ       | -701.928172 | -701.866019 | -701.858612                    | -701.896839      |           |           |
| SVECV-f12              | -702.102119 | -702.039731 | -702.03232                     | -702.070653      |           |           |
| Coordinates (xyz)      |             |             | Vibrations (cm <sup>-1</sup> ) |                  |           |           |
| C                      | 0.050199    | -0.095753   | -0.382678                      | <b>479.0372i</b> | 917.6307  | 2105.5033 |
| S                      | 0.167193    | 0.689183    | 2.056623                       | 97.6251          | 966.5764  | 2999.4367 |
| C                      | 1.771373    | -0.071855   | 2.105243                       | 155.9435         | 1077.2144 | 3110.5285 |
| H                      | -0.947759   | 0.340982    | -0.542904                      | 241.8483         | 1128.9753 | 3208.0573 |
| H                      | 0.932474    | 0.661585    | -0.285953                      | 270.0252         | 1182.9956 |           |
| H                      | 2.262496    | -0.076743   | 3.071244                       | 327.4978         | 1250.2076 |           |
| O                      | 0.303916    | -1.254412   | -0.499524                      | 411.596          | 1296.7779 |           |
| H                      | 1.877627    | -0.987179   | 1.526987                       | 534.1015         | 1393.9249 |           |
| O                      | 2.310463    | 1.033748    | 1.329523                       | 701.0888         | 1469.5538 |           |
| O                      | 2.471250    | 0.770384    | 0.085406                       | 712.2222         | 1825.9207 |           |

**Pw11**

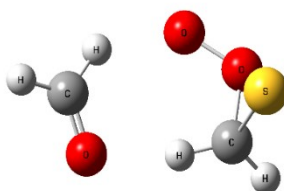

| <b>Method</b>            |           |           |           |          |           |           | <b>Ee</b>                           |           |          | <b>E+ZPE</b> |           |           | <b><math>\Delta H</math></b> |          |           | <b><math>\Delta G</math></b> |           |           |           |           |           |          |           |          |
|--------------------------|-----------|-----------|-----------|----------|-----------|-----------|-------------------------------------|-----------|----------|--------------|-----------|-----------|------------------------------|----------|-----------|------------------------------|-----------|-----------|-----------|-----------|-----------|----------|-----------|----------|
| M06-2X/GD3/cc-pVTZ       |           |           |           |          |           |           | -702.222321                         |           |          | -702.159395  |           |           | -702.149993                  |          |           | -702.194179                  |           |           |           |           |           |          |           |          |
| M06-2X/DG3/aug-cc-pVTZ   |           |           |           |          |           |           | -702.229282                         |           |          | -702.166575  |           |           | -702.157101                  |          |           | -702.201955                  |           |           |           |           |           |          |           |          |
| MN15/cc-pVTZ             |           |           |           |          |           |           | -701.924924                         |           |          | -701.862151  |           |           | -701.85259                   |          |           | -701.897388                  |           |           |           |           |           |          |           |          |
| MN15/aug-cc-pVTZ         |           |           |           |          |           |           | -701.933715                         |           |          | -701.871213  |           |           | -701.86156                   |          |           | -701.906748                  |           |           |           |           |           |          |           |          |
| SVECV-f12                |           |           |           |          |           |           | -702.100581                         |           |          | -702.037874  |           |           | -702.0284                    |          |           | -702.073255                  |           |           |           |           |           |          |           |          |
| <b>Coordinates (xyz)</b> |           |           |           |          |           |           | <b>Vibrations (cm<sup>-1</sup>)</b> |           |          |              |           |           |                              |          |           |                              |           |           |           |           |           |          |           |          |
| C                        | 0.011474  | 0.008528  | -0.073443 | 22.7406  | 861.4535  | 2958.9377 | S                                   | 0.093853  | 0.061956 | 3.907621     | 67.726    | 952.3777  | 3064.9357                    | C        | 1.700553  | -0.010143                    | 3.157335  | 74.5299   | 1030.0847 | 3129.9693 |           |          |           |          |
| H                        | -0.603003 | -0.080391 | -0.984697 | 141.478  | 1164.755  | 3250.8687 | H                                   | -0.033438 | 0.949124 | 0.495016     | 152.2634  | 1210.6423 | H                            | 2.528024 | -0.278763 | 3.801466                     | 184.5447  | 1241.5948 | O         | 0.712101  | -0.901589 | 0.283504 | 234.306   | 1291.678 |
| H                        | -0.033438 | 0.949124  | 0.495016  | 184.5447 | 1241.5948 | H         | 1.734849                            | -0.268879 | 2.105463 | 442.7843     | 1481.5786 | O         | 1.310033                     | 1.354371 | 3.352636  | 478.4071                     | 1537.3761 | O         | 1.053778  | 2.026     | 2.194427  | 711.4431 | 1838.5148 |          |

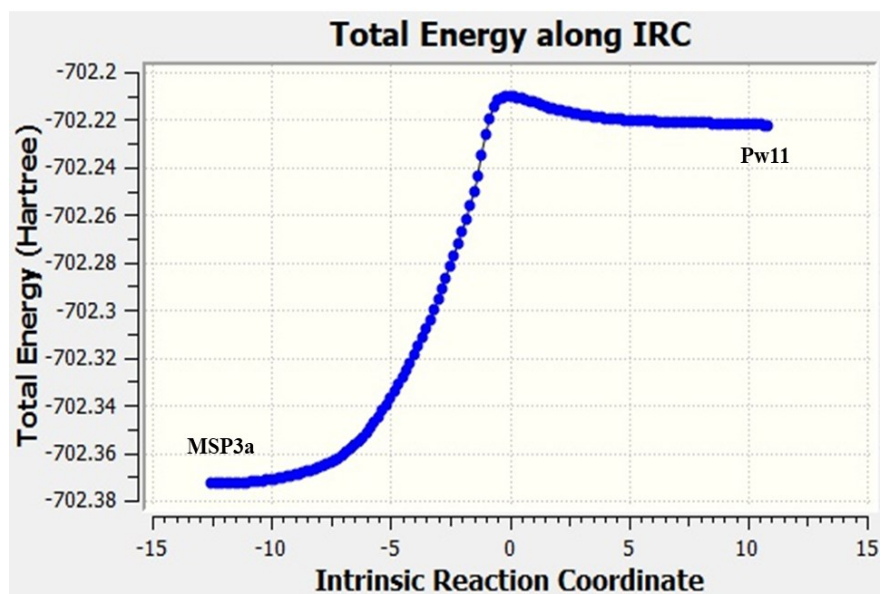

| Rx Coord  | Energy      | Rx Coord | Energy      | Rx Coord | Energy      |
|-----------|-------------|----------|-------------|----------|-------------|
| -12.52902 | -702.372912 | -4.67481 | -702.331437 | 3.17549  | -702.218284 |
| -12.36187 | -702.372888 | -4.50765 | -702.32844  | 3.34265  | -702.218535 |
| -12.19475 | -702.372857 | -4.34049 | -702.325327 | 3.50981  | -702.218769 |
| -12.02765 | -702.372819 | -4.17334 | -702.322099 | 3.67698  | -702.218985 |
| -11.86056 | -702.372771 | -4.00619 | -702.318745 | 3.84414  | -702.219187 |
| -11.69345 | -702.372713 | -3.83905 | -702.31526  | 4.0113   | -702.219373 |
| -11.52636 | -702.372644 | -3.6719  | -702.311634 | 4.17846  | -702.219546 |
| -11.35927 | -702.372564 | -3.50476 | -702.307863 | 4.34562  | -702.219705 |
| -11.19221 | -702.372472 | -3.33761 | -702.303936 | 4.51277  | -702.219851 |
| -11.02516 | -702.372368 | -3.17047 | -702.299849 | 4.67993  | -702.219985 |
| -10.85813 | -702.372249 | -3.00333 | -702.295597 | 4.84709  | -702.220109 |
| -10.69108 | -702.372112 | -2.83619 | -702.291184 | 5.01424  | -702.220221 |
| -10.52401 | -702.371955 | -2.66905 | -702.286613 | 5.18139  | -702.220324 |
| -10.3569  | -702.371772 | -2.50191 | -702.281893 | 5.34853  | -702.220417 |
| -10.18978 | -702.371562 | -2.33477 | -702.277032 | 5.51567  | -702.220502 |
| -10.02263 | -702.371322 | -2.16764 | -702.272033 | 5.6828   | -702.22058  |
| -9.85548  | -702.371052 | -2.00051 | -702.266888 | 5.84993  | -702.220652 |
| -9.68832  | -702.370751 | -1.8334  | -702.261589 | 6.01705  | -702.220718 |
| -9.52116  | -702.370419 | -1.66632 | -702.256105 | 6.18418  | -702.220779 |
| -9.35399  | -702.370055 | -1.49981 | -702.250339 | 6.35131  | -702.220837 |
| -9.18683  | -702.36966  | -1.33481 | -702.24357  | 6.51845  | -702.220891 |
| -9.01966  | -702.369235 | -1.16814 | -702.235107 | 6.68558  | -702.220943 |
| -8.85251  | -702.368784 | -1.00103 | -702.226484 | 6.85274  | -702.220994 |
| -8.68534  | -702.368306 | -0.8339  | -702.219411 | 7.01986  | -702.221043 |
| -8.5182   | -702.367805 | -0.66689 | -702.214508 | 7.18702  | -702.221093 |
| -8.35106  | -702.367276 | -0.5004  | -702.212011 | 7.35414  | -702.221143 |

|          |             |          |             |          |             |
|----------|-------------|----------|-------------|----------|-------------|
| -8.18396 | -702.366721 | -0.33369 | -702.210892 | 7.52129  | -702.221195 |
| -8.01689 | -702.366134 | -0.16707 | -702.210423 | 7.68841  | -702.221248 |
| -7.8499  | -702.365508 | 0        | -702.210294 | 7.85555  | -702.221306 |
| -7.68295 | -702.364827 | 0.16703  | -702.210399 | 8.02268  | -702.221365 |
| -7.51602 | -702.364073 | 0.33409  | -702.210674 | 8.18984  | -702.221428 |
| -7.34907 | -702.363222 | 0.50125  | -702.211078 | 8.35698  | -702.22149  |
| -7.18205 | -702.36225  | 0.66838  | -702.211569 | 8.52415  | -702.221555 |
| -7.01498 | -702.361141 | 0.83554  | -702.21212  | 8.69128  | -702.221618 |
| -6.84787 | -702.359887 | 1.00269  | -702.212699 | 8.85845  | -702.221684 |
| -6.68074 | -702.358484 | 1.16985  | -702.213286 | 9.02559  | -702.221747 |
| -6.51359 | -702.356936 | 1.33699  | -702.213862 | 9.19275  | -702.221812 |
| -6.34644 | -702.355243 | 1.50413  | -702.214415 | 9.35989  | -702.221873 |
| -6.17928 | -702.353409 | 1.67127  | -702.214939 | 9.52706  | -702.221935 |
| -6.01212 | -702.351439 | 1.8384   | -702.215432 | 9.69421  | -702.221992 |
| -5.84495 | -702.34934  | 2.00553  | -702.215891 | 9.86136  | -702.222049 |
| -5.67779 | -702.347119 | 2.17265  | -702.216315 | 10.02851 | -702.2221   |
| -5.51062 | -702.344783 | 2.33977  | -702.216709 | 10.19566 | -702.222147 |
| -5.34346 | -702.342334 | 2.5069   | -702.217073 | 10.36281 | -702.222188 |
| -5.17629 | -702.339774 | 2.67404  | -702.21741  | 10.52995 | -702.222224 |
| -5.00913 | -702.337102 | 2.84118  | -702.217723 | 10.69711 | -702.222254 |
| -4.84197 | -702.334323 | 3.00833  | -702.218013 | 10.86422 | -702.222279 |



TS4-6\_Im1b\_Pw12

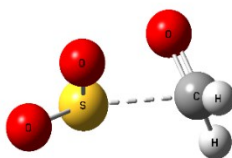

| Method                 | Ee          | E+ZPE       | $\Delta H$                     | $\Delta G$       |           |          |
|------------------------|-------------|-------------|--------------------------------|------------------|-----------|----------|
| M06-2X/GD3/cc-pVTZ     | -662.948264 | -662.911709 | -662.905815                    | -662.940113      |           |          |
| M06-2X/DG3/aug-cc-pVTZ | -662.955562 | -662.919071 | -662.913158                    | -662.9475        |           |          |
| MN15/cc-pVTZ           | -662.680055 | -662.643744 | -662.637845                    | -662.672125      |           |          |
| MN15/aug-cc-pVTZ       | -662.68958  | -662.653318 | -662.647407                    | -662.681719      |           |          |
| Coordinates (xyz)      |             |             | Vibrations (cm <sup>-1</sup> ) |                  |           |          |
| C                      | -0.000934   | 0.000535    | -0.002220                      | <b>248.5638i</b> | 826.863   | 3117.574 |
| S                      | -0.000161   | -0.000815   | 2.077430                       | 209.145          | 1072.437  |          |
| H                      | 1.063157    | 0.000408    | -0.258638                      | 231.2508         | 1151.2541 |          |
| H                      | -0.587003   | -0.855076   | -0.351199                      | 263.5475         | 1222.7973 |          |
| O                      | -0.577707   | 1.068423    | 0.369220                       | 489.2853         | 1427.4478 |          |
| O                      | 1.184992    | -0.233754   | 3.244868                       | 658.5295         | 1588.7117 |          |
| O                      | 1.390945    | 0.815582    | 2.222249                       | 731.1248         | 3027.8295 |          |

Pw12

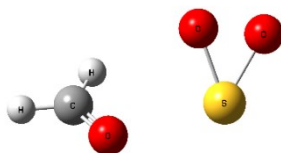

| Method                 |           |           |           | Ee                             | E+ZPE       | $\Delta H$  | $\Delta G$  |
|------------------------|-----------|-----------|-----------|--------------------------------|-------------|-------------|-------------|
| M06-2X/GD3/cc-pVTZ     |           |           |           | -662.967128                    | -662.93193  | -662.923976 | -662.963984 |
| M06-2X/DG3/aug-cc-pVTZ |           |           |           | -662.973399                    | -662.938212 | -662.930274 | -662.970242 |
| MN15/cc-pVTZ           |           |           |           | -662.698877                    | -662.663761 | -662.655904 | -662.695386 |
| MN15/aug-cc-pVTZ       |           |           |           | -662.707264                    | -662.6722   | -662.664351 | -662.703772 |
| Coordinates (xyz)      |           |           |           | Vibrations (cm <sup>-1</sup> ) |             |             |             |
| C                      | 0.001027  | 0.001029  | -0.000133 | 46.8705                        | 791.8571    | 3064.071    |             |
| S                      | -0.019788 | 0.014551  | 3.180448  | 103.2135                       | 1081.9433   |             |             |
| H                      | 1.036037  | 0.014636  | 0.374685  | 140.6056                       | 1226.3006   |             |             |
| H                      | -0.148115 | 0.035316  | -1.089474 | 148.5107                       | 1280.3898   |             |             |
| O                      | -0.934996 | -0.047162 | 0.751017  | 197.725                        | 1536.2419   |             |             |
| O                      | 1.112346  | 0.911337  | 4.021142  | 248.0754                       | 1847.5181   |             |             |
| O                      | 0.808855  | 1.353247  | 2.667004  | 754.1331                       | 2977.8317   |             |             |

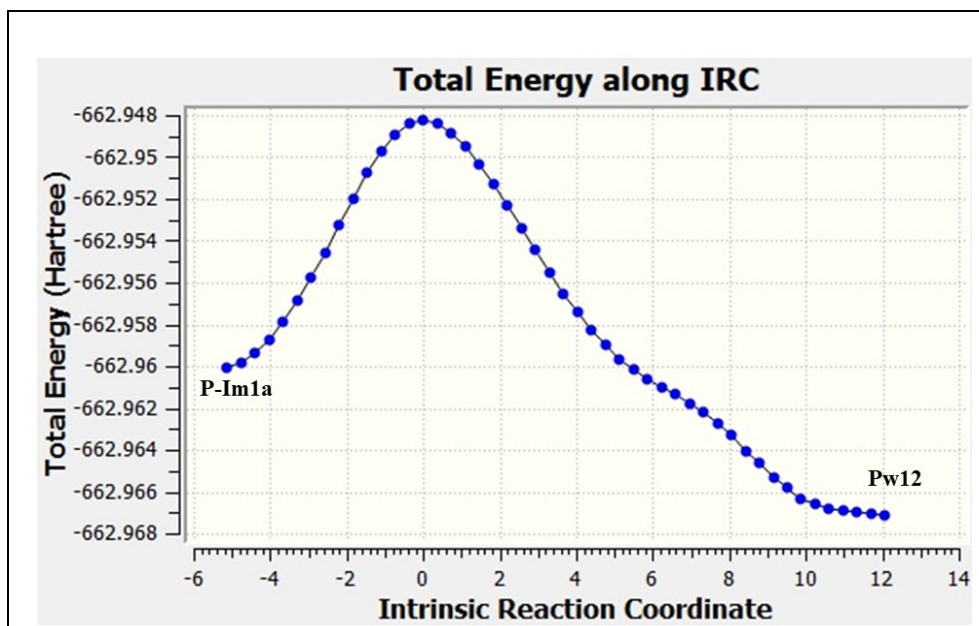

| Rx Coord | Energy      | Rx Coord | Energy      | Rx Coord | Energy      |
|----------|-------------|----------|-------------|----------|-------------|
| -5.13335 | -662.960052 | 0.73353  | -662.948838 | 6.59998  | -662.961368 |
| -4.76669 | -662.95984  | 1.10035  | -662.949494 | 6.96618  | -662.961785 |
| -4.39984 | -662.959383 | 1.46714  | -662.950324 | 7.33156  | -662.962179 |
| -4.03307 | -662.95872  | 1.83398  | -662.951284 | 7.69726  | -662.962784 |
| -3.66628 | -662.957876 | 2.20079  | -662.952321 | 8.06273  | -662.963298 |
| -3.29966 | -662.956887 | 2.56763  | -662.953396 | 8.42785  | -662.964057 |
| -2.93316 | -662.955772 | 2.93447  | -662.95447  | 8.79341  | -662.964619 |
| -2.56675 | -662.954562 | 3.30131  | -662.95552  | 9.15773  | -662.965369 |
| -2.20028 | -662.953282 | 3.66814  | -662.95652  | 9.52328  | -662.965822 |
| -1.83372 | -662.951997 | 4.03498  | -662.95745  | 9.88233  | -662.966355 |
| -1.46703 | -662.950777 | 4.40181  | -662.958286 | 10.24624 | -662.966559 |
| -1.10032 | -662.949726 | 4.76864  | -662.959019 | 10.59899 | -662.966809 |
| -0.73355 | -662.948923 | 5.13541  | -662.959648 | 10.9641  | -662.966908 |
| -0.36683 | -662.948431 | 5.5021   | -662.960179 | 11.32992 | -662.966993 |
| 0        | -662.948264 | 5.86847  | -662.960622 | 11.69646 | -662.967053 |
| 0.36683  | -662.948416 | 6.23462  | -662.961016 | 12.0625  | -662.967101 |

## II. Thermochemistry tables.

This section includes the thermochemical values ( $\Delta E$ ,  $\Delta E+ZPE$ ,  $\Delta G$  and  $\Delta H$ ) relative to reactants in kcal mol<sup>-1</sup> for barrier and final products for each calculated oxidation path. **TZ** stands for cc-pVTZ and **a-TZ** stands for aug-cc-pVTZ.

A. Table S2. Calculated relative energies (kcal mol<sup>-1</sup>) of the gas phase oxidation of AMS initiated by OH radicals in the absence of NO<sub>x</sub> radicals.

| REACTION                                                                 |      | ENERGY          | M06-2X/GD3/TZ |          | M06-2X/GD3/a-TZ |          | MN15/TZ |          | MN15/a-TZ |          | SVECV-f12 |          |
|--------------------------------------------------------------------------|------|-----------------|---------------|----------|-----------------|----------|---------|----------|-----------|----------|-----------|----------|
|                                                                          |      |                 | Barrier       | Products | Barrier         | Products | Barrier | Products | Barrier   | Products | Barrier   | Products |
| AMS+OH (PRC) → A1                                                        | TS   | $\Delta E$      | -4.01         | -34.69   | -3.55           | -34.06   | -6.27   | -35.36   | -5.83     | -34.89   | -5.01     | -32.12   |
|                                                                          |      | $\Delta(E+ZPE)$ | -1.74         | -30.34   | -1.38           | -29.76   | -4.02   | -31.04   | -3.68     | -30.61   | -2.84     | -27.82   |
|                                                                          |      | $\Delta H$      | -2.88         | -31.56   | -2.46           | -30.95   | -5.16   | -32.28   | -4.77     | -31.82   | -3.92     | -29.01   |
|                                                                          | 1-C1 | $\Delta G$      | 7.18          | -21.16   | 7.33            | -20.68   | 4.96    | -21.80   | 5.16      | -21.45   | 5.88      | -18.74   |
| A1+3/2O <sub>2</sub> → P1+MSP                                            |      | $\Delta E$      | -61.25        | -94.92   | -60.62          | -94.61   | -63.33  | -101.38  | -62.85    | -101.11  | -57.85    | -92.91   |
|                                                                          |      | $\Delta(E+ZPE)$ | -56.43        | -88.28   | -55.85          | -80.00   | -58.51  | -94.67   | -58.05    | -94.41   | -53.08    | -80.00   |
|                                                                          |      | $\Delta H$      | -58.41        | -90.35   | -57.80          | -90.05   | -60.55  | -96.80   | -60.07    | -96.54   | -55.04    | -88.35   |
|                                                                          | 1-1  | $\Delta G$      | -41.55        | -75.85   | -41.01          | -75.52   | -43.50  | -82.16   | -43.06    | -81.87   | -38.25    | -73.84   |
| A1O +3/2O <sub>2</sub> → P2+P3+HO <sub>2</sub>                           |      | $\Delta E$      | -59.49        | -73.85   | -58.92          | -73.85   | -61.81  | -80.19   | -61.37    | -79.64   | -56.00    | -75.41   |
|                                                                          |      | $\Delta(E+ZPE)$ | -55.02        | -72.10   | -54.46          | -72.10   | -57.23  | -78.44   | -56.76    | -77.90   | -51.54    | -70.00   |
|                                                                          |      | $\Delta H$      | -56.75        | -72.71   | -56.18          | -72.71   | -59.04  | -79.07   | -58.56    | -78.52   | -53.26    | -74.29   |
|                                                                          | 1-2  | $\Delta G$      | -40.82        | -69.92   | -40.27          | -69.92   | -42.84  | -76.23   | -42.36    | -75.27   | -37.35    | -71.13   |
| A1 → A2 → A2O                                                            |      | $\Delta E$      | -1.05         | -70.90   | -0.69           | -70.15   | -3.11   | -74.83   | -2.93     | -74.39   | -3.27     | -68.66   |
|                                                                          |      | $\Delta(E+ZPE)$ | 0.34          | -64.65   | 0.69            | -63.95   | -1.63   | -68.31   | -1.40     | -67.89   | -1.89     | -62.47   |
|                                                                          |      | $\Delta H$      | -0.42         | -66.62   | -0.06           | -65.89   | -2.47   | -70.44   | -2.25     | -70.01   | -2.65     | -64.40   |
|                                                                          | 1-3  | $\Delta G$      | 8.27          | -49.77   | 8.71            | -49.19   | 6.84    | -53.07   | 7.15      | -52.66   | 6.13      | -47.70   |
| A1O+3/2O <sub>2</sub> →A2O<br>+3/2O <sub>2</sub> → P2+P3+HO <sub>2</sub> |      | $\Delta E$      | -48.78        | -73.85   | -48.16          | -73.49   | -54.54  | -80.19   | -54.10    | -79.64   | -46.66    | -75.41   |
|                                                                          |      | $\Delta(E+ZPE)$ | -45.53        | -72.10   | -44.89          | -71.77   | -51.02  | -78.44   | -50.57    | -77.90   | -43.39    | -73.69   |
|                                                                          |      | $\Delta H$      | -47.98        | -72.71   | -47.32          | -72.37   | -53.55  | -79.07   | -53.09    | -78.52   | -45.82    | -74.29   |
|                                                                          | 1-4  | $\Delta G$      | -30.08        | -69.92   | -29.52          | -69.21   | -35.40  | -76.23   | -34.96    | -75.27   | -28.03    | -71.13   |

| REACTION                                          | ENERGY          | M06-2X/GD3/TZ |          | M06-2X/GD3/a-TZ |          | MN15/TZ |          | MN15/a-TZ |          | SVECV-fl2 |          |
|---------------------------------------------------|-----------------|---------------|----------|-----------------|----------|---------|----------|-----------|----------|-----------|----------|
|                                                   |                 | Barrier       | Products | Barrier         | Products | Barrier | Products | Barrier   | Products | Barrier   | Products |
| AMS+OH (PRC) → A2<br><b>1-C2</b>                  | $\Delta E$      | -1.20         | -33.65   | -0.67           | -32.93   | -3.67   | -34.26   | -3.24     | -33.67   | -2.13     | -31.05   |
|                                                   | $\Delta(E+ZPE)$ | 0.94          | -30.70   | 1.37            | -30.06   | -1.55   | -31.16   | -1.16     | -30.60   | -0.09     | -28.18   |
|                                                   | $\Delta H$      | -0.22         | -31.61   | 0.26            | -30.90   | -2.74   | -32.15   | -2.32     | -31.55   | -1.19     | -29.03   |
|                                                   | $\Delta G$      | 10.02         | -21.97   | 10.36           | -21.55   | 7.62    | -22.27   | 7.99      | -21.83   | 8.91      | -19.67   |
| A2O +2O <sub>2</sub> → P3+P4+MSP<br><b>1-5</b>    | $\Delta E$      | -59.81        | -128.48  | -59.09          | -128.13  | -62.23  | -136.53  | -61.64    | -136.12  | -56.11    | -128.13  |
|                                                   | $\Delta(E+ZPE)$ | -55.69        | -123.63  | -55.00          | -123.33  | -58.10  | -131.68  | -57.51    | -131.26  | -52.02    | -123.33  |
|                                                   | $\Delta H$      | -57.37        | -125.10  | -56.66          | -124.80  | -59.83  | -133.17  | -59.22    | -132.76  | -53.67    | -124.80  |
|                                                   | $\Delta G$      | -41.42        | -116.95  | -40.84          | -116.23  | -43.78  | -124.98  | -43.36    | -124.12  | -37.86    | -116.25  |
| A2O +2O <sub>2</sub> → 2P3+P5+P6+OH<br><b>1-7</b> | $\Delta E$      | -54.29        | -149.42  | -53.87          | -150.75  | -55.79  | -159.09  | -54.98    | -160.10  | -53.12    | -170.37  |
|                                                   | $\Delta(E+ZPE)$ | -56.69        | -151.20  | -55.40          | -152.57  | -57.03  | -160.79  | -56.21    | -161.84  | -54.65    | -100.00  |
|                                                   | $\Delta H$      | -56.74        | -150.90  | -55.24          | -143.80  | -56.99  | -160.52  | -56.17    | -161.57  | -54.49    | -171.90  |
|                                                   | $\Delta G$      | -64.92        | -158.57  | -63.33          | -150.19  | -65.24  | -168.53  | -63.99    | -168.33  | -62.58    | -178.77  |
| A2O + O <sub>2</sub> → 2P3+MSP<br><b>1-8</b>      | $\Delta E$      | 10.25         | -65.19   | 10.72           | -64.62   | 5.17    | -71.51   | 5.70      | -70.91   | 11.20     | -65.38   |
|                                                   | $\Delta(E+ZPE)$ | 8.57          | -63.49   | 9.01            | -62.93   | 3.58    | -69.76   | 4.15      | -69.14   | 9.50      | -63.70   |
|                                                   | $\Delta H$      | 8.51          | -64.16   | 8.98            | -63.60   | 3.48    | -70.45   | 4.06      | -69.83   | 9.47      | -64.37   |
|                                                   | $\Delta G$      | 10.80         | -61.55   | 11.61           | -60.16   | 5.92    | -67.80   | 6.88      | -66.32   | 12.09     | -60.94   |

B. Table S3. Calculated relative energies (kcal mol<sup>-1</sup>) for the gas phase decomposition of the A1O2 intermediate: C1 addition.

| REACTION                                      | ENERGY          | M06-2X/GD3/TZ |          | M06-2X/GD3/a-TZ |          | MN15/TZ |          | MN15/a-TZ |          |         |
|-----------------------------------------------|-----------------|---------------|----------|-----------------|----------|---------|----------|-----------|----------|---------|
|                                               |                 | Barrier       | Products | Barrier         | Products | Barrier | Products | Barrier   | Products |         |
| A1O2(Im1) + O <sub>2</sub> → P3+P6+P9+OH      | TS              | ΔE            | -25.84   | -118.53         | -24.92   | -119.83 | -31.82   | -126.62   | -31.10   | -127.87 |
|                                               |                 | Δ(E+ZPE)      | -20.71   | -117.12         | -19.85   | -85.00  | -26.64   | -125.22   | -26.00   | -126.53 |
|                                               |                 | ΔH            | -22.63   | -117.63         | -21.73   | -119.03 | -28.59   | -125.72   | -27.90   | -127.01 |
|                                               | 2-6             | ΔG            | -1.81    | -118.35         | -1.07    | -119.42 | -7.60    | -126.84   | -7.19    | -127.34 |
| A1O2(Im1) → P2+P3+OH                          |                 | ΔE            | -43.29   | -65.81          | -41.78   | -66.03  | -49.83   | -68.89    | -48.62   | -69.04  |
|                                               |                 | Δ(E+ZPE)      | -38.70   | -66.58          | -37.24   | -66.82  | -45.34   | -69.62    | -44.17   | -69.76  |
|                                               |                 | ΔH            | -41.72   | -66.46          | -40.24   | -66.69  | -48.35   | -69.51    | -47.16   | -69.66  |
|                                               | 2-2             | ΔG            | -17.56   | -67.37          | -16.14   | -67.23  | -24.20   | -70.39    | -23.05   | -70.12  |
| A1O2(Im2) → P2+P3+OH                          |                 | ΔE            | -14.63   | -65.81          | -15.23   | -66.03  | -18.92   | -68.89    | -19.42   | -69.04  |
|                                               |                 | Δ(E+ZPE)      | -15.35   | -66.58          | -15.97   | -66.82  | -19.62   | -69.62    | -20.10   | -69.76  |
|                                               |                 | ΔH            | -15.22   | -66.46          | -15.83   | -66.69  | -19.50   | -69.51    | -19.98   | -69.66  |
|                                               | P3              | ΔG            | -16.18   | -67.37          | -16.83   | -67.23  | -20.42   | -70.39    | -20.89   | -70.12  |
| A1O2(Im3) → P10+OH                            |                 | ΔE            | -19.40   | -95.51          | -18.98   | -95.89  | -43.62   | -98.20    | -44.22   | -98.68  |
|                                               |                 | Δ(E+ZPE)      | -15.63   | -91.53          | -15.39   | -75.00  | -39.37   | -94.28    | -39.93   | -94.79  |
|                                               |                 | ΔH            | -17.59   | -92.41          | -17.28   | -92.84  | -41.54   | -95.14    | -42.06   | -95.62  |
|                                               | 2-7             | ΔG            | 3.98     | -81.05          | 4.11     | -81.73  | -19.25   | -83.87    | -19.87   | -84.59  |
| Im3_1 → P11+HO <sub>2</sub>                   |                 | ΔE            | -46.26   | -48.57          | -45.46   | -48.36  | -52.37   | -53.63    | -51.92   | -53.61  |
|                                               |                 | Δ(E+ZPE)      | -39.82   | -43.75          | -39.13   | -43.59  | -45.96   | -48.79    | -45.59   | -48.78  |
|                                               |                 | ΔH            | -41.85   | -44.96          | -41.11   | -44.79  | -48.03   | -50.03    | -47.62   | -50.02  |
|                                               | 2-8             | ΔG            | -20.31   | -35.32          | -19.77   | -35.16  | -26.26   | -40.30    | -25.97   | -40.27  |
| A1O2(Im3) → P1+P12+OH                         |                 | ΔE            | -50.44   | -26.00          | -49.25   | -27.20  | -55.51   | -31.44    | -54.63   | -32.68  |
|                                               |                 | Δ(E+ZPE)      | -45.13   | -26.60          | -43.99   | -27.81  | -50.26   | -31.89    | -49.43   | -33.05  |
|                                               |                 | ΔH            | -48.27   | -26.94          | -47.12   | -28.16  | -53.41   | -32.30    | -52.56   | -33.49  |
|                                               | 2-5             | ΔG            | -23.84   | -27.13          | -22.75   | -28.76  | -28.92   | -32.75    | -28.10   | -33.89  |
| A1O2+NO <sub>2</sub> → P1+MSP+NO <sub>3</sub> |                 | ΔE            | --       | -80.26          | --       | -79.96  | --       | -91.48    | -        | -91.11  |
|                                               |                 | Δ(E+ZPE)      | --       | -72.47          | --       | -72.12  | --       | -84.28    | -        | -84.01  |
|                                               |                 | ΔH            | --       | -75.20          | --       | -74.89  | --       | -87.00    | -        | -86.70  |
|                                               | NO <sub>x</sub> | ΔG            | --       | -55.66          | --       | -54.88  | --       | -66.98    | -        | -66.72  |

C. Table S4. Calculated relative energies (kcal mol<sup>-1</sup>) for the gas phase decomposition of the A2O2 intermediate: C2 addition.

| REACTION                            | ENERGY          | M06-2X/GD3/TZ |          | M06-2X/GD3/a-TZ |          | MN15/TZ |          | MN15/a-TZ |          |
|-------------------------------------|-----------------|---------------|----------|-----------------|----------|---------|----------|-----------|----------|
|                                     |                 | Barrier       | Products | Barrier         | Products | Barrier | Products | Barrier   | Products |
| TS<br>A2O2(Im1) → P2+P3+OH          | $\Delta E$      | 15.97         | -65.81   | 15.42           | -66.03   | 11.20   | -68.89   | 10.73     | -69.04   |
|                                     | $\Delta(E+ZPE)$ | -33.81        | 11.49    | -33.10          | 10.89    | -40.55  | 6.84     | -40.01    | 6.37     |
|                                     | $\Delta H$      | 11.72         | -66.46   | 11.13           | -66.69   | 7.04    | -69.51   | 6.58      | -69.66   |
|                                     | $\Delta G$      | 10.59         | -67.37   | 10.36           | -67.23   | 6.02    | -70.39   | 5.94      | -70.12   |
| 3-5<br>A2O2(Im1) → P2+P3+OH         | $\Delta E$      | -45.42        | -65.81   | -44.49          | -66.03   | -50.45  | -68.89   | -49.54    | -69.04   |
|                                     | $\Delta(E+ZPE)$ | -44.31        | -40.05   | -43.19          | -39.13   | -50.16  | -45.06   | -49.23    | -44.18   |
|                                     | $\Delta H$      | -42.14        | -66.46   | -41.21          | -66.69   | -47.21  | -69.51   | -46.32    | -69.66   |
|                                     | $\Delta G$      | -20.80        | -67.37   | -19.88          | -67.23   | -25.71  | -70.39   | -24.84    | -70.12   |
| A2O2(Im2) → P3+P13+OH               | $\Delta E$      | -47.61        | -64.26   | -46.52          | -64.78   | -53.07  | -68.55   | -52.34    | -69.00   |
|                                     | $\Delta(E+ZPE)$ | -42.81        | -64.12   | -41.78          | -64.68   | -48.27  | -68.32   | -47.58    | -68.75   |
|                                     | $\Delta H$      | -45.58        | -64.09   | -44.52          | -64.64   | -51.09  | -68.32   | -50.38    | -68.75   |
|                                     | $\Delta G$      | -22.00        | -65.05   | -21.02          | -65.29   | -27.29  | -69.24   | -26.65    | -69.21   |
| 3-7<br>A2O2+NO <sub>2</sub> → P7+P8 | $\Delta E$      | -57.80        | -146.21  | -56.46          | -145.45  | -65.70  | -150.49  | -64.67    | -149.76  |
|                                     | $\Delta(E+ZPE)$ | -49.87        | -136.72  | -48.62          | -136.09  | -57.98  | -141.17  | -56.99    | -140.52  |
|                                     | $\Delta H$      | -53.14        | -139.23  | -51.86          | -138.55  | -61.20  | -143.69  | -60.18    | -143.00  |
|                                     | $\Delta G$      | -17.92        | -117.48  | -16.38          | -116.66  | -25.60  | -121.40  | -24.70    | -120.95  |
| NO <sub>x</sub>                     |                 |               |          |                 |          |         |          |           |          |



D. Table S5. Calculated relative energies (kcal mol<sup>-1</sup>) for the gas phase decomposition of the MSP intermediate.

| REACTION                                                | ENERGY          | M06-2X/GD3/TZ |          | M06-2X/GD3/a-TZ |          | MN15/TZ |          | MN15/a-TZ |          |
|---------------------------------------------------------|-----------------|---------------|----------|-----------------|----------|---------|----------|-----------|----------|
|                                                         |                 | Barrier       | Products | Barrier         | Products | Barrier | Products | Barrier   | Products |
| 2MSP→2P3+DMDS                                           | $\Delta E$      | --            | -125.86  | --              | -125.79  | --      | -129.20  | --        | -129.46  |
|                                                         | $\Delta(E+ZPE)$ | --            | -122.64  | --              | -122.59  | --      | -125.96  | --        | -126.20  |
|                                                         | $\Delta H$      | --            | -123.54  | --              | -123.50  | --      | -126.93  | --        | -127.17  |
|                                                         | $\Delta G$      | --            | -119.78  | --              | -119.33  | --      | -122.57  | --        | -123.43  |
| MSP+O <sub>2</sub> →2P3+P6+OH                           | $\Delta E$      | --            | -188.08  | --              | -189.99  | --      | -199.57  | --        | -201.27  |
|                                                         | $\Delta(E+ZPE)$ | --            | -187.37  | --              | -189.33  | --      | -198.73  | --        | -200.50  |
|                                                         | $\Delta H$      | --            | -187.76  | --              | -189.72  | --      | -199.20  | --        | -200.96  |
|                                                         | $\Delta G$      | --            | -189.51  | --              | -190.66  | --      | -201.20  | --        | -201.72  |
| MSP→MSP1→P3+P14+OH                                      | $\Delta E$      | -57.65        | -78.48   | -57.51          | -79.56   | -66.37  | -84.07   | -66.21    | -85.01   |
|                                                         | $\Delta(E+ZPE)$ | -53.90        | -79.89   | -53.82          | -80.98   | -62.64  | -85.33   | -62.53    | -86.27   |
|                                                         | $\Delta H$      | -55.53        | -79.64   | -55.42          | -80.74   | -63.66  | -85.15   | -63.50    | -86.08   |
|                                                         | $\Delta G$      | -42.22        | -86.06   | -42.24          | -86.75   | -52.20  | -91.41   | -51.99    | -91.93   |
| MSP1+O <sub>2</sub> →MSP2→2P3+P15+OH                    | $\Delta E$      | -39.46        | -129.09  | -40.30          | -130.85  | -55.44  | -135.32  | -56.14    | -137.07  |
|                                                         | $\Delta(E+ZPE)$ | -36.81        | -129.97  | -37.70          | -131.76  | -52.63  | -136.09  | -53.38    | -137.89  |
|                                                         | $\Delta H$      | -38.81        | -129.75  | -39.69          | -131.54  | -54.70  | -135.94  | -55.44    | -137.73  |
|                                                         | $\Delta G$      | -22.26        | -136.93  | -23.19          | -137.90  | -37.93  | -142.96  | -38.69    | -143.92  |
| MSP2+1/2O <sub>2</sub> →2P3+P6+OH                       | $\Delta E$      | -47.88        | -188.08  | -50.28          | -189.99  | -58.42  | -199.57  | -60.70    | -201.27  |
|                                                         | $\Delta(E+ZPE)$ | -44.87        | -187.37  | -47.28          | -189.33  | -55.32  | -198.73  | -57.60    | -200.50  |
|                                                         | $\Delta H$      | -46.32        | -187.76  | -48.72          | -189.72  | -56.81  | -199.20  | -59.09    | -200.96  |
|                                                         | $\Delta G$      | -41.76        | -189.51  | -44.17          | -190.66  | -52.11  | -201.20  | -54.38    | -201.72  |
| MSP2→MSP3+O <sub>2</sub> →P3+P16+HO <sub>2</sub> +2OH   | $\Delta E$      | -89.76        | -127.30  | -92.32          | -129.62  | -96.80  | -139.15  | -99.07    | -141.05  |
|                                                         | $\Delta(E+ZPE)$ | -92.39        | -128.94  | -94.96          | -131.29  | -99.34  | -140.59  | -101.64   | -142.55  |
|                                                         | $\Delta H$      | -91.86        | -128.45  | -94.43          | -130.81  | -98.85  | -140.18  | -101.15   | -142.13  |
|                                                         | $\Delta G$      | -98.90        | -134.71  | -101.05         | -136.66  | -105.78 | -146.27  | -107.66   | -147.81  |
| MSP3→MSP3-b+2OH+O <sub>2</sub> →P17+2OH+HO <sub>2</sub> | $\Delta E$      | -92.32        | -124.08  | -94.45          | -126.41  | -100.62 | -136.39  | -102.74   | -138.51  |
|                                                         | $\Delta(E+ZPE)$ | -92.69        | -123.84  | -94.93          | -126.22  | -100.74 | -135.90  | -102.93   | -138.09  |
|                                                         | $\Delta H$      | -93.07        | -124.05  | -95.30          | -126.42  | -101.26 | -136.19  | -103.43   | -138.37  |
|                                                         | $\Delta G$      | -88.95        | -120.40  | -91.18          | -122.81  | -96.48  | -132.34  | -98.69    | -134.55  |
| MSP3→MSP3-a+OH+O <sub>2</sub> →2P3+P15+OH               | $\Delta E$      | -71.46        | -129.09  | -72.01          | -130.85  | -83.91  | -135.32  | -84.59    | -137.07  |
|                                                         | $\Delta(E+ZPE)$ | -63.55        | -129.97  | -64.14          | -131.76  | -75.88  | -136.09  | -76.57    | -137.89  |
|                                                         | $\Delta H$      | -66.51        | -129.75  | -67.09          | -131.54  | -78.92  | -135.94  | -79.62    | -137.73  |
|                                                         | $\Delta G$      | -40.30        | -136.93  | -40.95          | -137.90  | -52.45  | -142.96  | -53.12    | -143.92  |
